# Supplementary material for: Identification of protein-protected mRNA fragments and structured excised intron RNAs in human plasma by TGIRT-seq peak calling
Source: eLife. 2020 Sep 2;9:e60743. doi: 10.7554/eLife.60743 (PMC7518892; doi:10.7554/eLife.60743)
Supplement: Supplementary file 1. [file elife-60743-supp1.xlsx]

## Sheet: Mapping statistics
Sample name	Dataset name	Sample type	Plasma batch	Treatment	RT condition	Library prep method	RAW	Trimmed	UniVec	rRNA/Mt	small RNA	HISAT2 all	HISAT2 unique	BOWTIE2 all	BOWTIE2 unique	Mapping rate	Duplicated reads	Soft-clipped base	Fusion reads	Deposited file 1	Deposited file 2	Comments
DNaseI_1	QCF1	total plasma	batch 1	DNase I	Low-salt	TGIRT-seq	17454019	15,572,939 (89.2%)	1,422,137 (9.1%)	4,473,360 (31.6%)	6,768,490 (69.9%)	201,038 (6.9%)	181,968 (90.5%)	426,419 (15.7%)	51,003 (12.0%)	0.838773	0.639	0.024	0.00488	QCF1_R1_001.fastq.gz	QCF1_R2_001.fastq.gz	Column I: number of reads after adaptor trimming, and the percentage of RAW reads.
DNaseI_2	QCF2	total plasma	batch 1	DNase I	Low-salt	TGIRT-seq	22734479	21,374,330 (94.0%)	1,862,487 (8.7%)	6,598,634 (33.8%)	8,754,010 (67.8%)	253,174 (6.1%)	224,901 (88.8%)	558,809 (14.3%)	85,824 (15.4%)	0.828452	0.63	0.025	0.004638	QCF2_R1_001.fastq.gz	QCF2_R2_001.fastq.gz
DNaseI_3	Qcf4	total plasma	batch 1	DNase I	Low-salt	TGIRT-seq	12209553	10,353,269 (84.8%)	140,061 (1.4%)	5,605,806 (54.9%)	3,052,424 (66.3%)	56,562 (3.6%)	42,838 (75.7%)	180,777 (12.1%)	35,775 (19.8%)	0.870987	0.361	0.022941	0.015441	Qcf4_R1_001.fastq.gz	Qcf4_R2_001.fastq.gz	Column J-M,O: number of reads mapped in that step/category, and the percentage of mapped reads after the previous step in the pipeline (previous column). For example: in J2, there are 4,473,360 reads mapped to rRNA or Mt, and the unmapped reads from the previous step is (15,572,939-1,422,137)=14,150,802, and the percentage is 4,473,360/14,150,802=31.6%
DNaseI_4	Qcf5	total plasma	batch 1	DNase I	Low-salt	TGIRT-seq	9835292	7,032,580 (71.5%)	115,611 (1.6%)	3,706,121 (53.6%)	2,009,644 (62.6%)	42,819 (3.6%)	30,704 (71.7%)	161,017 (13.9%)	33,432 (20.8%)	0.855809	0.364	0.0232	0.012984	Qcf5_R1_001.fastq.gz	Qcf5_R2_001.fastq.gz
DNaseI_5	Qcf6_SS	total plasma	batch 1	DNase I	Low-salt	TGIRT-seq	10798548	9,023,456 (83.6%)	129,098 (1.4%)	5,372,443 (60.4%)	2,108,795 (59.9%)	95,498 (6.8%)	80,147 (83.9%)	181,702 (13.8%)	50,643 (27.9%)	0.872288	0.52	0.0239	0.018395	Qcf6_SS_R1_001.fastq.gz	Qcf6_SS_R2_001.fastq.gz
DNaseI_6	Qcf7	total plasma	batch 1	DNase I	Low-salt	TGIRT-seq	13188083	11,800,957 (89.5%)	99,851 (0.8%)	5,883,162 (50.3%)	4,523,808 (77.8%)	56,304 (4.4%)	47,595 (84.5%)	194,299 (15.7%)	37,255 (19.2%)	0.910818	0.371	0.0232	0.017792	Qcf7_R1_001.fastq.gz	Qcf7_R2_001.fastq.gz
DNaseI_7	Qcf8	total plasma	batch 1	DNase I	Low-salt	TGIRT-seq	12428429	10,871,811 (87.5%)	192,308 (1.8%)	7,694,892 (72.1%)	1,942,787 (65.1%)	57,863 (5.6%)	48,700 (84.2%)	138,844 (14.1%)	40,113 (28.9%)	0.920866	0.438	0.0251	0.03699	Qcf8_R1_001.fastq.gz	Qcf8_R2_001.fastq.gz
DNaseI_8	Qcf9	total plasma	batch 1	DNase I	Low-salt	TGIRT-seq	11572310	10,336,166 (89.3%)	222,183 (2.1%)	7,087,925 (70.1%)	1,809,304 (59.8%)	74,243 (6.1%)	63,613 (85.7%)	147,273 (12.9%)	45,475 (30.9%)	0.901598	0.447	0.0232	0.030017	Qcf9_R1_001.fastq.gz	Qcf9_R2_001.fastq.gz
DNaseI_9	Qcf10	total plasma	batch 1	DNase I	Low-salt	TGIRT-seq	14321566	12,809,279 (89.4%)	180,759 (1.4%)	9,429,777 (74.7%)	1,956,876 (61.2%)	84,774 (6.8%)	73,905 (87.2%)	162,609 (14.1%)	51,485 (31.7%)	0.921251	0.398	0.022	0.027822	Qcf10_R1_001.fastq.gz	Qcf10_R2_001.fastq.gz
DNaseI_10	Qcf11	total plasma	batch 1	DNase I	Low-salt	TGIRT-seq	27149578	26,302,830 (96.9%)	291,999 (1.1%)	16,149,932 (62.1%)	8,429,900 (85.5%)	69,821 (4.9%)	47,144 (67.5%)	288,967 (21.2%)	79,945 (27.7%)	0.958778	0.437	0.024	0.040602	Qcf11_R1_001.fastq.gz	Qcf11_R2_001.fastq.gz	Column N,P: number of uniquely mapped reads in that step, and the percentage of uniquely mapped reads in all mapped reads from that step
DNaseI_11	Qcf12	total plasma	batch 2	DNase I	Low-salt	TGIRT-seq	17726774	15,416,247 (87.0%)	192,609 (1.2%)	5,668,750 (37.2%)	6,490,660 (67.9%)	76,953 (2.5%)	55,381 (72.0%)	442,937 (14.8%)	66,043 (14.9%)	0.832869	0.316	0.0251	0.015045	Qcf12_R1_001.fastq.gz	Qcf12_R2_001.fastq.gz
DNaseI_12	Qcf13	total plasma	batch 2	DNase I	Low-salt	TGIRT-seq	12958632	11,193,908 (86.4%)	141,747 (1.3%)	3,933,146 (35.6%)	4,868,797 (68.4%)	57,200 (2.5%)	41,589 (72.7%)	327,283 (14.9%)	49,298 (15.1%)	0.831188	0.237	0.0246	0.015547	Qcf13_R1_001.fastq.gz	Qcf13_R2_001.fastq.gz
ExoI_1	Qcf_DE1	total plasma	batch 1	DNase I + Exo I	Low-salt	TGIRT-seq	22423957	18,873,456 (84.2%)	446,621 (2.4%)	13,115,318 (71.2%)	2,552,865 (48.1%)	146,076 (5.3%)	116,352 (79.7%)	274,985 (10.5%)	84,640 (30.8%)	0.873142	0.555	0.0243	0.029831	Qcf_DE1_R1_001.fastq.gz	Qcf_DE1_R2_001.fastq.gz	Column Q: Overall mapping rate, calculated by (J+K+L+N)/(H-I), (rRNA+Mt+small RNA+HISAT2+BOWTIE2)/(Trimmed-UniVec)
ExoI_2	Qcf_ED1	total plasma	batch 1	DNase I + Exo I	Low-salt	TGIRT-seq	11306546	9,592,214 (84.8%)	210,313 (2.2%)	6,611,237 (70.5%)	1,223,475 (44.2%)	274,879 (17.8%)	237,545 (86.4%)	269,669 (21.2%)	90,845 (33.7%)	0.89313	0.439	0.0223	0.027896	Qcf_ED1_R1_001.fastq.gz	Qcf_ED1_R2_001.fastq.gz
ExoI_3	Qcf_Exo1	total plasma	batch 1	Exo I	Low-salt	TGIRT-seq	16430057	13,827,100 (84.2%)	292,843 (2.1%)	6,075,802 (44.9%)	3,905,995 (52.4%)	490,239 (13.8%)	432,980 (88.3%)	570,745 (18.6%)	152,640 (26.7%)	0.815913	0.42	0.0151	0.017821	Qcf_Exo1_R1_001.fastq.gz	Qcf_Exo1_R2_001.fastq.gz
Frag_1	Qcf_Frag1	total plasma	batch 1	DNase I + Fragmentation + T4PNK	Low-salt	TGIRT-seq	10291657	9,150,615 (88.9%)	77,643 (0.8%)	3,604,939 (39.7%)	213,117 (3.9%)	3,041,087 (57.9%)	2,817,661 (92.7%)	1,449,644 (65.5%)	655,652 (45.2%)	0.915773	0.16	0.0172	0.003014	Qcf_Frag1_R1_001.fastq.gz	Qcf_Frag1_R2_001.fastq.gz
Frag_2	Qcf_Frag2	total plasma	batch 1	DNase I + Fragmentation + T4PNK	Low-salt	TGIRT-seq	13883004	11,491,945 (82.8%)	125,976 (1.1%)	4,659,838 (41.0%)	787,147 (11.7%)	3,303,669 (55.8%)	3,059,363 (92.6%)	1,551,779 (59.3%)	654,339 (42.2%)	0.906428	0.554	0.0182	0.006463	Qcf_Frag2_R1_001.fastq.gz	Qcf_Frag2_R2_001.fastq.gz
Frag_3	Qcf_Frag3	total plasma	batch 1	DNase I + Fragmentation + T4PNK	Low-salt	TGIRT-seq	16447815	15,772,276 (95.9%)	129,183 (0.8%)	14,403,427 (92.1%)	503,187 (40.6%)	147,550 (20.0%)	101,189 (68.6%)	93,520 (15.9%)	20,569 (22.0%)	0.96833	0.4	0.0182	0.003407	Qcf_Frag3_R1_001.fastq.gz	Qcf_Frag3_R2_001.fastq.gz
Frag_4	Qcf_Frag4	total plasma	batch 2	DNase I + Fragmentation + T4PNK	Low-salt	TGIRT-seq	14817482	13,299,179 (89.8%)	153,351 (1.2%)	6,610,334 (50.3%)	1,440,285 (22.0%)	2,119,773 (41.6%)	1,944,033 (91.7%)	1,153,891 (38.8%)	476,331 (41.3%)	0.861436	0.309	0.0188	0.004053	Qcf_Frag4_R1_001.fastq.gz	Qcf_Frag4_R2_001.fastq.gz
Frag_5	Qcf_Frag5	total plasma	batch 2	DNase I + Fragmentation + T4PNK	Low-salt	TGIRT-seq	17689781	15,600,578 (88.2%)	181,121 (1.2%)	7,261,118 (47.1%)	1,452,154 (17.8%)	2,828,824 (42.2%)	2,593,120 (91.7%)	1,614,109 (41.6%)	695,166 (43.1%)	0.853221	0.238	0.0185	0.005539	Qcf_Frag5_R1_001.fastq.gz	Qcf_Frag5_R2_001.fastq.gz
DNaseI_PNK_1	Qcf_Phos1	total plasma	batch 1	DNase I + T4PNK	Low-salt	TGIRT-seq	26861234	24,448,066 (91.0%)	218,861 (0.9%)	12,064,706 (49.8%)	1,285,679 (10.6%)	6,638,037 (61.0%)	6,198,129 (93.4%)	3,048,805 (71.9%)	1,329,765 (43.6%)	0.950804	0.503	0.021	0.007334	Qcf_Phos1_R1_001.fastq.gz	Qcf_Phos1_R2_001.fastq.gz
DNaseI_PNK_2	Qcf_Phos2	total plasma	batch 2	DNase I + T4PNK	Low-salt	TGIRT-seq	12403854	10,775,103 (86.9%)	239,481 (2.2%)	3,936,600 (37.4%)	2,738,647 (41.5%)	519,459 (13.5%)	464,606 (89.4%)	580,071 (17.4%)	189,916 (32.7%)	0.737951	0.274	0.0227	0.005487	Qcf_Phos2_R1_001.fastq.gz	Qcf_Phos2_R2_001.fastq.gz
DNaseI_PNK_3	Qcf_Phos3	total plasma	batch 2	DNase I + T4PNK	Low-salt	TGIRT-seq	16833976	14,801,178 (87.9%)	400,873 (2.7%)	5,209,527 (36.2%)	3,264,507 (35.5%)	742,444 (12.5%)	650,968 (87.7%)	879,208 (17.0%)	274,706 (31.2%)	0.701074	0.264	0.024	0.005961	Qcf_Phos3_R1_001.fastq.gz	Qcf_Phos3_R2_001.fastq.gz
Untreated_1	Qcf_All1	total plasma	batch 1	Untreated	Low-salt	TGIRT-seq	9102660	8,385,863 (92.1%)	27,420 (0.3%)	865,069 (10.3%)	487,680 (6.5%)	4,753,501 (67.9%)	4,485,145 (94.4%)	1,792,336 (79.6%)	784,529 (43.8%)	0.944983	0.784	0.0129	0.011171	Qcf_All1_R1_001.fastq.gz	Qcf_All1_R2_001.fastq.gz
Untreated_2	Qcf_All2	total plasma	batch 1	Untreated	Low-salt	TGIRT-seq	28593070	27,545,540 (96.3%)	345,664 (1.3%)	6,264,397 (23.0%)	4,187,439 (20.0%)	12,662,585 (75.6%)	11,903,342 (94.0%)	3,222,717 (78.9%)	1,029,162 (31.9%)	0.968282	0.561	0.0132	0.023098	Qcf_All2_R1_001.fastq.gz	Qcf_All2_R2_001.fastq.gz
Untreated_3	Qcf_All3	total plasma	batch 1	Untreated	Low-salt	TGIRT-seq	36967198	35,230,895 (95.3%)	395,154 (1.1%)	7,265,224 (20.9%)	4,844,247 (17.6%)	17,492,965 (77.0%)	16,484,419 (94.2%)	4,156,102 (79.4%)	1,232,758 (29.7%)	0.969078	0.819	0.0139	0.031297	Qcf_All3_R1_001.fastq.gz	Qcf_All3_R2_001.fastq.gz
NaOH_1	Qcf_Na1	total plasma	batch 1	Alkaline hydrolysis	Low-salt	TGIRT-seq	11017474	10,225,849 (92.8%)	6,080 (0.1%)	330,190 (3.2%)	11,234 (0.1%)	7,247,457 (73.4%)	6,893,701 (95.1%)	2,305,262 (87.6%)	992,802 (43.1%)	0.968138	0.121	0.01109	0.0122	Qcf_Na1_R1_001.fastq.gz	Qcf_Na1_R2_001.fastq.gz
NaOH_2	Qcf_NA2	total plasma	batch 1	Alkaline hydrolysis	Low-salt	TGIRT-seq	9799773	8,797,699 (89.8%)	19,120 (0.2%)	279,098 (3.2%)	11,905 (0.1%)	5,705,882 (67.2%)	5,378,440 (94.3%)	2,414,992 (86.8%)	1,113,878 (46.1%)	0.958228	0.067	0.0141	0.006593	Qcf_NA2_R1_001.fastq.gz	Qcf_NA2_R2_001.fastq.gz
NaOH_3	Qcf_NA3	total plasma	batch 1	Alkaline hydrolysis	Low-salt	TGIRT-seq	22141277	21,739,391 (98.2%)	11,475 (0.1%)	731,496 (3.4%)	20,943 (0.1%)	17,952,246 (85.6%)	17,126,287 (95.4%)	2,560,578 (84.7%)	664,199 (25.9%)	0.978707	0.364	0.00927	0.033509	Qcf_NA3_R1_001.fastq.gz	Qcf_NA3_R2_001.fastq.gz
NaOH_4	Qcf_NA4	total plasma	batch 1	Alkaline hydrolysis	Low-salt	TGIRT-seq	22677784	22,242,411 (98.1%)	17,317 (0.1%)	851,444 (3.8%)	22,211 (0.1%)	18,077,501 (84.7%)	17,241,234 (95.4%)	2,851,600 (87.1%)	749,404 (26.3%)	0.980997	0.336	0.00923	0.030106	Qcf_NA4_R1_001.fastq.gz	Qcf_NA4_R2_001.fastq.gz
SMART_1	Qcf_L1	total plasma	batch 1	DNase I	NA	SMART-seq	104603910	3,543,240 (3.4%)	3,342 (0.1%)	811,869 (22.9%)	5,499 (0.2%)	1,921,760 (70.6%)	1,795,659 (93.4%)	366,911 (45.8%)	129,870 (35.4%)	0.877437	NA	NA	0.00592	Qcf_L1_R1_001.fastq.gz	Qcf_L1_R2_001.fastq.gz
SMART_2	Qcf_L2	total plasma	batch 1	DNase I	NA	SMART-seq	115662210	3,004,612 (2.6%)	5,304 (0.2%)	1,313,946 (43.8%)	1,502 (0.1%)	1,250,635 (74.3%)	1,106,114 (88.4%)	214,704 (49.6%)	59,621 (27.8%)	0.927143	NA	NA	0.014047	Qcf_L2_R1_001.fastq.gz	Qcf_L2_R2_001.fastq.gz
SMART_3	Qcf_L3	total plasma	batch 1	DNase I	NA	SMART-seq	60869441	2,672,864 (4.4%)	19,630 (0.7%)	1,008,925 (38.0%)	20,140 (1.2%)	1,028,424 (63.3%)	898,788 (87.4%)	259,373 (43.5%)	71,144 (27.4%)	0.873222	NA	NA	0.011308	Qcf_L3_R1_001.fastq.gz	Qcf_L3_R2_001.fastq.gz
SMART_4	Qcf_L4	total plasma	batch 1	DNase I	NA	SMART-seq	54594842	4,719,377 (8.6%)	72,242 (1.5%)	1,509,842 (32.5%)	16,991 (0.5%)	2,052,541 (65.8%)	1,878,537 (91.5%)	462,185 (43.3%)	153,543 (33.2%)	0.869688	NA	NA	0.00815	Qcf_L4_R1_001.fastq.gz	Qcf_L4_R2_001.fastq.gz
WGS-sim	genome-sim	Whole genome simulation	NA	NA	NA	NA	96579324	96,550,646 (100.0%)	2,513 (0.0%)	3,365,616 (3.5%)	74,857 (0.1%)	92,747,260 (99.6%)	89,378,799 (96.4%)	360,256 (100.0%)	29,382 (8.2%)	0.865811	NA	NA	NA	genome-sim_R1_001.fastq.gz	genome-sim_R2_001.fastq.gz

## Sheet: miRNA (Plasma DNase I)
Name	All	Mature	All (CPM)	Mature (CPM)	Comments
hsa-mir-223	126	120	2.88826	2.75072	miRNA reads were deduplicated, then alignments contain more than 5 soft-clipped nucleotides were filtered.
hsa-let-7c	49	49	1.12321	1.12321	All: All reads mapped to miRNA loci
hsa-let-7f-1	47	4	1.07737	0.0916908	Mature: Reads mapped to miRNA loci that are shorter than 35 nt
hsa-let-7b	43	25	0.985676	0.573068
hsa-mir-145	42	42	0.962753	0.962753
hsa-mir-142	42	31	0.962753	0.710604
hsa-mir-21	34	34	0.779372	0.779372
hsa-let-7g	34	6	0.779372	0.137536
hsa-mir-877	34	0	0.779372	0
hsa-mir-1285-1	28	15	0.641836	0.343841
hsa-let-7a-2	25	25	0.573068	0.573068
hsa-mir-126	25	25	0.573068	0.573068
hsa-mir-150	25	23	0.573068	0.527222
hsa-mir-342	24	12	0.550145	0.275072
hsa-let-7a-1	23	4	0.527222	0.0916908
hsa-mir-744	23	2	0.527222	0.0458454
hsa-let-7i	20	4	0.458454	0.0916908
hsa-mir-16-1	19	17	0.435531	0.389686
hsa-mir-382	18	18	0.412609	0.412609
hsa-mir-196b	17	17	0.389686	0.389686
hsa-mir-16-2	16	16	0.366763	0.366763
hsa-let-7d	15	4	0.343841	0.0916908
hsa-mir-29b-2	15	1	0.343841	0.0229227
hsa-mir-30d	14	13	0.320918	0.297995
hsa-mir-19a	13	13	0.297995	0.297995
hsa-mir-191	13	12	0.297995	0.275072
hsa-mir-146a	13	11	0.297995	0.25215
hsa-mir-23a	13	10	0.297995	0.229227
hsa-mir-1226	10	0	0.229227	0
hsa-mir-369	9	9	0.206304	0.206304
hsa-mir-876	9	9	0.206304	0.206304
hsa-mir-423	9	8	0.206304	0.183382
hsa-let-7a-3	9	1	0.206304	0.0229227
hsa-mir-6807	9	0	0.206304	0
hsa-mir-6892	9	0	0.206304	0
hsa-mir-122	8	8	0.183382	0.183382
hsa-mir-196a-2	8	8	0.183382	0.183382
hsa-mir-340	8	8	0.183382	0.183382
hsa-mir-30e	8	6	0.183382	0.137536
hsa-mir-98	8	1	0.183382	0.0229227
hsa-mir-136	7	7	0.160459	0.160459
hsa-mir-221	7	7	0.160459	0.160459
hsa-mir-432	7	7	0.160459	0.160459
hsa-mir-486-2	7	7	0.160459	0.160459
hsa-mir-508	7	7	0.160459	0.160459
hsa-mir-574	7	7	0.160459	0.160459
hsa-mir-15a	7	6	0.160459	0.137536
hsa-mir-103a-1	7	4	0.160459	0.0916908
hsa-mir-27a	7	0	0.160459	0
hsa-mir-29b-1	7	0	0.160459	0
hsa-mir-137	6	6	0.137536	0.137536
hsa-mir-15b	6	6	0.137536	0.137536
hsa-mir-187	6	6	0.137536	0.137536
hsa-mir-320a	6	6	0.137536	0.137536
hsa-mir-335	6	6	0.137536	0.137536
hsa-mir-449b	6	6	0.137536	0.137536
hsa-mir-590	6	6	0.137536	0.137536
hsa-mir-654	6	6	0.137536	0.137536
hsa-mir-767	6	6	0.137536	0.137536
hsa-mir-103a-2	6	4	0.137536	0.0916908
hsa-mir-30c-1	6	4	0.137536	0.0916908
hsa-mir-144	6	1	0.137536	0.0229227
hsa-mir-125a	5	5	0.114614	0.114614
hsa-mir-17	5	5	0.114614	0.114614
hsa-mir-182	5	5	0.114614	0.114614
hsa-mir-194-2	5	5	0.114614	0.114614
hsa-mir-196a-1	5	5	0.114614	0.114614
hsa-mir-302b	5	5	0.114614	0.114614
hsa-mir-30a	5	5	0.114614	0.114614
hsa-mir-323a	5	5	0.114614	0.114614
hsa-mir-34c	5	5	0.114614	0.114614
hsa-mir-376a-1	5	5	0.114614	0.114614
hsa-mir-505	5	5	0.114614	0.114614
hsa-mir-93	5	4	0.114614	0.0916908
hsa-mir-208a	5	1	0.114614	0.0229227
hsa-mir-6789	5	0	0.114614	0
hsa-mir-10a	4	4	0.0916908	0.0916908
hsa-mir-149	4	4	0.0916908	0.0916908
hsa-mir-154	4	4	0.0916908	0.0916908
hsa-mir-28	4	4	0.0916908	0.0916908
hsa-mir-375	4	4	0.0916908	0.0916908
hsa-mir-433	4	4	0.0916908	0.0916908
hsa-mir-491	4	4	0.0916908	0.0916908
hsa-mir-493	4	4	0.0916908	0.0916908
hsa-mir-548c	4	4	0.0916908	0.0916908
hsa-mir-589	4	4	0.0916908	0.0916908
hsa-mir-627	4	4	0.0916908	0.0916908
hsa-mir-653	4	4	0.0916908	0.0916908
hsa-mir-675	4	4	0.0916908	0.0916908
hsa-mir-7-2	4	4	0.0916908	0.0916908
hsa-mir-92a-1	4	4	0.0916908	0.0916908
hsa-let-7e	4	3	0.0916908	0.0687681
hsa-mir-503	4	3	0.0916908	0.0687681
hsa-mir-139	4	2	0.0916908	0.0458454
hsa-mir-23b	4	2	0.0916908	0.0458454
hsa-mir-6516	4	1	0.0916908	0.0229227
hsa-mir-1-1	3	3	0.0687681	0.0687681
hsa-mir-106a	3	3	0.0687681	0.0687681
hsa-mir-10b	3	3	0.0687681	0.0687681
hsa-mir-134	3	3	0.0687681	0.0687681
hsa-mir-183	3	3	0.0687681	0.0687681
hsa-mir-199b	3	3	0.0687681	0.0687681
hsa-mir-20b	3	3	0.0687681	0.0687681
hsa-mir-301a	3	3	0.0687681	0.0687681
hsa-mir-331	3	3	0.0687681	0.0687681
hsa-mir-337	3	3	0.0687681	0.0687681
hsa-mir-380	3	3	0.0687681	0.0687681
hsa-mir-452	3	3	0.0687681	0.0687681
hsa-mir-454	3	3	0.0687681	0.0687681
hsa-mir-509-1	3	3	0.0687681	0.0687681
hsa-mir-509-3	3	3	0.0687681	0.0687681
hsa-mir-511	3	3	0.0687681	0.0687681
hsa-mir-518f	3	3	0.0687681	0.0687681
hsa-mir-671	3	3	0.0687681	0.0687681
hsa-mir-92a-2	3	3	0.0687681	0.0687681
hsa-mir-99a	3	3	0.0687681	0.0687681
hsa-mir-26b	3	2	0.0687681	0.0458454
hsa-mir-27b	3	2	0.0687681	0.0458454
hsa-mir-30b	3	2	0.0687681	0.0458454
hsa-mir-7-1	3	2	0.0687681	0.0458454
hsa-mir-29c	3	0	0.0687681	0
hsa-mir-100	2	2	0.0458454	0.0458454
hsa-mir-130a	2	2	0.0458454	0.0458454
hsa-mir-132	2	2	0.0458454	0.0458454
hsa-mir-138-2	2	2	0.0458454	0.0458454
hsa-mir-146b	2	2	0.0458454	0.0458454
hsa-mir-152	2	2	0.0458454	0.0458454
hsa-mir-155	2	2	0.0458454	0.0458454
hsa-mir-185	2	2	0.0458454	0.0458454
hsa-mir-18b	2	2	0.0458454	0.0458454
hsa-mir-190b	2	2	0.0458454	0.0458454
hsa-mir-199a-1	2	2	0.0458454	0.0458454
hsa-mir-19b-1	2	2	0.0458454	0.0458454
hsa-mir-19b-2	2	2	0.0458454	0.0458454
hsa-mir-200a	2	2	0.0458454	0.0458454
hsa-mir-202	2	2	0.0458454	0.0458454
hsa-mir-20a	2	2	0.0458454	0.0458454
hsa-mir-22	2	2	0.0458454	0.0458454
hsa-mir-222	2	2	0.0458454	0.0458454
hsa-mir-24-1	2	2	0.0458454	0.0458454
hsa-mir-25	2	2	0.0458454	0.0458454
hsa-mir-302a	2	2	0.0458454	0.0458454
hsa-mir-30c-2	2	2	0.0458454	0.0458454
hsa-mir-31	2	2	0.0458454	0.0458454
hsa-mir-330	2	2	0.0458454	0.0458454
hsa-mir-338	2	2	0.0458454	0.0458454
hsa-mir-379	2	2	0.0458454	0.0458454
hsa-mir-450b	2	2	0.0458454	0.0458454
hsa-mir-485	2	2	0.0458454	0.0458454
hsa-mir-504	2	2	0.0458454	0.0458454
hsa-mir-509-2	2	2	0.0458454	0.0458454
hsa-mir-513a-1	2	2	0.0458454	0.0458454
hsa-mir-518c	2	2	0.0458454	0.0458454
hsa-mir-526b	2	2	0.0458454	0.0458454
hsa-mir-542	2	2	0.0458454	0.0458454
hsa-mir-545	2	2	0.0458454	0.0458454
hsa-mir-552	2	2	0.0458454	0.0458454
hsa-mir-570	2	2	0.0458454	0.0458454
hsa-mir-576	2	2	0.0458454	0.0458454
hsa-mir-580	2	2	0.0458454	0.0458454
hsa-mir-628	2	2	0.0458454	0.0458454
hsa-mir-642b	2	2	0.0458454	0.0458454
hsa-mir-651	2	2	0.0458454	0.0458454
hsa-mir-664a	2	2	0.0458454	0.0458454
hsa-mir-708	2	2	0.0458454	0.0458454
hsa-mir-9-2	2	2	0.0458454	0.0458454
hsa-let-7f-2	2	1	0.0458454	0.0229227
hsa-mir-101-2	2	1	0.0458454	0.0229227
hsa-mir-1273h	2	1	0.0458454	0.0229227
hsa-mir-500b	2	1	0.0458454	0.0229227
hsa-mir-1233-1	2	0	0.0458454	0
hsa-mir-324	2	0	0.0458454	0
hsa-mir-3620	2	0	0.0458454	0
hsa-mir-500a	2	0	0.0458454	0
hsa-mir-6765	2	0	0.0458454	0
hsa-mir-105-1	1	1	0.0229227	0.0229227
hsa-mir-106b	1	1	0.0229227	0.0229227
hsa-mir-125b-1	1	1	0.0229227	0.0229227
hsa-mir-125b-2	1	1	0.0229227	0.0229227
hsa-mir-129-1	1	1	0.0229227	0.0229227
hsa-mir-133a-2	1	1	0.0229227	0.0229227
hsa-mir-135a-1	1	1	0.0229227	0.0229227
hsa-mir-135b	1	1	0.0229227	0.0229227
hsa-mir-138-1	1	1	0.0229227	0.0229227
hsa-mir-148a	1	1	0.0229227	0.0229227
hsa-mir-153-2	1	1	0.0229227	0.0229227
hsa-mir-181b-2	1	1	0.0229227	0.0229227
hsa-mir-181c	1	1	0.0229227	0.0229227
hsa-mir-188	1	1	0.0229227	0.0229227
hsa-mir-18a	1	1	0.0229227	0.0229227
hsa-mir-1908	1	1	0.0229227	0.0229227
hsa-mir-190a	1	1	0.0229227	0.0229227
hsa-mir-193a	1	1	0.0229227	0.0229227
hsa-mir-197	1	1	0.0229227	0.0229227
hsa-mir-199a-2	1	1	0.0229227	0.0229227
hsa-mir-200b	1	1	0.0229227	0.0229227
hsa-mir-203a	1	1	0.0229227	0.0229227
hsa-mir-204	1	1	0.0229227	0.0229227
hsa-mir-205	1	1	0.0229227	0.0229227
hsa-mir-210	1	1	0.0229227	0.0229227
hsa-mir-212	1	1	0.0229227	0.0229227
hsa-mir-217	1	1	0.0229227	0.0229227
hsa-mir-24-2	1	1	0.0229227	0.0229227
hsa-mir-29a	1	1	0.0229227	0.0229227
hsa-mir-301b	1	1	0.0229227	0.0229227
hsa-mir-3173	1	1	0.0229227	0.0229227
hsa-mir-32	1	1	0.0229227	0.0229227
hsa-mir-345	1	1	0.0229227	0.0229227
hsa-mir-34a	1	1	0.0229227	0.0229227
hsa-mir-362	1	1	0.0229227	0.0229227
hsa-mir-370	1	1	0.0229227	0.0229227
hsa-mir-374b	1	1	0.0229227	0.0229227
hsa-mir-378a	1	1	0.0229227	0.0229227
hsa-mir-409	1	1	0.0229227	0.0229227
hsa-mir-411	1	1	0.0229227	0.0229227
hsa-mir-424	1	1	0.0229227	0.0229227
hsa-mir-450a-2	1	1	0.0229227	0.0229227
hsa-mir-455	1	1	0.0229227	0.0229227
hsa-mir-4667	1	1	0.0229227	0.0229227
hsa-mir-4713	1	1	0.0229227	0.0229227
hsa-mir-4804	1	1	0.0229227	0.0229227
hsa-mir-483	1	1	0.0229227	0.0229227
hsa-mir-488	1	1	0.0229227	0.0229227
hsa-mir-490	1	1	0.0229227	0.0229227
hsa-mir-494	1	1	0.0229227	0.0229227
hsa-mir-502	1	1	0.0229227	0.0229227
hsa-mir-513a-2	1	1	0.0229227	0.0229227
hsa-mir-516a-1	1	1	0.0229227	0.0229227
hsa-mir-516a-2	1	1	0.0229227	0.0229227
hsa-mir-517b	1	1	0.0229227	0.0229227
hsa-mir-518d	1	1	0.0229227	0.0229227
hsa-mir-519a-1	1	1	0.0229227	0.0229227
hsa-mir-520c	1	1	0.0229227	0.0229227
hsa-mir-520d	1	1	0.0229227	0.0229227
hsa-mir-548aq	1	1	0.0229227	0.0229227
hsa-mir-556	1	1	0.0229227	0.0229227
hsa-mir-582	1	1	0.0229227	0.0229227
hsa-mir-584	1	1	0.0229227	0.0229227
hsa-mir-598	1	1	0.0229227	0.0229227
hsa-mir-605	1	1	0.0229227	0.0229227
hsa-mir-616	1	1	0.0229227	0.0229227
hsa-mir-625	1	1	0.0229227	0.0229227
hsa-mir-629	1	1	0.0229227	0.0229227
hsa-mir-659	1	1	0.0229227	0.0229227
hsa-mir-660	1	1	0.0229227	0.0229227
hsa-mir-7110	1	1	0.0229227	0.0229227
hsa-mir-758	1	1	0.0229227	0.0229227
hsa-mir-885	1	1	0.0229227	0.0229227
hsa-mir-887	1	1	0.0229227	0.0229227
hsa-mir-9-1	1	1	0.0229227	0.0229227
hsa-mir-9-3	1	1	0.0229227	0.0229227
hsa-mir-96	1	1	0.0229227	0.0229227
hsa-mir-99b	1	1	0.0229227	0.0229227
hsa-mir-101-1	1	0	0.0229227	0
hsa-mir-1296	1	0	0.0229227	0
hsa-mir-140	1	0	0.0229227	0
hsa-mir-1909	1	0	0.0229227	0
hsa-mir-224	1	0	0.0229227	0
hsa-mir-365b	1	0	0.0229227	0
hsa-mir-4763	1	0	0.0229227	0
hsa-mir-548h-4	1	0	0.0229227	0
hsa-mir-6740	1	0	0.0229227	0
hsa-mir-766	1	0	0.0229227	0

## Sheet: tRNA fragments (CPM)
ID	Type	DNaseI_1	DNaseI_2	DNaseI_3	DNaseI_4	DNaseI_5	DNaseI_6	DNaseI_7	DNaseI_8	DNaseI_9	DNaseI_10	DNaseI_11	DNaseI_12	DNaseI_PNK1	DNaseI_PNK2	DNaseI_PNK3	DNaseI	Dnase I -3'P	Comments
AlaAGC	Full	2350.52	3193.79	1591.68	1249.02	1359.46	3799.87	2255.75	2323.66	1600.04	1607.65	3373.98	3754.54	205.905	2677	2182.95	2445.74	1411.93	CPM is calculated by number of reads * 1,000,000/total mapped reads in eacg database
AlaAGC	Other	534.696	647.54	260.234	251.695	216.27	368.63	293.908	319.814	158.49	186.259	587.788	560.89	23.7632	291.17	357.557	378.912	190.987
AlaAGC	tRF2	0	0	0	0	0	0	0	0	0	0	0	0	0	0	0	0	0
AlaAGC	tRF3	82.5999	90.4372	17.6644	52.3871	9.84445	11.494	8.81725	5.19419	6.79683	1.9625	40.6504	40.1343	0.38535	10.2458	34.395	31.5187	13.1994	DNase I (column T) is the combined dataset of DNaseI_1 to Dnase I_12 (column C to N)
AlaAGC	tRF5	87.2805	99.2199	22.7113	16.1494	10.1521	21.8934	13.2259	23.3739	10.1952	58.6967	28.1268	31.2156	7.57854	21.2063	27.5916	38.6248	17.0203
AlaAGC	tRH3	7654.53	9654.95	3410.48	5057.53	3583.07	3541.53	2888.39	3074.59	2052.64	860.469	6987.76	6167.56	77.4553	2375.83	3616.39	4659.34	1719.98
AlaAGC	tRH5	4.12999	10.9189	1.57717	3.15111	1.23056	2.46301	1.83693	2.96811	1.85368	0.535228	5.54323	5.69808	0.5138	5.95684	11.15	3.64471	5.09452	DNAse I -3'P (column U) is the combined dataset of DNaseI_PNK1 to Dnase I_PNK3 (column O to Q)
AlaCGC	Full	355.455	495.862	244.778	179.613	179.969	542.682	305.297	378.805	220.588	368.772	449.207	474.923	26.7176	341.446	288.578	364.884	183.403
AlaCGC	Other	223.02	248.999	77.597	99.6537	77.2174	94.1416	85.6008	112.788	64.8788	68.5092	171.84	166.483	7.19319	99.3601	111.311	128.207	61.4816
AlaCGC	tRF2	0	0.237368	0	0	0	0	0	0	0	0	0	0	0	0	0	0.0229227	0
AlaCGC	tRF3	160.244	197.965	23.9731	87.0493	28.3028	10.1257	7.34771	8.1623	9.57735	3.38978	41.6769	29.4814	0.12845	7.62475	28.9145	51.7136	10.768	Full: full length tRNA
AlaCGC	tRF5	16.52	22.0752	23.9731	12.9983	15.9972	14.5044	4.77601	8.90433	6.79683	5.7091	19.7093	13.3781	0.64225	11.9137	15.4966	13.937	7.93124	tRF2: internal tRNA frgaments contain anticodon loop
AlaCGC	tRH3	5216.46	6633.96	1495.16	2063.97	1591.42	1417.05	1247.64	1593.13	1037.13	789.997	2751.7	2288.15	44.4437	821.805	1370.7	2414.65	639.594
AlaCGC	tRH5	1.37666	2.84842	1.57717	0	1.23056	0.547335	0	0.371014	0.308947	0.356819	1.64244	1.48646	0.2569	1.19137	1.1339	1.05444	0.7526	tRF3: 3' tRNA fragments
AlaTGC	Full	3963.97	4854.65	2477.11	2139.99	1820.3	4551.64	2557.74	2991.85	2293.31	4023.67	3427.56	3592.52	274.112	2451.36	2156.3	3366.93	1379.69	tRF5: 5' tRNA fragments
AlaTGC	Other	486.513	591.047	219.543	218.608	196.889	255.605	210.512	293.101	169.921	191.433	326.64	300.76	9.63374	188.951	190.495	295.084	108.606	tRH3: 3' tRNA halves
AlaTGC	tRF2	0	0	0	0	0	0	0	0	0	0	0	0	0	0	0	0	0	tRH5: 5' tRNA halves
AlaTGC	tRF3	166.026	192.743	23.9731	92.5637	22.7653	10.673	9.18464	12.2435	11.74	2.49773	39.2132	34.684	0	6.90993	29.1034	52.2638	10.5943	Other: other fragments
AlaTGC	tRF5	24.78	33.9436	27.1274	18.9066	15.9972	17.5147	5.1434	15.9536	10.5042	10.3477	22.7888	18.0852	1.0276	17.6322	14.3627	18.7049	9.14698
AlaTGC	tRH3	3900.64	5005.14	1000.56	1513.71	1195.48	1000.53	905.973	1119.35	708.106	515.425	1943.42	1633.62	35.8375	561.611	1040.16	1754.37	471.243
AlaTGC	tRH5	8.25999	12.3431	3.15435	3.54499	3.99931	3.83134	3.30647	7.79129	3.70736	1.9625	11.4971	10.1575	0.12845	10.2458	9.63816	6.37251	5.49977
ArgACG	Full	2209	2493.31	1974.31	1657.09	1317	2834.37	2285.14	2536.99	1518.16	3447.94	3211.79	3469.89	196.657	2276.47	2109.43	2534.77	1287.93
ArgACG	Other	1175.12	1044.66	575.984	596.741	441.769	651.602	689.215	700.474	432.217	666.181	1037.61	914.171	23.7632	484.648	454.127	767.177	267.578
ArgACG	tRF2	0.550666	0.237368	0	0	0	0	0	0	0	0	0	0	0	0	0.188983	0.0687681	0.0578923
ArgACG	tRF3	38.5466	27.7721	13.5637	37.8133	8.30625	4.10501	6.24555	7.04926	3.08947	3.21137	32.4382	26.7562	0.64225	7.86303	21.7331	17.6046	8.85752
ArgACG	tRF5	0	0.237368	0	0	0.307639	0	0	0	0	0	0.41061	0	0	0.238274	0.188983	0.0916908	0.115785
ArgACG	tRH3	605.457	723.261	268.12	385.617	257.801	177.884	215.655	219.269	157.254	122.924	537.693	426.365	5.26645	115.324	202.212	350.236	92.3382
ArgACG	tRH5	1.10133	0.712104	0	0	0	0.547335	0	0.371014	0	0	1.23183	0.495486	0.38535	0	0.188983	0.412609	0.231569
ArgCCG	Full	3958.19	4063.98	2523.79	2232.95	1702.17	3754.44	2388.37	2590.79	2213.6	4181.38	3367.82	3547.43	279.635	2421.81	2281.22	3191.48	1413.27
ArgCCG	Other	543.232	573.956	254.871	236.727	215.04	298.571	271.498	263.049	195.254	339.156	469.122	419.924	11.6889	207.775	195.031	356.471	115.495
ArgCCG	tRF2	0	0.474736	0	0	0	0	0	0	0	0	0	0.247743	0	0	0.56695	0.0687681	0.173677
ArgCCG	tRF3	17.0706	21.6005	4.41609	16.9372	7.0757	3.28401	3.67386	1.48405	2.16263	1.9625	16.0138	14.8646	0.2569	3.33583	8.12629	9.51292	3.41564
ArgCCG	tRF5	0.275333	0	0	0	0	0	0	0	0	0	0	0.247743	0	0	0	0.0458454	0
ArgCCG	tRH3	536.624	643.505	164.972	267.844	198.735	128.076	138.872	169.182	128.522	161.461	347.786	309.183	7.19319	91.7353	140.415	276.769	68.5445
ArgCCG	tRH5	1.652	2.37368	0	0.787777	0.615278	0.821002	0.734771	0.371014	0.92684	0	0.41061	1.48646	0.12845	2.14446	2.64577	0.84814	1.38941
ArgCCT	Full	10362.2	9603.2	5825.14	5179.63	4735.49	7869.31	4881.82	4382.04	5238.19	7403.1	9094.39	9437.76	604.485	5601.33	5035.27	7330.63	3175.85
ArgCCT	Other	662.176	718.513	372.529	337.956	302.717	405.575	317.421	299.037	285.467	644.415	955.489	885.68	36.2229	346.688	349.997	558.672	207.775
ArgCCT	tRF2	0	0	0	0	0	0	0	0	0	0	0	0.247743	0	0.714821	0.377967	0.0229227	0.289461
ArgCCT	tRF3	6.05732	9.49472	1.57717	3.93888	1.53819	2.18934	0.734771	1.11304	1.23579	1.07046	5.33793	5.2026	0	2.14446	4.15764	3.48425	1.79466
ArgCCT	tRF5	0.550666	0	0	0	0	0	0	0	0	0	0	0	0	0	0	0.0458454	0
ArgCCT	tRH3	924.843	1070.77	333.099	428.55	360.245	298.845	317.054	267.501	281.142	251.736	731.296	630.753	16.3131	176.084	234.528	510.947	121.979
ArgCCT	tRH5	0.275333	2.13631	0.315435	0.393888	0.922917	0.273667	0.734771	0	0	0.178409	1.23183	0.743228	0	0.238274	0.755934	0.641836	0.289461
ArgTCG	Full	1443.3	1930.75	931.164	735.783	655.579	1730.95	1089.67	1282.59	899.035	1601.05	1493.8	1618.26	136.542	1058.65	1010.12	1347.1	628.189
ArgTCG	Other	898.136	970.123	413.535	397.827	314.715	594.406	468.784	521.645	329.646	533.266	791.245	700.617	29.0297	355.981	359.635	602.523	209.744
ArgTCG	tRF2	0.550666	0.237368	0.315435	0	0	0.273667	0	0	0	0.178409	0	0.495486	0	0.476547	0.755934	0.183382	0.347354
ArgTCG	tRF3	17.8966	13.7673	5.04696	10.2411	6.15278	4.37868	2.5717	2.96811	2.78052	1.78409	11.9077	12.1394	0	3.5741	8.50425	7.83956	3.47354
ArgTCG	tRF5	0.275333	0	0	0	0	0	0	0	0	0	0	0	0	0	0.188983	0.0229227	0.0578923
ArgTCG	tRH3	387.669	501.084	113.241	169.766	141.822	108.099	101.031	106.852	80.0172	64.4058	303.851	265.58	5.78025	81.7278	147.974	204.012	67.7919
ArgTCG	tRH5	0.275333	0	0	0	0	0	0	0	0	0	0	0.247743	0	0	0.944917	0.0458454	0.289461
ArgTCT	Full	7642.69	6993.58	4200.96	4020.81	3430.17	7296.52	3634.55	3736.11	3581.31	5848.08	9887.07	10545.9	268.717	6613.52	5307.6	6272.09	3353.87
ArgTCT	Other	611.239	657.984	311.334	318.262	319.022	393.26	258.272	295.327	240.052	351.645	980.946	948.607	12.0743	451.29	428.236	506.936	246.274
ArgTCT	tRF2	0	0	0	0	0	0	0	0	0	0	0	0.247743	0	0	0.56695	0.0229227	0.173677
ArgTCT	tRF3	9.63665	9.49472	1.57717	7.87777	3.69167	2.18934	1.83693	0.742027	2.16263	1.78409	13.1395	12.3871	0	4.5272	9.0712	5.91406	3.87878
ArgTCT	tRF5	0.825999	0	0	0	0	0	0	0	0	0	0	0	0	0	0	0.0687681	0
ArgTCT	tRH3	797.639	923.837	291.146	330.866	263.647	315.265	310.441	298.666	228.93	229.435	795.556	647.847	9.24839	225.407	304.074	475.142	152.083
ArgTCT	tRH5	0.825999	4.03526	0	1.57555	1.53819	0.821002	0	1.11304	0	1.42728	2.46366	3.22066	0.2569	0.714821	0.56695	1.55874	0.463138
AsnGTT	Full	6266.03	7668.18	4535.64	3932.19	3758.12	7576.48	5146.7	5492.49	3951.74	5600.81	10253.3	11093.7	572.244	7830.62	6815.5	6579.82	4248.31
AsnGTT	Other	9295.79	10096.2	5289.21	4652.21	4125.44	6667.91	5350.24	5335.92	3425.91	3148.03	8725.46	8120.02	219.007	4615.84	4534.28	6317.61	2609.2
AsnGTT	tRF2	2.20266	7.35841	1.89261	2.36333	2.15347	0	1.46954	1.48405	0.92684	0.178409	2.66896	2.47743	0	1.42964	2.83475	2.13181	1.21574
AsnGTT	tRF3	155.563	303.831	37.2213	125.256	23.6882	28.1877	11.7563	15.5826	11.1221	3.92501	67.5453	78.5345	0.38535	26.4484	98.2714	74.2466	36.7037
AsnGTT	tRF5	0	0	0	0	0	0	0	0	0	0	0	0	0	0	0	0	0
AsnGTT	tRH3	123.349	183.96	32.4898	46.0849	36.609	40.2291	29.0235	31.5362	25.0247	14.0943	101.831	88.1964	1.41295	29.5459	36.4738	66.132	18.9887
AsnGTT	tRH5	0.275333	1.89894	0	1.18166	0.922917	0.273667	0	0.742027	0.617894	0.356819	0.821219	0.990971	0	0.714821	0.755934	0.687681	0.405246
AspGTC	Full	23648.1	21010.9	20741.1	20173	15775.7	25764.1	18006.7	17161.2	16019.8	14954.1	22878.1	22257.5	1173.65	15498.3	11801.3	19920.1	7909.65
AspGTC	Other	1560.31	1540.99	851.674	852.768	853.698	1105.34	765.264	747.964	631.178	626.752	2428.76	2257.43	30.828	1141.09	1068.13	1247.8	618.347
AspGTC	tRF2	0.275333	0.474736	0	0.393888	0.307639	0	0.367386	0.371014	0	0	0	0	0	0.476547	0.188983	0.160459	0.173677
AspGTC	tRF3	57.5446	67.6499	10.0939	41.3583	16.9201	9.57836	8.08248	8.1623	7.10578	6.24433	36.7496	37.6569	0.12845	17.1557	37.7967	26.4528	15.8046
AspGTC	tRF5	0	0.237368	0	0	0	0	0	0	0	0	0	0	0	0	0	0.0229227	0
AspGTC	tRH3	1000.84	1521.77	658.628	749.175	833.086	389.976	333.219	550.213	256.426	98.6604	1197.34	1097.75	4.8811	161.788	284.987	738.226	128.81
AspGTC	tRH5	11.0133	15.4289	3.15435	2.36333	4.30694	3.28401	2.20431	5.93622	0.308947	1.07046	9.85463	6.44131	0.899149	5.24202	8.50425	5.73068	4.28403
CysGCA	Full	1348.31	1697.89	812.56	602.255	542.983	1310.59	1003.33	1015.84	726.025	1313.99	1026.11	1044.24	108.926	723.16	623.456	1079.8	415.782
CysGCA	Other	495.324	568.022	259.918	237.121	197.504	257.247	254.966	292.359	167.758	230.148	443.048	392.672	20.1666	251.14	265.9	326.832	151.562
CysGCA	tRF2	0	0	0	0.393888	0	0	0	0	0	0	0	0	0	0.238274	0	0.0229227	0.0578923
CysGCA	tRF3	41.5753	34.6557	7.57044	25.6027	10.1521	2.18934	5.51078	2.96811	2.78052	3.21137	12.5236	8.17551	0	1.90619	6.8034	13.0889	2.54726
CysGCA	tRF5	42.6766	49.1352	43.8455	31.1172	31.0715	18.062	13.2259	53.055	15.4473	75.824	35.9283	30.7201	3.5966	50.2757	56.1281	38.9686	31.0303
CysGCA	tRH3	476.326	604.102	176.959	261.936	191.659	63.2172	146.587	147.292	85.8872	60.124	256.015	207.113	8.22079	55.9943	111.878	225.766	51.582
CysGCA	tRH5	15.1433	35.3678	7.88587	5.51444	5.22986	9.57836	5.51078	19.6637	6.79683	3.7466	15.1926	14.1213	0.770699	14.0581	27.7806	12.3095	12.2732
GlnCTG	Full	18681.3	17791.5	15238.7	14020.8	10018.9	20439.9	14613.9	15463.5	10950	21414.5	17213.2	16722.4	1525.98	12015.4	10153.3	16555.6	6717.41
GlnCTG	Other	1767.64	1849.57	1054.81	929.182	777.711	1363.41	1021.7	1054.05	776.383	1111.31	1786.77	1632.13	56.518	868.031	812.251	1308.43	485.195
GlnCTG	tRF2	0	0	0	0	0	0	0	0	0	0	0.205305	0	0	0.238274	0	0.0229227	0.0578923
GlnCTG	tRF3	25.606	37.5042	12.6174	42.9338	13.2285	2.73667	3.67386	6.30723	3.39842	3.21137	12.9342	10.6529	0	4.05065	7.37035	14.0975	3.24197
GlnCTG	tRF5	0.275333	0	0	0	0	0	0.734771	0.371014	0	0	0.41061	0.495486	0	0.238274	0.377967	0.183382	0.173677
GlnCTG	tRH3	181.72	182.061	58.9863	89.4126	60.9125	47.8918	55.1078	52.684	32.4394	26.7614	172.661	162.519	1.41295	49.3226	76.5383	97.6049	36.0669
GlnCTG	tRH5	14.042	16.6158	1.26174	4.33277	6.76806	3.28401	1.83693	5.19419	2.47157	3.7466	12.113	10.1575	0.12845	5.24202	7.9373	7.28942	3.763
GlnTTG	Full	5498.12	5263.64	3353.7	2793.46	2161.78	5418.61	3411.17	3319.09	3236.22	5118.92	5536.25	5378.74	268.203	3459.49	3071.36	4418.81	1902.28
GlnTTG	Other	535.522	550.931	300.925	294.235	208.887	413.785	309.706	306.457	244.686	354.321	724.931	649.334	18.2399	281.163	276.861	429.961	161.346
GlnTTG	tRF2	0	0.237368	0	0	0	0	0	0	0	0.178409	0	0	0	0	0.56695	0.0458454	0.173677
GlnTTG	tRF3	6.60799	8.54525	2.83891	9.05943	1.53819	0.547335	1.83693	1.48405	0	0.713638	3.28488	3.22066	0	0.953094	1.88983	3.2321	0.810492
GlnTTG	tRF5	0	0	0	0	0	0	0	0	0	0	0.205305	0.247743	0	0.238274	0	0.0458454	0.0578923
GlnTTG	tRH3	76.2672	102.543	24.6039	46.0849	29.5333	36.9451	29.0235	26.342	17.301	11.2398	124.209	108.759	1.66985	28.3546	55.7501	56.1148	24.72
GlnTTG	tRH5	2.478	3.56052	0.946305	0	1.23056	1.09467	0	2.22608	0.308947	0.892047	3.49018	2.47743	0.2569	2.14446	1.1339	1.69628	0.984169
GluCTC	Full	12602	10791	12290.9	10708.2	9610.02	12326	11690.6	11593.8	8334.46	11950.4	10901.5	10883.3	1211.15	7423.41	5429.12	11179.8	4012.63
GluCTC	Other	1783.88	1465.99	1416.3	1243.51	1213.33	1213.44	1341.32	1352.35	961.134	1590.88	2051	1831.56	88.502	976.445	770.485	1498.85	513.157
GluCTC	tRF2	0.825999	0	0	0.393888	0	0	0	0	0	0.356819	1.23183	0	0	0.238274	0.188983	0.275072	0.115785
GluCTC	tRF3	890.151	970.836	492.078	1429.03	449.46	226.323	199.858	193.669	177.335	61.7297	618.378	607.465	10.6613	207.775	654.639	510.007	255.826
GluCTC	tRF5	0.275333	0.712104	0	0.393888	0	0	0	0.371014	0.308947	0	0	0	0	0	0	0.160459	0
GluCTC	tRH3	124.175	134.113	55.832	80.3532	64.9118	53.0915	49.5971	76.4288	29.9678	26.2262	110.454	97.8584	2.0552	28.5928	32.5052	76.1034	17.8308
GluCTC	tRH5	55.8926	84.9778	11.6711	16.5433	21.8424	8.21002	22.4105	26.713	13.2847	13.0239	40.4451	38.8956	1.66985	10.2458	17.3865	30.8081	8.56806
GluTTC	Full	6500.33	5379	4657.71	3834.5	3504.01	6806.11	4663.59	4513.75	3547.02	4785.66	6552.92	6601.85	330.887	4144.77	3180.97	5243.84	2130.61
GluTTC	Other	726.879	629.025	481.354	452.184	418.697	514.495	421.024	473.043	340.459	482.062	944.402	881.964	27.1029	394.819	367.384	586.592	220.685
GluTTC	tRF2	0	0	0	0	0	0	0	0	0	0	0	0	0	0	0.188983	0	0.0578923
GluTTC	tRF3	1336.47	1447	568.729	1540.5	512.834	255.058	226.677	194.04	178.262	64.4058	752.237	719.693	10.5329	248.043	788.25	639.773	306.482
GluTTC	tRF5	0	0	0	0	0	0	0	0	0	0	0	0.247743	0.5138	0	0	0.0229227	0.231569
GluTTC	tRH3	192.733	217.667	95.5768	131.165	135.053	81.5529	76.7836	98.3186	43.8704	32.6489	257.247	209.59	2.569	52.1819	79.562	134.969	38.2089
GluTTC	tRH5	2.478	2.84842	0.315435	0.393888	0.922917	0.547335	1.83693	2.22608	2.16263	0.178409	1.64244	2.47743	0.770699	2.62101	1.51187	1.48998	1.44731
GlyCCC	Full	11446.7	9351.59	9759.87	9849.96	9176.56	12096.4	10314.3	9174.8	8453.71	8229.31	11098	12606.6	1543.97	9069.41	6683.78	10136.1	4946.89
GlyCCC	Other	639.598	582.027	345.401	335.199	343.325	417.616	351.221	398.84	311.418	378.763	871.724	863.631	21.3227	452.005	325.24	510.191	219.064
GlyCCC	tRF2	0.275333	0	0	0	0	0	0	0	0	0	0	0	0	0	0	0.0229227	0
GlyCCC	tRF3	52.0379	64.0894	12.302	40.1766	23.3806	11.2204	6.61294	5.56521	10.1952	2.67614	21.1464	25.5175	0.2569	5.24202	24.0009	23.0144	8.74173
GlyCCC	tRF5	1.10133	2.13631	0	0.787777	0.922917	0	0	0	0	0	0	0.247743	0.12845	0.238274	0.188983	0.435531	0.173677
GlyCCC	tRH3	61.1239	77.382	27.7583	39.7827	36.609	24.3564	25.717	25.971	17.9189	18.9114	64.0551	55.4944	1.92675	16.4409	16.6305	40.917	9.95747
GlyCCC	tRH5	101.047	192.031	28.3891	36.2377	30.7639	33.3874	24.6148	57.8781	16.9921	11.4182	75.3469	67.8815	8.09234	92.9267	188.228	58.7509	83.8859
GlyGCC	Full	27192.7	24651.2	23405.3	21603.2	18165.8	26654.1	20428.1	19571.7	19119.2	24477.6	23310.9	25794.2	3945.98	16537.1	12613.9	23225.4	9660.48
GlyGCC	Other	1993.41	1984.4	1288.55	1059.17	1045.66	1233.97	920.668	1095.6	813.148	1083.48	1809.76	1787.71	69.4914	879.229	759.335	1386.3	477.553
GlyGCC	tRF2	0	0.237368	0	0	0	0	0	0	0	0	0.205305	0	0	0	0	0.0458454	0
GlyGCC	tRF3	210.354	259.443	38.4831	146.526	61.5278	29.5561	18.3693	20.7768	27.4963	10.3477	67.5453	75.5615	2.0552	21.2063	75.7824	81.2839	29.2935
GlyGCC	tRF5	2.478	1.42421	0	0.787777	0	0	0	0	0	0	0	1.48646	0	0.238274	0.377967	0.527222	0.173677
GlyGCC	tRH3	278.362	348.931	200.617	189.854	254.417	151.612	108.379	137.646	96.0825	60.124	431.961	397.379	2.3121	53.3733	87.4993	229.273	40.8141
GlyGCC	tRH5	123.624	208.884	16.7181	33.0866	37.2243	40.7764	35.269	30.7941	29.3499	15.1648	104.705	90.9216	5.9087	47.1782	82.0188	68.1263	39.251
GlyTCC	Full	21476	18155.1	14681.3	14441.5	10650.2	20721	13760.4	13271.9	13015	18814.3	15615.7	16639.6	1595.6	10428.8	8311.49	16322.4	5799.07
GlyTCC	Other	1311.14	1299.35	886.688	742.086	791.863	998.065	875.48	1029.56	753.521	924.339	1619.44	1520.15	36.4798	650.01	547.863	1099.24	342.201
GlyTCC	tRF2	0	0.237368	0	0	0.615278	0	0	0.371014	0	0	0	0	0	0.238274	0.377967	0.0916908	0.173677
GlyTCC	tRF3	47.6326	71.6852	5.99326	40.9644	9.84445	7.38902	5.87817	7.42027	6.48788	4.63865	19.0933	19.8194	0.12845	4.5272	17.1975	20.9284	6.42604
GlyTCC	tRF5	0.550666	1.18684	0.63087	1.57555	0.615278	0	0.367386	0.371014	0.308947	0	1.23183	0.495486	0.2569	0	0.188983	0.59599	0.173677
GlyTCC	tRH3	62.5006	78.0941	34.3824	50.0238	41.8389	22.1671	23.8801	28.197	11.1221	25.3341	73.0885	54.0079	0.5138	10.0075	18.7094	43.599	8.39438
GlyTCC	tRH5	26.9826	36.7921	5.04696	7.48388	9.84445	6.02068	8.81725	14.4695	5.86999	6.95797	15.8085	14.3691	2.569	15.0112	26.2687	13.7078	12.8521
HisGTG	Full	4330.99	4245.57	3090.63	2921.47	1663.71	4617.04	2718.65	2792.25	2004.45	4712.69	5142.48	5618.56	176.233	3712.06	3091.01	3866.28	1928.22
HisGTG	Other	508.815	559.477	246.039	237.515	169.201	323.748	209.042	212.962	153.856	356.997	897.593	880.973	10.1475	395.772	404.992	433.033	224.796
HisGTG	tRF2	0	0	0	0	0	0	0	0	0	0	0	0	0	0.476547	0.188983	0	0.173677
HisGTG	tRF3	22.302	26.1105	5.36239	9.05943	3.38403	3.28401	1.46954	1.85507	2.16263	0	9.85463	13.8736	0	3.81238	13.0399	8.57309	4.92084
HisGTG	tRF5	0.550666	0	0.315435	0	0.307639	0	0	0	0	0.178409	0	0	0	0.238274	0.188983	0.114614	0.115785
HisGTG	tRH3	6206.55	8228.6	2162.62	3825.44	1459.13	2019.67	749.099	848.879	870.612	769.123	7974.45	7390.91	23.3779	2249.78	5790.64	3805.86	2331.03
HisGTG	tRH5	23.6786	44.3878	5.36239	11.8166	11.075	14.5044	11.389	7.79129	10.5042	5.53069	48.8625	51.2828	0.5138	10.7223	10.3941	22.2579	6.0208
IleAAT	Full	3690.01	4937.02	2925.97	2336.94	1770.77	3948.2	2219.74	2519.18	1931.54	6879.83	5610.37	5728.56	325.492	3472.84	3307.97	4073.11	2003.83
IleAAT	Other	19932.2	20893.4	7776.1	8541.47	5545.19	8512.7	4370.79	4828	4388.28	6269.13	14147.4	12167.4	222.604	5407.86	6645.79	10273	3450.09
IleAAT	tRF2	2.75333	6.17157	0.315435	0.393888	0	1.36834	0.367386	0	0.617894	0.178409	2.87427	1.7342	0	0.476547	0.755934	1.55874	0.347354
IleAAT	tRF3	53.4146	64.5641	17.3489	50.8116	9.84445	7.11535	2.20431	4.08115	4.94315	3.7466	26.6896	23.5356	0.12845	7.38648	20.5992	22.6247	8.16281
IleAAT	tRF5	0.550666	0	0.315435	0	0	0	0	0.371014	0	0	0.41061	0	0	0	0	0.137536	0
IleAAT	tRH3	123.624	158.087	41.6374	54.7505	51.0681	31.7454	23.5127	25.971	20.0815	7.31479	109.222	110.246	3.3397	23.3508	50.8365	66.132	22.7517
IleAAT	tRH5	0.825999	1.66158	0.63087	0	1.23056	0.547335	0.367386	0.742027	0.92684	0.535228	2.46366	1.7342	0.770699	1.42964	2.64577	1.05444	1.5052
IleGAT	Full	28.3593	42.7263	25.8657	24.4211	19.0736	34.4821	18.3693	23.7449	16.3742	87.2422	75.7575	71.5977	2.0552	50.9905	46.6789	44.2179	27.6146
IleGAT	Other	46.8066	44.1505	19.8724	20.4822	19.3813	17.5147	12.8585	12.9855	9.8863	14.6296	67.1347	62.4312	0.5138	21.2063	30.0484	31.1978	14.5889
IleGAT	tRF2	1.37666	2.37368	0	1.18166	0.615278	0	0	0	0	0	1.23183	1.48646	0	0.476547	1.1339	0.733526	0.463138
IleGAT	tRF3	0	0	0	0	0	0	0	0	0	0	0	0	0	0	0	0	0
IleGAT	tRF5	0	0	0	0	0	0	0	0	0	0	0	0	0	0	0	0	0
IleGAT	tRH3	0	0	0.315435	0	0	0	0	0	0	0	0	0.247743	0	0.238274	0	0.0458454	0.0578923
IleGAT	tRH5	0	0	0	0	0	0	0	0	0	0	0	0	0	0	0	0	0
IleTAT	Full	336.457	504.407	234.999	200.095	251.033	494.791	359.67	440.393	233.255	331.842	571.158	655.032	70.519	386.956	355.478	399.566	234.695
IleTAT	Other	3204.6	3326	1455.1	1413.67	1317	1812.23	1533.83	1473.67	1272.86	1032.28	3045.29	2889.42	90.0434	1227.11	1468.21	2047.11	788.493
IleTAT	tRF2	0.825999	0.949472	0	0	0	0	0.367386	0	0	0.356819	0.821219	0.990971	0	0	1.32288	0.412609	0.405246
IleTAT	tRF3	63.6019	86.1646	17.0335	66.1732	18.1507	9.03102	4.40863	4.82318	7.41472	2.31932	36.1337	36.6659	0.12845	9.05439	28.1585	29.662	10.8837
IleTAT	tRF5	0	0	0	0	0	0	0	0	0	0	0	0	0	0	0	0	0
IleTAT	tRH3	55.8926	79.7557	30.9126	26.3905	34.1479	22.4407	26.4518	24.1159	23.171	11.0614	67.7506	54.5034	1.0276	20.9681	25.5128	39.45	13.3731
IleTAT	tRH5	0	1.18684	0.946305	0	0.307639	0.273667	0	0	0.308947	1.07046	2.66896	1.23871	0	1.90619	0.944917	0.802295	0.7526
iMetCAT	Full	25382.1	22755.3	23360.2	22888.8	14741.1	26977.6	17352.7	16339.1	17819.1	18495.7	19992.6	19402.2	1768.76	11816.9	11326.5	20516.5	7138
iMetCAT	Other	4750.87	4724.1	2214.35	2200.65	1819.68	2778.27	1535.67	1432.48	1666.77	1604.08	3239.92	3011.81	145.02	1303.12	1681.01	2663.53	896.925
iMetCAT	tRF2	1.10133	0.949472	0	0	0.307639	0	0	0	0	0	0.821219	0.247743	0	0.476547	0.188983	0.320918	0.173677
iMetCAT	tRF3	51.4873	64.8015	10.0939	42.5399	10.4597	8.48369	6.98033	5.93622	7.41472	3.21137	25.0472	24.7743	0.38535	11.6754	25.7017	22.0975	10.8837
iMetCAT	tRF5	0	0	0	0.393888	0	0	0	0	0	0	0	0	0	0	0.188983	0.0229227	0.0578923
iMetCAT	tRH3	56.4432	103.255	16.4026	18.5127	11.3826	21.6197	14.328	16.3246	8.95946	3.03296	36.339	36.4182	0.64225	10.0075	10.3941	29.9829	5.90501
iMetCAT	tRH5	35.7933	72.6346	11.0402	17.3311	11.075	6.29435	5.87817	8.90433	2.16263	1.60569	19.2987	14.8646	1.66985	11.9137	34.773	17.9714	14.2994
LeuAAG	Full	7131.95	7555.19	7070.79	5478.2	4703.8	8177.45	5776.77	5987.42	4590.33	8480.87	7629.95	8189.63	1305.31	5884.88	5035.09	6961.72	3560.55
LeuAAG	Other	7799.36	6555.16	3936.31	3377.59	2811.51	3588.87	3024.32	2766.28	2771.87	3272.03	5489.85	4820.33	168.526	2538.57	2224.9	4319.71	1374.3
LeuAAG	tRF2	7.98465	6.40894	1.89261	4.33277	5.22986	1.91567	2.93908	2.22608	0.92684	1.60569	11.9077	8.42325	0	2.38274	3.59069	4.92838	1.67888
LeuAAG	tRF3	28.6346	30.1457	7.88587	18.5127	7.69097	4.92601	1.10216	2.5971	2.16263	0.892047	10.6759	11.8917	0.12845	2.85928	13.2288	10.7278	4.80506
LeuAAG	tRF5	1.92733	1.66158	1.26174	1.18166	2.46111	0.273667	0.734771	0	0.617894	0	1.23183	0.743228	0.12845	0	0.755934	0.985676	0.289461
LeuAAG	tRH3	734.864	559.714	254.556	222.941	226.115	235.354	192.877	187.733	162.506	151.113	432.783	368.146	9.37684	150.351	150.431	320.757	86.8384
LeuAAG	tRH5	5.23133	7.59578	2.20804	1.96944	2.76875	1.09467	1.46954	0.371014	0.92684	0.892047	4.1061	2.72517	0.2569	2.38274	2.64577	2.75072	1.5052
LeuCAA	Full	4615.41	4696.33	4146.08	3723.43	2980.71	6510.55	4112.15	4347.17	3331.37	6341.74	5169.17	5659.93	672.949	3632.96	3067.58	4811.18	2125.69
LeuCAA	Other	5465.63	5285.24	2396.36	3279.51	1825.53	2065.37	1516.57	1676.61	1512.91	2149.12	2702.02	2479.41	103.017	1069.61	1424.37	2757.14	742.642
LeuCAA	tRF2	2.75333	1.66158	1.26174	2.36333	0.615278	0.821002	0.367386	0.371014	0.617894	0.356819	1.23183	1.23871	0	0.714821	0.56695	1.12321	0.347354
LeuCAA	tRF3	82.3245	109.664	15.4563	72.8693	23.9958	9.03102	8.81725	5.19419	6.79683	6.42274	26.0737	32.702	1.15605	12.3902	32.8831	33.4901	13.6047
LeuCAA	tRF5	0	0.237368	0	0.787777	0.307639	0	0	0	0	0	0	0.990971	0	0.238274	0.56695	0.183382	0.231569
LeuCAA	tRH3	1421.54	1092.37	1513.77	1837.49	1245.01	1510.64	1063.21	1082.99	1106.03	2427.26	2093.7	1832.31	101.861	950.473	1133.33	1590.56	624.021
LeuCAA	tRH5	9.63665	9.25736	9.77848	7.48388	1.84583	4.65235	1.10216	25.2289	41.0899	10.3477	40.8557	42.1163	0.899149	24.3039	24.3789	17.8339	13.7784
LeuCAG	Full	8896.83	9005.75	8257.14	7321.2	6146.63	11240.1	9433.36	9421.15	6070.5	10528.8	7988.62	8938.31	1977.61	6747.67	5341.05	8728.8	4166.91
LeuCAG	Other	9653.45	8573.74	4899.97	5728.32	3973.77	4801.22	4238.89	3837.02	3344.04	4554.97	6693.55	6107.11	252.019	3211.21	3113.69	5666.68	1847.63
LeuCAG	tRF2	10.1873	9.49472	3.46978	7.87777	4.92222	1.36834	2.20431	0.742027	2.47157	1.60569	15.6032	14.8646	0	2.85928	4.91357	6.64758	2.19991
LeuCAG	tRF3	65.5292	77.382	11.3557	38.9949	11.075	9.30469	4.40863	5.19419	4.94315	3.38978	21.9676	21.8014	0.64225	9.53094	28.3475	23.4958	11.289
LeuCAG	tRF5	1.92733	3.32315	0.63087	2.75722	1.84583	1.09467	0	0	1.23579	0	1.23183	0.247743	0	0	0.755934	1.16906	0.231569
LeuCAG	tRH3	9557.08	8530.77	6262.33	7883.28	5423.98	6932.54	4307.96	4467.01	4619.99	4327.32	9656.72	9383.5	394.084	5246.78	6927	6908.15	3574.38
LeuCAG	tRH5	8.53532	14.9542	2.52348	5.51444	7.38333	4.65235	5.51078	4.08115	3.39842	2.31932	13.7554	10.6529	0.770699	11.9137	13.4178	7.2665	7.35232
LeuTAA	Full	41.0246	39.4031	32.1744	23.6333	26.7646	58.0175	57.3121	44.8927	26.2605	41.391	26.279	33.9408	4.3673	16.2026	11.339	37.4786	9.37855
LeuTAA	Other	795.987	573.956	397.763	407.674	367.321	577.985	455.925	422.585	367.956	318.818	548.78	564.606	42.0031	307.849	314.846	486.443	190.176
LeuTAA	tRF2	3.30399	3.56052	0.63087	3.54499	2.15347	1.09467	0.367386	0.742027	0.308947	0.713638	3.07957	2.97291	0	1.19137	2.83475	1.92551	1.15785
LeuTAA	tRF3	27.8086	34.181	9.14761	27.1783	7.69097	1.91567	2.5717	4.08115	1.85368	0.892047	9.85463	7.92777	0	1.90619	7.74832	11.0946	2.83672
LeuTAA	tRF5	0	0	0	0	0	0	0	0	0	0	0	0.247743	0	0	0	0.0229227	0
LeuTAA	tRH3	143.448	148.592	73.8118	66.961	68.9111	79.0899	91.8464	96.4636	67.3504	33.8978	78.4264	91.1693	4.3673	31.6904	37.0408	85.5475	21.0149
LeuTAA	tRH5	0	0	0	0	0	0	0	0	0	0	0	0.247743	0	0	0.377967	0.0229227	0.115785
LeuTAG	Full	6410.03	6500.8	5605.59	4714.84	3975.31	7257.38	4910.48	5070.64	4013.22	7797.74	6091.39	6627.37	1026.83	4714.24	4131.93	5959.93	2873.95
LeuTAG	Other	6192.79	5068.05	2896.64	2563.42	2065.49	3016.36	2372.94	2134.81	2196.3	2855.8	4062.78	3642.07	124.083	1914.05	1657.2	3371.68	1028.63
LeuTAG	tRF2	9.36132	10.4442	2.20804	5.51444	3.69167	0	1.83693	0.742027	1.85368	2.14091	12.9342	8.671	0.2569	3.5741	2.64577	5.36391	1.79466
LeuTAG	tRF3	39.6479	44.1505	5.99326	17.3311	6.76806	3.01034	0.367386	1.85507	3.39842	1.07046	14.166	9.90971	0	5.71857	12.6619	12.7909	5.2682
LeuTAG	tRF5	0.550666	1.42421	0.63087	1.57555	0.615278	0	0.367386	0.371014	0	0	0.41061	0.247743	0	0	0.188983	0.481377	0.0578923
LeuTAG	tRH3	501.657	428.687	150.778	145.345	150.435	175.694	129.32	168.069	108.44	119.713	349.224	333.709	7.96389	141.534	154.21	240.253	85.2174
LeuTAG	tRH5	2.75333	1.66158	0.315435	0.787777	1.84583	1.09467	0.367386	1.48405	0.308947	0.356819	2.25835	3.22066	0.2569	0.714821	0.944917	1.42121	0.578923
LysCTT	Full	13349.2	11840.2	9244.14	8138.52	6471.18	12554.2	7320.52	7009.93	6965.21	10051.6	13075.9	14077.7	582.392	8403.43	6568.69	10394.6	4316.45
LysCTT	Other	1794.62	1778.84	1170.89	1032.78	824.472	1617.65	774.081	923.082	773.912	1487.93	3648.88	3488.96	56.3895	2535.23	2463.78	1747.47	1396.13
LysCTT	tRF2	1.652	0	0	0	0	0	0.367386	0	0	0	0.821219	1.7342	0	1.66791	0.944917	0.412609	0.694707
LysCTT	tRF3	314.43	342.285	78.2279	230.031	69.834	36.3978	26.8191	20.7768	25.0247	11.0614	146.382	124.615	0.899149	45.7485	140.982	120.665	54.7082
LysCTT	tRF5	0	1.42421	0	0	0.307639	0	0	0	0.308947	0	0.205305	0.247743	0	0	0.188983	0.229227	0.0578923
LysCTT	tRH3	79.5712	98.7451	24.9194	35.8438	36.9167	26.2721	29.3908	28.9391	15.4473	16.2353	95.8774	75.3138	1.0276	19.0619	24.1899	49.536	12.5047
LysCTT	tRH5	11.0133	14.7168	5.99326	9.84721	12.6132	4.10501	4.04124	5.93622	1.54473	1.24887	11.4971	9.90971	0.2569	5.00374	7.74832	7.72495	3.70511
LysTTT	Full	79.5712	83.3162	74.7581	57.5077	43.0694	144.223	68.3337	59.7332	50.3583	59.0535	265.87	277.967	3.98195	109.844	85.9875	113.422	54.824
LysTTT	Other	863.719	966.326	91.7916	78.3838	57.8361	85.9316	275.172	313.136	222.133	183.048	198.94	174.163	8.99149	111.512	116.225	302.809	66.7498
LysTTT	tRF2	0	0	0	0	0	0	0	0	0	0	0	0.495486	0	0	0.188983	0.0458454	0.0578923
LysTTT	tRF3	21.2006	28.7215	3.15435	15.3616	4.30694	1.91567	1.46954	2.5971	2.16263	0.892047	10.4705	9.90971	0.2569	3.33583	4.91357	8.75647	2.43148
LysTTT	tRF5	0	0	0.315435	0	0	0.273667	0	0	0	0	0	0	0	0	0.188983	0.0458454	0.0578923
LysTTT	tRH3	152.534	211.97	58.3555	84.2921	80.2938	48.7128	34.5342	51.5709	29.9678	17.6625	162.601	130.065	0.770699	22.1594	43.8442	92.4014	19.1623
LysTTT	tRH5	1.652	2.84842	3.15435	1.18166	0.922917	2.73667	0.734771	0.742027	0.617894	1.24887	1.23183	2.72517	0	2.85928	2.2678	1.69628	1.38941
MetCAT	Full	2924.59	3353.06	1843.72	1557.43	1168.1	3638.41	1973.23	1845.79	1615.79	2882.56	4500.9	5003.66	178.931	2418.71	2085.43	2876.62	1307.15
MetCAT	Other	2498.1	2791.45	787.01	847.648	611.894	1062.38	616.473	655.581	487.209	442.812	1520.28	1252.09	16.6985	410.545	509.31	1176.26	263.294
MetCAT	tRF2	1.37666	0.949472	0.315435	0	0.307639	0	0	1.11304	0	0	0.205305	0.743228	0	0	0.56695	0.412609	0.173677
MetCAT	tRF3	47.0819	68.8367	6.3087	31.1172	4.30694	2.46301	2.20431	1.85507	3.70736	1.42728	17.2456	14.8646	0	2.14446	10.961	17.3754	3.87878
MetCAT	tRF5	0	0.237368	0	0	0	0	0	0	0	0	0	0	0.12845	0	0	0.0229227	0.0578923
MetCAT	tRH3	34.6919	56.9683	11.0402	10.635	16.6125	16.1464	10.6542	17.0666	6.79683	3.56819	29.5639	27.004	1.0276	6.43339	9.63816	20.8826	4.97874
MetCAT	tRH5	0.275333	2.13631	0.315435	1.18166	0.922917	0	0.367386	0	0.308947	0.356819	2.66896	0.990971	0	0	0.755934	0.871063	0.231569
PheGAA	Full	138.492	174.94	72.55	49.236	44.3	141.486	64.2925	73.8317	49.7404	138.267	138.17	135.268	6.6794	65.5252	71.8137	109.685	40.9298
PheGAA	Other	30.562	44.1505	14.1946	18.1189	8.92153	9.85203	9.55202	13.7275	7.72367	12.3103	27.1002	25.022	1.41295	9.53094	13.9848	19.3238	7.23653
PheGAA	tRF2	0	0	0	0	0	0	0	0	0	0	0	0	0	0	0	0	0
PheGAA	tRF3	74.6152	70.7357	17.6644	65.7793	9.84445	8.75736	5.51078	3.33912	5.2521	3.21137	31.6169	31.4633	0	5.00374	19.2763	27.4156	7.12075
PheGAA	tRF5	0.275333	0.949472	0	0	0	0	0	0	0	0	0	0.495486	0	0	0	0.160459	0
PheGAA	tRH3	198.515	255.883	50.1542	70.506	54.7597	55.8281	44.4537	51.5709	31.5126	34.7898	144.945	122.385	1.0276	25.257	50.4586	98.0175	22.057
PheGAA	tRH5	0.275333	0	0	0	0	0	0	0	0	0.178409	0.615914	0	0.38535	0.714821	0.377967	0.114614	0.463138
ProAGG	Full	3151.74	3595.65	1419.14	968.571	983.829	2453.98	1790.64	1899.22	1028.79	2200.86	2396.52	2443.98	198.327	1614.78	1412.84	2129.86	914.524
ProAGG	Other	281.39	326.856	132.167	112.258	119.364	146.138	129.687	134.678	79.0904	130.239	281.062	243.283	7.06474	125.808	126.241	185.17	72.4232
ProAGG	tRF2	0	0	0	0	0	0	0	0	0	0	0	0	0	0	0	0	0
ProAGG	tRF3	10.1873	15.1916	1.26174	6.6961	0.615278	0.273667	0.367386	1.11304	0.617894	0	2.46366	2.47743	0	0.238274	0.56695	3.50717	0.231569
ProAGG	tRF5	0	0	0	0	0	0	0	0	0	0	0	0	0	0	0	0	0
ProAGG	tRH3	1063.34	1541.71	350.448	506.934	361.476	243.29	160.915	180.684	147.986	72.0774	741.561	621.587	8.60614	158.452	354.722	521.446	151.041
ProAGG	tRH5	3.30399	3.32315	0.315435	0	0.307639	0.273667	1.10216	1.11304	0.308947	0.713638	1.64244	2.22968	0.2569	0.476547	1.51187	1.30659	0.694707
ProCGG	Full	4524.55	4928	2072.09	1433.75	1421.29	3485.15	2555.53	2714.34	1532.07	3066.14	3280.98	3305.14	275.14	2282.18	1969.96	2991.34	1281.97
ProCGG	Other	310.025	365.784	136.583	109.501	110.135	155.169	128.218	129.484	94.2288	150.221	302.003	278.463	7.57854	147.491	151.376	200.413	85.6227
ProCGG	tRF2	0	0	0	0.393888	0	0	0	0	0	0	0.205305	0	0	0	0	0.0458454	0
ProCGG	tRF3	13.7666	23.4994	0.63087	9.45332	2.76875	0.273667	0	1.48405	0.308947	0	0.821219	1.48646	0	0.476547	2.83475	4.58454	0.984169
ProCGG	tRF5	0	0	0	0	0	0	0	0	0	0	0	0	0	0	0.188983	0	0.0578923
ProCGG	tRH3	490.643	727.058	179.798	272.965	203.349	129.992	105.44	123.177	70.1309	35.3251	416.564	349.565	3.46815	91.497	188.794	268.837	81.6281
ProCGG	tRH5	1.92733	4.98473	0.315435	0.393888	0.307639	0.547335	1.10216	0.371014	1.23579	0.892047	3.49018	1.98194	0.64225	0.953094	3.21272	1.62751	1.5052
ProTGG	Full	6074.39	6163.03	2890.96	2150.63	2171.01	5051.9	3669.08	3980.98	3266.19	4132.14	4857.1	5030.42	430.564	3391.11	2913.94	4276.94	1910.62
ProTGG	Other	587.56	629.263	288.938	354.893	279.644	332.232	276.274	300.521	421.712	282.422	589.841	547.511	35.1953	325.005	313.901	419.898	190.987
ProTGG	tRF2	0	0	0	0	0.307639	0	0	0	0	0	0.205305	0	0	0	0	0.0458454	0
ProTGG	tRF3	13.7666	19.7016	1.26174	9.05943	2.76875	1.09467	1.83693	1.11304	0.617894	0.178409	6.56975	2.47743	0	0.476547	1.70085	5.18053	0.636815
ProTGG	tRF5	0	0	0	0	0	0	0	0	0	0	0	0	0	0	0	0	0
ProTGG	tRH3	1735.97	2439.43	592.702	869.311	651.579	400.649	324.769	346.527	269.402	122.567	1303.28	1092.3	11.6889	284.022	619.11	879.865	263.931
ProTGG	tRH5	5.50666	8.78262	0	1.57555	1.23056	1.09467	0.367386	1.85507	0.308947	0.892047	3.28488	4.95486	0.38535	1.19137	3.02373	2.68196	1.38941
SeCTCA	Full	12194.5	10025.7	12282.1	12817.1	10477.6	13643.4	11264	11281.4	10602.4	13828	8240.11	8574.62	2575.55	5608.72	4910.17	11221.9	4027.68
SeCTCA	Other	729.632	625.228	1315.68	1244.69	945.682	1477.8	1042.27	1005.08	974.727	1531.82	1192.82	1221.37	163.774	827.762	643.3	1125.87	471.996
SeCTCA	tRF2	0.825999	0.237368	0.315435	0.393888	0.615278	0.273667	0.367386	0.371014	0	0.178409	0.41061	0.495486	0.12845	0.476547	0.377967	0.366763	0.289461
SeCTCA	tRF3	39.0973	41.0647	14.8254	41.7522	23.9958	3.83134	8.08248	12.2435	4.94315	5.17387	12.7289	5.69808	0.899149	1.19137	5.10255	17.0774	2.2578
SeCTCA	tRF5	0	0.474736	0	0	0.307639	0	0	0	0	0.178409	0	0	0	0	0	0.0916908	0
SeCTCA	tRH3	196.588	160.461	115.449	111.47	130.439	134.918	157.608	158.794	125.123	118.642	111.686	103.804	10.7898	41.6979	31.5602	134.006	24.6621
SeCTCA	tRH5	6.88332	7.35841	2.20804	1.57555	6.76806	3.55768	5.1434	4.08115	3.70736	2.49773	6.77506	5.94583	0.2569	1.42964	3.77967	4.81377	1.62098
SerAGA	Full	1323.53	1493.52	704.682	530.961	559.595	1708.23	901.564	964.265	617.894	867.605	1286.85	1443.84	139.753	977.398	867.623	1071.73	566.244
SerAGA	Other	2264.06	2210.85	769.661	734.208	702.032	1303.75	922.505	804.358	657.748	405.882	1420.3	1242.18	30.6995	556.13	581.313	1143.89	327.033
SerAGA	tRF2	2.478	1.89894	0.63087	0.393888	3.07639	0.821002	0.367386	0	0.617894	0	3.49018	2.97291	0	0.476547	0.944917	1.48998	0.405246
SerAGA	tRF3	18.172	18.5147	0.63087	8.66554	4.61458	1.642	2.5717	1.85507	0.92684	0.713638	7.80158	5.69808	0	2.38274	10.0161	6.16621	3.64721
SerAGA	tRF5	0.275333	0.474736	0	0	0.615278	0	0	0	0	0.178409	0	0	0	0	0	0.137536	0
SerAGA	tRH3	2456.8	2153.64	696.48	687.335	537.753	1145.02	684.807	737.946	631.796	452.803	1389.09	1288.51	48.1687	643.339	735.146	1106.8	403.22
SerAGA	tRH5	0	0.474736	0.315435	0.393888	0	0	0	0	0	0	0.615914	0.495486	0.12845	0	0.188983	0.206304	0.115785
SerCGA	Full	1524.79	1575.41	822.97	740.51	721.413	1978.34	1039.7	1084.1	915.409	1517.19	1771.58	1950.97	169.297	1202.09	988.95	1374.47	671.319
SerCGA	Other	5339.26	4378.25	2299.84	2224.68	1855.37	3710.38	2359.72	2182.67	1948.53	1998.36	4826.31	4562.93	170.196	2516.17	2310.51	3257.43	1395.84
SerCGA	tRF2	4.68066	9.49472	1.26174	3.15111	1.84583	0.547335	1.10216	0	0.617894	1.24887	5.54323	6.19357	0	1.66791	2.45678	3.2321	1.15785
SerCGA	tRF3	8.81065	9.01999	3.15435	5.90832	2.76875	0.821002	1.46954	0.742027	1.54473	0.178409	3.49018	4.70711	0.12845	1.66791	3.77967	3.55302	1.62098
SerCGA	tRF5	0	0.237368	0	0	0	0	0	0	0	0	0	0	0	0	0	0.0229227	0
SerCGA	tRH3	2495.07	2061.78	899.305	820.863	794.939	1389.41	862.254	867.801	796.465	774.832	2066.6	2094.91	75.2716	1005.75	1287.92	1386.2	672.824
SerCGA	tRH5	0.550666	0.237368	0	0.787777	0.307639	0	1.10216	0	0.308947	0.178409	0.41061	0.495486	0	0	0.377967	0.343841	0.115785
SerGCT	Full	3191.66	3066.8	2802.32	2083.67	2350.98	4563.95	3328.15	3913.82	2294.55	3656.68	3423.66	4014.92	872.175	3194.06	2752.73	3287.53	2012.39
SerGCT	Other	5108.53	4624.41	3095.36	2927.38	2827.82	3511.7	3648.14	3500.89	2770.02	2908.97	3976.75	3664.12	228.898	2023.18	1705.58	3578.28	1117.21
SerGCT	tRF2	6.60799	7.35841	2.52348	5.90832	2.46111	0.821002	0.734771	0.742027	2.16263	0.892047	5.33793	6.44131	0	3.33583	3.21272	3.59886	1.79466
SerGCT	tRF3	35.7933	40.5899	9.46305	27.1783	14.459	5.19968	7.34771	7.04926	5.86999	0.356819	18.4774	23.0401	0.38535	7.62475	18.8983	16.2522	7.81546
SerGCT	tRF5	1.37666	1.89894	0.315435	0.393888	0.307639	0	0	1.11304	0	0	0.205305	0	0	0	0.188983	0.458454	0.0578923
SerGCT	tRH3	1332.89	1250.22	835.903	748.388	715.876	919.249	1235.15	1143.46	798.936	824.43	1139.65	1148.54	73.9871	559.705	518.004	1012.77	328.018
SerGCT	tRH5	0	0.474736	0	0	0.307639	0	0	0	0	0.535228	0.41061	0.495486	0	0.476547	0.944917	0.229227	0.405246
SerTGA	Full	2306.19	2498.3	1198.97	950.059	1094.89	2961.08	1675.65	1679.58	1146.5	1595.34	2408.43	2796.52	281.562	1808.02	1536.81	1931.31	1036.97
SerTGA	Other	4075.2	3767.03	1548.47	1489.29	1385.61	2573.02	1834.36	1610.94	1358.44	1023	3053.29	2778.43	85.4192	1403.43	1296.8	2265.22	776.741
SerTGA	tRF2	6.05732	7.59578	2.20804	3.54499	4.61458	0.821002	0.734771	2.5971	1.23579	0.892047	7.39097	4.45937	0	0.714821	3.4017	3.66763	1.21574
SerTGA	tRF3	46.5313	51.7462	11.3557	46.0849	12.3056	3.28401	5.87817	7.79129	3.39842	0.713638	21.3517	20.8104	0	5.24202	15.8746	19.0717	6.13658
SerTGA	tRF5	0.275333	0.712104	0.315435	0.393888	0.307639	0.273667	0	0	0	0	0	0.247743	0	0.238274	0	0.206304	0.0578923
SerTGA	tRH3	4476.09	3994.91	1671.17	1517.26	1375.76	2577.13	1706.14	1733.01	1450.51	1055.47	3246.07	3164.67	132.303	1555.21	1730.52	2398.56	967.611
SerTGA	tRH5	0.275333	0.949472	0	0.393888	0.307639	0.547335	0.367386	0	0.308947	0	0.615914	0	0	0.238274	0.377967	0.320918	0.173677
ThrAGT	Full	320.487	451.711	139.107	118.954	121.21	291.729	159.813	195.524	123.888	311.681	422.928	461.297	26.5891	273.061	253.616	281.995	156.02
ThrAGT	Other	2166.59	2985.85	599.326	725.148	536.83	694.841	588.552	670.051	392.671	239.069	1262.42	1022.68	13.4872	320.478	467.356	1026.23	227.111
ThrAGT	tRF2	0.275333	0.474736	0	0	0	0	0	0	0	0	0	0	0	0	0	0.0687681	0
ThrAGT	tRF3	38.5466	32.0447	4.10065	16.9372	6.46042	5.47335	2.20431	3.33912	2.16263	1.78409	17.4509	14.6168	0	6.67166	15.8746	12.5616	6.48393
ThrAGT	tRF5	0.275333	0.237368	0	0	0	0	0	0	0	0	0	0.247743	0	0	0	0.0687681	0
ThrAGT	tRH3	12036.5	15525.5	4896.81	6013.1	3999.61	5321.46	3933.96	4370.91	3196.36	1990.34	9183.9	8166.34	134.744	3098.51	4562.06	6740.33	2211.08
ThrAGT	tRH5	0	0	0	0	0	0	0	0	0	0	0	0	0	0	0.377967	0	0.115785
ThrCGT	Full	709.533	892.741	764.614	671.973	630.967	990.95	839.843	895.998	578.348	1164.66	1606.92	1818.68	88.7589	1056.03	1150.91	1017.97	649.146
ThrCGT	Other	7242.91	6740.54	3877.96	4643.55	3497.24	3991.99	3156.21	3441.15	2427.4	2820.3	8200.9	8265.69	212.328	4780.24	6613.85	5033.39	3283.19
ThrCGT	tRF2	4.12999	4.74736	1.26174	3.54499	1.23056	0.821002	0	0.371014	0.308947	0.178409	3.49018	4.21163	0	1.90619	6.23645	2.10889	2.37358
ThrCGT	tRF3	64.9786	61.241	20.1878	79.5654	16.6125	6.02068	7.7151	5.56521	5.56104	2.67614	34.6965	31.2156	0	8.81612	27.0246	27.5072	10.4206
ThrCGT	tRF5	0	0	0	0.393888	0.307639	0	0.367386	0	0	0	0	0	0	0	0.377967	0.0687681	0.115785
ThrCGT	tRH3	9765.78	11263.6	5340.31	6542.48	4013.15	4903.02	3676.79	3952.41	2916.15	2044.75	9201.97	9085.22	159.792	4116.65	6836.66	6200.04	3166.53
ThrCGT	tRH5	0	0.237368	0	0.393888	0	0.547335	0	0	0	0	0.205305	0	0	0	0	0.114614	0
ThrTGT	Full	461.733	575.618	184.845	154.01	167.048	386.418	196.551	211.849	177.644	346.114	403.629	420.172	33.397	252.808	210.339	328.184	140.91
ThrTGT	Other	1548.75	2018.34	511.32	609.345	541.137	640.108	570.55	669.309	413.062	305.615	1306.35	1159.19	37.7643	453.435	606.826	890.386	313.081
ThrTGT	tRF2	0.275333	0.474736	0	0	0	0	0	0.371014	0	0	0.205305	0.743228	0	0	0	0.183382	0
ThrTGT	tRF3	43.5026	42.2515	5.36239	20.8761	7.38333	0.821002	3.67386	3.71014	3.08947	1.78409	13.5501	8.671	0.2569	3.33583	7.37035	13.1576	3.18408
ThrTGT	tRF5	0	0	0	0	0	0	0	0	0	0	0	0	0	0	0.188983	0	0.0578923
ThrTGT	tRH3	15359.4	17567.1	6617.51	8028.62	6292.45	7700.73	6357.97	7106.77	5659.91	3997.44	11227.7	10543.4	536.664	4774.29	6629.92	9035.69	3432.84
ThrTGT	tRH5	0.825999	0	0.315435	0	0.307639	0	0	0	0	0	0.41061	0.247743	0	0	0	0.183382	0
TrpCCA	Full	1220.55	1474.77	843.473	663.308	545.444	1396.25	1025.74	1258.11	737.456	1760.9	1389.5	1449.79	186.252	971.918	1056.23	1213.5	643.646
TrpCCA	Other	1920.45	2034.48	660.521	702.303	595.281	875.188	738.812	941.633	565.064	630.142	988.543	910.207	44.9575	408.639	526.697	984.645	280.893
TrpCCA	tRF2	0.825999	0.237368	0	0.787777	0	0.273667	0	0.371014	0	0.178409	0	0	0	0	0.56695	0.206304	0.173677
TrpCCA	tRF3	61.6746	88.7757	14.51	48.8421	15.3819	8.21002	6.61294	5.56521	7.10578	2.67614	20.1199	15.6078	0.2569	7.62475	27.9695	24.7565	10.5364
TrpCCA	tRF5	0	0	0	0	0	0	0	0	0	0	0	0	0	0	0	0	0
TrpCCA	tRH3	823.521	1301.01	265.281	399.009	295.949	206.619	200.593	257.113	164.669	89.3831	416.358	337.921	8.73459	95.5477	197.11	405.915	87.5331
TrpCCA	tRH5	0.275333	0.474736	0	0	0	0.273667	0	0	0	0	0.615914	0.990971	0.12845	0.238274	0.56695	0.25215	0.289461
TyrATA	Full	0.825999	1.18684	0.315435	0	0.307639	0	0.734771	0.742027	0.617894	0.892047	0.615914	0.495486	0	0.714821	0.944917	0.59599	0.463138
TyrATA	Other	0.275333	0.237368	1.89261	2.75722	1.53819	3.83134	0.367386	3.33912	1.85368	0.178409	1.02652	1.48646	0	0.238274	1.51187	1.42121	0.52103
TyrATA	tRF2	0	0	0	0	0	0	0	0	0	0	0	0	0	0	0	0	0
TyrATA	tRF3	0	0	0	0	0	0	0	0	0	0	0	0	0	0	0	0	0
TyrATA	tRF5	0	0	0	0	0	0	0	0	0	0	0	0	0	0	0	0	0
TyrATA	tRH3	0	0	0	0.393888	0	0	0	0	0	0	0	0	0	0	0	0.0229227	0
TyrATA	tRH5	0	0	0	0	0	0	0	0	0	0	0	0	0	0	0	0	0
TyrGTA	Full	14.042	16.8531	42.2683	35.8438	11.9979	9.85203	6.24555	10.7594	19.4636	11.2398	13.3448	10.6529	0.64225	8.33957	5.6695	16.0917	4.05246
TyrGTA	Other	2931.47	3340.01	775.654	838.982	755.254	1196.47	997.452	1207.28	589.471	590.357	1729.69	1534.52	35.7091	511.335	625.913	1419.81	332.07
TyrGTA	tRF2	0.275333	0.474736	0	0	0	0.273667	0.367386	0	0	0	0.615914	0	0	0	0	0.183382	0
TyrGTA	tRF3	22.8526	29.671	5.04696	16.5433	5.22986	5.19968	0.734771	1.48405	1.23579	0	10.6759	10.1575	0.12845	2.85928	9.44917	9.28369	3.64721
TyrGTA	tRF5	0	0.237368	0	0	0	0	0	0	0	0	0	0	0	0.238274	0.56695	0.0229227	0.231569
TyrGTA	tRH3	273.681	313.089	79.1742	122.893	60.9125	65.6802	51.434	56.0231	43.2526	38.1796	171.224	128.826	0.770699	33.12	62.9315	121.788	27.6725
TyrGTA	tRH5	0	2.13631	0	0.393888	0.922917	0.821002	0	0	0	0	0.615914	0.495486	0.2569	0.714821	0.755934	0.481377	0.52103
ValAAC	Full	21927.5	19541.3	16589.7	15913.1	12798.1	20951.7	14391.6	14163.1	13929.2	22321.7	17441.1	16713	3404.56	11911.3	9746.82	17721.1	7414.26
ValAAC	Other	1927.61	2434.92	1129.89	1097.37	1006.29	1205.78	839.476	983.186	722.936	1313.63	1502.01	1270.92	144.506	676.459	727.775	1338.41	452.428
ValAAC	tRF2	0	0.237368	0	0	0	0	0	0	0	0	0.205305	0.247743	0	0	0	0.0687681	0
ValAAC	tRF3	42.6766	73.8215	10.4094	31.5111	8.92153	6.84168	4.77601	4.45216	3.39842	3.92501	12.3183	13.6259	0.38535	6.19511	17.1975	18.4757	6.94707
ValAAC	tRF5	5.50666	6.88367	2.20804	1.57555	1.53819	2.18934	0	2.22608	0.308947	1.24887	2.05305	4.45937	0.38535	0.714821	2.45678	2.63611	1.09995
ValAAC	tRH3	192.733	413.97	75.0735	102.805	72.2951	68.1432	41.882	54.91	33.3663	16.4137	165.681	148.398	2.69745	38.362	110.366	121.376	44.3455
ValAAC	tRH5	20.3746	20.1763	5.67783	6.6961	8.61389	6.84168	10.2868	8.90433	6.17894	6.06592	17.8615	11.6439	3.3397	20.7298	27.7806	11.1634	15.052
ValCAC	Full	37163.9	32352.1	31656.7	31331.8	24934.7	37478.5	28407	28364.4	26599.1	39287.9	31331.6	30682.2	6645.74	21960.5	18008	32222.8	13847.4
ValCAC	Other	6944.45	8117.99	3873.86	3599.35	3260.97	3964.62	2885.81	3437.81	2435.74	3757.3	4517.32	3954.97	443.024	1986.96	2364.56	4354.4	1406.78
ValCAC	tRF2	1.92733	1.89894	0.315435	1.18166	1.23056	0.273667	0.734771	0.742027	0.308947	0.178409	1.84774	1.23871	0	0.238274	0.56695	1.0086	0.231569
ValCAC	tRF3	57.2692	101.356	8.51674	42.9338	9.53681	6.84168	7.7151	5.56521	9.2684	2.85455	15.3979	18.5807	0.5138	6.43339	18.3314	24.2751	7.41021
ValCAC	tRF5	0.275333	1.18684	0	0	0.615278	0	0.734771	0	0.308947	0.178409	0.821219	0.990971	0	0.476547	0.56695	0.458454	0.289461
ValCAC	tRH3	192.458	464.292	86.1137	111.47	97.5215	77.4479	44.4537	74.5738	35.8378	16.2353	186.827	169.704	3.46815	38.8386	119.815	136.046	47.7032
ValCAC	tRH5	57.8199	72.3973	7.255	13.3922	14.1514	14.5044	11.0216	15.2116	20.0815	16.0569	34.9018	27.4994	5.78025	35.741	49.8916	27.0029	26.5726
ValTAC	Full	9173.54	7959.66	5564.27	5125.67	4059.91	8867.37	4851.33	4780.88	5183.2	6305.7	6695.2	7124.34	498.771	4558.65	3851.1	6479.86	2512.12
ValTAC	Other	1088.67	1194.91	491.132	423.43	417.158	660.633	432.045	491.222	384.639	553.248	784.059	721.179	34.4246	435.564	419.732	663.979	249.921
ValTAC	tRF2	0.825999	0.712104	0	0	0.922917	0	0	0.742027	0	0	0.41061	0.495486	0	0	0.188983	0.343841	0.0578923
ValTAC	tRF3	9.08599	10.2068	1.26174	5.12055	0.307639	0.273667	0	0	1.23579	0.535228	3.07957	3.96388	0.12845	1.66791	2.64577	3.04872	1.27363
ValTAC	tRF5	0.550666	0.712104	0	0	0	0	0	0	0	0	0.205305	0	0	0.238274	0	0.137536	0.0578923
ValTAC	tRH3	45.4299	98.7451	27.7583	44.5094	24.6111	29.8297	21.6757	25.2289	14.2116	2.67614	43.5246	35.1795	0.64225	15.4878	20.4102	34.682	10.3048
ValTAC	tRH5	9.36132	13.53	0	1.57555	3.38403	3.83134	4.04124	2.96811	3.08947	1.42728	11.2918	11.3962	0.770699	12.3902	13.4178	5.91406	7.4681

## Sheet: Mt tRNA fragments (CPM)
ID	Type	DNaseI_1	DNaseI_2	DNaseI_3	DNaseI_4	DNaseI_5	DNaseI_6	DNaseI_7	DNaseI_8	DNaseI_9	DNaseI_10	DNaseI_11	DNaseI_12	DNaseI_PNK1	DNaseI_PNK2	DNaseI_PNK3	DNaseI	RNK	Comments
AlaTGC	Full	3439.18	3370.63	6051.62	6116.3	5938.66	4756.07	7470.79	7617.28	6871.9	5715.7	3913.32	4166.79	1269.47	3204.3	2504.22	5251.89	2117.82	CPM is calculated by number of reads * 1,000,000/total mapped reads in eacg database
AlaTGC	Other	557.549	643.742	996.143	959.512	1185.03	603.437	1528.32	1648.04	1481.4	1987.3	997.371	922.099	118.559	475.594	452.615	1134.77	307.64
AlaTGC	tRF2	0	0.237368	0	0	0	0	0	0	0	0	0.205305	0	0	0	0	0.0458454	0
AlaTGC	tRF3	3.02866	1.66158	2.20804	4.72666	6.76806	0.821002	5.87817	5.93622	2.78052	3.38978	4.1061	3.4684	0	0.714821	1.32288	3.57594	0.578923	DNase I (column T) is the combined dataset of DNaseI_1 to Dnase I_12 (column C to N)
AlaTGC	tRF5	0	0	0	0	0	0	0	0	0	0	0.205305	0	0	0	0	0.0229227	0
AlaTGC	tRH3	731.009	831.738	1258.27	1561.77	1623.1	542.135	1574.25	1789.4	1591.69	1145.57	1033.3	860.658	76.813	296.889	422.378	1158.93	236.143
AlaTGC	tRH5	1.652	0.949472	0.315435	0.787777	0.922917	0.273667	1.46954	0.371014	0.617894	0.356819	0.821219	1.23871	0.64225	0.476547	0	0.802295	0.405246	DNAse I -3'P (column U) is the combined dataset of DNaseI_PNK1 to Dnase I_PNK3 (column O to Q)
ArgTCG	Full	7943.9	7646.58	10704.3	12042.3	11167.3	11130.3	17666.5	17158.6	16133.8	8791.48	7176.84	7437.98	3875.33	5603.72	4798.48	10621.4	4578.06
ArgTCG	Other	2229.1	2729.02	2851.22	3136.53	3682.44	2964.91	7105.97	6421.51	6364.3	3181.4	1885.31	1673.25	956.31	979.066	981.391	3447.99	969.522
ArgTCG	tRF2	0	0	0	0	0	0	0	0	0	0.178409	0.205305	0	0	0	0	0.0458454	0
ArgTCG	tRF3	3.85466	7.12104	4.73152	15.3616	6.15278	1.09467	9.91941	9.27534	7.41472	4.46024	2.87427	2.47743	1.7983	1.66791	0.755934	5.66191	1.44731	Full: full length tRNA
ArgTCG	tRF5	0.550666	0.474736	0.315435	0.393888	0.922917	0	1.46954	0	1.23579	0.535228	0.41061	0.247743	0.64225	0	0.188983	0.527222	0.347354	tRF2: internal tRNA frgaments contain anticodon loop
ArgTCG	tRH3	877.761	1351.1	876.594	1426.27	1379.45	785.973	2063.97	2004.59	1976.95	414.445	742.382	715.481	307.252	277.112	723.618	1120.53	427.477
ArgTCG	tRH5	7.98465	11.1563	3.15435	7.08999	11.9979	2.46301	11.0216	6.30723	18.2279	3.38978	4.3114	5.94583	5.00955	2.62101	2.83475	7.38111	3.763	tRF3: 3' tRNA fragments
AsnGTT	Full	1871.44	1963.27	4550.15	4200.82	3559.07	3904.41	5635.33	5324.79	5135.93	3908.59	2386.05	2376.1	312.39	1639.08	1198.53	3562.88	906.188	tRF5: 5' tRNA fragments
AsnGTT	Other	557.549	653.474	1327.03	1167.88	1175.49	1075.51	2086.38	2077.68	1960.27	2570.17	1372.46	1284.05	77.4553	530.159	397.81	1457.86	285.583	tRH3: 3' tRNA halves
AsnGTT	tRF2	0	0.237368	0.63087	0	0.307639	0	1.10216	0.371014	0.92684	0	0.615914	0	0	0	0.188983	0.320918	0.0578923	tRH5: 5' tRNA halves
AsnGTT	tRF3	0	0.712104	0.315435	2.36333	2.15347	0.273667	0	0.371014	0.92684	0.178409	1.02652	0.990971	0.38535	0.238274	0.188983	0.733526	0.289461	Other: other fragments
AsnGTT	tRF5	0	0.237368	0.63087	0.393888	0.307639	0	0	0	0	0.178409	0.615914	0	0.12845	0	0.56695	0.206304	0.231569
AsnGTT	tRH3	24.5046	32.5194	35.9596	52.3871	62.1431	20.7987	78.2531	81.623	71.0578	47.8137	46.1936	37.4092	3.0828	12.3902	14.5517	47.1749	8.85752
AsnGTT	tRH5	1.10133	3.56052	1.89261	2.36333	2.76875	1.36834	6.24555	4.82318	2.78052	1.24887	2.66896	3.22066	1.15605	1.42964	2.2678	2.68196	1.56309
AspGTC	Full	6953.26	6798.93	11323.2	11460.2	12342.2	10952.7	18045.6	15969.5	16257.7	7651.8	6988.99	7308.66	3629.61	5074.99	4202.99	10320.9	4156.43
AspGTC	Other	4946.08	5275.03	5969.29	5976.86	7776.8	5840.34	11199.4	9305.77	10328.7	4028.13	4490.43	4510.16	1942.16	2988.19	2978.38	6247.77	2513.74
AspGTC	tRF2	0	0	0.315435	0.393888	0.307639	0	0	1.11304	0	0	0.205305	0.247743	0	0	0	0.183382	0
AspGTC	tRF3	2.75333	5.45947	4.41609	15.3616	16.9201	0.273667	9.55202	4.82318	8.95946	1.78409	3.69549	3.22066	0.64225	1.19137	3.21272	5.7536	1.56309
AspGTC	tRF5	0	0.474736	0.315435	2.36333	0.922917	0	1.83693	0.742027	0.308947	0	0	0.247743	0.2569	0	0.56695	0.481377	0.289461
AspGTC	tRH3	791.031	1083.59	974.063	1212.39	1830.76	628.34	2381.76	1911.46	1967.06	350.218	825.325	708.297	240.458	246.851	404.803	1116.22	292.356
AspGTC	tRH5	6.60799	12.3431	6.93957	9.84721	20.9194	3.55768	31.9625	17.4376	22.5531	4.81706	9.03341	8.42325	6.29405	4.05065	5.85849	11.8281	5.61555
CysGCA	Full	3591.17	3427.12	4443.85	4787.32	4223.57	5369.9	8831.21	8078.45	8474.41	5876.09	3134.8	3152.28	1028.63	1963.61	1522.26	5071.53	1407.01
CysGCA	Other	179.242	215.768	226.167	256.815	224.269	275.583	581.939	602.526	561.974	576.976	300.156	276.976	86.0614	138.913	137.391	355.439	114.627
CysGCA	tRF2	0	0	0	0	0	0	0	0	0	0	0	0	0	0	0	0	0
CysGCA	tRF3	0	0	0.315435	0.787777	1.23056	0	0.367386	0	0.308947	0	0	0	0	0	0	0.206304	0
CysGCA	tRF5	0	0	0	0	0.307639	0	0	0	0	0	0	0	0.64225	0	0	0.0229227	0.289461
CysGCA	tRH3	15.694	25.161	15.4563	18.1189	23.3806	15.3254	33.0647	41.1825	39.5452	16.7705	20.7358	20.3149	5.6518	11.6754	17.5755	22.831	10.768
CysGCA	tRH5	3.30399	4.27263	1.26174	5.12055	4.30694	0.821002	5.1434	4.45216	3.39842	1.42728	3.07957	1.23871	0.64225	0.953094	2.64577	2.95703	1.33152
GlnTTG	Full	2273.42	2367.51	4971.57	4729.81	4983.44	3936.43	7039.11	7091.19	6299.73	4926.6	2906.91	2913.95	467.301	1745.83	1371.26	4327.39	1054.86
GlnTTG	Other	405.29	430.586	817.607	782.656	984.445	537.483	1532.73	2202.71	1425.17	1532.54	893.281	814.826	62.5551	361.461	385.337	1008.16	234.058
GlnTTG	tRF2	0	0	0	0	0.307639	0	0	0.371014	0	0	0.205305	0	0	0	0	0.0687681	0
GlnTTG	tRF3	3.02866	2.37368	5.36239	16.5433	8.61389	1.642	8.08248	6.30723	4.6342	0.713638	9.03341	4.95486	0	2.38274	9.26019	5.40976	3.41564
GlnTTG	tRF5	0.275333	0	0.63087	0.393888	0.615278	0	0	0	0.308947	0	0	0	0	0.238274	0	0.160459	0.0578923
GlnTTG	tRH3	511.569	648.252	977.217	1321.5	1551.42	372.188	1432.07	1633.94	1435.98	827.998	1046.44	907.234	54.2059	328.817	500.239	1003.9	257.563
GlnTTG	tRH5	3.30399	5.69683	2.83891	2.75722	3.38403	2.18934	3.67386	3.71014	2.16263	0.713638	3.49018	3.96388	0.770699	0.238274	0	3.09456	0.405246
GluTTC	Full	4798.5	4432.14	6785.01	7518.15	6519.79	6853.45	9715.14	9534.31	9710.51	7501.76	5137.55	5532.84	1711.6	4308.94	3337.83	6783.08	2840.83
GluTTC	Other	677.87	787.825	843.788	952.422	872.464	938.953	1447.87	1468.47	1708.78	2403.18	1373.9	1284.05	162.874	664.307	590.006	1281.75	415.551
GluTTC	tRF2	0	0.237368	0	0	0	0.273667	0.734771	0.371014	0.617894	0	0.205305	0	0.2569	0	0.188983	0.183382	0.173677
GluTTC	tRF3	9.36132	8.54525	2.20804	16.9372	7.69097	4.10501	6.24555	10.3884	9.8863	7.13638	9.85463	9.41422	0.38535	3.09756	8.31527	8.32094	3.47354
GluTTC	tRF5	0	0.237368	0.63087	0.787777	0	0.273667	0.367386	0.742027	0.308947	0.178409	0.821219	0.495486	0.64225	0	0.56695	0.389686	0.463138
GluTTC	tRH3	124.726	167.582	139.422	202.852	231.037	90.5839	316.686	326.121	304.622	241.388	164.244	127.092	18.6252	46.2251	67.0891	196.929	40.1772
GluTTC	tRH5	3.02866	4.74736	1.26174	1.18166	3.07639	1.91567	6.61294	2.96811	3.39842	3.38978	3.90079	4.70711	1.92675	2.14446	3.02373	3.41548	2.31569
GlyTCC	Full	4842.28	4786.53	5673.1	6180.5	6106.02	7035.44	10641.7	9932.78	10216.6	5083.24	3615.42	3646.53	2208.18	2482.33	2278.2	6111.47	2296.24
GlyTCC	Other	1148.69	1414	874.07	899.641	1065.05	1369.71	2452.3	2501	2543.87	861.361	607.702	526.949	310.72	431.037	523.106	1265.7	405.014
GlyTCC	tRF2	0	0	0.315435	0	0	0	0.367386	0	0	0	0	0	0	0	0.188983	0.0458454	0.0578923
GlyTCC	tRF3	0	0.474736	0	0	0	0	0.367386	0	0	0	0	0.495486	0	0	0	0.114614	0
GlyTCC	tRF5	0	0	0	0	0	0	0	0	0	0	0	0	0.2569	0	0	0	0.115785
GlyTCC	tRH3	57.2692	111.326	36.5905	55.9321	50.7604	33.3874	97.3572	119.466	80.6351	13.5591	24.4313	21.0581	9.24839	5.71857	13.7958	53.8683	9.78379
GlyTCC	tRH5	5.50666	9.49472	1.26174	1.96944	5.84514	0.821002	7.7151	5.19419	6.48788	1.9625	1.02652	1.7342	2.569	0.953094	1.70085	3.89686	1.91045
HisGTG	Full	9754.77	8967.29	13823	15452.2	13822.8	13288.7	19778.9	19593.2	18272	10630.9	8451.99	8978.94	4236.41	6901.12	6027.25	12665.6	5432.44
HisGTG	Other	2003.6	2335.46	2191.33	2225.86	3072.08	2209.32	4637.14	4774.95	4856.95	3817.25	2202.72	2155.36	1325.86	1498.03	1634.14	2975.62	1462.13
HisGTG	tRF2	0.275333	0.237368	0	0.393888	0	0	0.367386	0	0	0	0.205305	0	0	0	0.188983	0.114614	0.0578923
HisGTG	tRF3	2.478	2.84842	1.26174	1.18166	2.15347	0.273667	1.46954	2.22608	1.54473	0.178409	0.615914	1.48646	0	0.238274	0.377967	1.39828	0.173677
HisGTG	tRF5	0.550666	0.474736	0.946305	1.96944	1.84583	0	2.20431	3.71014	0.92684	0.178409	0.41061	0.247743	0.12845	0.238274	0.377967	0.939831	0.231569
HisGTG	tRH3	729.632	1028.99	547.595	786.201	958.295	404.754	962.55	1153.48	1098.92	345.758	506.898	450.149	70.9043	97.2156	199.567	706.501	116.711
HisGTG	tRH5	14.3173	32.7568	11.0402	16.9372	27.6875	5.19968	48.4949	27.826	36.7647	8.74206	7.80158	9.90971	7.06474	4.5272	8.50425	19.0258	6.88918
IleGAT	Full	5193.88	5505.28	7180.25	8061.32	8077.68	7434.17	12102	11192.7	11038.1	6030.95	4284.51	4314.69	1866.25	2523.08	2163.67	7097.65	2116.95
IleGAT	Other	1449.08	2041.6	1588.85	1593.28	2325.44	1426.63	3910.82	3047.14	3841.14	2088.46	1100.02	930.026	359.917	375.996	431.071	2013.23	385.62
IleGAT	tRF2	1.37666	0	0	0	0.307639	0	0.734771	0	0.308947	0.535228	0.41061	0	0.5138	0	0.56695	0.320918	0.405246
IleGAT	tRF3	1.652	1.18684	0.315435	1.96944	2.46111	0.273667	0.367386	2.5971	2.16263	0.356819	0.41061	1.23871	0.12845	0.476547	0.188983	1.14614	0.231569
IleGAT	tRF5	0	0.237368	0	0.787777	0	0	0.367386	0	0.308947	0	0	0	0.12845	0	0.188983	0.114614	0.115785
IleGAT	tRH3	1269.84	1940.25	1410.62	1883.18	2531.56	964.951	2741.06	2448.32	2816.36	673.674	1035.35	947.121	221.448	303.56	577.911	1595.7	350.596
IleGAT	tRH5	0.275333	0.237368	0.315435	1.57555	0.615278	0	0.367386	0.742027	1.23579	0.356819	0.615914	0	0.5138	0.238274	0	0.481377	0.289461
LeuTAA	Full	6814.49	6455.23	8847	9543.52	9251.01	9862.15	14747.2	13849.9	14922.7	8061.61	5452.9	5767.7	4116.69	4322.52	3704.83	8965.73	4040.53
LeuTAA	Other	2955.97	3259.06	2413.08	2285.73	3053.01	3559.59	6521.46	5993.36	7544.79	3865.78	2421.98	2480.4	1364.27	1426.31	1695.75	3728.45	1480.88
LeuTAA	tRF2	1.652	0.712104	0.63087	0.393888	1.23056	0.273667	1.46954	1.11304	0.92684	0.535228	1.02652	0.247743	0.5138	0.476547	1.1339	0.825217	0.694707
LeuTAA	tRF3	42.1259	41.7768	28.3891	100.048	46.7611	7.38902	69.8033	58.2492	41.3989	8.02843	11.9077	8.671	4.1104	3.81238	7.37035	33.7193	5.03663
LeuTAA	tRF5	0	0	0	0.393888	0.615278	0.273667	0	0	0	0	0.205305	0.247743	0.12845	0	0.188983	0.137536	0.115785
LeuTAA	tRH3	56.1679	71.9225	46.0535	53.9627	100.598	31.7454	148.424	127.629	141.189	42.9967	31.4116	24.5265	24.1486	8.33957	9.26019	67.1864	15.7467
LeuTAA	tRH5	1.92733	2.61105	1.89261	2.36333	3.69167	1.36834	7.7151	5.19419	9.8863	2.14091	2.46366	0.990971	3.3397	0.714821	1.32288	3.25502	2.08412
LeuTAG	Full	5609.08	5259.37	6461.68	6665.77	5927.28	7812.93	11196.4	10752.7	10096.1	4943.55	3215.89	3109.42	1666.51	1583.33	1638.86	6322.4	1637.83
LeuTAG	Other	1149.51	1324.28	1142.51	1174.18	901.382	1266.81	1813.05	2863.48	1803.94	1250.83	688.592	604.245	239.688	266.152	391.007	1265.61	292.472
LeuTAG	tRF2	0	0	0	0	0	0	0	0	0	0	0	0	0	0	0	0	0
LeuTAG	tRF3	5.23133	14.2421	1.89261	7.08999	2.15347	1.09467	4.40863	5.56521	3.39842	1.42728	1.64244	0.743228	0.38535	0.238274	0.755934	3.91978	0.463138
LeuTAG	tRF5	0	0	0	0	0	0	0	0	0.308947	0	0	0	0.12845	0	0	0.0229227	0.0578923
LeuTAG	tRH3	1728.54	2564.76	1346.91	1810.7	1598.18	1091.39	2054.05	2463.53	2245.73	526.308	770.92	682.531	232.751	202.533	575.077	1469.18	330.275
LeuTAG	tRH5	3.57933	7.83315	2.52348	3.54499	7.0757	1.91567	5.87817	4.82318	9.2684	0.892047	1.64244	0.990971	1.15605	0.953094	1.32288	3.87394	1.15785
LysTTT	Full	6351.1	6281.71	7867.89	8472.14	7692.2	8492.17	13001.8	12706.8	11953.8	5961.73	3981.68	4070.41	2608.69	2723.7	2233.41	7555.07	2521.67
LysTTT	Other	916.859	1240.01	921.07	896.096	1112.42	1147.21	2703.59	2805.98	2720.59	1160.91	548.985	513.818	383.166	447.001	472.27	1296.05	425.971
LysTTT	tRF2	0.275333	0	0	0	0.615278	0.273667	0	0.371014	0.308947	0	0	0	0.2569	0.238274	0.188983	0.137536	0.231569
LysTTT	tRF3	0.275333	0.712104	0	0.787777	0.615278	0	0.367386	0.742027	0	0.178409	0	0	0	0	0.188983	0.275072	0.0578923
LysTTT	tRF5	0.275333	0.712104	0.315435	0.787777	0.615278	0	0	0.371014	0	0	0.205305	0	0	0	0	0.25215	0
LysTTT	tRH3	430.345	862.121	416.059	541.99	607.587	272.846	945.65	992.091	920.97	209.988	202.02	182.586	88.3735	53.3733	116.036	504.047	88.3436
LysTTT	tRH5	4.68066	12.1058	2.20804	6.30221	6.15278	1.09467	12.1237	7.42027	8.34156	3.38978	1.84774	1.48646	1.92675	0.476547	0.944917	5.2493	1.27363
MetCAT	Full	3408.62	3134.45	5454.82	5972.13	5563.65	4738.82	7261.01	7298.21	6562.65	3749.27	3609.67	3799.88	1276.02	2757.06	2417.1	4769.14	1985.42
MetCAT	Other	1716.7	1846.96	1907.12	1811.1	2284.53	1504.08	2871.12	3770.98	2844.78	1694.18	1876.9	1762.44	181.885	711.008	883.498	2074.99	525.372
MetCAT	tRF2	0.550666	0.237368	0	0	1.23056	0	0.367386	0	0	0.178409	0	0	0	0	0	0.206304	0
MetCAT	tRF3	0.275333	0.712104	0.63087	0.787777	1.23056	0.273667	1.83693	0.371014	0.617894	0.892047	0	0.743228	0	0.238274	0.188983	0.664758	0.115785
MetCAT	tRF5	0.825999	0.237368	0.315435	0.393888	2.15347	0.547335	0.734771	0.371014	0.308947	0.356819	0.205305	0.743228	0	0.238274	0.188983	0.573068	0.115785
MetCAT	tRH3	187.226	254.221	283.261	380.102	633.429	134.097	462.906	456.347	516.25	136.84	285.579	236.099	30.5711	69.3376	154.966	307.966	78.0967
MetCAT	tRH5	26.1566	62.4278	23.0267	33.0866	40.916	14.778	36.7386	27.084	28.7321	1.9625	20.3252	19.5717	2.69745	2.38274	7.74832	26.5216	4.16824
PheGAA	Full	182.546	168.057	198.409	198.914	262.108	274.488	474.662	435.199	541.893	446.737	147.204	142.948	108.412	70.2907	85.6095	283.714	92.1645
PheGAA	Other	359.034	382.875	434.985	408.856	418.697	525.441	789.512	853.703	889.458	390.717	225.219	192.001	121.257	114.133	161.392	458.592	131.821
PheGAA	tRF2	0	0	0	0	0	0	0	0	0	0	0	0	0	0	0	0	0
PheGAA	tRF3	0	1.89894	0	0.393888	0.307639	0	0	0.371014	0.617894	0	0.205305	0	0	0	0.188983	0.320918	0.0578923
PheGAA	tRF5	0	0	0	0	0.307639	0	0	0	0	0.178409	0.205305	0.247743	0.12845	0.238274	0	0.0916908	0.115785
PheGAA	tRH3	919.612	1318.11	1211.59	1960.78	1641.87	589.753	1693.65	1999.76	1619.19	343.795	511.414	420.172	126.395	110.082	336.58	1067.26	186.818
PheGAA	tRH5	2.20266	3.08579	0.315435	1.57555	1.53819	0.821002	0.367386	2.22608	0.617894	0.713638	0.615914	0.990971	1.0276	0.238274	0.755934	1.23783	0.7526
ProTGG	Full	2866.22	3173.14	4508.83	4629.37	4713.03	4606.64	7730.16	7559.4	7324.51	6172.08	3070.13	3064.58	1099.02	2203.55	1607.68	4791.33	1523.2
ProTGG	Other	790.205	1059.14	944.728	1121.79	1113.65	867.526	2139.65	3013.74	1856.15	2247.07	1352.96	1197.34	171.994	477.262	452.237	1465.63	332.012
ProTGG	tRF2	0	0	0	0	0	0	0	0	0	0	0	0	0	0	0	0	0
ProTGG	tRF3	1.92733	2.13631	1.26174	3.54499	2.46111	0.273667	1.83693	3.33912	0.308947	0.356819	0.205305	1.48646	0.12845	0.238274	0.377967	1.42121	0.231569
ProTGG	tRF5	0	0.237368	0.315435	0.393888	1.23056	0	0	0.371014	0.308947	0.178409	0	0	0.38535	0	0.188983	0.229227	0.231569
ProTGG	tRH3	1074.35	1231.23	1016.96	1483.78	1598.18	619.857	1972.13	1971.57	2086.94	1213.01	1258.93	1077.68	113.55	362.176	457.34	1335.43	279.272
ProTGG	tRH5	1.37666	2.13631	1.26174	2.36333	3.07639	0	2.93908	2.5971	2.47157	0.356819	1.43713	1.23871	0.899149	0.953094	0.188983	1.62751	0.694707
SerGCT	Full	4002.51	3730	5778.45	6599.6	5755.92	5050.53	6768.34	6782.87	5966.38	3287.02	3826.27	4298.34	1339.35	3306.76	3111.05	4880.66	2360.09
SerGCT	Other	473.297	684.57	608.474	607.77	796.477	375.472	725.954	1047.37	670.415	260.835	564.588	529.426	110.21	340.493	783.147	581.182	372.305
SerGCT	tRF2	0	0	0	0	0	0	0	0	0	0	0	0	0	0	0	0	0
SerGCT	tRF3	0.275333	0	0.315435	0	0.615278	0	0	0.371014	0	0	0	0	0	0	0.188983	0.114614	0.0578923
SerGCT	tRF5	0	0	0	0	0	0	0	0	0	0	0	0	0	0	0	0	0
SerGCT	tRH3	105.728	131.027	166.234	159.919	233.19	78.5425	233.657	341.333	177.027	65.6547	127.084	117.182	3.5966	22.1594	43.2772	149.066	20.2623
SerGCT	tRH5	0	1.42421	1.26174	0.393888	0.615278	0	1.46954	1.48405	1.54473	0.356819	1.02652	1.98194	0.2569	0.238274	0.944917	0.939831	0.463138
SerTGA	Full	348.021	338.962	696.48	658.975	774.942	628.067	940.874	1033.27	1043.62	1374.64	736.223	760.57	117.917	368.847	385.526	790.191	260.863
SerTGA	Other	606.558	628.313	668.091	1134.79	1330.85	250.679	1174.53	1058.5	988.012	1653.5	1251.13	1129.71	124.468	335.489	520.46	1014.58	297.045
SerTGA	tRF2	0	0	0	0	0	0	0	0	0	0	0	0.247743	0	0	0	0.0229227	0
SerTGA	tRF3	43.2273	25.161	50.1542	168.978	93.8299	16.42	60.986	55.6521	44.4883	25.3341	88.0758	86.4622	2.569	20.4915	57.073	59.5073	23.62
SerTGA	tRF5	0.550666	0.474736	0	0.787777	0.922917	0	0.367386	0.742027	0.617894	0	0.821219	0.495486	0.2569	0.238274	0.188983	0.458454	0.231569
SerTGA	tRH3	841.693	815.122	1240.92	1653.54	1652.02	539.398	2317.47	2466.87	1839.47	2067.77	1396.28	1245.4	109.825	411.26	545.595	1473.77	316.555
SerTGA	tRH5	12.9406	20.8884	14.51	15.3616	25.2264	5.19968	13.9607	15.2116	12.6668	2.85455	12.7289	12.3871	0.899149	2.14446	4.15764	13.043	2.19991
ThrTGT	Full	4004.17	3799.31	4259.63	4930.69	4919.45	4626.07	6925.59	7355.72	7044.3	3761.23	2834.23	2944.92	2037.22	2011.51	1938.97	4532.23	2000.87
ThrTGT	Other	351.325	480.433	334.676	355.681	430.694	369.998	663.131	760.578	810.059	216.767	191.344	172.677	131.661	148.921	254.372	397.411	173.445
ThrTGT	tRF2	0	0	0	0	0	0	0	0	0	0	0	0	0	0	0	0	0
ThrTGT	tRF3	0	0.237368	0	0	0	0.273667	0.367386	0	0	0.178409	0	0	0.12845	0	0	0.0916908	0.0578923
ThrTGT	tRF5	0	0	0	0	0.307639	0	0	0.371014	0	0.356819	0	0	0.2569	0	0.188983	0.0916908	0.173677
ThrTGT	tRH3	2144.57	2469.58	2510.55	3424.07	2514.64	1864.22	3165.03	3764.68	3195.13	1265.99	1429.95	1420.8	743.211	699.095	1162.06	2263.18	860.8
ThrTGT	tRH5	2.20266	1.89894	0.946305	1.57555	2.76875	1.36834	4.04124	6.67825	4.94315	1.24887	1.84774	1.23871	1.15605	1.42964	1.51187	2.36104	1.33152
TrpTCA	Full	1705.69	1769.58	1968.63	1967.08	2234.38	2444.94	3774.52	3650.78	3819.2	2241.54	1208.42	1163.4	649.828	652.393	628.937	2216.72	644.052
TrpTCA	Other	484.311	842.182	401.864	788.958	944.451	175.147	907.81	959.442	958.353	166.456	235.895	199.185	68.7207	65.0487	159.313	534.993	95.5801
TrpTCA	tRF2	0	0	0	0	0	0	0	0	0	0	0	0	0	0	0	0	0
TrpTCA	tRF3	132.435	179.213	78.8587	259.178	162.741	34.7558	138.504	138.388	159.417	27.6535	64.0551	64.4131	14.2579	16.9174	57.8289	109.869	28.2514
TrpTCA	tRF5	0.275333	0.474736	0.315435	0	0.615278	0	0	1.11304	0.308947	0	0.205305	0.495486	0.2569	0.238274	0.377967	0.297995	0.289461
TrpTCA	tRH3	703.476	1020.45	706.574	1147.79	1041.36	361.241	1170.49	1406.51	1178.94	329.522	406.914	358.484	103.274	108.891	260.797	751.452	152.893
TrpTCA	tRH5	5.23133	8.78262	2.83891	3.54499	7.0757	2.18934	5.1434	5.93622	8.34156	1.07046	3.28488	2.47743	1.92675	1.90619	3.96865	4.447	2.54726
TyrGTA	Full	1245.88	1249.03	2517.8	2256.59	2858.27	2057.98	3750.64	3786.94	4162.13	2726.1	1910.77	1851.88	324.079	1014.33	1026.75	2435.74	707.038
TyrGTA	Other	127.204	157.85	199.039	284.387	413.159	103.72	333.219	347.269	327.793	163.78	170.403	159.051	26.9745	53.135	85.9875	217.674	51.4083
TyrGTA	tRF2	0	0	0	0	0	0	0	0	0	0	0	0	0	0	0	0	0
TyrGTA	tRF3	3.02866	2.13631	3.78522	13.3922	11.3826	0.547335	5.87817	4.45216	3.70736	0.535228	4.72201	2.72517	0	0.714821	0.944917	4.17193	0.463138
TyrGTA	tRF5	0.275333	1.18684	0.315435	0.393888	0.922917	0.273667	0	0	0	0.178409	0.205305	0.247743	0.12845	0	0.377967	0.343841	0.173677
TyrGTA	tRH3	116.741	182.773	206.925	332.442	394.701	50.3548	297.582	431.118	275.272	77.4297	130.574	103.556	4.49575	20.2533	48.1908	195.118	21.7096
TyrGTA	tRH5	15.694	25.6358	19.8724	23.2394	34.1479	11.494	22.4105	33.3912	21.0084	4.46024	17.0403	15.8555	1.41295	1.90619	7.74832	19.0488	3.47354
ValTAC	Full	4339.8	4488.39	7786.51	8082.59	7625.45	8107.67	13588.5	12757.3	12814.2	7461.44	5065.69	5053.7	3112.08	3573.63	2908.46	7656.94	3161.84
ValTAC	Other	6583.21	6825.76	7225.67	8246.05	7862.33	7057.06	12139.9	12331	11339.3	7000.79	5093.41	5324.98	3082.93	4131.9	4190.9	7710.69	3677.2
ValTAC	tRF2	0.275333	0.237368	0.946305	0	0.307639	0	0	0	0	0	0	0.247743	0.12845	0	0.188983	0.160459	0.115785
ValTAC	tRF3	1.37666	1.18684	1.26174	0.393888	2.15347	0.821002	3.67386	2.96811	3.70736	0.356819	0.821219	0.495486	0.12845	0.476547	0.188983	1.44413	0.231569
ValTAC	tRF5	3.30399	3.32315	1.89261	3.54499	5.22986	1.09467	6.24555	2.96811	2.78052	0.356819	1.43713	0.495486	0.5138	0.238274	1.1339	2.45273	0.636815
ValTAC	tRH3	118.668	166.87	79.4896	150.465	197.504	68.6905	332.484	318.33	327.175	97.2332	107.374	81.2596	49.1963	34.3114	51.9704	157.685	46.4296
ValTAC	tRH5	18.172	32.0447	11.6711	17.725	36.3014	9.85203	48.4949	42.6666	48.1957	8.02843	18.888	10.6529	7.96389	4.28892	6.23645	23.3812	6.54183

## Sheet: MACS2 peaks (Genomic)
ID	Chr	Position (left end)	Position(right end)	High confidence	Strand	Pileup	Score	FC	log10p	log10q	Is agotron	Is mirtron	Overlapped AGO1-4 CCR	Peak location	Strandeness	Peak size	Peak sequence	Is fulllength intron	Peak type	Sense strand feature name	Sense strand RBP	Antisense strand type	Antisense strand feature name	Antisense strand RBP	MFE (kcal/mol)	phastCon (Primatesl)	phastCon (Mammals)	phastCon (Vertebrate)	ID of the overlapped transcriptome peak(s)	p_val	Comments
1	chr1	1168494	1168977	Y	+	7	134	7.83753	18.0807	13.4227	.	.	.	exon	sense	483	CAAGCAGAGCCTGGAGGACATGCTGGAGAAGCACGCGACGCTGGCGCGCGAGGGCCGCCTGTGCAAGCGCGAGGTGCAGCTGCGCCTGTCCTACGTGTACGACTGGTCCGCGCCGCCCTCGCAGTGCTGCCAGAGAAGGGAGGGCATCCCCTGAGCCGCCGCGGCCCGGCCCTCCGGGACACCTGCTTCACCCGGCGGCGCCTTGGGGCAGGTGCCGAGCGGGCGCACTACGCCCGGGCCCCAAGGCCCCCGTCCCGCAGCCACGCTTGTGGTCGCTGCGTCCCGGTCTGCGTTTGGGAGACCCCTGGGGGTTGCCGGGGCAGCGCGCCGTGTCCAGGTGGAGGTGCCCGTTCCTGGACCTCAGCGAGCCTGAGCCGGGCCCGGCCGCACGCTGACCCC…	.	RBP	B3GALT6	RBM15	.	.	.	-237.8	0.314029	0.24193	0.294536	T12974	0.873	ID: MACS2 assigned ID
2	chr1	3551643	3551723	Y	-	13	284	13.6621	33.4454	28.4814	.	.	ALL_AGO|slc13649_chr1|43|5|7|0.71|COORDS=chr1-:3541552	intron	sense	80	GTGGGAACCAGTGCAGGGCACTCAGGAAGTCCGACCGCCCAGCGGGCCGGGCCCTGCCTCACCTGTGCATGGTTTCCTTC	Y	RBP	WRAP73	SF3A3	.	.	.	-41.8	0.029225	0.0593625	0.06195	T22533	0.003	Chr: choromosome name
3	chr1	6246681	6246848	Y	-	7	136	7.84728	18.2997	13.6582	.	.	.	exon	sense	167	TTGAAGAAGAATAATCTACGTGACTGGTTGCGCGTAGTTGCTAACAGCAAAGAGAGTTACGAATTACGTTACTTCCAGATTAACCAGGACGAAGAAGAGGAGGAAGACGAGGATTAAATTTCATTTATCTGGAAAATTTTGTATGAGTTCTTGAATAAAACTTGGGA	.	Long RNA	RPL22	.	.	.	.	-28.4	0.809617	0.80488	0.819168	No	0.671	Position: chromosomal coordinates of the peak
4	chr1	6253016	6253105	Y	-	8	145	8.7367	19.2596	14.5847	.	.	.	exon	sense	89	TTGCAAGAAAGGATCAAAGTGAACGGAAAAGCTGGGAACCTTGGTGGAGGGGTGGTGACCATCGAAAGGAGCAAGAGCAAGATCACCGT	.	RBP	RPL22	SRSF1	.	.	.	-16.4	0.903966	0.830449	0.90118	No	0.293	Pileup: maximum coverage of the peak
5	chr1	15753653	15753733	Y	+	5	83	5.8681	12.7551	8.32977	.	.	.	exon	sense	80	GATCTTCCGCAAGGCGGCGGCCGGGGAGCTTCAGGAGGACAGCGGGCTGTGCGTGCTGGCCCGCCTCTCTGAGATCGACG	.	RBP	EFHD2	LIN28B	.	.	.	-31	0.704063	0.897938	0.952887	No	0.678	Score: Score assigned by MACS2
6	chr1	16119462	16119525	Y	+	7	127	7.80184	17.3768	12.7279	.	.	.	pseudogene	sense	63	AGTGAAACTGACCATTCAGAACAGACAGGCCCAGATTGAGGTGGTGCCTTCTGCCTCTGCCCT	.	Long RNA	RP11-169K16.6	.	.	.	.	-17.1	0.536508	0.555381	0.999619	No	0.158	FC: fold change
7	chr1	16154718	16154873	Y	+	7	147	7.88884	19.4195	14.7016	.	.	.	pseudogene	sense	155	CCGCAGCCATGCCGACCAAGGGCCCGCTGCAGTCGGTGCAGGTCTTCGGACGCAAGAAGACAGCCACAGCTGTGGCGCACTGCAAACGCGGCAATGGTCTCATCAAGGTGAACGGGTGGCCCCTGGAGATGATTGAGCTGCGCATGCTACAATAC	.	Long RNA	RP11-169K16.8	.	.	.	.	-58	0.139103	0.0433548	0.984671	No	0.098	log10p: log10 p-value
8	chr1	22699410	22699473	Y	+	11	147	10.6478	19.4858	14.7675	.	.	.	intergenic	sense	63	aggaatggaatggagtggaatggagtggagtggagtggagtggaatggaatggaatggaatgg	.	Repeats	(GAATG)n	.	.	.	.	0	0.0885873	0.00290476	0.00342857	No	1	log10q: log10 q-value
9	chr1	24019109	24019251	Y	+	16	392	16.7087	44.4549	39.289	.	.	.	exon	sense	142	TGAAAAGGAGAACCCCATGCGGGAACTTCGCATCCGCAAACTCTGTCTCAACATCTGTGTTGGGGAGAGTGGAGACAGACTGACGCGAGCAGCCAAGGTGTTGGAGCAGCTCACAGGGCAGACCCCTGTGTTTTCCAAAGGT	.	RBP	RPL11	SND1	.	.	.	-46.5	0.492239	0.959831	0.973831	T19806	0.069	Peak location: peak location in the overlapped genetic element
10	chr1	24020310	24020400	Y	+	14	320	14.6846	37.145	32.0728	.	.	ALL_AGO|slc1488_chr1|51|2|6|0.33|COORDS=chr1+:23892891	exon	sense	90	AGATCCTTTGGCATCCGGAGAAATGAAAAGATTGCTGTCCACTGCACAGTTCGAGGGGCCAAGGCAGAAGAAATCTTGGAGAAGGGTCTA	.	RBP	RPL11	AARS	.	.	.	-21.3	0.889078	0.964556	0.957144	No	0.224	Strandness: orientation of the peak to the correspon
11	chr1	25161391	25161482	Y	-	5	30	4.83444	6.65374	3.06861	.	.	.	.	sense	91	CGtctccctctccctctcccgtctccctctcccgtctccctctccctctcccgtctccctctccctctccctctcccgtctccctctcccg	.	Repeats	(GGGAGA)n	.	.	.	.	0	0	0	0	No	1	MFE: minimal free energy calculated by RNAfold
12	chr1	25248609	25248700	Y	-	8	164	8.83725	21.1801	16.4543	.	.	.	.	sense	91	aaaaaaaaaaaaaagaaagaaaggaaagaaagaaaagaaaggaaaggaaggaaggaagggagggaaggaaaagaaggaagggaaaaaaaga	.	Repeats	AluJb	.	.	.	.	0	0.0295604	0.0134835	0.0154286	No	1	phastCon: phastCon score (0-1). Vertebrate contain 46 species including human; Mammals, 33 placental mammals including human; Primates, 10 primates including human
13	chr1	26126955	26127064	Y	-	5	91	5.90305	13.5707	9.12104	.	.	.	.	sense	109	ccgcctcccgtgtcccctccttcccgtgctccctcccgtccagtccccctccgccctccgcctcccccGACTCGTCCATGCCCATGTCCCCCCTGCTGCCGAGGCTGGG	.	Repeats	G-rich	.	.	.	.	-12.7	0.037	0.000522936	0.000623853	No	0.977
14	chr1	26606566	26606700	Y	+	21	481	21.2794	53.4102	48.1479	.	.	.	exon	sense	134	CGGCGGCGGCGTCGTCTCCCGGCAGTGCAGCTGCCGCTACCGCCGCCCTCTGCCCGCCGGCCCGTCTGTCTACCCCCAGCATGAGCGGCCTGCGCGTCTACAGCACGTCGGTCACCGGCTCCCGCGAAGTAAGT	.	RBP	SH3BGRL3	DDX3X	.	.	.	-49.2	0.669112	0.688134	0.602052	T3088	0.899
15	chr1	26607268	26608012	Y	+	15	351	15.6766	40.2971	35.1838	.	.	.	exon	sense	744	AGAGCGAGGTGACCCGAATCCTGGATGGGAAGCGCATCCAATACCAGCTAGTGGACATCTCCCAGGACAACGCCCTGAGGGATGAGATGCGAGCCTTGGCAGGCAACCCCAAGGCCACCCCACCCCAGATTGTCAACGGGGACCAGTACTGTGGGGTATGGGCTGGGGGACGGGGGGGTGGGGGGAGTGTTGGAAGAGGACTCTAGCCAGGGTCATATCTGCCACAAAGCACTTGGGCCCCCTGCATTCAGGTGACCACCCCTCGCCTCCCCTTCTCCAGGACTATGAGCTCTTCGTGGAGGCTGTGGAACAAAACACGCTGCAGGAGTTCCTGAAGCTGGCTTGAGTCAAGCCTGTCCAGAGTTCCCCTGCTGGACTCCATCACCACACTCCCCCCAG…	.	Long RNA	SH3BGRL3	.	Long RNA	UBXN11	.	-281.4	0.580785	0.551719	0.509368	T3088,T5931	0
16	chr1	26644448	26644534	Y	+	10	189	10.6397	23.7873	18.9679	.	.	.	exon	sense	86	AGACAGCCCTGAGATCACCTAAAAAGCTGCTACCAAGACAGCCACGAAGATCCTACCAAAATGAAGCGCTTCCTCTTCCTCCTACT	.	RBP	CD52	YBX3	Long RNA	UBXN11	.	-7.6	0.165093	0.317721	0.33014	No	0.732
17	chr1	26646670	26646959	Y	+	9	177	9.7523	22.5216	17.7198	.	.	.	exon	sense	289	GGACTCTCAGGACAAAACGACACCAGCCAAACCAGCAGCCCCTCAGCATCCAGCAACATAAGCGGAGGCATTTTCCTTTTCTTCGTGGCCAATGCCATAATCCACCTCTTCTGCTTCAGTTGAGGTGACACGTCTCAGCCTTAGCCCTGTGCCCCCTGAAACAGCTGCCACCATCACTCGCAAGAGAATCCCCTCCATCTTTGGGAGGGGTTGATGCCAGACATCACCAGGTTGTAGAAGTTGACAGGCAGTGCCATGGGGGCAACAGCCAAAATAGGGGGGTAATGAT	.	RBP	CD52	DDX6	.	.	.	-90.7	0.0365121	0.0755606	0.0774118	T11971	0.03
18	chr1	29308977	29309156	N	-	16	337	16.3828	38.7743	33.73	.	.	.	pseudogene	sense	179	CTTTTTGCTGTAGGCCCGAGTGGTTGCTGCCGAAATGGGCAAGTTCATGAAACCTGGGAAGGTGGTGCTTGTCCTGGCTGGACGCTACTCTGGATGCAAAGCCGTCATCGTGAAGAACATTGATGATAGCACCTCAGATTGCCCCTACAGCCATGCTCTGGTGTCTGGAATTGACCACT	.	Long RNA	RP4-604A21.1	.	RBP	EPB41	AARS	-56.5	0	0	0	No	0.313
19	chr1	32757683	32757804	Y	+	10	220	10.811	26.9393	22.0508	.	.	.	exon	sense	121	ccccTCCCCCCTGGGTCGGACGCTGAGCGGAGCCGCGGGCGGGAGGGCGGACGGACCGACTGACGGTAGGGACGGGAGGCGAGCAAGATGGCGCAGACGCAGGGCACCCGGAGGAAAGTCT	.	RBP	HDAC1	FMR1	.	.	.	-43.9	0.987653	0.923174	0.880752	T11812	0.973
20	chr1	32801727	32801834	Y	-	5	83	5.86738	12.7408	8.31952	.	.	.	exon	sense	107	GGCATTCTGGCGCGGAGCGGAGCGGCGGCGGGCGCAGCTAGCGGGTCGGCCGCGGAGCGGAGGTGCAGCTCGGCTTCCCCCGGCACCCCTCCCCCTCGGGCGCCAGC	.	RBP	MARCKSL1	DDX3X	.	.	.	-51.3	0.11514	0.462224	0.424458	No	0.951
21	chr1	33461573	33461653	Y	-	8	115	8.42848	16.1047	11.5398	.	.	.	.	sense	80	tagaaggaagaagaaaggaggaagggagggagggaggaagggaagaagaaagaggaggaagagagaagaaaaggaaAAGA	.	Repeats	CT-rich	.	.	.	.	0	0.0531625	0.0332625	0.0391	No	1
22	chr1	42965457	42965626	Y	-	9	203	9.86422	25.1774	20.3572	.	.	.	intron	antisense	169	GTGGGGTGGGACGACAGTGAAATCTAGAGTAAAACCAAGCTGGCCCAAGGTGTCCTGCAGGCTGTAATGCGGTTTAATCAGAGTGCCATTTTTTTTGTTCAAATGATTTTAATTATTGGAATGCACAATATTTTAAATACGCAAATAAAAAGTTTAAAAACTTAAAAAA	.	Antisense	.	.	Long RNA	CCDC30	.	-28.6	0.724686	0.821757	0.921645	No	0.642
23	chr1	42965882	42965982	Y	-	23	634	23.6825	68.7421	63.4049	.	.	.	pseudogene	sense	100	TGGAGAAATTCGATAAGTCGAAACTGAAGAAGACAGAGACGCAAGAGAAAAATCCACTGCCTTCCAAAGAAACGATTGAACAGGAGAAGCAAGCAGGCGA	.	Long RNA	RP11-163G10.3	.	Long RNA	CCDC30	.	-12.4	0.51501	0.97055	0.99278	T17863	0.397
24	chr1	43148141	43148402	Y	+	5	90	5.9001	13.4913	9.01445	.	.	.	.	sense	261	TGAGCAGCCccaccgccgccgccggcctagttaccatcacaccccgggaggagccgcagctgccgcagccggccccagtcaccatcaccgcaaccatgagcagcgaggccgagacccagcagccgcccgccgccccccccgccgcccccgccctcagcgccgccgacaccAAGCCCGGCACTACGGGCAGCGGCGCAGGGAGCGGTGGCCCGGGCGGCCTCACATCGGCGGCGCCTGCCGGCGGGGACAAGAAGGTCATCG	.	Repeats	(CCG)n	.	.	.	.	-114.5	0.566843	0.993709	0.998433	No	0.467
25	chr1	43167715	43168020	Y	+	7	144	7.87956	19.1373	14.4424	.	.	.	exon	sense	305	TGAAGACCTAAAGTGCTTGCTTTTTGCCCGTTGACCAGATAAATAGAACTATCTGCATTATCTATGCAGCATGGGGTTTTTATTATTTTTACCTAAAGACGTCTCTTTTTGGTAATAACAAACGTGTTTTTTAAAAAAGCCTGGTTTTTCTCAATACGCCTTTAAAGGTTTTTAAATTGTTTCATATCTGGTCAAGTTGAGATTTTTAAGAACTTCATTTTTAATTTGTAATAAAAGTTTACAACTTGATTTTTTCAAAAAAGTCAACAAACTGCAAGCACCTGTTAATAAAGGTCTTAAATAAT	.	RBP	YBX1	TIA1	.	.	.	-73	0.987741	0.999049	0.998275	T19070	0
26	chr1	45241704	45241781	Y	+	7	139	7.85868	18.5737	13.9053	.	.	ALL_AGO|slc3631_chr1|52|8|14|0.57|COORDS=chr1+:45014290	exon	sense	77	GGCATCTCTCGGGACAACTGGCACAAGCGCCGCAAAACCGGGGGCAAGAGAAAGCCCTACCACAAGAAGCGGAAGTA	.	RBP	RPS8	SRSF7	.	.	.	-19.1	0.986688	0.999558	0.998351	T11412,T25378,T24103	0.17
27	chr1	45244265	45244409	Y	+	12	272	12.7578	32.1836	27.2001	.	.	.	exon	sense	144	CGGGACAGTGTGGCCGAGCAGATGGCTATGTGCTAGAGGGCAAAGAGTTGGAGTTCTATCTTAGGAAAATCAAGGCCCGCAAAGGCAAATAAATCCTTGTTTTGTCTTCACCCATGTAATAAAGGTGTTTATTGTTTTGTTCCC	.	RBP	RPS8	FUBP3	.	.	.	-33.9	0.624389	0.783729	0.736528	T24103,T14969,T21823,T11413,T22853,T24007	0.618
28	chr1	48661892	48662020	Y	-	67	2107	66.8576	216.579	210.749	.	.	.	intergenic	sense	128	gggccgggcgcggtggctcacgcctgtaatcccagctctcagggaggctaagaggcgggaggatagcttgagcccaggagttcgagacctgcctgggcaatatagcgagaccccgttctccagaaaaa	.	Repeats	FLAM_C	.	.	.	.	-47.9	0.012	0.012	0.013	No	0.123
29	chr1	53238047	53238347	N	-	8	137	8.67327	18.3904	13.7435	.	.	ALL_AGO|slc7012_chr11|42|108|148|0.73|COORDS=chr11-:17053701	pseudogene	sense	300	GCCTTTCGTTGCCTGATCGCCGCCATCATGGGTCGTATGCGTGCTCCTGAGAAGGGCCTGTCCCAGTCGGCTTTACCCTATCGACGCAGCTTCCCCACTTGGTTGAAGTTGACATCTGACGACGTGAAGGAGCAGATTTACAAACTGGCCAAGAAGGGCCTTACTCCTTCACAGATCGGTGTAATCGTGAGAGAATCACATGGTGTTGCACAAGTACGTTTTGTGACAGGCAATAAAATTTTAAGAATTCTTAAGTCTAAGGGACTTGCTCCTGATCTTCCTGAAGATCTCTACCATTTA	.	Long RNA	RP11-159C21.4	.	Long RNA	ZYG11B	.	-82.7	0	0	0	No	0.376
30	chr1	53662495	53662613	Y	+	9	194	9.83349	24.2792	19.4448	.	.	ALL_AGO|slc4174_chr1|43|4|5|0.80|COORDS=chr1+:53435150	exon	sense	118	GGAGAAGTGCCTCAGGAGTCCTGACGCAGTGTCTTGGGCGCTAACGGCGGCGGCGGCCTTGTGTTTAGACTCCAGAACTCCCCACTTGCCGCGTTCTCGCCGCCGCAGGCTCCCGGGA	.	RBP	CPT2	DDX3X	.	.	.	-51	0.0903644	0.0267034	0.0222627	T38528	0.087
31	chr1	54717368	54717466	Y	-	8	124	8.54912	17.0811	12.4622	.	.	.	intron	sense	98	GTAGAGAGGGCAGGGTGGGCCTAGGGTGGCTGGGGATGCCAGGAGGGGCTCCTCCTCCCTCCACTCCTGCCATCCCATGACGCGCCTCCTCTCTCACG	Y	RBP	SSBP3	RBM22	.	.	.	-49.5	0.0901531	0.0632245	0.0492755	No	0.007
32	chr1	63070311	63070495	Y	+	5	90	5.9001	13.4913	9.01445	.	.	.	exon	sense	184	TGGTGGCATGATGAGTGTGGAGAAAACAACCTAAATGGTAAATATAACAAACCAAGAGCAAAATCTAAGCCAGAGAGGAGAAGAGGATTATCTTGGAAGTCTCAAAATGGAAGGTTATACTCTATAAAATCAACCAAAATGTTGATCCATCCAACAGATTCAGAAAGCTTTGAATGAACTGAGG	.	Long RNA	ANGPTL3	.	Long RNA	DOCK7	.	-33.1	0.75669	0.610799	0.652625	No	0.09
33	chr1	75210275	75210343	Y	+	26	707	26.5608	76.1478	70.7189	.	.	.	intron	sense	68	ttgtcccatctgggtcgccaaaaTGTGTCCCATCTGGGTCGCCAAATGTGTCCCATCTGGGTTGCCAA	.	RBP	TYW3	GPKOW	.	.	.	-24	0.0346618	0.0345588	0.0356618	No	0.015
34	chr1	77594762	77594916	Y	+	11	249	11.8002	29.9424	24.9953	.	.	.	pseudogene	sense	154	gctctttCCCTAAGCAGCCTGAGGTAATCTGTGAAAATGGTTCGCTACTCACTTGACCCGGAGAACCCCACGAAATCATGCAAATCAAGAGGTTCCAATCTTCGTGTTCACTTTAAGAACACTCGTGAAACTGCTCAGGCCATCAAGGGTATGC	.	Long RNA	RP4-706A16.3	.	Long RNA	PIGK	.	-36.2	0.955006	0.830526	0.880481	No	0.2
35	chr1	77595056	77595361	Y	+	24	640	24.5837	69.4796	64.0968	.	.	.	pseudogene	sense	305	AGTGCTGAATTTTTGCTGCACATGCTTAAAAACACAGAGAGTAATGCTGAACTTAAGGGTTTAGATGTAGATTCTCTGGTCATTGAGCATATCCAAGTGAACAAAGCACCTAAGATGCGCCGCCGGACCTACAGAGCTCATGGTCGGATTAACCCATACATGAGCTCTCCCTGCCACATTGAGATGATCCTTACGGAAAAGGAACAGATTGTTCCTAAACCAGAAGAGGAGGTTGCCCAGAAGAAAAAGATATCCCAGAAGAAACTGAAGAAACAAAAACTTATGGCACGGGAGTAAATTCAGCA	.	Long RNA	RP4-706A16.3	.	Long RNA	PIGK	.	-87.8	0.80462	0.904321	0.977898	T22586	0
36	chr1	93301754	93301927	Y	+	14	332	14.735	38.3011	33.219	.	.	.	exon	sense	173	TAGGTTTGGCATGGACAAGATCTATGAAGGCCAAGTGGAGGTGACTGGTGATGAATACAATGTGGAAAGCATTGATGGTCAGCCAGGTGCCTTCACCTGCTATTTGGATGCAGGCCTTGCCAGAACTACCACTGGCAATAAAGTTTTTGGTGCCCTGAAGGGAGCTGTGGATG	.	RBP	RPL5	SUB1	Long RNA	FAM69A	.	-59.8	0.597514	0.987382	0.982723	T39321,T39257,T39176	0
37	chr1	93303027	93303188	Y	+	11	229	11.7028	27.8327	22.92	.	.	.	exon	sense	161	TGGTTATGATTCTGAAAGCAAGGAATTTAATGCAGAAGTACATCGGAAGCACATCATGGGCCAGAATGTTGCAGATTACATGCGCTACTTAATGGAAGAAGATGAAGATGCTTACAAGAAACAGTTCTCTCAATACATAAAGAACAGCGTAACTCCAGACA	.	RBP	RPL5	SRSF7	Long RNA	FAM69A	.	-23.4	0.916925	0.950453	0.981398	T39321,T39257,T39176	0.85
38	chr1	93307320	93307457	Y	+	6	115	6.88344	16.1078	11.5162	.	.	.	exon	sense	137	AGGTGGAACCGTCCCAAAATGTCCCTTGCTCAGAAGAAGGATCGGGTAGCTCAAAAGAAGGCAAGCTTCCTCAGAGCTCAGGAGCGGGCTGCTGAGAGCTAAACCCAGCAATTTTCTATGATTTTTTCAGATATAGA	.	RBP	RPL5	RPS5	Long RNA	FAM69A	.	-31.5	0.704131	0.846715	0.937036	T39176	0.505
39	chr1	96912671	96912772	Y	+	9	201	9.85721	24.956	20.1152	.	.	.	pseudogene	sense	101	CTGAAAGCTGAGCGTGAACGTGGTATCACCATTGATATCTCCTTGTGGAAATTTGAGACCAGCAAGTACTATGTGACTATCATTGATGCCCCAGGACACAG	.	Long RNA	EEF1AL9	.	.	.	.	-17.1	0.922931	0.928406	0.999851	No	0.879
40	chr1	96913167	96913272	Y	+	28	705	28.2109	76.0029	70.5744	.	.	.	pseudogene	sense	105	TGCTTGAGGCTCTGGACTGCATCCTACCACCAACTCGTCCAACTGACAAGCCCTTGCGCCTGCCTCTCCAGGATGTCTACAAAATTGGTGGTATTGGTACTGTTC	.	Long RNA	EEF1AL9	.	.	.	.	-22	0.921	0.923276	0.997457	T16892	0.614
41	chr1	96913451	96913688	Y	+	10	205	10.7424	25.433	20.5642	.	.	.	pseudogene	sense	237	GGCAACGTTGCTGGTGACAGCAAAAATGACCCACCAATGGAAGCAGCTGGCTTCACTGCTCAGGTGATTATCCTGAACCATCCGGGCCAAATAAGCTCTGGCTATGCACCTGTATTGGATTGCCACACAGCTCACATTGCATGCAAGTTTGCTGAGCTGAAGGAAAAGATTGATCGCCGTTCTGGTAAAAAGCTGGAAGATGGCCCTAAATTCTTGAAGTCTGGTGATGCTGCCATT	.	Long RNA	EEF1AL9	.	.	.	.	-69.9	0.875709	0.879844	0.998616	T16893	0.086
42	chr1	96913782	96913932	Y	+	16	388	16.6915	44.0239	38.8606	.	.	.	pseudogene	sense	150	TTGCGGTGGGTGTCATCAAAGCAGTGGACAAGAAGGCTGCTGGAGCTGGCAAGGTCACCAAGTCTGCCCAGAAAGCTCAGAAGGCTAAATGAATATTATCCCTAATACCTGCCACCCCACTCTTAATCAGTGGTGGAAGAACGGTCTCAG	.	Long RNA	EEF1AL9	.	.	.	.	-37.2	0.98326	0.983693	0.948693	T16893	0.581
43	chr1	97144392	97145166	Y	-	19	506	19.7354	55.8448	50.614	.	.	.	pseudogene	sense	774	TAGAAGAGAAGAAGAAGGAGGTTCCTGCTGTTCCAGAAACCCTTAAGAAAAAGCGAAGGAATTTCGCAGAGCTGAAGATCAAGCGCCTGAGAAAGAAGTTTGCCCAAAAGATGCTTCGAAAGGCAAGGAGGAAGCTTATCTATGAAAAAGCAAAGCACTATCACAAGGAATATAGGCAGATGTACAGAACTGAAATTCGAATGGCGAGGATGGCAAGAAAAGCTGGCAACTTCTATGTACCTGCAGAACCCAAATTGGCGTTTGTCATCAGAATCAGAGGTATCAATGGAGTGAGCCCAAAGGTTCGAAAGGTGTTGCAGCTTCTTCGCCTTCGTCAAATCTTCAATGGAACCTTTGTGAAGCTCAACAAGGCTTCGATTAACATGCTGAGGATTGTAG…	.	Long RNA	RP11-122C9.1	.	.	.	.	-200.4	0.800844	0.889379	0.970506	No	0.126
44	chr1	102251839	102252167	Y	-	10	220	10.8102	26.9177	22.0674	.	.	.	pseudogene	sense	328	AGAGATCCTGAAGAGATTGAAAAAGAAGAGCAGGCTGCTGCTGAGAAGGCAGTGACCAAGGAGGAATTTCAGGGTGAATGGACTGCTCCAGCTCCTGAGTTCACTGCTACTCAGCCTGAGGTTGCAGACTGGTCTGAAGGTGTACAGGTGCCCTCTGTGCCTATTCAGCAATTCCCTACTGAAGACTGGAGCGCTCAGCCTGCCACGGAAGACTGGTCTGCAGCTCCCACTGCTCAGGCCACTGAATGGGTAGGAGCAACCACTGACTGGTCTTAAGCTGTTCTTGCATAGGCTCTTAAGCAGCATGGAAAAATGGTTGATGGAAAAT	.	Long RNA	RP11-556K13.1	.	Long RNA	RP11-411H5.1	.	-110	0.808845	0.84189	0.885079	No	0.045
45	chr1	109535211	109535407	Y	+	5	94	5.91663	13.9689	9.44617	.	.	.	pseudogene	sense	196	ACTTAAGGGTTTAGATGTAGATTCTCTGGTCATTGAGCATATCCAAGTGAACAAAGCACCTAAGATGCGCCGCCGGACCTACAGAGCTCATGGTCGGATTAACCCATACATGAGCTCTCCCTGCCACATTGAGATGATCCTTACGGAAAAGGAACAGATTGTTCCTAAACCAGAAGAGGAGGTTGCCCAGAAGAAA	.	Long RNA	RP11-20O24.4	.	Long RNA	WDR47	.	-51.6	0.960214	0.978449	0.999898	No	0.065
46	chr1	112437728	112437801	Y	-	5	83	5.86738	12.7408	8.31952	.	.	.	.	sense	73	gtctccctccttccccctccttccttctccttctccctccccacttctccctcctccccttcctcttccttcc	.	Repeats	GA-rich	.	.	.	.	0	0.251384	0.00232877	0.00210959	No	1
47	chr1	112532350	112532502	Y	+	5	84	5.87269	12.8492	8.41961	.	.	.	intergenic	sense	152	gccactgccgccgccactgccgccgccactgccgccgccgccgctgccgcagcctccgccgcTCCAGCCCCGGCTCGGCAGCGCGTCCCCTCCCCGCCTCGCCGCTCCGCTCGCGGGCTCGCGGGCTCCCTCGCTCTCTCCCTTcccccgcc	.	Repeats	(CCG)n	.	.	.	.	-53.4	0.245553	0.309862	0.120066	No	0.365
48	chr1	145440270	145440510	Y	+	6	116	6.88987	16.2826	11.6872	.	.	ALL_AGO|slc7509_chr1|69|6|16|0.38|COORDS=chr1+:144151697;ALL_AGO|slc7508_chr1|43|7|8|0.88|COORDS=chr1+:144151625;ALL_AGO|slc7511_chr1|42|7|27|0.26|COORDS=chr1+:144151825	exon	sense	240	GATGAGATTTCCATCCATGCTGACTTTGAGAATACATGTTCCCGAATTGTGGTCCCCAAAGCTGCCATTGTGGCCCGCCACACTTACCTTGCCAATGGCCAGACCAAGGTGCTGACTCAGAAGTTGTCATCAGTCAGAGGCAATCATATTATCTCAGGGACATGCGCATCATGGCGTGGCAAGAGCCTTCGGGTTCAGAAGATCAGGCCTTCTATCCTGGGCTGCAACATCCTTCGAGTT	.	RBP	TXNIP	UCHL5	.	.	.	-61.4	0.978379	0.989142	0.978404	No	0.845
49	chr1	145441352	145441608	Y	+	7	141	7.86679	18.7823	14.1002	.	.	.	exon	sense	256	GGAGGTGGTCAGCAGGCAATCTCCTGGGCCTTAAAGGATGCGGACTCATCCTCAGCCAGCGCCCATGTTGTGATACAGGGGTGTTTGTTGGATGGGTTTAAAAATAACTAGAAAAACTCAGGCCCATCCATTTTCTCAGATCTCCTTGAAAATTGAGGCCTTTTCGATAGTTTCGGGTCAGGTAAAAATGGCCTCCTGGCGTAAGCTTTTCAAGGTTTTTTGGAGGCTTTTTGTAAATTGTGATAGGAACTTTGGA	.	RBP	TXNIP	FAM120A	.	.	.	-83.9	0.26148	0.187305	0.189461	T33943	0.003
50	chr1	145442282	145442626	Y	+	10	202	10.7275	25.1583	20.2936	.	.	ALL_AGO|slc7536_chr1|51|7|20|0.35|COORDS=chr1+:144153888;ALL_AGO|slc7532_chr1|55|5|13|0.38|COORDS=chr1+:144153624;ALL_AGO|slc7534_chr1|53|2|10|0.20|COORDS=chr1+:144153802	exon	sense	344	GCCATGAGAAACTAGAGGGCAGGTCTTCATAAAAGCCCTTTGAACCCCCTTCCTGCCCTGTGTTAGGAGATAGGGATATTGGCCCCTCACTGCAGCTGCCAGCACTTGGTCAGTCACTCTCAGCCATAGCACTTTGTTCACTGTCCTGTGTCAGAGCACTGAGCTCCACCCTTTTCTGAGAGTTATTACAGCCAGAAAGTGTGGGCTGAAGATGGTTGGTTTCATGTTTTTGTATTATGTATCTTTTTGTATGGTAAAGACTATATTTTGTACTTAACCAGATATATTTTTACCCCAGATGGGGATATTCTTTGTAAAAAATGAAAATAAAGTTTTTTTAATGG	.	RBP	TXNIP	HNRNPK	.	.	.	-92.1	0.556259	0.450666	0.451936	T33945	0.044
51	chr1	145618303	145618373	Y	+	18	405	18.4292	45.77	40.5887	.	.	.	.	sense	70	TGAGAGAGAAGAGAGAGGGGAGAGAGGAGAGAAaaaagaaaagaaaagaaaaagaaaaagaaagaaaGAA	.	Repeats	(GAAAA)n	.	.	.	.	0	0.233029	0.189	0.214429	No	1
52	chr1	146438347	146438428	Y	+	21	395	20.2828	44.6766	39.5021	.	.	.	.	sense	81	TTGAAaagaaggggaaggggaagaaaagaaggggaagaagatcaaagaagaaaagaagaaggggaagaaaagaaggggaag	.	Repeats	GA-rich	.	.	.	.	0	0.157975	0.160716	0.184136	No	1
53	chr1	149783503	149783928	Y	-	5	83	5.86738	12.7408	8.31952	.	.	ALL_AGO|slc1273_chr6|42|2|6|0.33|COORDS=chr6+:26266477	exon	sense	425	GGTAGTTCGGATTACTTCTTTAAGTCTCTTTTCTCTTTTTTCGCGCAAAAATGCCGGATCCAGCGAAATCCGCTCCTGCTCCCAAGAAGGGCTCCAAAAAGGCTGTTACGAAAGTGCAGAAGAAGGACGGCAAGAAGCGCAAGCGCAGCCGCAAGGAGAGCTACTCCGTTTACGTGTACAAGGTGCTGAAGCAGGTCCACCCCGACACCGGCATCTCGTCCAAGGCCATGGGCATCATGAACTCCTTCGTCAACGACATCTTCGAGCGCATCGCGGGAGAGGCGTCCCGCCTGGCGCACTACAACAAGCGCTCCACCATCACATCCCGCGAGATCCAGACGGCCGTGCGCCTGCTGCTGCCCGGCGAGCTGGCCAAGCACGCCGTGTCCGAGGGCACCA…	.	RBP	HIST2H2BF	UCHL5	.	.	.	-132.8	0.515252	0.799936	0.861607	No	0.873
54	chr1	149804220	149804614	Y	+	8	166	8.84536	21.3831	16.6284	.	.	.	exon	sense	394	AGAAGCTGTCTATCGGGCTCCAGCGGTCATGTCCGGCAGAGGAAAGGGCGGAAAAGGCTTAGGCAAAGGGGGCGCTAAGCGCCACCGCAAGGTCTTGAGAGACAACATTCAGGGCATCACCAAGCCTGCCATTCGGCGTCTAGCTCGGCGTGGCGGCGTTAAGCGGATCTCTGGCCTCATTTACGAGGAGACCCGCGGTGTGCTGAAGGTGTTCCTGGAGAATGTGATTCGGGACGCAGTCACCTACACCGAGCACGCCAAGCGCAAGACCGTCACAGCCATGGATGTGGTGTACGCGCTCAAGCGCCAGGGGCGCACCCTGTACGGCTTCGGAGGCTAGGCCGCCGCTCCAGCTTTGCACGTTTCGATCCCAAAGGCCCTTTTTAGGGCCGAC	.	Long RNA	HIST2H4A	.	.	.	.	-156.3	0.561104	0.634873	0.785038	No	0.2
55	chr1	149812260	149812646	Y	-	9	199	9.85155	24.785	19.9709	.	.	.	exon	sense	386	GAGCGCGCCGGCCACGGGCGGGGTGAAGAAGCCGCACCGCTACCGGCCCGGCACCGTAGCCCTGCGGGAGATCCGGCGCTACCAGAAGTCCACGGAGCTGCTGATCCGCAAGCTGCCCTTCCAGCGGCTGGTACGCGAGATCGCGCAGGACTTTAAGACGGACCTGCGCTTCCAGAGCTCGGCCGTGATGGCGCTGCAGGAGGCCAGCGAGGCCTACCTGGTGGGGCTGTTCGAAGACACGAACCTGTGCGCCATCCACGCCAAGCGCGTGACCATTATGCCCAAGGACATCCAGCTGGCCCGCCGCATCCGTGGAGAGCGGGCTTAAGAAGTGGCGGTTCGGCCGGAGGTTCCATCGTATCCAAAAGGCTCTTTTCAGAGCCACC	.	Long RNA	HIST2H3C	.	.	.	.	-168	0.934627	0.907438	0.918365	T10731	0.238
56	chr1	149813786	149813929	Y	-	7	148	7.89416	19.592	14.8933	.	.	ALL_AGO|slc8761_chr6|51|5|7|0.71|COORDS=chr6-:27968540	exon	sense	143	CAGGCCGTACTGCTCCCTAAGAAGACGGAGAGTCACCACAAGGCAAAGGGCAAGTGAGGCTGACGTCCGGCCCAAGTGGGCCCAGCCCGGCCCGCGTCTCGAAGGGGCACCTGTGAACTCAAAAGGCTCTTTTCAGAGCCACC	.	RBP	HIST2H2AA3	SLBP	.	.	.	-53	0.623126	0.559818	0.588566	T10734	0.052
57	chr1	149814197	149814520	Y	-	6	106	6.84528	15.2319	10.6874	.	.	.	exon	sense	323	AGAGGCTGTGCGCATGACGCTGCGTTATGGTTCGCGAGTTTTCCGCGGCGCGCAATGCGAGGGAGACGAGATTATGTAAATGAGTGGATTCTGGCTGAGCTATCCTATTGGCTATCGGGACAAAATTTGCTTGAGCCAATCAAAGTGCTCCGTGGACAATCGCCGTTCTGTCTATAAAAAGGTGAAGCAGCGGCGTTTTCGGCGACTTTCCCGATCGCCAGGCAGGAGTTTCTCTCGGTGACTACTATCGCTGTCATGTCTGGTCGTGGCAAGCAAGGAGGCAAGGCCCGCGCCAAGGCCAAGTCGCGCTCGTCCCGCGCTGG	.	Long RNA	HIST2H2AA3	.	.	.	.	-109.4	0.387715	0.303474	0.310232	T10734	0.737
58	chr1	149822628	149822925	Y	+	10	221	10.8168	27.0919	22.1957	.	.	.	exon	sense	297	GACTTTCCCGATCGCCAGGCAGGAGTTTCTCTCGGTGACTACTATCGCTGTCATGTCTGGTCGTGGCAAGCAAGGAGGCAAGGCCCGCGCCAAGGCCAAGTCGCGCTCGTCCCGCGCTGGCCTTCAGTTCCCGGTAGGGCGAGTGCATCGCTTGCTGCGCAAAGGCAACTACGCGGAGCGAGTGGGGGCCGGCGCGCCCGTCTACATGGCTGCGGTCCTCGAGTATCTGACCGCCGAGATCCTGGAGCTGGCGGGCAACGCGGCTCGGGACAACAAGAAGACGCGCATCATCCCTCG	.	Long RNA	HIST2H2AA4	.	.	.	.	-121.5	0.707646	0.798586	0.803747	T36129,T10733	0.624
59	chr1	149822987	149823161	Y	+	10	221	10.8168	27.0919	22.1957	.	.	.	exon	sense	174	TCGCCCAGGGCGGCGTCTTGCCTAACATCCAGGCCGTACTGCTCCCTAAGAAGACGGAGAGTCACCACAAGGCAAAGGGCAAGTGAGGCTGACGTCCGGCCCAAGTGGGCCCAGCCCGGCCCGCGTCTCGAAGGGGCACCTGTGAACTCAAAAGGCTCTTTTCAGAGCCACCCA	.	Long RNA	HIST2H2AA4	.	.	.	.	-64.9	0.62323	0.621086	0.650299	T36129,T10733	0.081
60	chr1	149824410	149824685	Y	+	10	202	10.7275	25.1583	20.2936	.	.	ALL_AGO|slc1571_chr6|41|3|9|0.33|COORDS=chr6+:27886163;ALL_AGO|slc1570_chr6|47|5|11|0.45|COORDS=chr6+:27886141	exon	sense	275	GCTGCCCTTCCAGCGGCTGGTACGCGAGATCGCGCAGGACTTTAAGACGGACCTGCGCTTCCAGAGCTCGGCCGTGATGGCGCTGCAGGAGGCCAGCGAGGCCTACCTGGTGGGGCTGTTCGAAGACACGAACCTGTGCGCCATCCACGCCAAGCGCGTGACCATTATGCCCAAGGACATCCAGCTGGCCCGCCGCATCCGTGGAGAGCGGGCTTAAGAAGTGGCGGTTCGGCCGGAGGTTCCATCGTATCCAAAAGGCTCTTTTCAGAGCCACC	.	Long RNA	HIST2H3A	.	.	.	.	-116.6	0.859025	0.8746	0.873062	T15896	0.079
61	chr1	149832336	149832725	Y	-	8	174	8.87364	22.1838	17.4302	.	.	.	exon	sense	389	AGAAGCTGTCTATCGGGCTCCAGCGGTCATGTCCGGCAGAGGAAAGGGCGGAAAAGGCTTAGGCAAAGGGGGCGCTAAGCGCCACCGCAAGGTCTTGAGAGACAACATTCAGGGCATCACCAAGCCTGCCATTCGGCGTCTAGCTCGGCGTGGCGGCGTTAAGCGGATCTCTGGCCTCATTTACGAGGAGACCCGCGGTGTGCTGAAGGTGTTCCTGGAGAATGTGATTCGGGACGCAGTCACCTACACCGAGCACGCCAAGCGCAAGACCGTCACAGCCATGGATGTGGTGTACGCGCTCAAGCGCCAGGGGCGCACCCTGTACGGCTTCGGAGGCTAGGCCGCCGCTCCAGCTTTGCACGTTTCGATCCCAAAGGCCCTTTTTAGGG	.	Long RNA	HIST2H4B	.	.	.	.	-150.5	0.782231	0.717758	0.828365	T33719	0.445
62	chr1	149857734	149858220	Y	-	32	932	32.5634	98.742	93.2264	.	.	ALL_AGO|slc20265_chr1|48|3|9|0.33|COORDS=chr1-:148124676	exon	sense	486	GGCTAAGCCGCGTTTGTACTGTGTCTTACCATGCCTGAACCGGCAAAATCCGCTCCGGCCCCTAAAAAGGGCTCCAAGAAAGCCGTCACCAAAGCCCAGAAGAAAGACGGCAAGAAGCGCAAGCGCAGCCGCAAAGAGAGCTACTCCATCTACGTGTACAAGGTGCTGAAGCAGGTCCACCCCGACACCGGCATCTCGTCCAAGGCCATGGGCATCATGAACTCCTTCGTCAACGACATCTTCGAGCGCATCGCGGGAGAGGCTTCCCGCCTGGCGCACTACAACAAGCGCTCCACCATCACATCCCGCGAGATCCAGACGGCCGTGCGCCTGCTGCTGCCCGGCGAGCTGGCCAAGCACGCCGTGTCCGAGGGCACCAAGGCGGTCACCAAGTACACC…	.	RBP	HIST2H2BE	UCHL5	.	.	.	-167.2	0.870619	0.822862	0.820185	T10730	0.304
63	chr1	149858525	149858959	Y	+	26	725	26.6248	78.0215	72.5814	.	.	ALL_AGO|slc7740_chr1|47|2|5|0.40|COORDS=chr1+:148125520;ALL_AGO|slc1457_chr6|48|2|5|0.40|COORDS=chr6+:27208997	exon	sense	434	TGTCTGGTCGTGGCAAACAAGGAGGCAAGGCCCGCGCCAAGGCCAAGTCGCGCTCGTCCCGCGCTGGCCTCCAGTTCCCGGTAGGGCGAGTGCACCGCTTGCTGCGCAAAGGCAACTACGCGGAGCGGGTGGGGGCCGGCGCGCCCGTCTACATGGCGGCGGTCCTCGAGTACCTGACCGCCGAGATCCTGGAGCTGGCGGGCAACGCGGCTCGGGACAACAAGAAGACGCGCATCATCCCTCGTCACCTCCAGCTGGCCATCCGCAACGACGAGGAACTGAACAAGCTGCTGGGCAAAGTCACCATCGCCCAGGGCGGCGTTTTGCCTAACATCCAGGCCGTTCTGTTACCAAAGAAAACCGAAAGCCACAAAGCCAAAAGCAAATAAATGCAGACAA…	.	Long RNA	HIST2H2AC	.	piRNA	piR-45268	.	-169	0.568786	0.782562	0.907687	T6884	0.003
64	chr1	149859217	149859516	Y	+	87	2491	84.4261	255.14	249.132	.	.	.	exon	sense	299	ATGGCGAGGGATGATGCGCGTCTTCTTGTTGTCCCGAGCCGCGTTGCCCGCCAGCTCCAGAATTTCCGCGGTCAGGTACTCGAGGACCGCCGCCAGGTACACCGGGGCGCCTGCCCCGACCCGCTCCGCGTAGTTGCCTTTGCGCAGCAAGCGGTGCACTCGCCCCACCGGGAACTGGAGACCAGCGCGGGACGAGCGCGACTTGGCCTTAGCGCGGGCCTTGCCTCCCTGCTTTCCGCGTCCTGACATTACGGCTAAAATTGCAGTTACAGCTTCTTTTACAAGGAGAAGAATGTGGA	.	RBP	BOLA1	AARS	Long RNA	HIST2H2AB	.	-114.2	0.835137	0.835508	0.83687	No	0.621
65	chr1	150122027	150122462	Y	+	8	167	8.85014	21.5078	16.742	.	.	.	exon	sense	435	CCGCGATTCGCCCTTTATTCTGAACTCGCAACGTCAGCGGCCCGCGGATGGAGCTGCGGGGTGCGGACTGGGCCGCCCACAGCGCAccgggccgggggagcggccgcgctgggccgggcgggcgggtggcgggggtgcgctcggggacccgggccgcgtgggcgccgggATGGAGGGCGCCAAGGGGCGGGGAGCGGGCGTGCGTGTGTGTGCGAGTGCGAATGCGAGGGAGGCCGGCCTTGAGTGAAACCGGAGCTACAAAGAAGGGGAGAGTCCGGGAGCGGGAGGGCGCGAGGGAGGAGCGGCGGCGCCGGGGCAGCTCCGACGCCCTCCCGCGGGGAAGGAgcccccgcggtgccgccgaggccccgacgcggggccgcccctcggctcgccgcc…	.	RBP	PLEKHO1	NKRF	.	.	.	-245	0.612168	0.542126	0.613446	No	0.306
66	chr1	150595095	150595255	Y	-	5	83	5.86738	12.7408	8.31952	.	.	.	exon	sense	160	TGGCTCCTGCCCCTTCCTGCTTTTGCAGCCAGGGGTCAGGAGGTGGCTCGGGTGTGGGCTGGAGAGGCAGAAGCCCTTTCCTGTTGGTGTCCCAGCACATGGAGCCCCTTGGGCTGAGCACCAAGACCTTGAACCTTTTTTGTTTTACCTTTTTTCCAAA	.	RBP	ENSA	NKRF	.	.	.	-64.2	0.907088	0.938431	0.935075	No	0.002
67	chr1	153330760	153330909	Y	+	9	187	9.80507	23.5833	18.7707	.	.	.	exon	sense	149	TGACTTGCAAAATGTCGCAGCTGGAACGCAACATAGAGACCATCATCAACACCTTCCACCAATACTCTGTGAAGCTGGGGCACCCAGACACCCTGAACCAGGGGGAATTCAAAGAGCTGGTGCGAAAAGATCTGCAAAATTTTCTCAAG	.	Long RNA	S100A9	.	.	.	.	-34.1	0.113705	0.321879	0.37994	T10618	0.143
68	chr1	153333120	153333499	Y	+	29	770	29.3735	82.5633	77.0993	.	.	.	exon	sense	379	AGGAGAATAAGAATGAAAAGGTCATAGAACACATCATGGAGGACCTGGACACAAATGCAGACAAGCAGCTGAGCTTCGAGGAGTTCATCATGCTGATGGCGAGGCTAACCTGGGCCTCCCACGAGAAGATGCACGAGGGTGACGAGGGCCCTGGCCACCACCATAAGCCAGGCCTCGGGGAGGGCACCCCCTAAGACCACAGTGGCCAAGATCACAGTGGCCACGGCCACGGCCACAGTCATGGTGGCCACGGCCACAGCCACTAATCAGGAGGCCAGGCCACCCTGCCTCTACCCAACCAGGGCCCCGGGGCCTGTTATGTCAAACTGTCTTGGCTGTGGGGCTAGGGGCTGGGGCCAAATAAAGTCTCTTCCTCCAA	.	Long RNA	S100A9	.	.	.	.	-154.4	0.141697	0.168216	0.164029	T10618	0
69	chr1	153362507	153362717	Y	-	17	403	17.6021	45.4407	40.3204	.	.	.	exon	sense	210	AAAGGGTGCAGACGTCTGGTTCAAAGAGTTGGATATCAACACTGATGGTGCAGTTAACTTCCAGGAGTTCCTCATTCTGGTGATAAAGATGGGCGTGGCAGCCCACAAAAAAAGCCATGAAGAAAGCCACAAAGAGTAGCTGAGTTACTGGGCCCAGAGGCTGGGCCCCTGGACATGTACCTGCAGAATAATAAAGTCATCAATACCTCA	.	Long RNA	S100A8	.	.	.	.	-61.5	0.16519	0.312767	0.322267	T10616,T10617	0.012
70	chr1	153362872	153363034	Y	-	7	134	7.83998	18.1346	13.4949	.	.	.	exon	sense	162	GGTGGGGCAAGTCCGTGGGCATCATGTTGACCGAGCTGGAGAAAGCCTTGAACTCTATCATCGACGTCTACCACAAGTACTCCCTGATAAAGGGGAATTTCCATGCCGTCTACAGGGATGACCTGAAGAAATTGCTAGAGACCGAGTGTCCTCAGTATATCA	.	Long RNA	S100A8	.	.	.	.	-40	0.0427407	0.243981	0.255142	T10616,T10617	0.75
71	chr1	153516128	153516405	Y	-	6	92	6.74587	13.6847	9.22636	.	.	.	exon	sense	277	CTCCAGAAAAGGACAGATGAAGCTGCTTTCCAGAAGCTGATGAGCAACTTGGACAGCAACAGGGACAACGAGGTGGACTTCCAAGAGTACTGTGTCTTCCTGTCCTGCATCGCCATGATGTGTAACGAATTCTTTGAAGGCTTCCCAGATAAGCAGCCCAGGAAGAAATGAAAACTCCTCTGATGTGGTTGGGGGGTCTGCCAGCTGGGGCCCTCCCTGTCGCCAGTGGGCACTTTTTTTTTTCCACCCTGGCTCCTTCAGACACGTGCTTGATGCT	.	RBP	S100A4	SND1	.	.	.	-83.9	0.644419	0.588661	0.565152	No	0.484
72	chr1	153954378	153954495	Y	-	15	381	15.7883	43.2886	38.1835	.	.	.	exon	sense	117	CAGAGGGGCTTGGAGGGTCACATAGGTAGATGGTAAAGAGAATGAGGAGAAAAAGGAGAAAAGGGAAAAGCAGAAAGGAAAAAaaggaagagagaggaagggagaagggagaggaat	.	RBP	RAB13	DDX6	.	.	.	-2.2	0.239171	0.00537607	0.0122393	No	0.331
73	chr1	153968073	153968193	N	+	9	177	9.7523	22.5216	17.7198	.	.	.	pseudogene	sense	120	CCTCTTCCAGGGACGTTGTCTGCAGGCACTCAGAATGGTCCAGCGTTTGACATACCAACGTAGGCTTTCCTACAATACAGCCTCTAACAAAACTAGGCTGTCCCAAACCCTTGGTAATAG	.	Long RNA	RP11-422P24.9	.	Long RNA	NUP210L	.	-29.9	0	0	0	No	0.055
74	chr1	154129889	154130190	Y	-	5	94	5.91465	13.9072	9.42496	.	.	.	exon	sense	301	GAAATGCACCAAAGAGGAGCACCTCTGTACACAAAGGATGCTGGACCAGACCCTGCTTGACCTGAATGAGATGTAGAACGCCCCAGTCCCACCCTGCTGCTGCTCCTCCCTCTGACCCAGACTCCGCCTGAGGCCAGCCTGCGGGAAGCTGACCTTTAACTGAGGGCTGATCTTTAACTGGAAGGCTGCTTTCTCCTTTCACCACCCCCTCCTTCCCTGTGTCTTTTTCGCCAAACTGTCTCTGCCTCTTCCCGGAGAATCCAGCTGGGCTAGAGGCTGAGCACCTTTGGAAACAACATTT	.	RBP	TPM3	MTPAP	.	.	.	-81.9	0.755625	0.829249	0.834322	No	0.501
75	chr1	154155466	154155659	Y	-	8	166	8.84673	21.4185	16.6896	.	.	ALL_AGO|slc2377_chr16|37|1|9|0.11|COORDS=chr16+:51246689	exon	sense	193	GGAGGCTGCAACGCCGAGCGGAGGAGGCAGGAACCGGAGCGCGAGCAGTAGCTGGGTGGGCACCATGGCTGGGATCACCACCATCGAGGCGGTGAAGCGCAAGATCCAGGTTCTGCAGCAGCAGGCAGATGATGCAGAGGAGCGAGCTGAGCGCCTCCAGCGAGAAGTTGAGGGAGAAAGGCGGGCCCGGGAA	.	RBP	TPM3	GRWD1	.	.	.	-65	0.770964	0.85642	0.84472	No	0.282
76	chr1	155214573	155214646	Y	-	6	98	6.79521	14.3602	9.83407	.	.	.	.	sense	73	tctctcgctcgctctctcgctctctcgctctctctcgctcgctctctcgctctcgctctctctctctctcCGG	.	Repeats	(GA)n	.	.	.	.	-2.8	0.0323014	0.0132192	0.0134932	No	0.662
77	chr1	155288543	155288646	Y	+	16	394	16.7169	44.6697	39.4954	.	.	.	intron	sense	103	GGTGAGGGGAGGTGAGGGACAGCGCGAACCATGTCTGGACAGCGAGGGAGGGCTCAGGATGTGCATTGCCCTCCTGAGGAGTTTCTCTTCTCCCCTTACTCAG	Y	RBP	FDPS	RPS5	Long RNA	RUSC1-AS1	.	-49.3	0.199709	0.19501	0.220854	T24619	0.001
78	chr1	156260064	156260136	Y	-	18	432	18.58	48.3654	43.2183	.	.	.	.	sense	72	TTGGagaaagaagaaaagaagaaagaaggaagaagaagaagaaagaaaggaggaagaaggaagaagaagaGC	.	Repeats	(TTC)n	.	.	.	.	0	0.0802083	0.0415694	0.0508472	No	1
79	chr1	156440846	156440973	Y	-	29	815	29.5511	86.9841	81.5412	.	.	.	.	sense	127	caggaggttgaggcaggagaattgcttgaacctgggaggtggaggctgcaatgagtggagatcgcaccactgcactccagtctgggcaacagagcgagactctgtctcaaaaaagaaaagaaaagaa	.	Repeats	AluSx	.	.	.	.	-41.7	0.153165	0.112787	0.121543	No	0
80	chr1	159887896	159888657	Y	-	9	189	9.81367	23.7828	18.9902	.	.	.	exon	sense	761	TGGGCACCAACCGCGGGGCGTCTCAGGCAGGCATGACTGGCTACGGGATGCCACGCCAGATCCTCTGATCCCACCCCAGGCCTTGCCCCTGCCCTCCCACGAATGGTTAATATATATGTAGATATATATTTTAGCAGTGACATTCCCAGAGAGCCCCAGAGCTCTCAAGCTCCTTTCTGTCAGGGTGGGGGGTTCAGCCTGTCCTGTCACCTCTGAGGTGCCTGCTGGCATCCTCTCCCCCATGCTTACTAATACATTCCCTTCCCCATAGCCATCAAAACTGGACCAACTGGCCTCTTCCTTTCCCCTGGGACCAAAATTTAGGGGCCTCAGTCCCTCACCGCCATGCCCTGGCCTATTCTGTCTCTCCTTCTTCCCCCTGGCCTGTTCTGTCTCTGA…	.	RBP	TAGLN2	PCBP2	.	.	.	-273.4	0.484347	0.476297	0.444106	T10456,T10459	0.006
81	chr1	159889452	159889624	Y	-	9	182	9.77724	22.9925	18.2182	.	.	ALL_AGO|slc21679_chr1|47|6|9|0.67|COORDS=chr1-:158156202	exon	sense	172	TGCTATGTGAGCTCATTAATGCACTGTACCCCGAGGGGCAGGCCCCAGTAAAGAAGATCCAGGCCTCCACCATGGCCTTCAAGCAGATGGAGCAGATCTCTCAGTTCCTGCAAGCAGCTGAGCGCTATGGCATTAACACCACTGACATCTTCCAAACTGTGGACCTCTGGGA	.	RBP	TAGLN2	UCHL5	.	.	.	-47.7	0.98657	0.962163	0.961576	T10457	0.31
82	chr1	159890136	159890287	Y	-	6	118	6.89609	16.4617	11.8784	.	.	.	exon	sense	151	GGACCTGCATATGGCCTGAGCCGGGAGGTGCAGCAGAAGATTGAGAAACAATATGATGCAGATCTGGAGCAGATCCTGATCCAGTGGATCACCACCCAGTGCCGAAAGGATGTGGGCCGGCCCCAGCCTGGACGCGAGAACTTCCAGAACT	.	RBP	TAGLN2	DDX3X	.	.	.	-43.9	0.940947	0.863046	0.865364	T10457	0.298
83	chr1	161022152	161022229	Y	-	31	876	31.505	93.1481	87.6624	Y	Y	.	intron	sense	77	GTAAGTCTGGGGAGATGGGGGGAGCTCTGCTGAGGGTGCACAAGGCCCTGGCTCTACACACATCCCTGTCTTACAGA	Y	Long RNA	ARHGAP30	.	.	.	.	-29.7	0.819818	0.356831	0.259338	T21394	0.024
84	chr1	167475448	167475616	Y	-	35	1015	35.463	107.091	101.546	.	.	.	.	sense	168	tgagaGAAAAAGAAagggaaggggaggggaggggagggagaggagaaagaaaaaagaaaagaaaagaaaggaaaggaaaagaaaagaaaaaagaaaagaaaagaaaaggaaaagaaaagaaaagaaaagaaaaggaaaagaaaagaaaagaaaagaaaaaagaaAGAT	.	Repeats	(TTTTC)n	.	.	.	.	0	0.0932083	0.0758155	0.0797381	No	1
85	chr1	169669298	169669378	Y	-	7	142	7.87294	18.9489	14.2923	.	.	.	.	sense	80	gaacccgggaggcggaggttgcagtgagctgagaccgcaccattgcactccagcctggtgacagagtgagactctgtctc	.	Repeats	AluSx1	.	.	.	.	-32.9	0.027775	0.018	0.0210875	No	0.017
86	chr1	174345269	174345413	Y	+	25	492	23.9706	54.5209	49.2507	.	.	.	.	sense	144	tagagaaagagagaaggaaggagagagagaaagaaaaagaaagaaggaaagaaagtgaaggaaagaaaggaagaaagaaagagaaggaaggaaggaaaggaaagaaggaaggaaggaagggaaagaaggaaggaaggaaaaaat	.	Repeats	L1MD	.	.	.	.	0	0.00698611	0.00697917	0.00741667	No	1
87	chr1	181391993	181392122	N	+	22	578	22.617	63.1589	57.8235	.	.	.	intron	sense	129	TACAAGAACTGCTAACTCATGCCCCCATGCCTAGCAACATGGCTTTCTCAACTTTGAAAGGATTAGAGTCATCCGTTGGTCTTAGGAACCAAAAACATTGATGCAACTCCAAATAAAAGTAGCAAACAT	.	Long RNA	CACNA1E	.	.	.	.	-22	0	0	0	No	0.172
88	chr1	182305087	182305224	N	+	8	147	8.7466	19.4133	14.7016	.	.	.	pseudogene	sense	137	CCGCTGCCTTCCGCAGGCCGTTTCCACCGAGGAAAAGGAATCGTATTGTAAGTTCGCTATCCAGAACCTCCACTCTTTCGACCCCTTTGCTGATGCAAGTAAGGGTGATGACCTGCTTCCTGCTGGCACTGAGGATT	.	RBP	RP11-416K24.2	YBX3	.	.	.	-33.4	0	0	0	No	0.743
89	chr1	192127591	192127869	Y	+	6	120	6.90273	16.6652	12.0326	.	.	.	exon	sense	278	AGTTCTGCATTTCTGCAGAGACAGAAAGAAACGCAGCTCTTGACTTCTTTTTTGTAAACATTACTGTAAGAGTTGTGATAACTTTTTATTCTACTATGTATATGTATGGAATAGTATTAATAAATGAACTAGGGAAGGATGTAATAAATTAGACATCTCTTCATTTTAGAGAGAAGATGGAAACAACATTGCTTTTCTTTTCTCAAATAAATATGTGTGAATCAAAAGAAAAAACTTTTTTCAAGTTAATACATGGTTCAGGAAAAGAAGAAACAAGC	.	Long RNA	RGS18	.	.	.	.	-55.3	0.42668	0.409248	0.34923	T10286	0.052
90	chr1	192154504	192154667	Y	+	7	147	7.88884	19.4195	14.7016	.	.	.	exon	sense	163	GAATAAAAACCAGAGAAGGTTTTTCCCAGGACGTCTCATGTTTGGCCCTTTAGAATTGGGGTAGAAATCAGAAATGAGATGAGGGGAAGAAGCAAGGAGTCTAAGGCCCTAGCGATTTGGGCATCTGCCACATTGGTTCATATTCAGAAAGTGTTATCTCATT	.	Long RNA	RGS18	.	Long RNA	RP11-139E24.1	.	-47.4	0.0635092	0.00174233	0.00228834	No	0.009
91	chr1	192154827	192154983	Y	+	5	94	5.91663	13.9689	9.44617	.	.	.	exon	sense	156	GGAAATTTAATGTTAGTTGAAATGTAAAATGTGAAAACTTTAGATCATTTGTAGTAATAAATATTTTTAACTTCATTCATACAGTTAAGTTTATCTGACAATAAAAGCTCTGACTGAATGTTGATTATCCTTCCTATTATGTAATAAGGAATAAAC	.	Long RNA	RGS18	.	Long RNA	RP11-139E24.1	.	-19.8	0.0448269	0.0200064	0.039141	No	0.678
92	chr1	202440938	202441230	Y	-	9	199	9.85155	24.785	19.9709	.	.	.	pseudogene	sense	292	GATCTCCTTCATCCCTCTCCAGAAGAGGAGAAGAGGAAACACAAGAAGAAACGCCTGGTGCAGAGCCCCAATTCCTACTTCATGGATGTGAAATGCCCAGGATGCTATAAAATCACCACGGTCTTTAGCCATGCACAAACGGTAGTTTTGTGTGTTGGCTGCTCCACTGTCCTCTGCCAGCCTACGGGAGGAAAAGCAAGGCTTACAGAAGGATGTTCCTTCAGGAGGAAGCAGCACTAAAAGCACTCTGAGTCAAGATGAGTGGGAAACCATCTCAATAAACACATTTTGG	.	Long RNA	RP11-175B9.3	.	Long RNA	PPP1R12B	.	-78.6	0.600483	0.390764	0.760565	No	0.164
93	chr1	204525611	204525818	Y	+	10	221	10.8168	27.0919	22.1957	.	.	.	.	sense	207	ctctggagctcgagaccagcctgggcaacatggtgaaaccctgtctctaccaaaaatacaaaaaaaaagctgggcatggtgggtgcatgcttgtcccagctactgaggaggctgaggtgggaggatcgcttgagcctgggaggtggaggttgcagtgagctgagatggcaccactgcaatccaaggtgggtgacagagacgctgtct	.	Repeats	AluJb	.	.	.	.	-75.4	0.133831	0.0670773	0.0894203	No	0.016
94	chr1	206869477	206869606	Y	-	11	254	11.8149	30.3479	25.4344	.	.	.	pseudogene	sense	129	TTGAAAGGGGAAGGAAAAGAAGGAAGAACAGGTCATCAGCCTCAGACCTCAGGTGGCTGAAGGAGAGAATGTATTTGGTGTCTGCCATATCTTTGCATCCTTCAATGACACTTTTGTCCATGTCACTGA	.	Long RNA	RP11-343H5.4	.	RBP	MAPKAPK2	PTBP1	-29.6	0.089	0.148023	0.99962	No	0.43
95	chr1	224052327	224052577	Y	-	15	298	15.308	34.856	29.8623	.	.	.	pseudogene	sense	250	GTCCACACCCGCCGCCAGCTCACCATGGATGATGATATCGCGGCGCTCGTCATTGACAACAGCTCCGGCATGTGCAAGGCTGGCTTCACAGGGGATGATGACCCCTGGGCCATCTTCCCTTCCATGGTGGGGCGCCCCAGGCACCAGGGCGTGATGGTGAGCATGGGTCAGAAGGATTCCTATGTGGGTGACGAGGCCCAGAGCAAGAGAGGCATCCTGACCCTGAAGTACCCCATCGAGCACGGCATCG	.	Long RNA	RP11-332L18.4	.	.	.	.	-92.6	0.3555	0.271816	0.937472	No	0.468
96	chr1	226250410	226250501	Y	+	12	288	12.8194	33.8638	28.8454	.	.	.	exon	sense	91	AGCCATCTTTCAATTGTGTTCGCAGCCGCCGCCGCGCCGCCGTCGCTCTCCAACGCCAGCGCCGCCTCTCGCTCGCCGAGCTCCAGCCGAA	.	RBP	H3F3A	FXR2,GEMIN5	.	.	.	-18.3	0.86178	0.983582	0.96556	T10128,T10127,T10131	0.966
97	chr1	226259339	226259701	Y	+	11	259	11.8333	30.8987	25.9257	.	.	.	.	sense	362	AGGTATTGGCAGTTTTTCCATTTTCATTTGTGTGTGAATTTTTAATATAAATGCGGAGACGTAAAGCATTAATGCAAGTTAAAATGTTTCAGTGAACAAGTTTCAGCGGTTCAACtttataataattataaataaaCCTGTTAAATTTTTCTGGACAATGCCAGCATTTGGATTTTTTTAAAACAAGTAAATTTCTTATTGATGGCAACTAAATGGTGTTTGTAGCATTTTTATCATACAGTAGATTCCATCCATTCACTATACTTTTCTAACTGAGTTGTCCTACATGCAAGTACATGTTTTTAATGTTGTCTGTCTTCTGTGCTGTTCCTGTAAGTTTGCTATTAAAATACATTAAACTA	.	Repeats	AT_rich	.	.	.	.	-60.3	0.95405	0.994605	0.99247	T10126,T10129,T10130	0.864
98	chr1	229406892	229407094	Y	+	7	147	7.88884	19.4195	14.7016	.	.	.	exon	sense	202	GGAGGGCCCTGCGCCTGCGCGGAGCTGGAGTCCGGCTGGGCCGCAGCCGCTGGGAGACCGGCGGTTGCCGTGGGGACCGGTCGGGCCCCTCCCTCCTCCGGTCCCCCGCCCCAGGTCCTTCCCCACCGAGACGCGCCGGCGGACCGCGGGCGAGTGCAGCCGGTGACCCGGCGAGAGGCGGCGCCGCTCCCAAGATGTCGCA	.	RBP	RAB4A	NCBP2	.	.	.	-113.6	0.606287	0.446718	0.456183	No	0.466
99	chr1	244474461	244474528	Y	-	18	465	18.7179	51.708	46.5198	.	.	.	intergenic	sense	67	tggaagaggaggaggaagagggaagagggaaaaaggaagaaggaagaaagagaagagaaaagaaaaC	.	Repeats	polypyrimidine	.	.	.	.	0	0.0103433	0.00338806	0.0041791	No	1
100	chr1	245027205	245027361	Y	-	9	204	9.8677	25.2916	20.4614	.	.	.	exon	sense	156	TgaagaggaggaggaagaggaagaggaggaggaagGAATCTCCGCTCTGGACGGCGACCAGATGGAGCTAGGAGAGGAGAACGGGGCCGCGGGGGCGGCCGACTCGGGCCCGATGGAGGAGGAGGAGGCCGCCTCGGAAGACGAGAACGGCGACGA	.	RBP	HNRNPU	EIF4G2	.	.	.	-51	0.93459	0.950808	0.87991	No	0.005
101	chr10	6446540	6446726	Y	-	10	208	10.7569	25.7144	20.875	.	.	.	Intergenic	sense	186	ggaaggaaggaagggaagggaggaaggaaggagggaggaaggagagagagagaaagaaagaaaaaaggaaagaaaggaaggaagaaaggaaagagagaaagaaaaagagaaaaaaggaaagaaaggaaggaagaaaggaaagagagaaagaaagagagaaagagagagagaaaaaaagaaagaaag	.	Repeats	T-rich	.	.	.	.	0	0.0999301	0.0998656	0.100823	No	1
102	chr10	6547480	6547561	Y	-	19	506	19.7354	55.8448	50.614	.	.	.	.	sense	81	tgagagagaggaaggaaggaaggaaggggaagggaaggagaaagaaagaaagaagaaaagaaagaaaaagaaagaaagaaa	.	Repeats	CT-rich	.	.	.	.	0	0.0486296	0.0484568	0.051716	No	1
103	chr10	12410527	12410628	Y	+	11	257	11.8275	30.719	25.7583	.	.	.	.	sense	101	ttacatcatctttctgagtttctcttctctcacatttaagtgggggtaacagtacctacctttccagcttgttgtgaggttttgttgcaataaCAAGAATA	.	Repeats	MIRb	.	.	.	.	-21.8	0.123188	0.0555842	0.0648317	No	0.052
104	chr10	12492123	12492191	Y	+	42	1232	42.284	128.953	123.279	.	.	.	.	sense	68	tggggagagagagaaagaaggaaggagggaaggaaaaagggaaagaaggaaggaaggaagaaggaagT	.	Repeats	GA-rich	.	.	.	.	0	0.235162	0.00795588	0.00941176	No	1
105	chr10	12793051	12793126	Y	-	26	637	26.2101	69.1139	63.7748	.	.	.	.	sense	75	tcttatcttatcttatcttatcttatcttatcttatcttatcttatcttatcttatcttatcttatcttatctta	.	Repeats	(ATAAG)n	.	.	.	.	0	0.05796	0.0352667	0.0360267	No	1
106	chr10	13179222	13179335	Y	+	58	1787	58.0147	184.578	178.724	.	.	.	.	sense	113	gagccgagacgacaccactgcactccagcctgggtgacagagggagactctgtctcgaaagaaagaaagaaaaaaaggaaggaaggagaaggaaggaaggagaagaaaagGTA	.	Repeats	polypurine	.	.	.	.	-21.9	0.0312301	0.030177	0.0313894	No	0.008
107	chr10	17271565	17271736	Y	+	5	92	5.90851	13.7236	9.23874	.	.	.	exon	sense	171	AGCCGCAGCCTCTACGCCTCGTCCCCGGGCGGCGTGTATGCCACGCGCTCCTCTGCCGTGCGCCTGCGGAGCAGCGTGCCCGGGGTGCGGCTCCTGCAGGACTCGGTGGACTTCTCGCTGGCCGACGCCATCAACACCGAGTTCAAGAACACCCGCACCAACGAGAAGGTG	.	RBP	VIM	FMR1	Long RNA	RP11-124N14.4	.	-71.1	0.952871	0.81862	0.895216	No	0.349
108	chr10	17275583	17275926	Y	+	6	112	6.87297	15.8422	11.269	.	.	.	exon	sense	343	AGGATGTTGACAATGCGTCTCTGGCACGTCTTGACCTTGAACGCAAAGTGGAATCTTTGCAAGAAGAGATTGCCTTTTTGAAGAAACTCCACGAAGAGGTTAGTGGAGTGACTTTCGGGGAATGAATGAGGGTAAGGCAGCCCCCACGGTTGGCAGAGCTGACCGTCTGTCTGTTCTTTTTGCAGGAAATCCAGGAGCTGCAGGCTCAGATTCAGGAACAGCATGTCCAAATCGATGTGGATGTTTCCAAGCCTGACCTCACGGCTGCCCTGCGTGACGTACGTCAGCAATATGAAAGTGTGGCTGCCAAGAACCTGCAGGAGGCAGAAGAATGGTACAAATC	.	RBP	VIM	FASTKD2	Long RNA	RP11-124N14.3	.	-109	0.672589	0.6987	0.72558	No	0.104
109	chr10	18861985	18862074	N	-	6	67	6.4196	11.0432	6.79396	.	.	.	intron	sense	89	gagtggaacggaatggacgatggaatggaatggagtgtaacggaggatggaatggaatggagtggaacggagaatggaatggaatggag	.	RBP	NSUN6	TARDBP	.	.	.	-0.6	0	0	0	No	0.825
110	chr10	20222796	20222858	Y	+	12	255	12.678	30.5419	25.5827	.	.	.	.	sense	62	gtgggagggagggaaaaaaggaaggaaagagaaagaaaggaaagagaaaggaaggaaggaca	.	Repeats	HAL1-3A_ME	.	.	.	.	0	0.00820968	0.00837097	0.00925806	No	1
111	chr10	23003121	23003467	Y	-	8	165	8.84054	21.2613	16.5346	.	.	.	exon	sense	346	cgggccggggcgcgagccgagcgcagtctgccgggccgagcgggcggagcgagccgagtggggctgagcgcgccggcggcggcgggcggagcggagcgcggcgcgccggggcCGCCGCCGGGGGGATGCGGCTGCCTCCCCGGGCCGGGGTGTAGAGAGGGCGGGTCCCCGGCCTCGGGAGCACGGCGGTGGAGGGGACATAGGAGGCGGCCATGGCGACCCCCGGCAACCTAGGGTCCTCTGTCCTGGCGAGCAAGACCAAGACCAAGAAGAAGCACTTCGTAGCGCAGAAAGTGAAGCTGTTTCGGGCCAGCGACCCGCTGCTCAGCGTCCTCATGTGGGGGGT	.	RBP	PIP4K2A	ZNF622	.	.	.	-175.1	0.700153	0.763697	0.683783	T12471	0.877
112	chr10	25861356	25861433	Y	+	13	306	13.7669	35.7451	30.6976	.	.	.	.	sense	77	gatgcagtacactatgattgtgcttgtgaatagccactgcactccagcatgggcaacatagcgagaccctgtctcta	.	Repeats	FAM	.	.	.	.	-19	0.0691688	0.0585195	0.0646623	No	0.174
113	chr10	26750078	26750151	Y	+	11	214	11.6069	26.3368	21.4554	.	.	.	.	sense	73	CgaaggaagagagggaaagaaagaaggaaagaaggaaggaagggaaggagggagggaaggaaggaaggaaAAA	.	Repeats	(GGAA)n	.	.	.	.	0	0.00886301	0.0050137	0.00560274	No	1
114	chr10	52144126	52144246	Y	-	34	921	34.2264	97.6281	92.1144	.	.	.	.	sense	120	TGGAGGgaaggagggaaggaaggaaggaaggagagaaagagaggaaagagggaggaagagggaaaggagaaagaaggaaggaaaggagagagagagagagaaaaagaaagagagaaagaa	.	Repeats	T-rich	.	.	.	.	0	0.00989167	0.0083	0.00911667	No	1
115	chr10	70091822	70091937	Y	+	7	141	7.86679	18.7823	14.1002	.	.	.	exon	sense	115	TAGCTGTGCTGCGCAGCTCCCTAAGCGGTTGTCACCGCTGGAGACGGTTGGGAGAACCGTTGTGGCGAGCGCTACACGAGGCAAACGACTTCTCCCTTCTTTGAACTGGACCCCG	.	RBP	HNRNPH3	DDX3X	Long RNA	PBLD	.	-38.3	0.36333	0.36993	0.374052	T22295	0.44
116	chr10	71355031	71355102	N	-	58	1808	58.0901	186.65	180.88	.	.	.	Intergenic	unannotated	71	CAGTAAGGTCAGCTAAATAAGCTATGGGGTCCATACCCCAAAAATGCTGATTTATACCCTTTCTGTACTAA	.	Unannotated	.	.	Unannotated	.	.	-18.1	0	0	0	No	0.004
117	chr10	75757871	75758112	Y	+	6	103	6.82661	14.8784	10.3278	.	.	.	exon	sense	241	GTAGTCGCTGCACAGTCTGTCTCTTCGCCGGTTCCCGGCCCCGTGGATCCTACTTCTCTGTCGCCCGCGGTTCGCCGCCCCGCTCGCCGCCGCGATGCCAGTGTTTCATACGCGCACGATCGAGAGCATCCTGGAGCCGGTGGCACAGCAGATCTCCCACCTGGTGATAATGCACGAGGAGGGCGAGGTGGACGGCAAAGCCATTCCTGACCTCACCGCGCCCGTGGCCGCCGTGCAGGCG	.	RBP	VCL	EIF3D	.	.	.	-92.9	0.812585	0.801809	0.776635	No	0.828
118	chr10	76781824	76781924	Y	+	9	165	9.67244	21.2756	16.5228	.	.	.	.	sense	100	gaagaagaagaggaggaggaggacgaggaggaggaagaagaggaggaagaagaggaagaggatgaagaggaggaagaagaggaagaagaagaagaagaag	.	Repeats	GA-rich	.	.	.	.	0	0.13889	0.51248	0.75271	No	1
119	chr10	76788630	76788713	Y	+	52	1483	51.6833	154.118	148.337	.	.	.	.	sense	83	CTgaggaagaggaagaggaggaggaggaggaagaggaagaagaggaagaagaggaaggggaagaagaagaaggaggaggaaat	.	Repeats	GA-rich	.	.	.	.	0	0.0132651	0.129373	0.552361	No	1
120	chr10	79795132	79795448	Y	+	12	239	12.5742	28.9211	23.9883	.	.	.	exon	sense	316	TAGAAAGTTCATGACCAACCGACTACTTCAGAGGAAACAAATGGTAAGGAAGGGCACATCAATCTTTGCTTAATTGTCCTTTACTCTAAAGATGTATTTTATCATACTGAATGCTAAACTTGATATCTCCTTTTAGGTCATTGATGTCCTTCACCCCGGGAAGGCGACAGTGCCTAAGACAGAAATTCGGGAAAAACTAGCCAAAATGTACAAGACCACACCGGATGTCATCTTTGTATTTGGATTCAGAACTCATTTTGGTGGTGGCAAGACAACTGGCTTTGGCATGATTTATGATTCCCTGGATTATGCAAAG	.	RBP	RPS24	TBRG4	.	.	.	-72.2	0.516712	0.704516	0.725389	No	0.336
121	chr10	86320300	86320444	Y	+	7	141	7.86679	18.7823	14.1002	.	.	.	pseudogene	sense	144	GCACCTGCTATGTTCAATATAAGAAATATTGGAAAGACGCTCGTCACCAGGACCCAAGGAACCAAAATTGCATCTGATGGTCGTGTGTTTGAAGTGAGTCTTGCTGATTTGCAGAATGATGAAGTTGCATTTAGAAAATTCAAG	.	Long RNA	RPS3AP5	.	.	.	.	-27.8	0.878653	0.918354	0.999896	No	0.64
122	chr10	92933895	92933968	Y	+	45	1371	45.3608	142.895	137.16	.	.	.	intron	sense	73	CTTGGGCCACTGTAGGTTGGATATGAAGTGGCATGAAGGATTCAGTGAAAAAGCTTCATTGCATTAAAAAAAA	.	Long RNA	PCGF5	.	.	.	.	-16	0.0179041	0.0409315	0.0506849	No	0.016
123	chr10	101817588	101817660	N	-	22	590	22.6586	64.3232	59.0158	.	.	.	intron	sense	72	TTCACTGTAAAGCTAACCCAGCATTAACCTTTTAAGTTAAAGACTAAGAGAATCATTATCTCTTTACAGTGA	.	Long RNA	CPN1	.	.	.	.	-15.8	0	0	0	No	0.003
124	chr10	103578086	103578201	Y	-	5	83	5.86738	12.7408	8.31952	.	.	.	exon	sense	115	GCGGATAAACAGGAAGCGGGCGGTGGAGGCAGCAGCAGAGGGAGAGCTCGGGGCTTGGAGGGGAAACAGCGGAAGACCTAAGATTATCGGGAGGGCAGCAGAGGCAGAGAACGAG	.	RBP	MGEA5	NCBP2	.	.	.	-16.6	0.279974	0.291391	0.291313	No	0.943
125	chr10	109045349	109045414	Y	-	22	405	20.9482	45.6606	40.5354	.	.	.	intergenic	sense	65	TGGggaatggaatggaatggaatggaatggaatggaatggaatggaatggaatggaatggaatgg	.	Repeats	(CATTC)n	.	.	.	.	0	0.00975385	0.00212308	0.00223077	No	1
126	chr10	122114534	122114736	Y	-	9	195	9.83659	24.3618	19.5579	.	.	.	pseudogene	sense	202	CCCTTTCGGCCGGAACCGCCATCTTCCAGTAATTCGCCAAAATGACGAACACAAAGGGAAAGAGGAGAGGCACCCGATATATGTTCTCTAGGCCTTTTAGAAAACATGGAGTTGTTCCTTTGGCCACATATATGCGAATCTATAAGAAAGGTGATATTGTAGACATCAAGGGAATGGGTACTGTTCAAAAAGGAATGCCCCA	.	Long RNA	RP11-572P18.1	.	.	.	.	-42.3	0.920149	0.992005	0.996446	T25205	0.735
127	chr10	130262705	130262862	Y	+	12	61	6.58685	10.3369	6.14089	.	.	.	Intergenic	sense	157	tccttccctctagacttctcctcctcctccctcctcctccaccatcctcccctctagacttctcctcctcctccaccatcctcccctctagacttctcctcctcctccaccatcctcccctctagacttctcctcctcctccccatcctcccctcta	.	Repeats	CT-rich	.	.	.	.	-5.85	0.0330382	0.0095414	0.0151911	No	0
128	chr11	309010	309391	Y	+	5	80	5.85138	12.4379	8.01899	.	.	.	exon	sense	381	AGTCTAGGGACAGGAAGATGGTTGGCGACGTGACCGGGGCCCAGGCCTATGCCTCCACCGCCAAGTGCCTGAACATCTGGGCCCTGATTTTGGGCATCTTCATGACCATTCTGCTCATCATCATCCCAGTGTTGGTCGTCCAGGCCCAGCGATAGATCAGGAGGCATCATTGAGGCCAGGAGCTCTGCCCGTGACCTGTATCCCACGTACTCTATCTTCCATTCCTCGCCCTGCCCCCAGAGGCCAGGAGCTCTGCCCTTGACCTGTATTCCACTTACTCCACCTTCCATTCCTCGCCCTGTCCCCACAGCCGAGTCCTGCATCAGCCCTTTATCCTCACACGCTTTTCTACAATGGCATTCAATAAAGTGTATATGTTTC	.	RBP	IFITM2	DDX6	.	.	.	-111.1	0.184864	0.171197	0.20406	No	0.09
129	chr11	810001	810359	Y	+	16	408	16.7638	46.0249	40.8329	.	.	.	exon	sense	358	TGAGACTTCTCCGCCGCCTCCGCCGCAGACGCCGCCGCGTGAGTGTGGTGACCGGGCCCGGGGTGCCGGCTGGGGACGCGGAGTCCGTGGGGATGCGGGGTGGGCGGCGGGGTATTTTTGGGACGGAGGCCTACGGGCCGAGCCACGCGCGGCCTCGCCCGGCGGCCCCGGGATGGGCCGGCAGGAGGCCGCCGGGGTAACTCCGCCGTCGCGTCCTCTCCGCCCGCCTCAGGATGCGCTACGTCGCCTCCTACCTGCTGGCTGCCCTAGGGGGCAACTCCTCCCCCAGCGCCAAGGACATCAAGAAGATCTTGGACAGCGTGGGTATCGAGGCGGACGACGACCGGCTCAACAAGGT	.	RBP	RPLP2	XRCC6	.	.	.	-178	0.116461	0.377151	0.342994	T6104,T28889,T28723	0.754
130	chr11	812555	812867	Y	+	34	859	33.8535	91.4871	85.974	.	.	ALL_AGO|slc4752_chr11|43|4|5|0.80|COORDS=chr11+:107284707;ALL_AGO|slc95_chr11|42|20|32|0.62|COORDS=chr11+:802801;ALL_AGO|slc96_chr11|53|2|6|0.33|COORDS=chr11+:802853	exon	sense	312	TACCTGCTGGTGGGGCTGTAGCCGTCTCTGCTGCCCCAGGCTCTGCAGCCCCTGCTGCTGGTTCTGCCCCTGCTGCAGGTAAGTGGTGGCCTGGTGAGTGGGCAAGGGGCTGGGGCTCAGACGGTGTTGCTGCAGTGGGGTCTTCATGGGGGGACTGGCCTGGCACTTGGGCAGTGCTCACCATGCCTCTCCTCTGTTCCACAGCAGAGGAGAAGAAAGATGAGAAGAAGGAGGAGTCTGAAGAGTCAGATGATGACATGGGATTTGGCCTTTTTGATTAAATTCCTGCTCCCCTGCAAATAAAGCCTTTTT	.	RBP	RPLP2	PUM2	.	.	.	-133.7	0.410474	0.500196	0.568452	T6104,T28889,T28723,T28117,T28289,T28679	0.002
131	chr11	5246693	5246957	Y	-	216	7378	210.652	744.386	737.866	.	.	.	exon	sense	264	GCTCCTGGGCAACGTGCTGGTCTGTGTGCTGGCCCATCACTTTGGCAAAGAATTCACCCCACCAGTGCAGGCTGCCTATCAGAAAGTGGTGGCTGGTGTGGCTAATGCCCTGGCCCACAAGTATCACTAAGCTCGCTTTCTTGCTGTCCAATTTCTATTAAAGGTTCCTTTGTTCCCTAAGTCCAACTACTAAACTGGGGGATATTATGAAGGGCCTTGAGCATCTGGATTCTGCCTAATAAAAAACATTTATTTTCATTGCAA	.	Long RNA	HBB	.	.	.	.	-69.4	0.394826	0.375996	0.391905	T7251,T39431,T38319,T22930	0.283
132	chr11	5246719	5246948	Y	+	9	141	9.44051	18.8552	14.1654	.	.	.	exon	antisense	229	TAGGCAGAATCCAGATGCTCAAGGCCCTTCATAATATCCCCCAGTTTAGTAGTTGGACTTAGGGAACAAAGGAACCTTTAATAGAAATTGGACAGCAAGAAAGCGAGCTTAGTGATACTTGTGGGCCAGGGCATTAGCCACACCAGCCACCACTTTCTGATAGGCAGCCTGCACTGGTGGGGTGAATTCTTTGCCAAAGTGATGGGCCAGCACACAGACCAGCACGTTG	.	Antisense	.	.	Long RNA	HBB	.	-58.9	0.400856	0.372721	0.392109	No	0.624
133	chr11	5247806	5248342	Y	-	241	8650	236.651	871.678	865.013	.	.	.	exon	sense	536	AGGGCTGGGCATAAAAGTCAGGGCAGAGCCATCTATTGCTTACATTTGCTTCTGACACAACTGTGTTCACTAGCAACCTCAAACAGACACCATGGTGCATCTGACTCCTGAGGAGAAGTCTGCCGTTACTGCCCTGTGGGGCAAGGTGAACGTGGATGAAGTTGGTGGTGAGGCCCTGGGCAGGTTGGTATCAAGGTTACAAGACAGGTTTAAGGAGACCAATAGAAACTGGGCATGTGGAGACAGAGAAGACTCTTGGGTTTCTGATAGGCACTGACTCTCTCTGCCTATTGGTCTATTTTCCCACCCTTAGGCTGCTGGTGGTCTACCCTTGGACCCAGAGGTTCTTTGAGTCCTTTGGGGATCTGTCCACTCCTGATGCTGTTATGGGCAACCCTA…	.	Long RNA	HBB	.	.	.	.	-183.9	0.457539	0.492045	0.512388	T7251,T39431,T38319,T22930,T24133,T13199	0.143
134	chr11	5247852	5248301	Y	+	361	13639	354.215	1370.92	1363.97	.	.	.	exon	antisense	449	CTCAGTGTGGCAAAGGTGCCCTTGAGGTTGTCCAGGTGAGCCAGGCCATCACTAAAGGCACCGAGCACTTTCTTGCCATGAGCCTTCACCTTAGGGTTGCCCATAACAGCATCAGGAGTGGACAGATCCCCAAAGGACTCAAAGAACCTCTGGGTCCAAGGGTAGACCACCAGCAGCCTAAGGGTGGGAAAATAGACCAATAGGCAGAGAGAGTCAGTGCCTATCAGAAACCCAAGAGTCTTCTCTGTCTCCACATGCCCAGTTTCTATTGGTCTCCTTAAACCTGTCTTGTAACCTTGATACCAACCTGCCCAGGGCCTCACCACCAACTTCATCCACGTTCACCTTGCCCCACAGGGCAGTAACGGCAGACTTCTCCTCAGGAGTCAGATGCACCAT…	.	Antisense	.	.	Long RNA	HBB	.	-137.9	0.424443	0.456073	0.480472	No	0.066
135	chr11	5255251	5255417	Y	+	18	342	17.7948	39.3281	34.2294	.	.	.	exon	antisense	166	TCACAGTGCAGCTCACTCAGCTGAGAAAAAGTGCCCTTGAGGTTGTCCAGGTGAGCCAGGCCATCACTAAAGGCACCTAGCACCTTCTTGCCATGAGCCTTCACCTTAGGGTTGCCCATAACAGCATCAGGAGAGGACAGATCCCCAAAGGACTCAAAGAACCTCT	.	Antisense	.	.	RBP	HBD	SND1	-40	0.744349	0.42991	0.543271	No	0.433
136	chr11	5270715	5271034	Y	+	154	3980	135.498	404.23	398.042	.	.	.	exon	antisense	319	TTGCCATGTGCCTTGACTTTGGGGTTGCCCATGATGGCAGAGGCAGAGGACAGGTTGCCAAAGCTGTCAAAGAACCTCTGGGTCCATGGGTAGACAACCAGGAGCCTGTGAGATTGACAAGAACAGTTTGACAGTCAGAAGGTGCCACAAATCCTGAGAAGCGACCTGGACTTTTGCCAGGCACAGGGTCCTTCCTTCCCTCCCTTGTCCTGGTCACCAGAGCCTACCTTCCCAGGGTTTCTCCTCCAGCATCTTCCACATTCACCTTGCCCCACAGGCTTGTGATAGTAGCCTTGTCCTCCTCTGTGAAATGACCCAT	.	Antisense	.	.	Long RNA	HBG1	.	-106.5	0.361028	0.29831	0.403815	No	0.017
137	chr11	5275567	5275689	Y	+	188	4410	144.851	447.363	441.076	.	.	.	exon	antisense	122	CTCAGCTGGGCAAAGGTGCCCTTGAGATCATCCAGGTGCTTTATGGCATCTCCCAAGGAAGTCAGCACCTTCTTGCCATGTGCCTTGACTTTGGGGTTGCCCATGATGGCAGAGGCAGAGGA	.	Antisense	.	.	RBP	HBG2	SND1	-42.8	0.419197	0.322516	0.361869	No	0.043
138	chr11	5289701	5289772	Y	+	149	4112	137.221	417.434	411.208	.	.	.	exon	antisense	71	GTGGTACTTATGGGCCAGGGCAATGGCGACAGCAGACACCAGCTTCTGCCAGGCAGCCTGCACTTCAGGGG	.	Antisense	.	.	RBP	HBE1	SF3B4	-18.6	0.554254	0.804662	0.850521	No	0.894
139	chr11	8706354	8706427	Y	+	9	165	9.67244	21.2756	16.5228	.	.	.	exon	sense	73	GTGGACTTTGGTCAGTGAACAGACACGGGTGAATGCTGCTAAAAACAAGACTGGGGCTGCTCCCATCATTGAT	.	RBP	RPL27A	DDX55	.	.	.	-14	0.991438	0.936808	0.901452	T29218,T5613,T28627,T27874	0.782
140	chr11	8707232	8707383	Y	+	8	132	8.63449	17.9363	13.2803	.	.	ALL_AGO|slc458_chr11|56|20|46|0.43|COORDS=chr11+:8663936	exon	sense	151	CAAAGTTCTGGGAAAGGGAAAGCTCCCAAAGCAGCCTGTCATCGTGAAGGCCAAATTCTTCAGCAGAAGAGCTGAGGAGAAGATTAAGAGTGTTGGGGGGGCCTGTGTCCTGGTGGCTTGAAGCCACATGGAGGGAGTTTCATTAAATGCT	.	RBP	RPL27A	LARP4	.	.	.	-46.6	0.946543	0.873046	0.885695	T29218,T5613,T28627,T27874	0.007
141	chr11	9628036	9628175	Y	+	15	317	15.4759	36.8584	31.7893	.	.	.	pseudogene	sense	139	GACATTGATGTGGCCAAGGTCAACACCCTGATTCGGCCTGATGGAGAGAAGAAGGCATATGTTCGACTGGCTCCTGATTACGATGCTTTGGATGTTGTCAACAAAATTGGGATCATCTAAACTGAGTCCAGATGCCTAA	.	Long RNA	RP11-16F15.1	.	.	.	.	-32.9	0.645187	0.985036	0.963741	No	0.425
142	chr11	9681942	9682093	Y	+	11	214	11.6069	26.3368	21.4554	.	.	.	pseudogene	sense	151	TTCCTTTCGGCCGGAACCGCCATCTTCCAGTAATTCGCCAAAATGACGAACACAAAGGGAAAGAGGAGAGGCACCCGATATATGTTCTCTAGGCCTTTTAGAAAACATGGAGTTGTTCCTTTGGCCACATATATGCGAATCTATAAGAAAG	.	Long RNA	RP11-16F15.2	.	.	.	.	-28.9	0.826821	0.848715	0.969079	No	0.743
143	chr11	10830306	10830470	Y	-	9	199	9.85155	24.785	19.9709	.	.	.	exon	sense	164	AGCAGTGAGTCGGAGCTCTATGGAGGTGGCAGCGGGTACCGAGTGGCGGCTGCAGCAGCGACTCCTCTGAGCTGAGTTTGAGGCCGTCCCCGACTccttcctcccccttccctcccccttttttttgttttccgttcccctttcccctcccttccctatcccCG	.	RBP	EIF4G2	FXR2	.	.	.	-40.7	0.85153	0.914067	0.92225	No	0.778
144	chr11	16996204	16996589	Y	-	11	259	11.8337	30.9139	25.9893	.	.	.	pseudogene	sense	385	CTTTCCGCGCCGATAGCGCTCACGCAAGCATGGTTAACGTCCCTAAAACCCGCCGGACTTTCTGTAAGAAGTGTGGCAAGCACCAACCCCATAAAGTGACACAGTACAAGAAGGGCAAGGATTCTCTGTACGCCCAGGGAAAGCGGCGTTATGACAGGAAGCAGAGTGGCTATGGTGGGCAAACTAAGCCGATTTTCCGGAAAAAGGCTAAAACTACAAAGAAGATTGTGCTAAGGCTTGAGTGCGTTGAGCCCAACTGCAGATCTAAGAGAATGCTGGCTATTAAAAGATGCAAGCATTTTGAACTGGGAGGAGATAAGAAGAGAAAGGGCCAAGTGATCCAGTTCTAAGTGTCATCTTTTATTATGAAGACAATAAAATCTTG	.	Long RNA	RP11-466H18.1	.	.	.	.	-94.77	0.804304	0.826296	0.851597	No	0.538
145	chr11	17096999	17097133	Y	-	6	106	6.84528	15.2319	10.6874	.	.	ALL_AGO|slc7012_chr11|42|108|148|0.73|COORDS=chr11-:17053701	exon	sense	134	ACGTTTTGTGACAGGCAATAAAATTTTAAGAATTCTTAAGTCTAAGGGACTTGCTCCTGATCTTCCTGAAGATCTCTACCATTTAATTAAGAAAGCAGTTGCTGTTCGAAAGCATCTTGAGAGGAACAGAAAGG	.	RBP	RPS13	DDX6	.	.	.	-21.8	0.976828	0.977821	0.976507	T28021	0.769
146	chr11	27603426	27603509	Y	+	10	221	10.8168	27.0919	22.1957	.	.	.	pseudogene	sense	83	AACCCCAGCTGTGGTCTCTGAGAGACTGAAGATTCGAGGCTCCCTGGCCAGGGCAGCCCTTCAGGAGCTCCTTAGTAAAGGAC	.	Long RNA	RP11-587D21.1	.	.	.	.	-25.1	0.849554	0.78494	0.995578	T23021	0.292
147	chr11	45848200	45848297	Y	-	12	278	12.7816	32.7763	27.8177	.	.	.	Intergenic	sense	97	ctcaacacgggaaacctcacccagcctggacacggacaggattgacagattgatagctctttctcaattctgtgggtggtggtgcatggccattctt	.	Repeats	AluSz	.	.	.	.	-28.2	0.0343093	0.00408247	0.00459794	No	0.146
148	chr11	45944515	45944608	Y	+	23	531	23.1668	58.4666	53.1645	.	.	.	intron	sense	93	GTGGGGACCTGGGGTGTGAGCGCCGCGAGCCTGGCGGGCGAGCGGGGGCCCCGGGATGCTTCCCCGGCCCGCTCATGCCACGTGTCCCCCCAG	Y	RBP	GYLTL1B	EFTUD2	.	.	.	-58.1	0.272484	0.248548	0.292419	T28824,T15726,T6439	0.019
149	chr11	46450154	46450650	Y	-	20	491	20.5417	54.3995	49.1905	.	.	.	pseudogene	sense	496	GGAGGGAGTCATGGTGGCCAAGAAGGATGTCCACATGCCTAAGCACCCGGAGCTGGCAGACAAGAATGTGCCCAACCTTCATGTCATGAAGGCCATGCAGTCTCTCAAGTCCCGAGGCTACGTGAAGGAACAGTTTGCCTGGAGACATTTCTACTGGTACCTTACCAATGAGGGTATCCAGTATCTCCGTGATTACCTTCATCTGCCCCCAGAGATTGTGCCTGCCATCCTACGCCGTAGCCGTCCAGAGACTGGCAGGCCTCGGCCTAAAGGTCTGGAGGGTGAGCGACCTGCGAGACTCACAAGAGGGGAAGCTGACAGAGATACCTACAGACGGAGTGCTGTGCCACCTGGTGCCGACAAGAAAGCCGAGGCTGGGGCTGGGTCAGCAACCGAATT…	.	Long RNA	RP11-425L10.1	.	.	.	.	-161.4	0.44846	0.715179	0.904544	No	0.479
150	chr11	58537874	58538244	Y	+	8	167	8.8497	21.4962	16.7396	.	.	.	Intergenic	sense	370	agtgcaacgccacttttgtttcttgcttctgtaactcgcttcttacctcacataattcctgccttaaaatgtttaaaagtaggaaaagccctttgtttggggctcagactttctggacatatgtccagctgggccagtgatgaccttaatagactctcctgaaccttttttggtctctccagtctttgattgtcctgtaacatttctgggggcttatccgggattggagatggcagattttctgtcttctttgcctgtgggctagagccccaggatgtgggagatctggggtccttggcaccgctgggagagtttcagcctggaaggagaatggccctcccgcattccagagccttcccctgacagcacc	.	Repeats	HERV1_LTRc	.	.	.	.	-125.3	0.244573	0.243405	0.259373	No	0.003
151	chr11	61732036	61732282	Y	-	29	765	29.3453	81.9787	76.5643	.	.	.	exon	sense	246	CGCAAGATGGGAGCGCCCGAATCTGGCTTGGCGGAATATCTCTTTGACAAGCACACCCTGGGAGACAGTGATAATGAAAGCTAAGCCTCGGGCTAATTTCCCCATAGCCGTGGGGTGACTTCCCTGGTCACCAAGGCAGTGCATGCATGTTGGGGTTTCCTTTACCTTTTCTATAAGTTGTACCAAAACATCCACTTAAGTTCTTTGATTTGTACCATTCCTTCAAATAAAGAAATTTGGTACCCA	.	RBP	FTH1	AGGF1	Long RNA	BEST1	.	-63.2	0.859744	0.711085	0.662341	T29165,T28169,T28962,T3198,T28997,T37448	0.219
152	chr11	61732459	61732574	Y	-	18	432	18.58	48.3654	43.2183	.	.	.	exon	sense	115	GTGATGACTGGGAGAGCGGGCTGAATGCAATGGAGTGTGCATTACATTTGGAAAAAAATGTGAATCAGTCACTACTGGAACTGCACAAACTGGCCACTGACAAAAATGACCCCCA	.	RBP	FTH1	EFTUD2	Long RNA	BEST1	.	-22	0.820435	0.875791	0.947113	T29165,T28169,T28962,T29241,T28555,T3198,T28997,T37448	0.62
153	chr11	61734782	61735103	Y	-	82	2677	81.6932	273.67	267.72	.	.	.	exon	sense	321	AGACGTTCTTCGCCGAGAGTCGTCGGGGTTTCCTGCTTCAACAGTGCTTGGACGGAACCCGGCGCTCGTTCCCCACCCCGGCCGGCCGCCCATAGCCAGCCCTCCGTCACCTCTTCACCGCACCCTCGGACTGCCCCAAGgcccccgccgccgctccagcgccgcgcagccaccgccgccgccgccgccTCTCCTTAGTCGCCGCCATGACGACCGCGTCCACCTCGCAGGTGCGCCAGAACTACCACCAGGACTCAGAGGCCGCCATCAACCGCCAGATCAACCTGGAGCTCTACGCCTCCTACGTTTACCTGTCCATGG	.	RBP	FTH1	SERBP1	.	.	.	-88.4	0.647081	0.596231	0.596121	T29240,T28625,T28561,T29164,T28554,T28513,T3198,T28997,T37448	0.992
154	chr11	62327082	62327905	Y	-	26	611	26.0198	66.5005	61.1757	.	.	.	exon	sense	823	TAAGCGCAAGTACTCCAATGAGGACACACTCTCTGTGGCACTGCCATATTTCTGGGAGCACTTTGATAAGGACGGCTGGTCCCTGTGGTACTCAGAGTATCGCTTCCCTGAAGAACTCACTCAGACCTTCATGAGCTGCAATCTCATCACTGGTAAGAGAGTGGGTCTGAGAAGGAAGGAGAACAAGGTGTAGCAAGTGCTGTGATTCCAAAGGCTGAATGTTCTCCCTTGCCGCTTCAGGAATGTTCCAGCGACTGGACAAGCTGAGGAAGAATGCCTTCGCCAGTGTCATCCTTTTTGGAACCAACAATAGCAGCTCCATTTCTGGAGTCTGGGTCTTCCGAGGCCAGGAGCTTGCCTTTCCGGTGAGGAAGGTGGAGGAGAGGAGTCTCTTTAGGG…	.	RBP	EEF1G	PRPF8	.	.	.	-286.3	0.72742	0.626392	0.637074	T6726,T25340,T28135,T27985	0.066
155	chr11	62334277	62334441	Y	-	20	464	20.3856	51.6597	46.4772	.	Y	.	exon	sense	164	CGGAAAGAGAAGGGTTCACGGGAAGAGAAGCAGAAGCCCCAGGCTGAGCGGAAGGAGGAGAAAAAGGCGGCTGCCCCTGCTCCTGAGGAGGAGATGGATGAATGTGAGCAGGCGCTGGCTGCTGAGCCCAAGGCCAAGGACCCCTTCGCTCACCTGCCCAAGAG	.	RBP	EEF1G	UCHL5	.	.	.	-52	0.87878	0.953988	0.934134	T28135,T6725,T27984,T25339	0.329
156	chr11	62338466	62338554	Y	-	6	106	6.84089	15.1452	10.6139	.	.	.	exon	sense	88	GAGGCGAATTCTGGGGCTGCTGGATGCTTACTTGAAGACGAGGACTTTTCTGGTGGGCGAACGAGTGACATTGGCTGACATCACAGTT	.	RBP	EEF1G	DDX55	.	.	.	-18.1	0.989205	0.98233	0.981886	T25338	0.943
157	chr11	62340085	62340196	Y	-	9	182	9.77897	23.0271	18.2434	.	.	.	exon	sense	111	GAAAACTGGAGGGCCTTCAAGGCTCTCATCGCTGCTCAGTACAGCGGGGCTCAGGTCCGCGTGCTCTCCGCACCACCCCACTTCCATTTTGGCCAAACCAACCGCACCCCT	.	RBP	EEF1G	DDX6	.	.	.	-31.1	0.993108	0.999153	0.999225	No	0.14
158	chr11	62370150	62370230	Y	-	7	139	7.85826	18.5632	13.9133	Y	.	ALL_AGO|slc8677_chr11|41|3|8|0.38|COORDS=chr11-:62126720	intron	sense	80	GTGAGGCCGCGGGGATCGCCGGGGTGGGACCGGTGGGCCCGAGGGCTCAGCCGCCACCGCAACTCTTCCCTCCGGCCCAG	Y	RBP	EML3	TROVE2	.	.	.	-42.3	0.128663	0.148025	0.1879	T19443	0.119
159	chr11	63978562	63978746	Y	+	143	4793	140.766	485.726	479.362	.	.	ALL_AGO|slc2792_chr11|55|35|38|0.92|COORDS=chr11+:63735293	exon	sense	184	CTGagaagaaggagaagaagaagaaagagaaggagCCAGAGGAAGAGCTCTATGACTTGAGCAAGGTTGTCTTGGCTGGGGGTGAGTGCAAGTGGGGGTGGGCCTGGGGGGTTGGGGGCAGGGGCCGGCCCGTGAGTCCCAGCCCTGGGGGACAGGCCTGGTTGACTCCCAACCTGCACTCCAG	.	RBP	FERMT3	DDX24	.	.	.	-74.2	0.269587	0.385103	0.478152	No	0.002
160	chr11	64875109	64875274	Y	+	5	76	5.83106	12.0963	7.69906	.	.	.	exon	sense	165	TGGCCACCAACATGGCAGTGATCACCGACTTCAGCGCTCGCATCAGCGCCACGCTGCAGGACCGCCACGAGCGCATCACCAAGCTGGCAGGTGGGCGCTGCCGGGCAGGGCCTGCAGTGGGCCTTTCCTGGGGCTCTGGGGCTAACGTCACCCTCCGTCCCCCAG	.	RBP	VPS51	GRWD1	.	.	.	-72.8	0.573873	0.597242	0.5708	No	0.09
161	chr11	64888141	64888277	Y	-	7	138	7.8546	18.4731	13.8243	.	.	.	exon	sense	136	TGGCCAAACAGGAGAAGAAGAAGAAGAAGACAGGTCGGGCTAAGCGGCGGATGCAGTACAACCGGCGCTTTGTCAACGTTGTGCCCACCTTTGGCAAGAAGAAGGGCCCCAATGCCAACTCTTAAGTCTTTTGTAA	.	Long RNA	FAU	.	.	.	.	-38.1	0.804449	0.914559	0.910294	T28563	0.133
162	chr11	64888992	64889211	Y	-	10	227	10.8369	27.6553	22.7867	.	.	.	exon	sense	219	GGTAAGGCTGCTTGGTGCGCCCTGGGTTCCATTTTCTTGTGCTCTTCACTCTCGCGGCCCGAGGGAACGCTTACGAGCCTTATCTTTCCCTGTAGGCTCATGTAGCCTCACTGGAGGGCATTGCCCCGGAAGATCAAGTCGTGCTCCTGGCAGGCGCGCCCCTGGAGGATGAGGCCACTCTGGGCCAGTGCGGGGTGGAGGCCCTGACTACCCTGGAAG	.	RBP	FAU	EFTUD2	.	.	.	-84.7	0.343379	0.501922	0.499502	T28563	0.488
163	chr11	65266515	65267064	Y	+	6	120	6.90273	16.6652	12.0326	.	.	.	exon	sense	549	AGGCATTGAGGCAGCCAGCGCAGGGGCTTCTGCTGAGGGGGCAGGCGGAGCTTGAGGAAACCGCAGATAAGTTTTTTTCTCTTTGAAAGATAGAGATTAATACAACTACTTAAAAAATATAGTCAATAGGTTACTAAGATATTGCTTAGCGTTAAGTTTTTAACGTAATTTTAATAGCTTAAGATTTTAAGAGAAAATATGAAGACTTAGAAGAGTAGCATGAGGAAGGAAAAGATAAAAGGTTTCTAAAACATGACGGAGGTTGAGATGAAGCTTCTTCATGGAGTAAAAAATGTATTTAAAAGAAAATTGAGAGAAAGGACTACAGAGCCCCGAATTAATACCAATAGAAGGGCAATGCTTTTAGATTAAAATGAAGGTGACTTAAACAGCTTAAAG…	.	RBP	MALAT1	LARP7,AUH	.	.	.	-117.7	0.0336047	0.0562641	0.0444699	No	0.028
164	chr11	65273309	65273587	Y	+	538	22302	531.511	2237.73	2230.29	.	.	ALL_AGO|slc3044_chr11|67|2|9|0.22|COORDS=chr11+:65030083;ALL_AGO|slc3042_chr11|64|3|5|0.60|COORDS=chr11+:65029975;ALL_AGO|slc3045_chr11|45|5|14|0.36|COORDS=chr11+:65030155	exon	sense	278	ACTGTAATGCTGGGTGGGAACATGTAACTTGTAGACTGGAGAAGATAGGCATTTGAGTGGCTGAGAGGGCTTTTGGGTGGGAATGCAAAAATTCTCTGCTAAGACTTTTTCAGGTGAACATAACAGACTTGGCCAAGCTAGCATCTTAGCGGAAGCTGATCTCCAATGCTCTTCAGTAGGGTCATGAAGGTTTTTCTTTTCCTGAGAAAACAACACGTATTGTTTTCTCAGGTTTTGCTTTTTGGCCTTTTTCTAGCTTAAAAAAAAAAAAAGCAAAA	.	RBP	MALAT1	GTF2F1	.	.	.	-77	0.640446	0.691741	0.67895	T29182	0.016
165	chr11	65622307	65622903	Y	-	6	115	6.88207	16.0717	11.5085	.	.	.	exon	sense	596	GCAAGCAAACTGCTACGAGGAGGTCAAGGACCGCTGCACCCTGGCAGAGAAGCTGGGGGGCAGTGCCGTCATCTCCCTGGAGGGCAAGCCTTTGTGAGCCCCTTCTGGCCCCCTGCCTGGAGCATCTGGCAGCCCCACACCTGCCCTTGGGGGTTGCAGGCTGCCCCCTTCCTGCCAGACCGGAGGGGCTGGGGGGATCCCAGCAGGGGGAGGGCAATCCCTTCACCCCAGTTGCCAAACAGACCCCCCACCCCCTGGATTTTCCTTCTCCCTCCATCCCTTGACGGTTCTGGCCTTCCCAAACTGCTTTTGATCTTTTGATTCCTCTTGGGCTGAAGCAGACCAAGTTCCCCCCAGGCACCCCAGTTGTGGGGGAGCCTGTATTTTTTTTAACAACAT…	.	RBP	CFL1	UPF1	Long RNA	SNX32	.	-218.3	0.859309	0.820111	0.815668	No	0.011
166	chr11	65623412	65623620	Y	-	6	92	6.74587	13.6847	9.22636	.	.	.	exon	sense	208	AAGAAGGCGGTGCTCTTCTGCCTGAGTGAGGACAAGAAGAACATCATCCTGGAGGAGGGCAAGGAGATCCTGGTGGGCGATGTGGGCCAGACTGTCGACGACCCCTACGCCACCTTTGTCAAGATGCTGCCAGATAAGGACTGCCGCTATGCCCTCTATGATGCAACCTATGAGACCAAGGAGAGCAAGAAGGAGGATCTGGTGTTTA	.	RBP	CFL1	XRCC6	Long RNA	SNX32	.	-57.9	0.985327	0.954668	0.982144	No	0.855
167	chr11	65686789	65686995	Y	+	8	167	8.85014	21.5078	16.742	.	.	.	exon	sense	206	GGCACTAGGGCCCTGCGAGCGGCGTCTTAACCGGCGGCGCTAGGACTCCGCGGGAAACGGCGGGGGCGGAGCGGGCGGCACCAGGACCCAGGGGAACCGCGACGGGCGGGCGGCGAGCAGGCCCGGGAGCCGGGAGGCTGCGGGCGGCGGCGCTGGACCCGACGCGGCGAGAGAGGCCCCGAGATGCCGAGCAAGAAGAAGAAGTA	.	RBP	DRAP1	DDX3X	.	.	.	-97.9	0.391553	0.515796	0.589403	No	0.106
168	chr11	66407203	66407419	Y	+	12	286	12.8125	33.6498	28.6428	.	.	.	exon	sense	216	AACCTGCCCCGGGAGGCTACAGAGCAGGAGATTCGCTCACTCTTCGAGCAGTATGGGAAGGTGCTGGAATGTGACATCATTAAGAATTACGGCTTTGTGCACATAGAAGACAAGACGGCAGCTGAGGATGCCATACGCAACCTGCACCATTACAAGCTTCATGGGGTGAACATCAACGTGGAAGCCAGCAAGAATAAGAGCAAAACCTCAACAAAG	.	RBP	RBM4	HLTF	.	.	.	-48.8	0.943046	0.994241	0.989986	No	0.7
169	chr11	66410925	66411037	Y	+	10	189	10.6397	23.7873	18.9679	.	.	.	exon	sense	112	CGAATGCACGTGCAGTTGTCCACCAGCCGGCTTAGGACTGCGCCCGGGATGGGAGACCAGAGCGGCTGCTATCGGTGCGGGAAAGAGGGGCACTGGTCCAAAGAGTGTCCGA	.	RBP	RBM4	UCHL5	.	.	.	-38.1	0.999152	0.99917	0.984598	No	0.605
170	chr11	66411156	66411600	Y	+	11	232	11.719	28.1325	23.2073	.	.	ALL_AGO|slc3288_chr11|56|3|6|0.50|COORDS=chr11+:66167874	exon	sense	444	GCGCTCGATGCCTACTACAAGCGCTGCCGTGCTGCCCGGTCCTATGAGGCAGTGGCAGCTGCAGCTGCCTCCGTGTATAATTACGCAGAGCAGACCCTGTCCCAGCTGCCACAAGTCCAGAATACAGCCATGGCCAGTCACCTCACCTCCACCTCTCTCGATCCCTACGATAGACACCTGTTGCCGACCTCAGGAgctgctgccacagctgctgctgcagcagcagccgctgctgctgttactgcagctTCCACTTCATATTACGGGCGGGATCGGAGCCCCCTGCGTCGCGCTACAGCCCCAGTCCCCACTGTTGGAGAGGGCTACGGTTACGGGCATGAGAGTGAGTTGTCCCAAGCTTCAGCAGCCGCGCGGAATTCTCTGTACGACATGGCCCGG…	.	RBP	RBM4	YBX3	.	.	.	-170.7	0.987912	0.995394	0.986727	No	0.084
171	chr11	66444337	66444517	Y	-	13	248	13.3945	29.786	24.8789	.	.	.	exon	sense	180	GAGGCTACAGAGCAGGAGATTCGCTCACTCTTCGAGCAGTATGGGAAGGTGCTGGAATGTGACATCATTAAGAATTACGGCTTTGTGCACATAGAAGACAAGACGGCAGCTGAGGATGCCATACGCAACCTGCACCATTACAAGCTTCATGGGGTGAACATCAACGTGGAAGCCAGCAAG	.	RBP	RBM4B	EFTUD2	.	.	.	-41.1	0.794433	0.992822	0.985517	No	0.759
172	chr11	67068618	67068753	Y	+	10	179	10.5533	22.7247	17.9201	.	.	.	intron	sense	135	GTGAGAGGCTGGGCACAGGCAGCGGGAGGACCTCAGGCATGGCACCCTCCCTCAGCGCAGTCCCTGGAGAGCTGCAGGGGCCGGAGGCACAGGTGGCTCTCCGCCAGGGCTCAGGCGTGGCTGTCTTCTCACAGA	Y	RBP	ANKRD13D	PRPF8	.	.	.	-63.7	0.139615	0.0778074	0.100696	No	0.05
173	chr11	67166332	67166579	Y	-	5	75	5.82447	11.9939	7.59992	Y	.	ALL_AGO|slc9278_chr11|62|1|8|0.12|COORDS=chr11-:66922981	exon	sense	247	AGATGTGCCTGACCAGGGCCTGCTGTGTGACCTGCTGTGGTCTGACCCTGACAAGGACGTGCAGGGCTGGGGCGAGAACGACCGTGGCGTCTCTTTTACCTTTGGAGCCGAGGTGGTGGCCAAGTTCCTCCACAAGCACGACTTGGACCTCATCTGCCGAGCACACCAGGTGGGCTGGTGGCTCCGGCCTGCGGCAGGGGAAGGGGAGGGCCGTGCCTGCGCTCGGGACTGACTGCTCCCATCCTCG	.	RBP	PPP1CA	PPIG	.	.	.	-99	0.138915	0.614364	0.66481	No	0.884
174	chr11	67183012	67183217	Y	-	13	269	13.5685	31.9189	26.9717	.	.	.	.	sense	205	tcggcgggcgtggcgggcggactcggaccgggcgggatgcagcggcggcggcggtggcagtggcACAGCGCCCGGCCCAAGCGGCGCCGCTTTATATAGAAACGCCTGGGGCATGCCCAGTGCCCAGCGGGGGCGGCGCGGGGCGGACGGACCGACAGGGACCGATAGGGAcccgccggggacgcgcccccccccccccccgccc	.	Repeats	(CCG)n	.	.	.	.	-111.8	0.0900098	0.103376	0.139829	No	0.552
175	chr11	67203098	67203422	Y	-	11	239	11.7545	28.8507	23.956	.	.	.	exon	sense	324	GGAGAGGCGTCCAGCCCAGAGCAGGTCCCCGTGCGGGCTGAGGAAGCCAGAGACAGTGACACGGAGGGCGACCTGGTCCTCGGCTCCCCAGGACCAGCGAGCGCAGGGGGCAGTGCTGAGGCCCTGCTGAGTGACCTGCACGCCTTTGCTGGCAGCGCAGCCTGGGATGACAGCGCCAGGGCAGCTGGGGGCCAGGGCCTCCATGTCACCGCACTGTAGAGGCCGGTCTTGGTGTCCCATCCCTGTCACAGCCGCTCACTCCCCGTGCCTCTGCTTCCCAAGATGCCATGGCTGGACTGGACCCCCAGCCCACATGACCATGCC	.	Long RNA	PTPRCAP	.	.	.	.	-140.1	0.315466	0.292599	0.265201	T37013,T6493	0.556
176	chr11	67450228	67450556	N	-	10	232	10.8506	28.0801	23.2069	.	.	ALL_AGO|slc9025_chr5|38|2|8|0.25|COORDS=chr5-:40868346	pseudogene	sense	328	CTTTCTGGTCTCGGCCGCAGAAGCGAGATGACGAAGGGAGCATCATCGTTTGGAAAGCATCGCAATAAGACACACACGTTGTGCCGCTGCTGTGGCTCTGAGGCCTACCACCTTCAGAAGTCGACCTGTGGCAAATGTGGCTACTCTGCCAAGCGCAAGAGAAAGTATAACTGGAGTGCCAAGGCTAAAAGATGAAAAACCACCAGAACTGGTCGAATGAGGCACCTAAAAATTGTATAACACAGATTCAGGCATGGATTCCGTGAAGGAACAACACCTAAACCCAAGAGGGCAGCTGTTGCAGCATCCAGTTCATCTTAAGAATGTC	.	Long RNA	RPL37P2	.	.	.	.	-82.4	0	0	0	No	0.566
177	chr11	68646546	68646645	Y	-	5	90	5.8992	13.4676	9.02181	.	.	.	Intergenic	sense	99	tgGAAAGAAAGAGAGAGAGAGAGagggagggaggaggggaggaagggaagggaaggaaagaaaggaaagaaggaaggaaggaaggaaagaaagaaAAGA	.	Repeats	CT-rich	.	.	.	.	0	0.0204211	0.0203684	0.0221316	No	1
178	chr11	70243841	70244065	Y	+	6	103	6.82661	14.8784	10.3278	.	.	.	.	sense	224	tcggcctctgcatgacctggcccctctcacaccacagctccgctgcaccactagccctctaccatgctgagctgagcctcctccagttcccctgctgcaagaccgttcctgccttgggacctctgttggccctgctgttggaacctgctgttggcctgcctggaaaattcttccctccttaccttgtttactcttatagggccttcacatcttggctaacatgt	.	Repeats	L2c	.	.	.	.	-53.1	0.0781741	0.0344196	0.0476071	No	0.34
179	chr11	71715145	71715270	Y	-	6	104	6.83455	15.024	10.4935	.	.	.	intron	sense	125	GTGAGGCTGGGGCTGAAGGGGGATGAAGCGACGCCCTGGCGGGACCTTGCTGATAGAGCGTGGCACAGCACGCTGGCCTGGGAAGGCAGCATTGGGTCTCCCGGTCTGACAGCCCTTCCTTGCAG	Y	Long RNA	NUMA1	.	Long RNA	IL18BP	.	-55.9	0.063136	0.07388	0.06296	No	0.053
180	chr11	74456757	74457242	Y	-	21	493	21.3564	54.5231	49.3096	.	.	ALL_AGO|slc5965_chr6|43|2|5|0.40|COORDS=chr6+:133177821;ALL_AGO|slc5964_chr6|40|26|55|0.47|COORDS=chr6+:133177562	pseudogene	sense	485	GCCCTTTCCCTCCTGCCGCCGAGTCGCGCGGAGGCGGAGGCTTGGGTGCGTTCAAGATTCAGGTTCACCCGTAACCCACTGCCATGGCCGAGGAAGGCATTGCTGCTGGAGGTGTAATGGAGGTTAATACTGCTTTACAAGAGGTGCTGAAGACCGCCCTCATCCACGATGGCCTAGCACGTGGAATTCGCGAAGCTGCCAAAGTCTTAGACAAGCGCCAAGCCCATCTTTGTGTGCTTGCATCCAACTGTGATGAGCCTATGTATGTCAAGTTGGTGGAGGCCCTTTGTGCTGAACACCAAATCAACCTAATTAAGGTTGATGACAACAAGAAACTAGGAGAATGGGTAGGCCTCTGTAAAATTGACAGAGAGGGGAAACCCCATAAAGTGGTTGGTT…	.	Long RNA	RP11-864N7.2	.	.	.	.	-153.8	0.7556	0.842631	0.902074	T18291	0.076
181	chr11	75111738	75111859	Y	+	9	155	9.59387	20.3098	15.5751	.	.	ALL_AGO|slc3861_chr11|37|3|10|0.30|COORDS=chr11+:74789410	exon	sense	121	TTGTCGCTGATGGCATCTTCAAAGCTGAACTGAATGAGTTTCTTACTCGGGAGCTGGCTGAAGATGGCTACTCTGGAGTTGAGGTGCGAGTTACACCAACCAGGACAGAAATCATTATCTT	.	RBP	RPS3	DHX30	.	.	.	-32	0.800364	0.978066	0.989479	No	0.232
182	chr11	75113396	75113470	Y	+	11	249	11.799	29.9115	24.9703	.	.	.	exon	sense	74	TTTATGCTGAAAAGGTGGCCACTAGAGGTCTGTGTGCCATTGCCCAGGCAGAGTCTCTGCGTTACAAACTCCTA	.	RBP	RPS3	DROSHA	.	.	.	-19.7	0.872	0.97627	0.975068	No	0.186
183	chr11	75115077	75115212	Y	+	18	445	18.6461	49.8046	44.5821	.	.	ALL_AGO|slc3863_chr11|51|3|9|0.33|COORDS=chr11+:74792840	exon	sense	135	TGCTGCGGTTCATCATGGAGAGTGGGGCCAAAGGCTGCGAGGTTGTGGTGTCTGGGAAACTCCGAGGACAGAGGGCTAAATCCATGAAGTTTGTGGATGGCCTGATGATCCACAGCGGAGACCCTGTTAACTACT	.	RBP	RPS3	DHX30	.	.	.	-44	0.824148	0.991481	0.991222	T28119,T28167	0.138
184	chr11	75115734	75115908	Y	+	12	239	12.5742	28.9211	23.9883	.	.	.	exon	sense	174	GAAGATCATGCTGCCCTGGGACCCAACTGGTAAGATTGGCCCTAAGAAGCCCCTGCCTGACCACGTGAGCATTGTGGAACCCAAAGATGAGATACTGCCCACCACCCCCATCTCAGAACAGAAGGGTGGGAAGCCAGAGCCGCCTGCCATGCCCCAGCCAGTCCCCACAGCATA	.	RBP	RPS3	CDC40	.	.	.	-44.4	0.737299	0.975029	0.981368	T28119,T28167	0.485
185	chr11	82400631	82400921	Y	+	15	317	15.4759	36.8584	31.7893	.	.	.	pseudogene	sense	290	TGGCCAGGGTCACCAAGGTCCTGGGCAGGACCGGTTCTCAGGGACAGTGCACGCAGGTGCGCGTGGAATTCATGGACGACACGAGCCGATCCATCATCCGCAATGTAAAAGGCCCCGTGCGCGAGGGCGACGTGCTCACCCTTTTGGAGTCAGAGCGAGAAGCCCGGAGGTTGCGCTGAGCTTGGCTGCTCGCTGGGTCTTGGATGTCGGGTTCGACCACTTGGCCGATGGGAATGGTCTGTCACAATCTGCTCCTTTTTTTTGTCCGCCACACGTAACTGAGATGCTCC	.	Long RNA	RP11-742N3.1	.	Long RNA	RP11-179A16.1	.	-106	0.491976	0.335693	0.630431	T22771	0.705
186	chr11	85719850	85719972	Y	+	7	127	7.80184	17.3768	12.7279	.	.	.	.	sense	122	Tggccgggcgcggtggctcacgcctgtaatcccagctctcagggaggctaagaggcgggaggatagcttgagcccaggagtttgagacctgcctgggcaatatagtgagaccccgttctcca	.	Repeats	FLAM_C	.	.	.	.	-51.3	0.188754	0.188213	0.190344	No	0.017
187	chr11	85760587	85760664	Y	-	10	233	10.8545	28.2057	23.3212	.	.	.	.	sense	77	cgagattgcgccactgcactccagcctgggtgacagagtgagactctttctcagggaaaaggaaaaaaaaagggaaa	.	Repeats	AluSz6	.	.	.	.	-16	0.0113247	0.0112468	0.0128312	No	0.234
188	chr11	94800535	94801239	Y	+	9	141	9.44051	18.8552	14.1654	.	.	.	exon	sense	704	CCCACACCAAGGCGCCCCGGGGCTTCGCTTTCGTCCGCTTTCACGACCGGCGCGACGCCCAAGACGCCGAGGCCGCCATGGACGGGGCGGAGCTGGACGGACGCGAGCTGCGGGTGCAGGTGGCGCGCTATGGCCGCCGGGACCTGCCCCGCAGCCGCCAGGGAGAGCCACGCGGCAGGTCCAGAGGCGGCGGCTACGGACGGCGGAGCCGCAGCTACGGGCGGCGGAGCCGCAGCCCCAGGCGGCGACACCGCAGCCGATCCCGGGGTCCCAGCTGCTCCAGGTCCCGCAGCCGATCTCGCTATAGGGGTTCTCGCTATAGCCGGTCTCCCTACAGCCGATCTCCTTACAGCCGGTCGCGCTACAGCGCTCTCCCTACAGCAGATCTCGCTACAGGGA…	.	RBP	SRSF8	FTO	.	.	.	-288.4	0.177565	0.124099	0.835352	T34433	0.266
189	chr11	103277968	103278038	N	-	148	4665	143.591	472.771	466.568	.	.	.	pseudogene	sense	70	AAGTAAGGTCAGATAAATAAGCTATCAGGCCCATACCCTGAAAATGCTGGTTATCTCCTTCCTGTACTAA	.	Long RNA	RP11-37O16.2	.	Long RNA	DYNC2H1	.	-17	0	0	0	No	0.011
190	chr11	107779072	107779478	N	+	25	627	25.356	68.091	62.7211	.	.	.	pseudogene	sense	406	CTTTTCCTCCCTGATGCAAACGAGGTCGCACGCATGAGGCTTCTCCGCCGCCGCCGCCGCAGACGCCGCGGCGATGCGCTACGTCGCCTCCTACCTGCTGGCTGCCCTCGGGGGTAACTCCTCCCCCAGCGCCAAGGACATCAAGAAGATCTTGGACAGCGTGGGCATCGAGGAGGATTACGACCGGCTCAACAAGGTTATCAGTGAGCTGAATGGAGAAAACAATGAAGACGTCATTGCCTAGAGTATTGGCAAGCTTGCCAGTGTACCTGCCGGTGTGGCTGTGGCCATCTCTGTTGCCCCAGGCTCTGCAGCCCCTGCTGCTGGTTCCGCCCCTGCTGCAGCAGAGGAGAAGAAAGATGAGAAGGAGGAGTCTGAGGAGTCGGACGATGACATGGG…	.	Long RNA	RP11-832N8.1	.	Long RNA	SLC35F2	.	-149.5	0	0	0	No	0.658
191	chr11	111760046	111760135	N	-	10	223	10.8202	27.1828	22.3246	.	.	.	pseudogene	sense	89	TGGAAAATGGTGAAGGAAATTGAAATCAGCCAGCACACCAAGTACACTTGCTCTTTCTGTGGCAAAACCAAGATGAAGAGACGAGCTGT	.	Long RNA	RPL37AP8	.	.	.	.	-18.1	0	0	0	No	0.16
192	chr11	116706546	116706824	Y	-	5	83	5.86738	12.7408	8.31952	.	.	.	exon	sense	278	GGGCGAGGAGATGCGCGACCGCGCGCGCGCCCATGTGGACGCGCTGCGCACGCATCTGGCCCCCTACAGCGACGAGCTGCGCCAGCGCTTGGCCGCGCGCCTTGAGGCTCTCAAGGAGAACGGCGGCGCCAGACTGGCCGAGTACCACGCCAAGGCCACCGAGCATCTGAGCACGCTCAGCGAGAAGGCCAAGCCCGCGCTCGAGGACCTCCGCCAAGGCCTGCTGCCCGTGCTGGAGAGCTTCAAGGTCAGCTTCCTGAGCGCTCTCGAGGAGTACA	.	RBP	APOA1	DHX30	.	.	.	-122.5	0.440176	0.27341	0.288939	No	0.323
193	chr11	116906514	116906610	Y	-	11	235	11.7348	28.4395	23.5459	.	.	.	pseudogene	sense	96	TAGTTTTGTGTGTTGGCTGCTCCACTGTCCTCTGCCAGCCTACAGGAGGAAAAGCAAGGCTTACAGAAGGATGTTCCTTCAGGAGGAAGCAGCACT	.	Long RNA	AP000936.1	.	.	.	.	-29.2	0.767375	0.947396	0.998479	T19252	0.057
194	chr11	117115640	117115753	Y	+	10	230	10.8471	27.9684	23.0443	.	.	.	intron	sense	113	gaaagGAGGCCTTTTTATTTCAGTTAACTCAAAAATAAAATTAAAGTTTGAGCCATCCATGCCCGGCTCAAACTTTAATTTTATTTTTGAGTTAATTGAAATAAAAAGGCAAg	.	Long RNA	RNF214	.	.	.	.	-64.6	0.425248	0.428301	0.502088	No	0
195	chr11	118622407	118622558	Y	-	7	148	7.89416	19.592	14.8933	.	.	.	exon	sense	151	GTTTTCTGGGGAAAGGGGACAAGGAAGGAAAAGAAAGAAGAGAAGGGGAGAAACCCTAAAAAGAGAAGAATCTTAATGAACACACAAGCTTGTCAATGATTTCAAAATTCTCCAACAGCTGACTCTCGTGCATTTCAACTTCTCCCTGATT	.	RBP	DDX6	SLTM	.	.	.	-28.1	0.971881	0.937106	0.951589	No	0.265
196	chr11	123317609	123317685	Y	+	10	211	10.774	26.0697	21.195	.	.	.	.	sense	76	tcggaagaaagaaagaaaagaaaagaaaggaaagaaagaaaaagaaagggagaaagagagaaagagaaagagagGC	.	Repeats	GA-rich	.	.	.	.	0	0.0169079	0.0158947	0.0196711	No	1
197	chr11	124609834	124609996	Y	+	57	1767	57.0875	182.563	176.715	.	.	.	exon	sense	162	GGGAGACCGGACCCGAGAGCAGAGCTGCTGTTTCGGCGCGGGTCGGCTGGCGGCCGACTGCCCCAGAGCCCCCACCCGGCACCACACAGACCCCACCCCCGCCCTGCGCCAGCCTTCGTCCCCGCAGAGGACCCCCCGACACCAGCATGGACTGCTGCACCG	.	Long RNA	NRGN	.	.	.	.	-52.9	0.529444	0.560105	0.534191	T3632	0.98
198	chr11	124615398	124615636	Y	+	11	223	11.6678	27.2387	22.3411	.	.	.	exon	sense	238	GAGAACGCCTGCTCCAAGCCGGACGACGACATTCTAGACATCCCGCTGGACGATCCCGGCGCCAACGCGGCCGCCGCCAAAATCCAGGCGAGTTTTCGGGGCCACATGGCGCGGAAGAAGATAAAGAGCGGAGAGCGCGGCCGGAAgggcccgggccctggggggcctggcggagctggggtggcccggggaggcgcgggcggcggccccAGCGGAGACTAGGCCAGGTGAGGCGGGC	.	RBP	NRGN	PRPF8	Long RNA	RP11-677M14.2	.	-111.1	0.947613	0.915609	0.923416	T3632	0.17
199	chr11	124616331	124617097	Y	+	19	476	19.6313	52.9192	47.6674	.	.	.	exon	sense	766	CGCAGCGACGAGACTTCCCTGCCGTGTTTGTGACCCCCTCCTGCCCAGCAACCTGCCAGCTACAGGAGCCCCCTGCGTCCCAGAGACTCCCTCACCCAGGCAGGCTCCGTCGCGGAGTCGCTGAGTCCGTGCCCTTTTAGTTAGTTCTGCAGTCTAGTATGGTCCCCATTTGCCCTTCCACTCCACCCCACCCTAAACCATGCGCTCCCAATCTTCCTTCTTTTGCTTCTCGCCCACCTCTTCCCGCACCCAGCATGCAGCTCTGCCTCCGCAGCCTCAGTGCGCTTTCCTGCGCGCACTGCGGAGGGCGCCCTAAGCGTCACCCAAGCACACTCACTTAAAGAAAAAACGAGTTCTTTCGTTCTGTGCGCAGCTAAAAGGGGCGCCCTACATCTCCGT…	.	RBP	NRGN	YBX3	.	.	.	-256.3	0.704132	0.477069	0.487242	T3633,T3634,T16655,T16654	0.614
200	chr11	128330669	128330897	Y	-	7	131	7.82317	17.781	13.1451	.	.	.	exon	sense	228	GACTTGGCTGTCTTTGGAAGAGAAGTGCAAGGCTTTCCTTTGAAGAATTTAAATTAGTCCGGTAGGATGTCAGGTGAGACTGTGTATGCAAAATGAATGGCACAGGTGATGCCAGGGCCTCTTGCTTGGGTCTGATGTCTTGGCACAGGGTAAGTGAAGGTTAATTCCAGAAGAGAGGAATGACTTGAAGGCAAAGGAAACTAAGGAAGGAGGTTCAGTGAGGAAAAT	.	Long RNA	ETS1	.	.	.	.	-60.7	0.18107	0.105605	0.148281	No	0.019
201	chr11	128800467	128800847	Y	-	10	107	9.14058	15.2896	10.7446	.	.	.	Intergenic	sense	380	GCCTCCCTAaccccggcctccctaaccccggcctccctaaccccggcctccctaaccccagcctccctaaccccctggcctccctaaccccggcctccctaaccccggcctccctaaccccggcctccctaaccccagcctccctaaccccggcctccctaaccccggcctccctaaccctggcctccctaaccccggcctccctaaccccggcctccctaaccccggcctcCTTAACCCCTGGCCTccctaaccccagcctccctaccctggcctccctaaccccggcctccctaaccccagcctccctaaccccggcctccctaaccctaggcctccctaaccccggcctccctaaccctaggcctccctaacccctg	.	Repeats	(CTGGGG)n	.	.	.	.	-71.4	0.0715789	0.0710105	0.921476	No	0
202	chr11	133906961	133907022	Y	+	9	136	9.36566	18.2786	13.6172	.	.	.	.	sense	61	ctcgactcttctccactcttctcgactcttctccactcttctcgactcttctccactctCC	.	Repeats	CT-rich	.	.	.	.	-0.6	0.029082	0.00190164	0.00193443	No	0.175
203	chr12	862295	862840	Y	+	6	119	6.90005	16.5813	11.9732	.	.	.	exon	sense	545	GGGCCTAGCCCGCCCAGCTCGGCGAGCGGCGGCAGTGGGAGCCGCGTCCGCCGCATCCGCCTCGACTCGGTGCCGGCCCCTGGCCCTCCCCTCATGACTGCGGCGCCTCTGCTGCCACCGCCCGCCCGGCCGCCGCTCGCCGCAGGATGGATGCGGACCGTGCGGCGCTAACCCCCGTGGCTCAGCTCCCGAATCGCCCGCCTTCGAGCCCTCCTCGTGAGCCGCAGCAGCCTCGGTGCCAGCCCCCGCCGCAGCTGGGCCCAGCGGTCCGCCTGTCCCTCGTTGCGGCTTGTCGGTGCTGAGTGAGGCGTCGTCCGGGTCGGCGCGAACCCGCCCGGCCGCGGTTCCCTGCAGACCTCTGCGCGGGCGGCTCGGCCCTTCACGCCCTTTTCGTTCACG…	.	RBP	WNK1	FXR2	.	.	.	-251.5	0.400818	0.554081	0.547587	No	0.671
204	chr12	863242	863466	Y	+	23	589	23.5183	64.3293	58.9906	.	.	.	exon	sense	224	TTGTGGGGAGCAAAGAGGAGCCGCCGCCGGCGAGAAGTGGCAGCGGCGGCGGCAGCGCCAAGGAGCCACAGGAGGAACGGAGCCAGCAGCAGGATGATATCGAAGAGCTGGAGACCAAGGCCGTGGGAATGTCTAACGATGGCCGCTTTCTCAAGTTTGACATCGAAATCGGCAGAGGCTCCTTTAAGACGGTCTACAAAGGTCTGGACACTGAAACCACCGTG	.	RBP	WNK1	PPIG	.	.	.	-73.6	0.674254	0.859067	0.850049	No	0.102
205	chr12	3320773	3321119	Y	-	85	2659	84.0991	271.936	265.987	.	.	.	pseudogene	sense	346	TGCTTTCCGGTGGTGACGACCTACGCACACGAGAACATGCCTCTCGCAAAGGATCTCCTTCATCCCTCTCCAGAAGAGGAGAAGAGGAAACACAAGAAGAAACGCCTGGTGCAGAGCCCCAATTCCTACTTCATGGATGTGAAATGCCCAGGATGCTATAAAATCACCACGGTCTTTAGCCATGCACAAACAGTAGTTTTGTGTGTTGGCTGCTCCACTGTCCTCTGCCAGCCTACAGGAGGAAAAGCAAGGCTTACAGAAGGATGTTCCTTCAGGAGGAAGCAGCACTAAAAGCACTCTGAGTCAAGATGAGTGGGAAACCATCTCAATAAACACATTTTGGATA	.	Long RNA	RP11-543P15.1	.	Long RNA	TSPAN9	.	-96.1	0.265566	0.667257	0.824908	T25185	0.057
206	chr12	6646760	6647152	Y	+	14	291	14.5087	34.1839	29.1595	.	.	ALL_AGO|slc13257_chr5|46|2|6|0.33|COORDS=chr5-:159310124	exon	sense	392	TGCCATCACTGCCACCCAGAAGACTGTGGATGGCCCCTCCGGGAAACTGTGGCGTGATGGCCGCGGGGCTCTCCAGAACATCATCCCTGCCTCTACTGGCGCTGCCAAGGCTGTGGGCAAGGTCATCCCTGAGCTGAACGGGAAGCTCACTGGCATGGCCTTCCGTGTCCCCACTGCCAACGTGTCAGTGGTGGACCTGACCTGCCGTCTAGAAAAACCTGCCAAATATGATGACATCAAGAAGGTGGTGAAGCAGGCGTCGGAGGGCCCCCTCAAGGGCATCCTGGGCTACACTGAGCACCAGGTGGTCTCCTCTGACTTCAACAGCGACACCCACTCCTCCACCTTTGACGCTGGGGCTGGCATTGCCCTCAACGACCACTTTGTCAAGC	.	RBP	GAPDH	SERBP1	Long RNA	RP5-940J5.9	.	-145.2	0.900885	0.945566	0.964347	T22815	0.141
207	chr12	6647265	6647535	Y	+	8	145	8.73811	19.2812	14.5843	.	.	ALL_AGO|slc13257_chr5|46|2|6|0.33|COORDS=chr5-:159310124	exon	sense	270	GGTATGACAACGAATTTGGCTACAGCAACAGGGTGGTGGACCTCATGGCCCACATGGCCTCCAAGGAGTAAGACCCCTGGACCACCAGCCCCAGCAAGAGCACAAGAGGAAGAGAGAGACCCTCACTGCTGGGGAGTCCCTGCCACACTCAGTCCCCCACCACACTGAATCTCCCCTCCTCACAGTTGCCATGTAGACCCCTTGAAGAGGGGAGGGGCCTAGGGAGCCGCACCTTGTCATGTACCATCAATAAAGTACCCTGTGCTCAAC	.	RBP	GAPDH	HNRNPK,PCBP2	Long RNA	RP5-940J5.9	.	-89.9	0.500848	0.67053	0.598456	T22815	0.024
208	chr12	7057626	7057742	Y	+	12	286	12.8112	33.6114	28.6047	.	.	.	.	sense	116	agaaggaagggaaggaagaaagaaaaagagaaagaaggaaaaaaaggaaagagcgagaaagaagaaagaaaaggaaggaaggaaagaaagaaaagaaaggaaagaaaaagaaaaag	.	Repeats	A-rich	.	.	.	.	0	0.0436552	0.0437241	0.0497845	No	1
209	chr12	14923656	14923895	N	-	5	93	5.91023	13.7738	9.3092	.	.	.	exon	sense	239	GGGGGCGTCAAGCGCATTTCTGGTCTCATCTACGAGGAGACCCGGGGAGTCCTCAAAGTCTTCCTGGAGAACGTGATCCGTGACGCGGTGACTTACACGGAGCACGCCAAGCGCAAGACCGTCACGGCCATGGATGTGGTGTACGCGCTGAAACGCCAGGGTCGCACCCTTTATGGTTTCGGCGGTTGAGCTGTCCCCACAGCTTCTCTACAGACTCCAAAAGGCCCTTTTCAGGGCCC	.	Long RNA	HIST4H4	.	.	.	.	-92.8	0	0	0	T9218	0.041
210	chr12	15095018	15095581	Y	-	7	131	7.82317	17.781	13.1451	.	.	.	exon	sense	563	GAGGCTCCCAAGGGCATGCTGGCGCGAGGCACGTACCACAACAAGTCCTTCTTCACCGACGATGACAAGCAAGACCACCTCAGCTGGGAGTGGAACCTGTCGATTAAGAAGGAGTGGACAGAATGAATGCATCCACCCCTTTCCCCACCCTTGCCACCTGGAAGAATTCTCTCAGGCGTGTTCAGCACCCTGTCCCTCCTCCCTGTCCACAGCTGGGTCCCTCTTCAACACTGCCACATTTCCTTATTGATGCATCTTTTCCCACCCTGTCACTCAACGTGGTCCCTAGAACAAGAGGCTTAAAACCGGGCTTTCACCCAACCTGCTCCCTCTGATCCTCCATCAGGGCCAGATCTTCCACGTCTCCATCTCAGTACACAATCATTTAATATTTCCCTG…	.	RBP	ARHGDIB	HNRNPK	.	.	.	-132	0.246444	0.256943	0.26433	No	0.673
211	chr12	15103525	15103655	Y	-	6	118	6.89609	16.4617	11.8784	.	.	.	exon	sense	130	TAGATCAGAATGACTGAAAAAGCCCCAGAGCCACATGTGGAGGAGGATGATGATGATGAGCTGGACAGCAAGCTCAATTATAAGCCTCCACCACAGAAGTCCCTGAAAGAGCTGCAGGAAATGGACAAAG	.	Long RNA	ARHGDIB	.	.	.	.	-34.7	0.526492	0.643385	0.812669	No	0.004
212	chr12	26586436	26586642	Y	-	9	204	9.8677	25.2916	20.4614	.	.	.	.	sense	206	gccttattcatttcttggtcccttaactggactgtgaactctctgaggacaaggacaagtttactaatctttgtatTTTTTAAAATACAAAGATTGTAAAATCTTTATATTTAACAGTGCGGCACTCCATCAACAGTTAAGTTGAAGGAATTGAAATCACCATGAAGAACTCATTTTCTTTAACACAAAGCACTTGATGGAAAAAA	.	Repeats	L2c	.	.	.	.	-53.1	0.206087	0.200597	0.210796	No	0
213	chr12	49521574	49521966	Y	-	5	83	5.86738	12.7408	8.31952	.	.	.	exon	sense	392	GCTGAGCAACACCACAGCCATTGCTGAGGCCTGGGCTCGCCTGGACCACAAGTTTGACCTGATGTATGCCAAGCGTGCCTTTGTTCACTGGTACGTGGGTGAGGGGATGGAGGAAGGCGAGTTTTCAGAGGCCCGTGAAGATATGGCTGCCCTTGAGAAGGATTATGAGGAGGTTGGTGTGGATTCTGTTGAAGGAGAGGGTGAGGAAGAAGGAGAGGAATACTAATTATCCATTCCTTTTGGCCCTGCAGCATGTCATGCTCCCAGAATTTCAGCTTCAGCTTAACTGACAGACGTTAAAGCTTTCTGGTTAGATTGTTTTCACTTGGTGATCATGTCTTTTCCATGTGTACCTGTAATATTTTTCCATCATATCTCAAAGTAAAGTCATT	.	RBP	TUBA1B	SBDS	Long RNA	RP11-386G11.10	.	-111.3	0.756242	0.666827	0.698398	No	0.745
214	chr12	49523092	49523169	Y	-	5	93	5.91093	13.7945	9.31524	.	.	.	exon	sense	77	AGTTCGCACTGGCACCTACCGCCAGCTCTTCCACCCTGAGCAGCTCATCACAGGCAAGGAAGATGCTGCCAATAACT	.	RBP	TUBA1B	DDX6	Long RNA	RP11-386G11.10	.	-18.9	0.982442	0.999532	0.999766	No	0.07
215	chr12	56511268	56511426	Y	+	9	194	9.83349	24.2792	19.4448	.	.	.	exon	sense	158	GAAGCGCAAAAGAAGAAAGATGAGGCAGAGGTCCAAGTAAACCGCTAGCTTGTTGCACCGTGGAGGCCACAGGAGCAGAAACATGGAATGCCAGACGCTGGGGATGCTGGTACAAGTTGTGGGACTGCATGCTACTGTCTAGAGCTTGTCTCAATGGA	.	RBP	RPL41	DDX55,DDX6	.	.	.	-38.5	0.510082	0.363956	0.376076	T30525,T25626,T30543,T31061,T9363,T30554	0.619
216	chr12	56555189	56555326	Y	+	7	141	7.86679	18.7823	14.1002	.	.	.	exon	sense	137	GAATGGCTGAGGACCTTCCCAGTCTCCCCAGAGTCCGTGCCTTTCCCTGTGTGAATTTTGTATCTAGCCTAAAGTTTCCCTAGGCTTTCTTGTCTCAGCAACTTTCCCATCTTGTCTCTCTTGGATGATGTTTGCCG	.	RBP	MYL6	DROSHA	.	.	.	-25.7	0.499847	0.361854	0.328365	No	0.703
217	chr12	57081848	57081961	Y	-	5	95	5.92062	14.0983	9.58091	.	.	.	exon	sense	113	TGCATTCTGGGGCCCGAGGTCGAGCCCGCCGCTGCCGCCGTCGCCTGAGGGAAGCGAGAAGAGGCCGCGACCGGAGAGAAAAAGCGGAGTCGCCACCGGAGAGAAGTCGACTC	.	RBP	PTGES3	GNL3	.	.	.	-32.6	0.620735	0.902743	0.875159	No	0.991
218	chr12	57106581	57106689	Y	-	7	138	7.8546	18.4731	13.8243	.	.	.	exon	sense	108	GATGAAACAGGTGTAGAAGTTAAGGACATTGAATTGGTCATGTCACAAGCAAATGTGTCGAGAGCAAAGGCAGTCCGAGCCCTGAAGAACAACAGTAATGATATTGTA	.	RBP	NACA	XRCC6	.	.	.	-21.6	0.856204	0.999241	0.997556	No	0.107
219	chr12	57108157	57108467	Y	-	10	226	10.8304	27.4636	22.601	.	.	.	exon	sense	310	TGGAACAGAATCTGACAGTGATGAATCAGTACCAGAGCTTGAAGAACAGGATTCCACCCAGGCAACCACACAACAAGCCCAGGTGGGTATTCTCTTACTAACTGGTATTGGGTCAAAGAAGCAGGGTTGATCAGGGCAACTTTTGTATTTGGAACTGTGAACCTTCATAAAGGAAAACCCACAAGGAGATTGTGCTATCCAGATCTTAGATTCTGGTTAACTAATAGCTGTTTTATCTTCTTAGCTGGCGGCAGCAGCTGAAATTGATGAAGAACCAGTCAGTAAAGCAAAACAGAGTCGGAGTGAAAAG	.	RBP	NACA	PRPF8	.	.	.	-81.4	0.540297	0.499965	0.499648	T8982	0.038
220	chr12	63359123	63359473	Y	+	10	227	10.8376	27.6748	22.7709	.	.	.	pseudogene	sense	350	TGGAGGTTGGCCGGGTGGCCTATGTCTCCTTTGGACCTCATGCCGGAAAATTGGTCGCGATTGTAGATGTTATTGATCAGAACAGGGCTTTGGTCGATGGACCTTGCACTCAAGTGAGGAGACAGGCCATGCCTTTCAAGTGCATGCAGCTCACTGATTTCATCCTCAAGTTTCCGCACAGTGCCCGCCAAAAGTATGTCCAACAAGCCTGGCAGAAGGCAGACATCAATACAAAATGGGCAGCCACACGATGGGCCAAGAAGATTGAAGCCAGAGAAAGGAAAGCCAAGATGACAGATTTTGATCGTTTTAAAGTTATGAAGGCAAAGAAAACGAGGAACAGAATAATC	.	Long RNA	RPL14P1	.	.	.	.	-89.9	0.71382	0.864771	0.94086	No	0.699
221	chr12	68042524	68042646	Y	+	6	83	6.6616	12.7808	8.35334	.	.	.	exon	sense	122	gcgcgcgggcccgggagaggCTCCCGAGCCAGGCGGTCTTCGGTCCTCGCAGCGCTTCCAGCTCCCCGCGCCCCTATGTGAGGGAGACGGGGAGGCCCGCGGCGCGCAGGGGAGGGCGAGGC	.	RBP	DYRK2	DDX3X	.	.	.	-62.4	0.34918	0.71868	0.578016	No	0.55
222	chr12	68804885	68804968	Y	-	11	256	11.8219	30.5495	25.6292	.	.	.	.	sense	83	CGAAGAGAGAGAGAGAAAGAAAGAAGAAAAaggaggaggaggaggaagaagaagaggaagaggaaaaggaggagaagAAAAGC	.	Repeats	(TCC)n	.	.	.	.	0	0.0137229	0.000987952	0.0010241	No	1
223	chr12	69747672	69747897	Y	+	6	120	6.90273	16.6652	12.0326	.	.	.	exon	sense	225	TAGGCAAAATACCAGCTGATGAAGGCATCTGATGCCTTCATCTGTTCAGTCATCTCCAAAAACAGTAAAAATAACCACTTTTTGTTGGGCAATATGAAATTTTTAAAGGAGTAGAATACCAAATGATAGAAACAGACTGCCTGAATTGAGAATTTTGATTTCTTAAAGTGTGTTTCTTTCTAAATTGCTGTTCCTTAATTTGATTAATTTAATTCATGTATTATG	.	RBP	LYZ	IGF2BP1	Long RNA	RP11-1143G9.4	.	-45.9	0.118978	0.00265778	0.00330222	No	0.039
224	chr12	90468643	90468763	Y	+	5	41	5.20655	7.81617	4.10747	.	.	.	Intergenic	sense	120	tccttctcttcctcttcctccttctcttcctcctcctccttctcttcctcctcctccttctcttcctcctcctccttctcttcctcctcctccttctcttcctcctcctccttctcttcc	.	Repeats	(TCC)n	.	.	.	.	0	0.03825	0.038075	0.043875	No	1
225	chr12	92539192	92539595	Y	-	9	182	9.77897	23.0271	18.2434	.	.	ALL_AGO|slc11888_chr12|54|5|9|0.56|COORDS=chr12-:91063523	exon	sense	403	TTGAGATCTTCGAATGCTGCGGAGCTGGAGGCGGAGGCAGCTGGGGAGGTCCGAGCGATGTGACCAGGCCGCCATCGCTCGTCTCTTCCTCTCTCCTGCCGCCTCCTGTCTCGAAAATAACTTTTTTAGTCTAAAGAAAGAAAGACAAAAGTAGTCGTCCGCCCCTCACGCCCTCTCTTCCTCTCAGCCTTCCGCCCGGTGAGGAAGCCCGGGGTGGCTGCTCCGCCGTcggggccgcgccgccgagccccagccgccccgggccgcccccgcacgccgcccccATGCATCCCTTCTACACCCGGGCCGCCACCATGATAGGCGAGATCGCCGCCGCCGTGTCCTTCATCTCCAAGTTTCTCCGCACCAAGGGGCTCACGAGCGAGCGACAGCTGCAGA…	.	RBP	BTG1	FXR2	Long RNA	RP11-796E2.4	.	-154.6	0.823896	0.837139	0.824727	No	0.21
226	chr12	93477284	93477450	Y	-	12	234	12.5281	28.3213	23.4343	.	.	.	pseudogene	sense	166	TGAGAGCCAAGTGGAGGAAGAAGCGAATGCGCAGGCTGAAGCGCAAAAGAAGAAAGATGAGGCAGAGGTCCAAGTAAACCGCTAGCTTGTTGCACCGTGGAGGCCACAGGAGCAGAAACATGGAATGCCAGACGCTGGGGATGCTGGTACAAGTTGTGGGACTGCA	.	Long RNA	RPL41P5	.	.	.	.	-37.9	0.509265	0.538181	0.73162	T29428	0.593
227	chr12	94132565	94132633	Y	+	19	485	19.667	53.8186	48.5511	.	.	.	.	sense	68	Tagaaagaaaaagagaagagagagagggaaggagaaagaaagaaggaaagagagggagagagagaaac	.	Repeats	A-rich	.	.	.	.	0	0.0319412	0.00126471	0.00170588	No	1
228	chr12	104659050	104659401	Y	+	7	110	7.6751	15.6085	11.0424	.	.	.	pseudogene	sense	351	CCTTTTGCGGGTGGCGGCGAACGCGGAGAGCACGCCATGAAGGCCTCGGGCACGCTACGAGAGTACAAGGTAGTGGGTCGCTGCCTGCCCACCCCCAAATGCCACACGCCGCCCCTCTACCGCATGCGAATCTTTGCGCCTAATCATGTCGTCGCCAAGTCCCGCTTCTGGTACTTTGTATCTCAGTTAAAGAAGATGAAGAAGTCTTCAGGGGAGATTGTCTACTGTGGGCAGGTGTTTGAGAAGTCCCCCCTGCGGGTGAAGAACTTCAGGATCTGGCTGCGCTATGACTCCCGGAGCGGCACCCACAACATGTACCGGGAATACCGGGACCTGACCACCGCAGGCGCT	.	Long RNA	RP11-818F20.1	.	Long RNA	RP11-818F20.5	.	-117.7	0.427906	0.494274	0.854741	T21610	0.891
229	chr12	104659491	104659669	Y	+	9	189	9.81372	23.7839	18.9679	.	.	.	intron	sense	178	AAGTGCCGCCGGCCGGCTGTCAAGCAGTTCCACGACTCCAAGATCAAGTTCCCGCTGCCCCACCGGGTCCTGCGCCGTCAGCACAAGCCACGCTTCACCACCAAGAGGCCCAACACCTTCTTCTAGGTGCAGGGCCCTCGTCCGGGTGTGCCCCAAATAAACTCAGGAACGCCCCGGT	.	RBP	TXNRD1	TIA1	Long RNA	RP11-818F20.5	.	-56.7	0.466753	0.528337	0.688444	T21610	0.169
230	chr12	110898769	110898865	N	+	8	141	8.70519	18.8052	14.1168	.	.	.	pseudogene	sense	96	CTTTCCAACTTGGACCCAGCAGAATGGCTCCTGCAAAGAAGGGTGGCGAGAAGAAAAAGGGCCATTCTGCCATCAACGAAGTGGTAACCCGAGAAT	.	Long RNA	RPL31P49	.	Long RNA	GPN3	.	-25.6	0	0	0	No	0.072
231	chr12	112843012	112843174	Y	-	5	93	5.91299	13.8564	9.37471	.	.	.	exon	sense	162	GAGATTACGGAGCAGCGCAAGATTGATCAGAAAGCTGTGGACTCACAAATTTTACCAAAAATCAAAGCTATTCCTCAGCTCCAGGGCTACCTGCGATCTGTGTTTGCTCTGACGAATGGAATTTATCCTCACAAATTGGTGTTCTAAATGTCTTAAGAACCT	.	RBP	RPL6	HLTF	.	.	.	-38	0.694043	0.702426	0.836315	T215,T17867	0.085
232	chr12	112843676	112843824	Y	-	7	148	7.89416	19.592	14.8933	.	.	ALL_AGO|slc13034_chr12|60|135|188|0.72|COORDS=chr12-:111328132	exon	sense	148	CGAGTTCCTCTACGAAGAACACACCAGAAATTTGTCATTGCCACTTCAACCAAAATCGATATCAGCAATGTAAAAATCCCAAAACATCTTACTGATGCTTACTTCAAGAAGAAGAAGCTGCGGAAGCCCAGACACCAGGAAGGTGAGA	.	RBP	RPL6	IGF2BP1	.	.	.	-24.7	0.822872	0.922669	0.962628	T17867	0.255
233	chr12	112846057	112846434	Y	-	8	172	8.8664	21.963	17.2118	.	.	.	exon	sense	377	AGATACTAAAGAGAAGAAACCCGAAGCCAAGAAGGTTGATGCTGGTGGCAAGGTGAAAAAGGGTAACCTCAAAGCTAAAAAGCCCAAGAAGGGGAAGCCCCATTGCAGCCGCAACCCTGTCCTTGTCAGAGGAATTGGCAGGTATTCCCGATCTGCCATGTATTCCAGAAAGGCCATGTACAAGAGGAAGTACTCAGCCGCTAAATCCAAGGTAAGGGAAGAGGACCACGGACCATTATGTCTTAACCTTAATTGGCATTCTCTTACTGTTGATGCATTTGTGTCCTTGTAGGTTGAAAAGAAAAAGAAGGAGAAGGTTCTCGCAACTGTTACAAAACCAGTTGGTGGTGACAAGAACGGCGGTACCCGGGTGGTTA	.	RBP	RPL6	EFTUD2	.	.	.	-106.7	0.556411	0.546801	0.586313	No	0.046
234	chr12	118683938	118684285	Y	+	26	657	26.3312	71.1175	65.7204	.	.	.	pseudogene	sense	347	TGGGATGGGGAACCGCGGTGGCTTCCGCGGAGGTTTCGGCAGTGGCATCCGGGGCCGGGGTCGCGGCCGTGGACGGGGCCGGGGCCGAGGCCGCGGAGCTCGCGGAGGCAAGGCCGAGGATAAGGAGTGGATGCCCGTCACCAAGTTGGGCCGCTTGGTCAAGGACATGAAGATCAAGTCCCTGGAGGAGATCTATCTCTTCTCCCTGCCCATTAAGGAATCAGAGATCATTGATTTCTTCCTGGGGGCCTCTCTCAAGGATGAGGTTTTGAAGATTATGCCAGTGCAGAAGCAGACCCGTGCCAGCCAGCGCACCAGGTTCAAGGCGTTTGTTGCTATCGGGGACT	.	Long RNA	RPS2P5	.	Long RNA	TAOK3	.	-151.8	0.287821	0.447331	0.984424	T24492	0.017
235	chr12	118684409	118684656	Y	+	14	325	14.7062	37.6155	32.5408	.	.	.	pseudogene	sense	247	CGGCAAGCCCCACACTGTCCCTTGCAAGGTGACAGGCCGCTGCGGCTCTGTGCTGGTGCGCCTCATCCCTGCACCCAGGGGCACTGGCATCGTCTCCGCACCTGTGCCTAAGAAGCTGCTCATGATGGCTGGTATCGATGACTGCTACACCTCAGCCCGGGGCTGCACTGCCACCCTGGGCAACTTCGCCAAGGCCACCTTTGATGCCATTTCTAAGACCTACAGCTACCTGACCCCCGACCTCTGG	.	Long RNA	RPS2P5	.	Long RNA	TAOK3	.	-78.5	0.493162	0.672126	0.999866	No	0.617
236	chr12	120634515	120634733	Y	-	9	153	9.5675	20.0257	15.3243	.	.	ALL_AGO|slc13438_chr12|41|3|8|0.38|COORDS=chr12-:119118918	exon	sense	218	AGGCCTTCTTGGCTGATCCATCTGCCTTTGTGgctgctgcccctgtggctgctgccaccacagctgctcctgctgctgctgcAGCCCCAGCTAAGGTTGAAGCCAAGGAAGAGTCGGAGGAGTCGGACGAGGATATGGGATTTGGTCTCTTTGACTAATCACCAAAAAGCAACCAACTTAGCCAGTTTTATTTGCAAAACAAGGAAATAAAGGCTTAC	.	RBP	RPLP0	SND1	.	.	.	-70.3	0.715	0.80111	0.776917	No	0.028
237	chr12	120636392	120636530	Y	-	18	440	18.62	49.2064	44.0508	.	.	ALL_AGO|slc13442_chr12|44|3|5|0.60|COORDS=chr12-:119120796;ALL_AGO|slc13441_chr12|49|2|10|0.20|COORDS=chr12-:119120763	exon	sense	138	CTGATCAAGACTGGAGACAAAGTGGGAGCCAGCGAAGCCACGCTGCTGAACATGCTCAACATCTCCCCCTTCTCCTTTGGGCTGGTCATCCAGCAGGTGTTCGACAATGGCAGCATCTACAACCCTGAAGTGCTTGAT	.	RBP	RPLP0	DDX24	.	.	.	-38.9	0.965928	0.986949	0.986783	No	0.127
238	chr12	120636665	120636765	Y	-	10	208	10.755	25.6764	20.8449	.	.	.	exon	sense	100	TGAAGTCACTGTGCCAGCCCAGAACACTGGTCTCGGGCCCGAGAAGACCTCCTTTTTCCAGGCTTTAGGTATCACCACTAAAATCTCCAGGGGCACCATT	.	RBP	RPLP0	GRWD1	.	.	.	-21.8	0.97945	0.99505	0.98709	No	0.49
239	chr12	120636922	120636996	Y	-	10	206	10.745	25.4817	20.6509	.	.	.	exon	sense	74	TATCCGGGGGAATGTGGGCTTTGTGTTCACCAAGGAGGACCTCACTGAGATCAGGGACATGTTGCTGGCCAATA	.	RBP	RPLP0	LARP4	.	.	.	-16.3	0.993716	0.998176	0.997122	No	0.823
240	chr12	120637112	120637257	Y	-	9	160	9.63696	20.8145	16.0934	.	.	.	exon	sense	145	TTGTGGGAGCAGACAATGTGGGCTCCAAGCAGATGCAGCAGATCCGCATGTCCCTTCGCGGGAAGGCTGTGGTGCTGATGGGCAAGAACACCATGATGCGCAAGGCCATCCGAGGGCACCTGGAAAACAACCCAGCTCTGGAGAA	.	RBP	RPLP0	PPIG	.	.	.	-45.6	0.989503	0.977538	0.968559	T30719	0.203
241	chr12	120638540	120638634	Y	-	15	346	15.6463	39.6633	34.6037	.	.	.	exon	sense	94	TGACATCGTCTTTAAACCCTGCGTGGCAATCCCTGACGCACCGCCGTGATGCCCAGGGAAGACAGGGCGACCTGGAAGTCCAACTACTTCCTTA	.	RBP	RPLP0	DDX6	.	.	.	-26.5	0.986638	0.999277	0.992883	T30719,T30786	0.167
242	chr12	123196026	123196125	Y	-	18	461	18.7061	51.3636	46.1882	.	.	.	.	sense	99	cggaagggaaggaaaagaaagaaagagagagagaaggaaggaaggaagaaaaggaaagaaagaaagaaggaaagaaaggaagaaagaaagaaagaaaga	.	Repeats	T-rich	.	.	.	.	0	0.0155051	0.0155051	0.0157273	No	1
243	chr12	131130642	131130762	Y	+	7	54	6.423	9.57942	5.43929	.	.	.	.	sense	120	cctccctctccacctccctcaccacctgcctctccacctccctcaccacctgcctctccacctccctcaccacctgcctctccacctccctcaccacttccctctccacctccctctcca	.	Repeats	C-rich	.	.	.	.	0	0.0756417	0.070225	0.07485	No	1
244	chr12	133402287	133402803	N	+	10	189	10.6397	23.7873	18.9679	.	.	ALL_AGO|slc7257_chr12|45|4|10|0.40|COORDS=chr12+:131912559	pseudogene	sense	516	TGGCGGACATTCAGACTGAGCGTGCCTACCAAAAGCAGCCGACCATCTTTCAAAACAAGAAGAGGGTCCTGCTGGGAGAAACTGGCAAGGAGAAGCTCCTGCGGTACTACAAGAACATTGGTCTGGGCTTCAAGACACCCAAAGAGGCTACTGAGGGCACCTACATTGACAAGAAATGCCCCTTCACTGGTGATGTCTCCATTCGAGGGCGGATCCTCTCTGGCGTGGTGACCAAGATGAAGACGCAGAGGACCACTGTCATCCGCCGAGACTACCTGCACTACATCCGCAAGTACAACCACTTCGAGAAGCACCACAAGAACATGTCTGTACACCTGTTCCCCTGCTTCAGGGACGTCCAGATCGGTGACATCGTCACAGTGGGCGAGTGCCGGCCTT…	.	Long RNA	RPS11P5	.	RBP	CHFR	HNRNPM	-167.2	0	0	0	No	0.083
245	chr13	21045930	21045999	Y	-	11	253	11.8127	30.2852	25.3734	.	.	.	.	sense	69	tgaaagaaaGGaagagagagagagaaaaagagagagagagggaaagaaagagagaaagaaagaaagaaa	.	Repeats	T-rich	.	.	.	.	0	0.0275942	0.0276812	0.0293623	No	1
246	chr13	25562725	25562918	N	-	5	93	5.91093	13.7945	9.31524	.	.	.	pseudogene	sense	193	GCCCAGGCAGACTTTGAGGGGTTCGTGCTGTAAGACCTAAAGTTCTTAGGAGATTGTCCAAAACAAAGAAACATGTCCGCAGGGCCTGTAGTGGTTCCATGCGTACTAAATGTGTTCGTGACGGGATCAAGCGTGCTTTCCTTATCGAGGAGCAGAAAATCGTTGTGAAAGTGTTGAAGGCACAAGCACAGAG	.	Long RNA	RP11-756A22.5	.	.	.	.	-45.5	0	0	0	No	0.917
247	chr13	25671003	25671140	N	+	7	135	7.84329	18.2084	13.5479	.	.	.	exon	sense	137	TGACCGATGAAAGTGGAAAATCCAAAGGATTTGGATTTGTAAGCTTTGAAAGGCATGAAGATGCACAGAAAGCTGTAGATGAGATGAATGGAAAGGAGCTCAATGGAAAACAAATTTACGTTGGTCGAGCTCAGAAA	.	Long RNA	PABPC3	.	.	.	.	-30.9	0	0	0	No	0.001
248	chr13	27549628	27549707	N	-	9	182	9.77897	23.0271	18.2434	.	.	.	pseudogene	sense	79	ATTTCATTCTCTGATTGGCCAAAGCCAACAGCATCACCTCAAAAAGAACTTTTGACTGGAGAGAATCATGGATGTGGAA	.	Long RNA	RP11-545M8.4	.	.	.	.	-14.4	0	0	0	No	0.22
249	chr13	32531792	32531887	Y	+	5	94	5.91663	13.9689	9.44617	.	.	.	.	sense	95	gggaaggggaaggggaagggagagagagagaaggaaggaaggagaaagaaaagaaagagaaagaaaagaaaagaaggaagaagaggaaggaggag	.	Repeats	GA-rich	.	.	.	.	0	0.0135368	0.00673684	0.00712632	No	1
250	chr13	32616297	32616356	Y	+	24	597	24.3807	65.0808	59.7292	.	.	.	.	sense	59	TGAaaagaagaaaggaagaagggaggaagggagggaaggagggaagaaaggaaAAGAAT	.	Repeats	GA-rich	.	.	.	.	0	0.0154237	0.00105085	0.00120339	No	1
251	chr13	42802735	42802817	Y	+	5	90	5.9001	13.4913	9.01445	.	.	.	.	sense	82	TTgagagagagagagagagagggagagagagaagaaaaagaaagaaaagaaagaaagaagaaagggagagaaagaaagagaa	.	Repeats	A-rich	.	.	.	.	0	0.00295122	0.000487805	0.000560976	No	1
252	chr13	45010752	45010989	Y	-	9	204	9.8677	25.2916	20.4614	.	.	.	exon	sense	237	GAGCTGAGTGGAGCCCGGCTGCGGATCTGGGAAGCGCCTCTTCACGGCACTGGGATCCGCATCTGCCTGGGATCATCAAGCCCTAGAAGCTGGGTTTCTTTAAATTAGGGCTGCCGTTTTCTGTTTCTCCCTGGGCTGCGGAAAGCCAGAAGATTTTATCTAGCTTATACAAGGCTGCTGGTGTTCCCTCTTTTTTTCCACGAGGGTGTTTTTGGCTGCAATTGCATGAAATCCCAA	.	RBP	TSC22D1	FTO	.	.	.	-78.9	0.355481	0.413797	0.42835	T2067	0.115
253	chr13	45911241	45911513	Y	-	17	404	17.6072	45.5429	40.4177	.	.	ALL_AGO|slc4722_chr13|40|4|13|0.31|COORDS=chr13-:44809496	exon	sense	272	GGCAATTATTTTGGATCTATCACCTGTCATCATAACTGGCTTCTGCTTGTCATCCACACAACACCAGGACTTAAGACAAATGGGACTGATGTCATCTTGAGCTCTTCATTTATTTTGACTGTGATTTATTTGGAGTGGAGGCATTGTTTTTAAGAAAAACATGTCATGTAGGTTGTCTAAAAATAAAATGCATTTAAACTCATTTGAGAGAATGCCTTTTAGTTTAATGCATATTTAAACTAAATTGATCCTGTAGTGTTCCTGGAGAAGCT	.	RBP	TPT1	HLTF	.	.	.	-53.6	0.819471	0.835206	0.810724	T24009,T37045,T28542,T24639,T12949,T12948,T12945	0.548
254	chr13	45912794	45912892	Y	-	9	204	9.8677	25.2916	20.4614	.	.	.	exon	sense	98	TGAATCCAGATGGCATGGTTGCTCTATTGGACTACCGTGAGGATGGTGTGACCCCATATATGATTTTCTTTAAGGATGGTTTAGAAATGGAAAAATGT	.	RBP	TPT1	IGF2BP2	.	.	.	-18.8	0.985765	0.995265	0.986653	T24009,T28542,T24639,T12949,T12948,T12945	0.542
255	chr13	45914130	45914321	Y	-	44	1305	44.2646	136.165	130.521	.	.	.	exon	sense	191	AGATGGTCAGTAGGACAGAAGGTAACATTGATGACTCGCTCATTGGTGGAAATGCCTCCGCTGAAGGCCCCGAGGGCGAAGGTACCGAAAGCACAGTAATCACTGGTGTCGATATTGTCATGAACCATCACCTGCAGGAAACAAGTTTCACAAAAGAAGCCTACAAGAAGTACATCAAAGATTACATGAAA	.	RBP	TPT1	SRSF7	Long RNA	RP11-290D2.6	.	-41.5	0.983262	0.98033	0.95122	T12949,T12945,T37043,T19712,T28714	0.219
256	chr13	45915194	45915320	Y	-	11	256	11.8219	30.5495	25.6292	.	.	ALL_AGO|slc4729_chr13|75|7|34|0.21|COORDS=chr13-:44813175	exon	sense	126	GCCTTTTCCGCCCGCTCCCCCCTCCCCCCGAGCGCCGCTCCGGCTGCACCGCGCTCGCTCCGAGTTTCAGGCTCGTGCTAAGCTAGCGCCGTCGTCGTCTCCCTTCAGTCGCCATCATGATTATCT	.	RBP	TPT1	IGF2BP3	Long RNA	RP11-290D2.6	.	-29	0.785706	0.687103	0.708952	T37043,T28714	0.594
257	chr13	46701619	46701830	Y	-	5	88	5.8937	13.3271	8.88712	.	.	.	exon	sense	211	GGAGCAAGAGTGTATGCCCTGCCAGAAGACCTGGTTGAAGTGAACCCCAAAATGGTCATGACCGTGTTTGCCTGCCTCATGGGGAAAGGAATGAAGAGGGTGTGAGGCCCAATGGGGCTGGGTGGGAGGCGGTGCACTCACTCCTGACTGCCCGGCACAGATGCTCCAGGGATGATTCAAGCCATTCCAAAGTTCAACTTGGTGACACTCT	.	RBP	LCP1	LARP4	.	.	.	-69.7	0.571071	0.470393	0.482716	No	0.163
258	chr13	48807296	48807610	Y	+	6	94	6.77071	14.007	9.47571	.	.	.	exon	sense	314	CTCCGCCCTCGCGCGGGAGCTGGGAGGCTGCGAGATCCCTACCGCAGTAGCCGCCTCTGCCGCCGCGGAGCTTCCCGAACCTCTTCAGCCGCCCGGAGCCGCTCCCGGAGCCCGGCCGTAGAGGCTGCAATCGCAGCCGGGAGCCCGCAGCCCGCGCCCCGAGCCCGCCGCCGCCCTTCGAGGGCGCCCCAGGCCGCGCCATGGTGAAGGTGACGTTCAACTCCGCTCTGGCCCAGAAGGAGGCCAAGAAGGACGAGCCCAAGAGCGGCGAGGAGGCGCTCATCATCCCCCCCGACGCCGTCGCGGTGGACTGC	.	RBP	ITM2B	AUH	.	.	.	-139	0.61686	0.604347	0.492331	T12851	0.909
259	chr13	50530601	50530712	Y	-	9	153	9.5675	20.0257	15.3243	.	.	.	Intergenic	sense	111	tggaagaggagaaggaggagaaggagagggagaaggagaggaaagaagaaagaagaagaaagaggaaggaaggaggaggagggaagaggaggagaaggaagaaggagaaga	.	Repeats	CT-rich	.	.	.	.	0	0.0202973	0.0202252	0.0217297	No	1
260	chr13	55014810	55015136	Y	-	42	1247	42.3368	130.407	124.779	.	.	.	pseudogene	sense	326	TGACGGCATCCCACCGCCCTACGACAAGAAAAAGCGGATGGTGGTTCCTGCTGCCCTCAAGGTCGTGCGTCTGAAGCCTACAAGAAAGTTTGCCTATCTGGGGCGCCTGGCTCATGAGGTTGGCTGGAAGTACCAGGCAGTGACAGCCACCCTGGAGGAGAAGAGGAAAGAGAAAGCCAAGATCCACTACCGGAAGAAGAAACAGCTCATGAGGCTACGGAAACAGGCCGAGAAGAACGTGGAGAAGAAAATTGACAAATACACAGAGGTCCTCAAGACCCACGGACTCCTGGTCTGAGCCCAATAAAGACTGTTAATTCCTCAAA	.	Long RNA	RP11-365K22.1	.	.	.	.	-89.5	0.524825	0.566396	0.978552	T23945	0.407
261	chr13	57262618	57262682	N	+	19	501	19.7221	55.4132	50.1308	.	.	.	Intergenic	unannotated	64	TTGTTCAAGGGAATAAGTTACTCTAGGGATAACAGCACAATCCTATTCTAGAGTCCATATCGAC	.	Unannotated	.	.	Unannotated	.	.	-12.2	0	0	0	No	0.106
262	chr13	72249467	72249643	Y	+	5	94	5.91663	13.9689	9.44617	.	.	.	pseudogene	sense	176	TGCTTTGCAGGAGGCAAGTGAGGCCTATCTGGTTGGCCTTTTTGAAGACACCAACCTGTGTGCTATCCATGCCAAACGTGTAACAATTATGCCAAAAGACATCCAGCTAGCACGCCGCATACGTGGAGAACGTGCTTAAGAATCCACTATGATGGGAAACATTTCATTCTCaaaaa	.	Long RNA	RP11-393H6.2	.	Long RNA	DACH1	.	-38.8	0.0967216	0.908307	0.923318	No	0.33
263	chr13	76100571	76100748	Y	-	5	95	5.92062	14.0983	9.58091	.	.	ALL_AGO|slc5730_chr13|64|3|13|0.23|COORDS=chr13-:74998633	exon	sense	177	GCTGCAGTTATTGAAACGGTGTGAAGACGGATTCTTTGGTTGATAAATTGCTATCATTCTAAAGTCATGGACTTCACTTTCGGCAACAAAACTAAATAAGGATGGAACATTTATTGAATGAAAAATGCACTTTTGTTTTTCCatttttttaaataataaaaatCAGACAAACAggaa	.	RBP	COMMD6	LARP4	.	.	.	-29	0.180944	0.158972	0.176915	No	0.477
264	chr13	82264269	82264555	Y	+	18	470	18.736	52.2611	47.0108	.	.	.	.	sense	286	TTGTGGAAGAGGCAGAAAATGGAAGAGACGCCCCTGCTAACGGGAATGCTAATGAGGAAAATGGGGAGCAGGAAGCTGACAGTgaagtagatgaagaagaggaagaaggtggggaggaagaggaggaggaagaagaaggtgatggtgaggaagaggatggagatgaagatgaggaagCTGAGTCACCTACGGGCAAGCGGGCAGCTGAAGATGATGAGGATGACGATGTCGATACCAAGAAGCAGAAGACCGACGAGGATGACTAGACAGCAAAAAAGGAAAAGTT	.	Repeats	GA-rich	.	.	.	.	-35.1	0.168948	0.756661	0.832857	No	0.502
265	chr13	99725560	99725660	Y	-	21	493	21.3564	54.5231	49.3096	.	.	.	intron	sense	100	atgaaagagagagagagagaggagagagagagagaggagagagagaaaagaagaagaagagaggagagaaagaagagagagaagagagagagagagagaa	.	RBP	DOCK9	UCHL5	.	.	.	0	0.13023	0.1289	0.14298	No	1
266	chr13	101104070	101104147	Y	+	5	40	5.16858	7.67843	4.02845	.	.	.	.	sense	77	tctctctcctcttcctctcctctctctcctctctctcctcttcctctcctctctctcctcttcctctcctctctctc	.	Repeats	CT-rich	.	.	.	.	0	0.01	0.01	0.01	No	1
267	chr13	104881017	104881140	Y	-	22	601	22.6957	65.4892	60.1704	.	.	.	Intergenic	sense	123	TTggccgggcgcggtggctcacgcctgtaatcccagctctcagggaggctaagaggcgggaggatagcttgagcccaggagttcgagacctgcctgggcaatatagcaagaccccgttctcca	.	Repeats	FLAM_C	.	.	.	.	-46.7	0.0134309	0.238049	0.245528	No	0.102
268	chr14	21662955	21663040	Y	-	10	233	10.8545	28.2057	23.3212	.	.	.	Intergenic	sense	85	TGAAAGagaaagaaagaagaaagagaaagaagagaagaaggaaggaaggagaaagagaaaaagaaaagaaggaaggaaggaaaaa	.	Repeats	T-rich	.	.	.	.	0	0.273388	0.273412	0.277871	No	1
269	chr14	35037897	35037998	N	-	6	121	6.90739	16.8161	12.1984	.	.	ALL_AGO|slc4636_chr19|50|1|10|0.10|COORDS=chr19+:47065607	intron	sense	101	TGGTGGAAAAGGACCAAGATGGGGGCCGCAAACTGACACGTCAGGGACAGAGAGATCTGGACAGAATCGCTGGACAGGTGGCAGTTGCCAACAAGAAGCAT	.	RBP	SNX6	TAF15	.	.	.	-25.5	0	0	0	No	0.129
270	chr14	50050290	50050380	Y	-	18	474	18.7486	52.6711	47.4706	.	.	.	exon	sense	90	TCTTCCTTCAGAGGATTATCCGGGGCATCTACTCAATGAAAAACCATGATAATTCTTTGTATATAAAATAAACATTTGAAAAAACCCTTC	.	RBP	RPS29	SND1	.	.	.	-15.4	0.0375778	0.1608	0.184133	T1215,T31472	0.016
271	chr14	50052670	50053094	Y	-	17	380	17.4734	43.1949	38.0946	.	.	.	exon	sense	424	CTTTTACCTCGTTGCACTGCTGAGAGCAAGATGGGTCACCAGCAGCTGTACTGGAGCCACCCGCGAAAATTCGGCCAGGGTTCTCGCTCTTGGTGAGAAATAGTTTGTGATTTTGGGGAAGCGTTGCCGTGGAGCGCTAGGCTGCTTAAAATCTCAAGTAGAGGAGGCCACGGGCGGCACGAGGGAGCACGCCGACTGGGAGTCGCTGGTGCCGCCATTACAGGCCTGTACTGTGGCTTGGGAGTCCCGGGATGCGGGTAGTAGCCGTCTGAGTGCGGAGTCTTGTAATTTCTATGACCTGCAAAACCGCTGTCTCTTTTCTTACAGTCGTGTCTGTTCAAACCGGCACGGTCTGATCCGGAAATATGGCCTCAATATGTGCCGCCAGTGTTTCCGTCA…	.	RBP	RPS29	DDX24	.	.	.	-146.7	0.383403	0.432094	0.424443	T1215,T31472,T14819	0.554
272	chr14	50052918	50053094	Y	+	5	80	5.85138	12.4379	8.01899	.	.	.	exon	antisense	176	CGCCCGTGGCCTCCTCTACTTGAGATTTTAAGCAGCCTAGCGCTCCACGGCAACGCTTCCCCAAAATCACAAACTATTTCTCACCAAGAGCGAGAACCCTGGCCGAATTTTCGCGGGTGGCTCCAGTACAGCTGCTGGTGACCCATCTTGCTCTCAGCAGTGCAACGAGGTAAAAG	.	Antisense	.	.	RBP	RPS29	DDX24	-44	0.425	0.46	0.427932	No	0.47
273	chr14	56233236	56233306	Y	+	6	106	6.84611	15.2486	10.6924	.	.	.	pseudogene	sense	70	TAAGAAAAAGCGGATGGTGGTTCCTGCTGCCCTCAAGGTCGTGCGTCTGAAGCCTACAAGAAAGTTTGCC	.	Long RNA	RPL13AP3	.	.	.	.	-11.8	0.279786	0.276129	0.999543	No	0.953
274	chr14	57742116	57742202	Y	+	19	406	19.1878	45.8703	40.687	.	.	.	.	sense	86	ggtgggggggggagagagagaggagagagagagagagagaagagagaagagagagaagagagaagagaaaagagagaggagagaga	.	Repeats	MLT1F1	.	.	.	.	0	0.0606628	0.133674	0.152186	No	1
275	chr14	59261423	59261788	N	+	8	151	8.77707	19.9263	15.1964	.	.	.	pseudogene	sense	365	GAAGTGGTAACCCGAGAATATACCATCAACATTCACAAGCGCATCCATGGAGTGGGCTTCAAGAAACGTGCACCTTGGGCACTCAAAGAGATTCGGAAATTTGCCATGAAGGAGATGGGAACTCCAGATGTGCGCATTGACACCAGGCTCAACAAAGCTGTCTGGGCCAAAGGAATAAGGAATGTCCTATACCGAATCCATGTGAGGCTGTCCAGAAAACGTAATGAGGATGAAGATTCACCAAATAAGCTATATACTTTGGTTACCTATGTAACTGTTACCACTTTCAAAAATCTACAGACAGTCAATGTGGATGAGAACTAATCCCTGATCGTCAGATACATCAAATAAAGTTATAAAATTGC	.	Long RNA	RP11-112J1.1	.	.	.	.	-85.4	0	0	0	No	0.097
276	chr14	60864544	60864668	Y	+	5	80	5.85138	12.4379	8.01899	.	.	.	pseudogene	sense	124	GCATTCACAAACTGAAAGAAAAAGCGAAGAAACAGAAGGGTCGCGGCTTTGGCTCCGAAGAGGGGTCCCGAGCGCGGATGCGTGAGGATTATGACAGCGTGGAGCAGGATGGCGATGAACCCGG	.	Long RNA	CTD-2568P8.3	.	Long RNA	C14orf39	.	-30.1	0.0438871	0.560403	0.973016	No	0.359
277	chr14	65541844	65542370	N	-	6	115	6.884	16.1226	11.5576	.	.	.	exon	sense	526	TTGATATTTATTTCCTGCTACTTAAATTTGAATCTGAGTGAATTGTACCTATTTCTGATGATGTCGGTCTTGCAAAGCGACAGATTCATAAAGTAATGATGAAATCTTTCTTTCTTCCCGTGTGTATTTCTAAGAAATAGAGCCAACTGATTTTGTATGTAAATACCAAGAGCAATTTACCTGGTACTAAACCCGCACCCCAGTGCGGACCCTTCCCAGCCCTCATCCCACTTCCTTTCCTACTGTCCTGGAACCTGTCTCCATTGTGTGATCCAGCCCTGGTTCTGGCTGTGGTCAGCAGATGCCAGTGAAGGGTTTTGTGTGTTTAGGCCTCATTTCTTTGTCTTTTTCCTACTCCGTTCCTGGCATTTGCTGATTTCTAGTGTATACTCTGTAGTC…	.	RBP	MAX	DDX6	.	.	.	-118.8	0	0	0	No	0.156
278	chr14	70352624	70352856	Y	-	13	306	13.7648	35.6898	30.6888	.	.	.	pseudogene	sense	232	TGCCGAAAGGAAAGAAGGCCAAGGGAAAGAAGGTGGCTCCGGCCCCAGCTGTCGTGAAGAAGCAGGAGGCTAAGAAAGTGGTGAATCCCCTGTTTGAGAAAAGGCCTAAGAATTTTGGCATTGGACAGGACATCCAGCCCAAAAGAGACCTCACCCGCTTTGTGAAATGGCCCCGCTATATCAGGTTGCAGCGGCAGAGAGCCATCCTCTATAAGCGGCTGAAAGTGCCTCC	.	Long RNA	RP11-880O3.1	.	RBP	SMOC1	SUGP2	-65	0.797711	0.579599	0.989565	No	0.233
279	chr14	71389030	71389208	Y	+	41	1232	41.4164	128.898	123.227	.	.	.	intron	sense	178	TCTTTAATAGGTATTAGACAAAAACATGAATTTTTTTCTTGCAAACCTTTAATAGGTATTAGATGAAAACATGAATTTTTTTACAAACCTTTAATAGGGGAGAATTTTATAGCATGGAGAAAACCGGTAAATGTGAATACTATATATTTTAAGGTTATATAATAAAAATAGGGGAAAT	.	Long RNA	PCNX1	.	.	.	.	-20.7	0.199753	0.024691	0.0330843	No	0.91
280	chr14	71461625	71461751	Y	+	32	924	32.5415	98.0296	92.4839	.	.	.	intron	sense	126	TGTATCAAACTTAGGCCTAATATCCTTTGAGAAATTACTAGTTTCCCAATTATTTTAAAGATTTTCTAAAATGATGGATCCATGTAAATGAGACTGGAATATGGTTTGGAAGAAGAAATAACAAAA	.	Long RNA	PCNX1	.	.	.	.	-15.4	0.0261746	0.101365	0.0505873	No	0.711
281	chr14	90863372	90863550	Y	+	6	115	6.88344	16.1078	11.5162	.	.	ALL_AGO|slc2954_chr14|44|8|11|0.73|COORDS=chr14+:89933297	exon	sense	178	GGCAGTGGTGCTGGGAGTGTCGTGGACGCCGTGCCGTTACTCGTAGTCAGGCGGCGGCGCAGGCGGCGGCGGCGGCATAGCGCACAGCGCGCCTTagcagcagcagcagcagcagcggcaTCGGAGGTACCCCCGCCGTCGCAGCCCCCGCGCTGGTGCAGCCACCCTCGCTCCCTCT	.	RBP	CALM1	GRWD1	.	.	.	-84.3	0.172292	0.406764	0.245601	No	0.675
282	chr14	91233022	91233109	N	+	5	72	5.80346	11.6914	7.29648	.	.	.	pseudogene	sense	87	TTGACTGCACCAAGAGGGCGGGAGAACTCACTGAGGATGAGGTGGAACGTGTGATCACCATTATGCAGAATCCATGCCAGTACAAGA	.	RBP	CTD-3035D6.1	YBX3	Long RNA	TTC7B	.	-18.1	0	0	0	No	0.326
283	chr14	92906494	92906604	Y	-	6	92	6.74587	13.6847	9.22636	.	.	.	intron	antisense	110	TGTGGGGTAAGGGGAGGCCTTTGCACACGTTTGCCAGGTCACCGCTTGGGGGGCCCAGGTCCAAAGCAGCCAGTCCCAATTCTGCAAGGACACTGAGCTCCCCAAGCTGG	.	Antisense	.	.	Long RNA	SLC24A4	.	-49.6	0.00575455	0.00242727	0.00243636	No	0.003
284	chr14	94847230	94847499	Y	-	40	940	38.6692	99.5646	94.0467	.	.	.	exon	sense	269	CCCACCTTCCCCTCTCTCCAGGCAAATGGGAGAGACCCTTTGAAGTCAAGGACACCGAGGAAGAGGACTTCCACGTGGACCAGGTGACCACCGTGAAGGTGCCTATGATGAAGCGTTTAGGCATGTTTAACATCCAGCACTGTAAGAAGCTGTCCAGCTGGGTGCTGCTGATGAAATACCTGGGCAATGCCACCGCCATCTTCTTCCTGCCTGATGAGGGGAAACTACAGCACCTGGAAAATGAACTCACCCACGATATCATCACCAAG	.	RBP	SERPINA1	TROVE2	.	.	.	-82.4	0.134862	0.338401	0.420621	No	0.057
285	chr14	95057305	95057542	N	-	16	167	12.1488	21.4924	16.7624	.	.	.	intron	sense	237	tggagtggaggagtagagtggagtggatgagaggagtggaggagtggaatggagtggaatggaatagagtgaactggagtggagtggagtggagtggaactgaatagagtgaactggagtggagtggagtggaattgaataaagtgaactggagtggagtggagtggaattgaatagagtgaactggagtggagtggagtggagtggagttgagtggaatggaatggaatgaaatgg	.	Repeats	(CACTC)n	.	.	.	.	-8.8	0	0	0	No	0.776
286	chr14	95057654	95057843	N	-	11	150	10.7089	19.7541	15.0552	.	.	.	intron	sense	189	tggaatggagtggaggggagaggagtggaatagaatagtagagagtggagtggagttgactgcaatggaatggaatagaatagagtagaatggaatggaatagaatagaatagagtggagtggagtggaggagtggaatggagtggagtggaagagtggagtggaggagtggaatggagtggaatggaa	.	Repeats	(CACTC)n	.	.	.	.	-3.6	0	0	0	No	0.488
287	chr14	96180293	96180430	Y	-	6	92	6.74587	13.6847	9.22636	.	.	.	exon	sense	137	TTGCTTCTTAGGCGGCCCGAGGACGCCATGGCCGAGTGCCCGACACTCGGGGAGGCAGTCACCGACCACCCGGACCGCCTGTGGGCCTGGGAGAAGTTCGTGTATTTGGACGAGAAGCAGCACGCCTGGCTGCCCTT	.	Long RNA	TCL1A	.	Long RNA	RP11-164H13.1	.	-51.4	0.0722993	0.208453	0.215299	No	0.773
288	chr14	99439171	99439632	Y	-	42	1271	42.4161	132.82	127.184	.	.	.	pseudogene	sense	461	GTGGCACGCGCTGGGCAGAAAGGCTACCATCACCGCACTGAGATCAACAAGAAGATCTATAAGATTGGCCAGGGCTACCTTATCAAGGATGGCAAGCTGATCAAGAACAATGCCTCCACTGACTATGACCTATCTGACAAGAGCATCAACCCTCTGGGTGGCTTTGTCCACTATGGTGAAGTGACCAATGACTTTGTCATGCTGAAAGGCTGTGTGGTGGGAACCAAGAAGCGGGTGCTCACCCTCCGCAAGTCCTTGCTGGTGCAGACGAAGCGGCGGGCTCTGGAGAAGATTGACCTTAAGTTCATTGACACCACCTCCAAGTTTGGCCATGGCCGCTTCCAGACCATGGAGGAGAAGAAAGCATTCATGGGACCACTGAAGAAAGACCGAATTGCA…	.	Long RNA	AL162151.1	.	.	.	.	-135.7	0.618388	0.761178	0.939863	T17155	0.451
289	chr14	99439639	99439736	Y	+	17	371	17.4104	42.2847	37.1378	.	.	.	pseudogene	sense	97	TTGATGGCGTGATGTCTCACAGAAAGTTCTCCGCTCCCAGACATGGGTCCCTCGGCTTCCTGCCTCGGAAGCGCAGCAGCAGGCATCGTGGGAAGGT	.	Long RNA	AL162151.3	.	.	.	.	-28.6	0.744155	0.852918	0.989155	No	0.778
290	chr14	102551165	102551302	Y	-	7	145	7.88124	19.1868	14.5188	.	.	.	exon	sense	137	GATGAGGCTgaagaaaaggaagacaaagaagaagaaaaagaaaaagaagagaaagaGTCGGAAGACAAACCTGAAATTGAAGATGTTGGTTCTgatgaggaagaagaaaagaaggatggtgacaagaagaagaagaa	.	RBP	HSP90AA1	SRSF7	.	.	.	-7.5	0.881876	0.887197	0.927372	No	0.051
291	chr14	106208132	106208229	Y	-	15	345	15.6436	39.608	34.5528	.	.	.	intron	sense	97	GTGGGACCCGTGGGGTGCGAGGGCCACATGGACAGAGGCCGGCTCGGCCCACCCTCTGCCCTGAGAGTGACCGCTGTACCAACCTCTGTCCCTACAG	Y	Long RNA	IGHG1	.	.	.	.	-43.3	0.0862165	0.0638041	0.105443	No	0.053
292	chr14	106444632	106444923	Y	-	30	818	30.4224	87.2913	81.8432	.	.	.	pseudogene	sense	291	TCGACAGCACGCCCTACCGACAGTGGTACGAGTCCCACTGTGCACTGCCCCTGGGCCGCAAGAAGGGAGCCAAGCTGACTCCTGAGGAAGAAGAGATTTTAAACAAAAAACGATCTAAAAAAATTCAGAAGAAATATGATGAAAGGAAGAAGAATGCCAAAATGAGCAGTCTCCTGGGGGAGCAGTTCCAGCAGGGCAAGCTTCTTGCGTGCATGGCTTCAAGGCCGGGACAGTGTGGCCGAGCAGATGGCTATGTGCTAGAGGGCAAAGAGTTGGAGTTCTATCTTAGGA	.	Long RNA	AB019441.29	.	.	.	.	-86.9	0.247405	0.776419	0.998405	No	0.025
293	chr15	25154426	25154614	Y	-	7	114	7.70957	16.012	11.4496	.	.	.	pseudogene	sense	188	ATGAAGGCCAAGTGGAGGTGACTGGCGATGAATACATTGTGGAAAGCATTGATGGTCAGCCAAGTGCCTTTACCTGCTATTTGGATGCAGGCCTTGCCAGAACTACCACTGGCAATAAAGTTTTTGGTGCCCTGAAGGGAGCTGTGGATGGAGGCTTGTCTATCCCTCACAGTACCAAACAATTCCCT	.	RBP	RPL5P1	ZNF622	Long RNA	SNRPN	.	-59.5	0.537548	0.954282	0.997755	No	0.037
294	chr15	27018537	27018712	Y	+	17	328	16.9929	37.9204	32.8427	.	.	.	intron	antisense	175	TCGTCCCCTGAGCCGGCTCCTCTGGGCTCTCGGCGGCCGGGCGAGTGCGGGGACTGTCGGCAGCCTCGGCGCCGGCATAAGCGGCGGCGGAAACGCTGCCCGCCTACCCCGGCCGCCGAAGTTGGCCCCGCACGACGACCACCGCCCGCTGCAGCGCAGCCCGAGAGCCCCCGGG	.	Antisense	.	.	Long RNA	GABRB3	.	-96.7	0.0465371	0.0286514	0.0363143	No	0.064
295	chr15	27667198	27667265	Y	+	10	214	10.7845	26.3024	21.4261	.	.	.	intron	sense	67	TCCATGGGAGTGGGCTGCATATCCACCAATACTGAGTGTCCTAAGATATCCATGGGAGTGGGCTGCA	.	Long RNA	GABRG3	.	.	.	.	-15.3	0.0142836	0.0141642	0.790672	No	0.635
296	chr15	44085964	44086245	Y	+	21	508	21.4551	56.1553	50.8676	.	.	.	exon	sense	281	CAAGTAGCTTTGTGGCTTCGTGTCCAACCCTCTTGCCCTTCGCCTGTGTGCCTGGAGCCAGTCCCACCACGCTCGCGTTTCCTCCTGTAGTGCTCACAGGTCCCAGCACCGATGGCATTCCCTTTGCCCTGAGTCTGCAGCGGGTCCCTTTTGTGCTTCCTTCCCCTCAGGTAGCCTCTCTCCCCCTGGGCCACTCCCGGGGGTGAGGGGGTTACCCCTTCCCAGTGTTTTTTATTCCTGTGGGGCTCACCCCAAAGTATTAAAAGTAGCTTTGTAATTCC	.	RBP	SERF2	GRWD1	Long RNA	RP11-296A16.1	.	-91.4	0.997566	0.999886	0.999822	T13423,T7643,T15755,T16510,T15866	0.011
297	chr15	45003710	45003813	Y	+	22	596	22.6804	64.9928	59.6443	.	.	ALL_AGO|slc1040_chr15|46|3|7|0.43|COORDS=chr15+:42791018	exon	sense	103	GGGCATTCCTGAAGCTGACAGCATTCGGGCCGAGATGTCTCGCTCCGTGGCCTTAGCTGTGCTCGCGCTACTCTCTCTTTCTGGCCTGGAGGCTATCCAGCGT	.	RBP	B2M	EIF3D	.	.	.	-32.4	0.0369612	0.058534	0.0693981	T30284,T31879,T31896,T32059,T31732,T31668	0.504
298	chr15	45007620	45007899	Y	+	20	505	20.6088	55.8713	50.5879	.	.	ALL_AGO|slc1043_chr15|44|2|5|0.40|COORDS=chr15+:42795078;ALL_AGO|slc1041_chr15|43|5|15|0.33|COORDS=chr15+:42794905	exon	sense	279	GTACTCCAAAGATTCAGGTTTACTCACGTCATCCAGCAGAGAATGGAAAGTCAAATTTCCTGAATTGCTATGTGTCTGGGTTTCATCCATCCGACATTGAAGTTGACTTACTGAAGAATGGAGAGAGAATTGAAAAAGTGGAGCATTCAGACTTGTCTTTCAGCAAGGACTGGTCTTTCTATCTCTTGTACTACACTGAATTCACCCCCACTGAAAAAGATGAGTATGCCTGCCGTGTGAACCATGTGACTTTGTCACAGCCCAAGATAGTTAAGTGGG	.	RBP	B2M	RPS5	.	.	.	-58.9	0.152559	0.351272	0.452104	T31895,T8403,T30285,T30284,T31879,T31896,T32059,T31732,T31668	0.888
299	chr15	45009802	45010343	Y	+	53	1449	52.2312	150.771	144.999	.	.	ALL_AGO|slc1045_chr15|50|38|110|0.35|COORDS=chr15+:42797156	exon	sense	541	AGGTTTGAAGATGCCGCATTTGGATTGGATGAATTCCAAATTCTGCTTGCTTGCTTTTTAATATTGATATGCTTATACACTTACACTTTATGCACAAAATGTAGGGTTATAATAATGTTAACATGGACATGATCTTCTTTATAATTCTACTTTGAGTGCTGTCTCCATGTTTGATGTATCTGAGCAGGTTGCTCCACAGGTAGCTCTAGGAGGGCTGGCAACTTAGAGGTGGGGAGCAGAGAATTCTCTTATCCAACATCAACATCTTGGTCAGATTTGAACTCTTCAATCTCTTGCACTCAAAGCTTGTTAAGATAGTTAAGCGTGCATAAGTTAACTTCCAATTTACATACTCTGCTTAGAATTTGGGGGAAAATTTAGAAATATAATTGACAGGAT…	.	RBP	B2M	METAP2	.	.	.	-119	0.067525	0.0348041	0.0573715	T8403,T30285,T31814,T37865,T32032,T32059,T31732	0.225
300	chr15	49587336	49587410	Y	+	11	252	11.8112	30.2424	25.2913	.	.	.	.	sense	74	Tgaaggaaagaagaaagagaagaaggaggggaaggagggagaggaagaaggaagaaaggaagggaagaagaaaa	.	Repeats	GA-rich	.	.	.	.	0	0.26523	0.0224459	0.0379595	No	1
301	chr15	60060578	60060891	Y	+	13	282	13.6532	33.2833	28.2785	.	.	.	pseudogene	sense	313	CGAAAGGCGGCAAAAAGGGAGCCAAGAAGAAAGTGGTTGATCCATTTTCTAAGAAAGATTGGTATGATGTGAAAGCACCTGCTATGTTCAATATAAGAAATATTGGAAAGACGCTCGTCACCAGGACCCAAGGAACCAAAATTGCGTCTGATGGTCTCAAGGGTCGTGTGTTTGAAGTGAGTCTTGCTGATTTGCAGAATGATGAAGTTGCATTTAGAAAATTCAAGCTGATTACTGAAGATGTTCAGGGTAAAAACTGCCTGACTAACTTCCATGGCATGGATCTTACCCGTGACAAAATGTGTTCCATGGT	.	Long RNA	RP11-568G20.1	.	.	.	.	-75.8	0.962259	0.918623	0.998153	No	0.268
302	chr15	60061015	60061371	Y	+	18	470	18.736	52.2611	47.0108	.	.	.	pseudogene	sense	356	GCTCAGCACCAACAGGTCCGCCAAATCCGGAAGAAGATGATGGAAATCATGATCCGAGAGGTGCAGACAAATGACTTGAAAGAAGTGGTCAATAAATTGATTCCAGACAGCATTGGAAAAGACATAGAAAAGGCTTGCCAATCTATTTATCCTCTCCATGATGTCTTCGTTAGAAAAGTAAAAATGCTGAAGAAGCCCAAGTTTGAATTGGGAAAGCTCATGGAGCTTCATGGTGAAGGCAGTAGTTCTGGAAAAGCCACTGGGGACGAGACAGGTGCTAAAGTTGAACGAGCTGATGGATATGAACCACCAGTCCAAGAATCTGTTTAAAGTTCAGACTTCAAATAGTGGCAAAT	.	Long RNA	RP11-568G20.1	.	.	.	.	-87.9	0.915868	0.93814	0.948972	T23988	0.057
303	chr15	65243490	65243817	Y	-	21	545	21.6263	59.8333	54.5712	.	.	.	.	sense	327	cagaagaaaagaaagaagagaagaaagaagaagagggaagaggaagaagaaaacaggaagaaggaagaggaagaagaagaagaaaagaagaggaagaagaaagaagaaaaaagagaaaagaaaagaagaaagggaagaagaaagaaaaaaaagaagaaaagaggaagaaaagaaaaaaaaaagaggaagaagaaaagaaaaagaaagaagaaagaggaagaagaaaggaggaggaaagaagaaagaaagaggaaagaagaaagaagaagaagagaagaaaagaagaagaagagaagaaaagaagaagaagaagaaaagaaaaagaag	.	Repeats	CT-rich	.	.	.	.	0	0.0223833	0.0220417	0.0224917	No	1
304	chr15	65243981	65244245	Y	-	112	3642	110.502	370.338	364.243	.	.	.	.	sense	264	cagaaggaaagaagaagaagagaagaaaggaagaagaggaaagaacaagaggacgaagagaaaagaaaaagaaagaaggaaagaagaaagaaaaagaggaagaagaaagaataagaaagaataagaaggatgaagaagaggaagaaagaagaaaagaggaaagaaagaaggaagaagaaaggaaagaagaagaaaaggaaagaaggaagaagaggaagaaggaggaaagaagaaaaggaaagaaaaagaaaagaaaggaagaac	.	Repeats	CT-rich	.	.	.	.	0	0	0	0	No	1
305	chr15	65244335	65245230	Y	-	76	2406	75.6005	246.577	240.655	.	.	.	.	sense	895	taagaagaaggagaagaagagaaggaaggagaaggaagaaggagaagaagaaagagaagaaaagaggaagaagaaggagaagagacaaggagaagaaaggaagaaggaggaggaagaaggaggagaaggagaagaaaagaaggagaaggaagaagaaaagaaaggaggaggagaagaggaaagaaggaggaagaaggagaagaagaaagaagaaaggagaagaactaagaagaaaaaggagaggaagaagaagaaggaagaaggggaagaagaaggaggaggagaaggaagaagaaagaaggagaagaagaaagaaaagacgaagaaggagaggaggaagaagaagaaggaagaaaaagaaaagaaggagaagaagaacgaaggagaaggaaggaggag…	.	Repeats	CT-rich	.	.	.	.	-1.8	0	0	0	No	0.118
306	chr15	65245698	65246089	Y	-	16	401	16.7378	45.2443	40.1294	.	.	.	.	sense	391	aaggagaagaagaaagaagaagggagaaggagaagaaaagaaggagaagaggaaaaggaagaaggagaaagaaaaggagaaggaagaggaagaagaaggagaaagaagaagaagaagaagaactaagaagaactaagaagaaggagaagaagagggagagaagaaagaagaaaaggagaaggaagaagaagaactaagaagaaggaggaagaaagaaggagaaggaagaagaaagaaggagaaggaagaaggagaggagaagaaggaagaaggagaaggaagaggaggaagaactaaagaaggagaaggaagaggaagaaggagagaagaaagaagaaaaggaagaaggaggaggaagaagaagggaggaggaggagaagaaaaggagaac	.	Repeats	CT-rich	.	.	.	.	0	0	0	0	No	1
307	chr15	65246182	65246998	Y	-	104	3546	103.487	360.722	354.647	.	.	.	.	sense	816	aagaagaaagaaggagaagaagaaggaagaagaagaaaaggaagaagaaaagaggaaggaggaggaagaaggagaagaaggaagaataaggaagaaggagaacaaggagaaggaagaagaaaagaaggagaaggaggaagaaggagaagaaagaggagaagaaggaagaagaaggagaaggaagaagaaaaagaggaagaaggagaagagggaagaagaagaaggagaagaagacgaacgaaggaggagaggaggaagaagaggaaggaagaagaaaggagaagaagaaaagaagaaaaggaagaagaaggagaagaagaagagaaggagaggaggaagaagaactaagaaggaagagaagaaggagaaggagaagaaaaggagaactaagaaggaaga…	.	Repeats	CT-rich	.	.	.	.	0	0	0	0	No	1
308	chr15	66791659	66791934	Y	-	22	550	22.4916	60.2762	55.0073	.	.	.	exon	sense	275	AGATGAGAAGGCGGCGGTTGCAGGCAAGAAGCCTGTGGTAGGTAAGAAAGGAAAGAAGGCTGCTGTTGGTGTTAAGAAGCAGAAGAAGCCTCTGGTGGGAAAAAAGGCAGCAGCTACCAAGAAACCAGCCCCTGAAAAGAAGCCTGCAGAGAAGAAACCTACTACAGAGGAGAAGAAGCCTGCTGCATAAACTCTTAAATTTGATTATTCCATAAAGGTCAAATCATTTTGGACAGCTTCTTTTGAATAAAGACCTGATTATACAGGCAGTGAGA	.	RBP	RPL4	CPSF6	.	.	.	-65	0.305007	0.359353	0.352549	T5076,T32542,T32900	0.056
309	chr15	66792459	66792671	Y	-	8	172	8.8664	21.963	17.2118	.	.	.	exon	sense	212	TTGAAAAGCCCAGAGATCCAAAGAGCCCTTCGAGCACCACGGTAAAGTGATACTTAGAGTGTAATTCTCGCCCCAACCCTATACTATTGGTTGTTTCAAAAATTTGTATGTGTATAATGTTAAGTAAAATGTTGATACAGTATCTGCTTTTTTATAGCAAGAAGATCCATCGCAGAGTCCTAAAGAAGAACCCACTGAAAAACTTGAGAATC	.	RBP	RPL4	KHSRP	.	.	.	-25.7	0.493608	0.476566	0.470745	T32900,T32104	0.999
310	chr15	69745156	69745360	Y	+	51	1583	51.2775	164.168	158.363	.	.	ALL_AGO|slc2284_chr15|58|4|14|0.29|COORDS=chr15+:67532323	exon	sense	204	CCCCTTTCCTCAGCTGCCGCCAAGGTGCTCGGTCCTTCCGAGGAAGCTAAGGCTGCGTTGGGGTGAGGCCCTCACTTCATCCGGCGACTAGCACCGCGTCCGGCAGCGCCAGCCCTACACTCGCCCGCGCCATGGCCTCTGTCTCCGAGCTCGCCTGCATCTACTCGGCCCTCATTCTGCACGACGATGAGGTGACAGTCACGG	.	RBP	RPLP1	SERBP1	.	.	.	-70.1	0.344696	0.851559	0.839569	T24311,T1935,T9188,T31929	0.663
311	chr15	69747506	69747885	Y	+	63	1990	63.0241	204.956	199.039	.	.	ALL_AGO|slc2290_chr15|48|7|31|0.23|COORDS=chr15+:67534898	exon	sense	379	AGGCCCTGGCCAACGTCAACATTGGGAGCCTCATCTGCAATGTAGGGGCCGGTGGACCTGCTCCAGCAGCTGGTGCTGCACCAGCAGGAGGTCCTGCCCCCTCCACTGCTGCTGCTCCAGGTAGGAAACATGGAGTTTTTAGTATTGGGAGGAGTGTAGAGATTTTTTAAAAAATAGTATTATAGACAAAATTGCCATTAATTTTTCACAAGTATATGAAGTATGGAAATCCTAACACCTGATTGACTTTTTTTTTCTAGCTGAGGAGAAGAAAGTGGAAGCAAAGAAAGAAGAATCCGAGGAGTCTGATGATGACATGGGCTTTGGTCTTTTTGACTAAACCTCTTTTATAACATGTTCAATAAAAAGCTGAACTTTA	.	RBP	RPLP1	DHX30,PUM2	.	.	.	-112.7	0.560958	0.451319	0.524042	T24312,T1935,T9188,T31929,T24419	0.003
312	chr15	71633485	71633641	Y	-	12	263	12.7163	31.2731	26.3296	.	.	.	pseudogene	sense	156	CCCATACATGAGCTCTCCCTGCCACATTGAGATGATCCTTACGGAAAAGGAACAGATTGTTCCTAAACCAGAAGAGGAGGTTGCCCAGAAGAAAAAGATATCCCAGAAGAAACTGAAGAAACAAAAACTTATGGCACGGGAGTAAATTCAGCATTA	.	Long RNA	RP11-592N21.1	.	Long RNA	THSD4	.	-32.8	0.805179	0.922571	0.970596	No	0.04
313	chr15	71633751	71633962	Y	-	8	162	8.8282	20.9649	16.242	.	.	.	pseudogene	sense	211	TGAAACTGCTCAGGCCATCAAGGGTATGCATATACGAAAAGCCACGAAGTATCTGAAAGATGTCACTTTACAGAAACAGTGTGTACCATTCCGACATTACAACGGTGGAGTTGGCAGGTGTGCGCAGGCCAAGCAGTGGGGCTGGACACAAGGTCGGTGGCCCAAAAAGAGTGCTGAATTCTTGCTGCACATGCTTAAAAACGCAGAGAGT	.	Long RNA	RP11-592N21.1	.	Long RNA	THSD4	.	-56.9	0.939076	0.974934	0.999697	T25487	0.229
314	chr15	72766987	72767160	Y	+	11	259	11.8333	30.8987	25.9257	.	.	.	exon	sense	173	CGgacgagggctacaactacgagttcgacgaggacgaggagtgcagtgaggaggacagcggcgccgaggaggaggaggacgaagacgacgacgaGCCGGACGATGATACCCTGGATCTGGGCGAGGTGGAGCTGGTGGAGCCCGGGCTGGGCGTCGGCGGGGAGCGGGACGGA	.	RBP	ARIH1	TRA2A	Long RNA	RP11-1007O24.3	.	-47.8	0.994896	0.999561	0.999809	No	0.948
315	chr15	73925601	73925687	Y	-	7	148	7.89416	19.592	14.8933	.	.	.	exon	sense	86	GGAGCCGAGCCGCGGCTGcctccctcgctcactccctcgcgcactcgcccgccccctccctccctcccctcccttccCCGGCCCCG	.	RBP	NPTN	EIF3D	.	.	.	-15.2	0.791686	0.778535	0.669291	No	0.662
316	chr15	90544208	90544353	Y	+	5	88	5.8943	13.3422	8.88809	.	.	.	Intergenic	sense	145	CTGAGAGGAGAaaaaaaaaagagagagagagaaagaaagaaaagaaggaaaaaagGCGTGACTTGATTTTCAAACGAAACTCCCACAGCAAACAAAACCCTTTTAGAGAAATaagaaaggaggaagaaggaagaaaagagggaag	.	Repeats	A-rich	.	.	.	.	-11.31	0.906766	0.850007	0.876303	No	0.035
317	chr15	91423004	91423098	Y	+	29	755	29.2975	81.04	75.5822	.	.	.	intron	sense	94	GTGAGGGCAGGCTGGCCCGGCAGGCTGGATGTGGAGTTAGGTAGAAGGCACTCTGTGCCTGACAGCTGACCCTACCTTCCCTGTCCCCACAGTG	Y	RBP	FURIN	XPO5	.	.	.	-40.7	0.195117	0.159787	0.145319	No	0.025
318	chr16	203943	204325	Y	-	196	6612	191.237	667.631	661.262	.	.	.	.	sense	382	TGAAGTCGGCGGGGAAGCGCGCGGCCAGGGTGACCAGCAGGCAGTGGGACAGGAGCTGGGGGCGGGGGCGGCTCAGTGAGGGGGCGGGGCCTAGCCCGGGCCCCGCCCGGCGACccccgcatccgccccgcgaccccgcccctccccgcccctccccgccccgccccgccccgccccgcccgcaccgcgccccgccccgtcccgccccgcccgcaccgcgccccgcGCACCTTGAAGTTGACCGGGTCCACGCGCAGGATGTAGGCGTGCAGCTCGCTCAGCTTGGACAGGGCGCCGCCGATGTCGTCGATGCTCTTCACCGCGTCGCCCACGGCGGCCACCACCTTGGAGCCGTGCGCGCGCAACTGCGCGGACCCCGGGT	.	Repeats	(CGGGG)n	.	.	.	.	-200.3	0.278775	0.399963	0.414639	No	0.696
319	chr16	215972	216694	Y	-	109	3296	106.073	335.685	329.659	.	.	.	exon	antisense	722	TCGGTCAGCACCACGGCCACACCAGTCAGGAACTTGTCCCACGCCGCTTGCATTTGCACGGTGAACTCGTCCTGCAGGTGGGAGGCCAGCACGACGTGGAAACACTGGATTAGCAGCTGCAGGAGAAGGGGCCGGTGAGACGGGGTCTGCCCCGCTAGGGACCCCCAGAGCCCCCCCACCCCGGCTGCGCGCTGCACCATTGCCCCGGCCGGAAAGGCCTCACCGGAAAGTTGGCTGGGTCCACGCGCAGCACGAGCGCGTGCAGGTCCGCCAGCGGGCTCAGCGCGGCGCGCAGGTTGTCCACGTGCTGCACCGCCGCGCCCACAGCCGCCAGCATGCGCTGCCCGTGGCTCAGCAGCTGCGTCGCGTCCTGGCAGGCGCTCAGGTGCGGGAAGTAGA…	.	Antisense	.	.	Long RNA	HBM	.	-335.6	0.133201	0.0547535	0.218576	No	0.688
320	chr16	215975	216267	Y	+	8	125	8.56492	17.227	12.5911	.	.	.	exon	sense	292	CAGAGCACGTCAGGCGGCGCCATGCTCAGCGCCCAGGAGCGCGCCCAAATCGCGCAGGTCTGGGACCTGATTGCGGGCCACGAGGCGCAATTCGGGGCGGAGCTGCTGCTCAGGTCGGTAGAGGCGGGGTCTCCGGGAGCTCAGGGAGGTGGAGATGAGGGTTTTGGGCGCGTGGGCCGCCAACGCCATCCAAGGTCCTTCGGGTGCGGATCCCCGGGCTCTGGGCGGTGTGGGCGCTAGTGAAGCCCCACGCAGCCGCCCTCCTCCCCGGTCACTGACCTGGTCCTGCAGG	.	Long RNA	HBM	.	.	.	.	-144.6	0.039339	0.0770479	0.100692	T9000	0.332
321	chr16	222873	223709	Y	+	178	6020	174.332	608.499	602.032	.	.	.	exon	sense	836	CACTCTTCTGGTCCCCACAGACTCAGAGAGAACCCACCATGGTGCTGTCTCCTGCCGACAAGACCAACGTCAAGGCCGCCTGGGGTAAGGTCGGCGCGCACGCTGGCGAGTATGGTGCGGAGGCCCTGGAGAGGTGAGGCTCCCTCCCCTGCTCCGACCCGGGCTCCTCGCCCGCCCGGACCCACAGGCCACCCTCAACCGTCCTGGCCCCGGACCCAAACCCCACCCCTCACTCTGCTTCTCCCCGCAGGATGTTCCTGTCCTTCCCCACCACCAAGACCTACTTCCCGCACTTCGACCTGAGCCACGGCTCTGCCCAGGTTAAGGGCCACGGCAAGAAGGTGGCCGACGCGCTGACCAACGCCGTGGCGCACGTGGACGACATGCCCAACGCGCTGT…	.	Long RNA	HBA2	.	.	.	.	-351.9	0.325005	0.315514	0.367212	T1436,T23775,T23955,T15212	0.234
322	chr16	223129	223709	Y	-	780	22740	579.99	2281.39	2274.1	.	.	.	exon	antisense	580	TGCTGCCCACTCAGACTTTATTCAAAGACCAGGAAGGGCCGGTGCAAGGAGGGGAGGAGGGCCCGTTGGGAGGCCCAGCGGGCAGGAGGAACGGCTACCGAGGCTCCAGCTTAACGGTATTTGGAGGTCAGCACGGTGCTCACAGAAGCCAGGAACTTGTCCAGGGAGGCGTGCACCGCAGGGGTGAACTCGGCGGGGAGGTGGGCGGCCAGGGTCACCAGCAGGCAGTGGCTTAGGAGCTGTGCAGAGAAGAGGGTCAGTGCGGCCCAGGCCCGCAGCCGCCGCCTGCGCTACACCTCCCGCAACCCGCGTGATCCTCTGCCCTGAGAGGAAGGCGCCATCTCGCCCCTCGACCCAGATCGCTCCCGGCCCGCCGCTCACCTTGAAGTTGACCGGGTC…	.	Antisense	.	.	Long RNA	HBA2	.	-264.4	0.377226	0.345843	0.41869	No	0.428
323	chr16	226677	227521	Y	+	180	5900	174.986	596.535	590.07	.	.	.	exon	sense	844	CACTCTTCTGGTCCCCACAGACTCAGAGAGAACCCACCATGGTGCTGTCTCCTGCCGACAAGACCAACGTCAAGGCCGCCTGGGGTAAGGTCGGCGCGCACGCTGGCGAGTATGGTGCGGAGGCCCTGGAGAGGTGAGGCTCCCTCCCCTGCTCCGACCCGGGCTCCTCGCCCGCCCGGACCCACAGGCCACCCTCAACCGTCCTGGCCCCGGACCCAAACCCCACCCCTCACTCTGCTTCTCCCCGCAGGATGTTCCTGTCCTTCCCCACCACCAAGACCTACTTCCCGCACTTCGACCTGAGCCACGGCTCTGCCCAGGTTAAGGGCCACGGCAAGAAGGTGGCCGACGCGCTGACCAACGCCGTGGCGCACGTGGACGACATGCCCAACGCGCTGT…	.	Long RNA	HBA1	.	.	.	.	-350.5	0.320038	0.213171	0.350558	T6081,T22678,T15210,T24372	0.285
324	chr16	226679	227128	Y	-	52	1284	49.9644	134.127	128.485	.	.	.	exon	antisense	449	AAGTTGACCGGGTCCACCCGAAGCTTGTGCGCGTGCAGGTCGCTCAGGGCGGACAGCGCGTTGGGCATGTCGTCCACGTGCGCCACGGCGTTGGTCAGCGCGTCGGCCACCTTCTTGCCGTGGCCCTTAACCTGGGCAGAGCCGTGGCTCAGGTCGAAGTGCGGGAAGTAGGTCTTGGTGGTGGGGAAGGACAGGAACATCCTGCGGGGAGAAGCAGAGTGAGGGGTGGGGTTTGGGTCCGGGGCCAGGACGGTTGAGGGTGGCCTGTGGGTCCGGGCGGGCGAGGAGCCCGGGTCGGAGCAGGGGAGGGAGCCTCACCTCTCCAGGGCCTCCGCACCATACTCGCCAGCGTGCGCGCCGACCTTACCCCAGGCGGCCTTGACGTTGGTCTTGTCGGCA…	.	Antisense	.	.	Long RNA	HBA1	.	-205.9	0.314287	0.250051	0.39637	No	0.628
325	chr16	227335	227447	Y	-	671	19756	525.506	1982.88	1975.63	.	.	.	exon	antisense	112	CCCAAGGGGCAAGAAGCATGGCCACCGAGGCTCCAGCTTAACGGTATTTGGAGGTCAGCACGGTGCTCACAGAAGCCAGGAACTTGTCCAGGGAGGCGTGCACCGCAGGGGT	.	Antisense	.	.	RBP	HBA1	YBX3	-33.1	0.500259	0.119688	0.505804	No	0.723
326	chr16	230338	230855	Y	-	693	19097	480.436	1916.88	1909.73	.	.	.	exon	antisense	517	GGTCCACTCGCAGCTGGCACGCGTGCAGGTGGCTCAGCGCGGACAGCGCGTGGGGTAGGTCGTCCAGGCGCTCCACGGCGAGGCTCAGCGCGTCCGCCACCTTCTGGCCGTGGGCTCTGACTTGTGAGGAGCCGGGGCTCAGGTCCAGGTGGGAGAAGTAGGTCTTCGTGGCGGGGAAAGCCAGGAAGGTCCTGCGAGAGGAACGTGGGTGAGGCGCGTCCGGGGGGCTTGGGGAGGGAGGGCCCCTGGGGGCGGGGGCGCCCAGCCTGCCGCACCTTTCCAGGGCCTCTGTCGTGTAGACGCCGACGTTGCTGCCCAGCTTCTTCCACAGGGCGCGCACCAGCGCCCGGTCCTCCGCGGACAGCGCCATCCCCGCGCTGGAACCCGCCGCGCCCTGCG…	.	Antisense	.	.	Long RNA	HBQ1	.	-292	0.137021	0.186006	0.288424	No	0.274
327	chr16	231030	231158	Y	-	120	3783	117.433	384.531	378.385	.	.	.	exon	antisense	128	CTCAAACACGGGGAAGGTCGCCTGGGGATCCCGCGGCCACCCACCCACAGTTCAGCGGTACTCGGAAACCAGCGCCGAGATAACGTGGCTCAGGAACTTGTCCAGCGACGCCTGCAGCGCGGGGCTGA	.	Antisense	.	.	RBP	HBQ1	PUS1	-46.3	0.20918	0.0570781	0.253492	No	0.414
328	chr16	718411	718488	Y	+	13	297	13.7271	34.7704	29.74	.	.	.	intron	sense	77	GTAAGGGGCACGCCCGCCGCGGGGGTGGGAGCGGGCCCAGCCGGGGGTCCCTGGTGAGCGCGCGGGTCCCTTGCAGG	Y	RBP	RHOT2	XPO5	.	.	.	-44.5	0.408078	0.0461169	0.100013	T32180,T35840	0.098
329	chr16	2012069	2012247	Y	-	11	220	11.6489	26.9432	22.0887	.	.	.	exon	sense	178	CTAAGACCTACAGCTACCTGACCCCCGACCTCTGGAAGGAGACTGTATTCACCAAGTCTCCCTATCAGGAGTTCACTGACCACCTCGTCAAGACCCACACCAGAGTCTCCGTGCAGCGGACTCAGGCTCCAGCTGTGGCTACAACATAGGGTTTTTATACAAGAAAAATAAAGTGAAT	.	RBP	RPS2	DDX55	.	.	.	-46.8	0.703163	0.859421	0.866888	T28754,T28988,T29045,T28349,T29136	0.017
330	chr16	2012560	2012904	Y	-	17	386	17.5097	43.7677	38.661	.	Y	.	exon	sense	344	GTTGCTATCGGGGACTACAATGGCCACGTCGGTCTGGGTGTTAAGTGCTCCAAGGAGGTGGCCACCGCCATCCGTGGGGCCATCATCCTGGCCAAGCTCTCCATCGTCCCCGTGCGCAGAGGCTACTGGGGGAACAAGATCGGCAAGCCCCACACTGTCCCTTGCAAGGTAGGCTGGTGGCAGGTGATGGGCCTGCCGTGGGGCAGGCTCCCTCGGGCCCCCGTCTCCTGACTCCTTCCCTCACCAGGTGACAGGCCGCTGCGGCTCTGTGCTGGTACGCCTCATCCCTGCACCCAGGGGCACTGGCATCGTCTCCGCACCTGTGCCTAAGAAGCTGCTCATGA	.	RBP	RPS2	BUD13	.	.	.	-146.1	0.655459	0.731855	0.764895	T28754,T28988,T29045,T28349,T29136,T28582	0.185
331	chr16	2014282	2014625	Y	-	21	543	21.6183	59.6258	54.365	.	.	ALL_AGO|slc7392_chr17|56|4|9|0.44|COORDS=chr17-:19290736	exon	sense	343	TGGCGGATGACGCCGGTGCAGCGGGGGGGCCCGGGGGCCCTGGTGGCCCTGGGATGGGGAACCGCGGTGGCTTCCGCGGAGGTTTCGGCAGTGGCATCCGGGGCCGGGGTCGCGGCCGTGGACGGGGCCGGGGCCGAGGCCGCGGAGCTCGCGGAGGCAAGGCCGAGGATAAGGAGGTAGGTATCAGCCACGCTCGGGGTCGGGCCCCTGGGCGGCGCCGGAGAGCGGTCCTGGTCACTGGCGCCTTTTCTCCCTTTAGTGGATGCCCGTCACCAAGTTGGGCCGCTTGGTCAAGGACATGAAGATCAAGTCCCTGGAGGAGATCTATCTCTTCTCCCTGCCT	.	RBP	RPS2	DHX30	.	.	.	-182.8	0.460641	0.671487	0.730539	T29135,T28225,T8014,T28347,T28151	0.019
332	chr16	2025439	2025529	Y	+	5	80	5.85138	12.4379	8.01899	Y	Y	ALL_AGO|slc227_chr16|39|251|1096|0.23|COORDS=chr16+:1965427	intron	sense	90	GTGTGTTGGGCCGGGACATGGGCAGGCGGTAGGGGCTGGGGAAGGCCTGTGGACCTGAGAGTCTCAGCAGCCCTGTCCCCACCCACACAG	Y	RBP	TBL3	EFTUD2	.	.	.	-43.4	0.138567	0.0663444	0.0750556	No	0.018
333	chr16	2149771	2149861	Y	-	34	907	34.1569	96.2912	90.7867	.	.	.	intron	sense	90	GTGGGTGCCGTAGGGGTCGGGGCAGCCTCTTCCTGCCCAGCCCTTCCTGCCCCTCAGCCTCACCTGTGTGGCCTCCTCTCCTCCACACAG	Y	RBP	PKD1	EFTUD2	.	.	.	-37.1	0.0612444	0.0952111	0.127889	No	0.004
334	chr16	11642996	11643319	Y	-	8	156	8.80107	20.3811	15.6659	.	.	ALL_AGO|slc4880_chr16|46|3|5|0.60|COORDS=chr16-:11550690	exon	sense	323	GAAATTGCTGCTTGGAGTCGTGCATAGGACTTGCAAAGACATTCCCCTTGAGTGTCAGTTCCACGGTTTCCTGCCTCCCTGAGACCCTGAGTCCTGCCATCTAACTGTGATCATTGCCCTATCCGAATATCTTCCTGTGATCTGCCATCAGTGGCTCTTTTTTCCTGCTTCCATGGGCCTTTCTGGTGGCAGTCTCAAACTGAGAAGCCACAGTTGCCTTATTTTTGAGGCTGTTCTGCCCAGAGCTCGGCTGAACCAGCCTTTAGTGCCTACCATTATCTTATCCGTCTCTTCCCGTCCCTGATGACAAAGATCTTGCCTTA	.	RBP	LITAF	PCBP2	.	.	.	-85.3	0.121882	0.160105	0.201344	No	0.106
335	chr16	15027133	15027223	Y	+	40	1019	39.4814	107.554	101.962	.	.	.	intron	sense	90	GTGGGTGCCGTAGGGGTCGGGACAGCCTCTTCCTGCCCAGCCCTTCCTGCCCCTCAGCCTCACCTGTGTGGCCTCCTCTCCTCCACACAG	Y	Long RNA	NPIPA1	.	.	.	.	-33.9	0.3291	0.0994778	0.153622	No	0.007
336	chr16	15221453	15221543	Y	-	33	841	32.9672	89.6219	84.1624	.	.	.	intron	sense	90	GTGGGTGCCGTAGGGGTCGGGACAGCCTCTTCCTGCCCAGCCCTTCCTGCCCCTCAGCCTCACCTGTGTGGCCTCCTCTCCTCCACACAG	Y	Long RNA	RP11-1186N24.5	.	Long RNA	PDXDC1	.	-33.9	0.143889	0.0436889	0.146078	No	0.003
337	chr16	16425620	16425710	Y	+	35	894	34.851	94.9332	89.4041	.	.	.	intron	sense	90	GTGGGTGCCGTAGGGGTCGGGACAGCCTCTTCCTGCCCAGCCCTTCCTGCCCCTCAGCCTCACCTGTGTGGCCTCCTCTCCTCCACACAG	Y	Long RNA	PKD1P1	.	.	.	.	-33.9	0.311478	0.0998111	0.1382	No	0.002
338	chr16	16468913	16469003	Y	+	45	1224	44.6831	128.161	122.498	.	.	.	intron	sense	90	GTGGGTGCCGTAGGGGTCGGGACAGCCTCTTCCTGCCCAGCCCTTCCTGCCCCTCAGCCTCACCTGTGTGGCCTCCTCTCCTCCACACAG	Y	Long RNA	RP11-958N24.2	.	.	.	.	-33.9	0.375889	0.0995	0.131378	No	0.004
339	chr16	18430617	18430707	Y	-	44	1145	43.3663	120.173	114.581	.	.	.	intron	sense	90	GTGGGTGCCGTAGGGGTCGGGACAGCCTCTTCCTGCCCAGCCCTTCCTGCCCCTCAGCCTCACCTGTGTGGCCTCCTCTCCTCCACACAG	Y	Long RNA	RP11-1212A22.1	.	.	.	.	-33.9	0.138322	0.0277444	0.154356	No	0.009
340	chr16	18470719	18470809	Y	-	34	871	33.9368	92.6701	87.1901	.	.	.	intron	sense	90	GTGGGTGCCGTAGGGGTCGGGACAGCCTCTTCCTGCCCAGCCCTTCCTGCCCCTCAGCCTCACCTGTGTGGCCTCCTCTCCTCCACACAG	Y	Long RNA	RP11-1212A22.4	.	.	.	.	-33.9	0.253511	0.134033	0.123311	No	0.004
341	chr16	18794320	18794405	Y	-	13	224	13.111	27.3299	22.4689	.	.	.	exon	sense	85	TCAGCTGGCATCATGGACCATGAAGAAGCAAGACGAAAACACACAGGAGGGAAAATCCTGGGATTCTTTTTCTAGGGATGTAATA	.	RBP	RPS15A	LARP4	.	.	.	-15.4	0.960682	0.972718	0.984671	T32497,T6246,T33197,T32981,T32256	0.293
342	chr16	18800311	18800424	Y	-	7	145	7.88124	19.1868	14.5188	.	.	.	exon	sense	113	GAATGTCCTGGCAGATGCTCTCAAGAGTATCAACAATGCCGAAAAGAGAGGCAAACGCCAGGTGCTTATTAGGCCGTGCTCCAAAGTCATCGTCCGGTTTCTCACTGTGATGA	.	RBP	RPS15A	IGF2BP2	.	.	.	-31.7	0.989133	0.955301	0.970124	T32497,T6246,T33197,T32256	0.104
343	chr16	20733601	20733674	N	-	7	114	7.70957	16.012	11.4496	.	.	.	intron	sense	73	TTTAAAGGATAAGAGTCATCAGTTGGTCTTAGGAACCAAAAACATTGTTGCAACTCCAAATAAAAGTAACAAA	.	Long RNA	THUMPD1	.	RBP	ACSM3	SFPQ	-8.5	0	0	0	No	0.284
344	chr16	23479419	23479484	Y	-	32	857	32.2706	91.2609	85.7867	.	.	.	.	sense	65	tGAAAgagagagagagggagggaaggaggaaaggaaggaaggagAAGAGAAAAAGAAAAGAAAGT	.	Repeats	C-rich	.	.	.	.	0	0.0435231	0.0354308	0.0376923	No	1
345	chr16	24228399	24228506	Y	+	420	15882	410.572	1595.28	1588.23	.	.	.	.	sense	107	ATGGAAAGagaaagaaaggaaagaaagaagaaaaagaaagaaggaaagaaagaaagagaaaggaaggaaggaaagaaggaaggaaaagaaggaaggaaggaaggaaT	.	Repeats	GA-rich	.	.	.	.	0	0.0209626	0.0133738	0.014514	No	1
346	chr16	24551606	24551746	Y	+	5	94	5.91663	13.9689	9.44617	.	.	.	exon	sense	140	TGACTGCACCGCCAATCCCCCCGTCTCTGCCGGCCCCTTAGCATGAGCGAGGGGGACCCAGCCGGGTGACATTGTGCCCGTTGGCGGATTCTCGATTTCCCCTCTTCCCCGTCCTCGTCCTCCTCCTCCCCCATGAAGTG	.	RBP	RBBP6	NONO	.	.	.	-37.3	0.814007	0.815907	0.791064	No	0.769
347	chr16	30081228	30081347	Y	+	8	169	8.8584	21.7327	16.9634	.	.	.	exon	sense	119	TGAAGCCCTGGGCCCTGACCTTCTCCTACGGCCGAGCCCTGCAGGCCTCTGCCCTGAAGGCCTGGGGCGGGAAGAAGGAGAACCTGAAGGCTGCGCAGGAGGAGTATGTCAAGCGAGCC	.	RBP	ALDOA	RBM15	.	.	.	-45.8	0.756866	0.963798	0.96821	No	0.254
348	chr16	30081585	30081734	Y	+	10	216	10.7951	26.5471	21.663	.	.	.	exon	sense	149	TCTTGAAGAGGAGGCCGCCTCCTCGGGGCTCCAGGCTGGCTTGCCCGCGCTCTTTCTTCCCTCGTGACAGTGGTGTGTGGTGTCGTCTGTGAATGCTAAGTCCATCACCCTTTCCGGCACACTGCCAAATAAACAGCTATTTAAGGGGG	.	RBP	ALDOA	DDX24	.	.	.	-45	0.55004	0.798423	0.698651	No	0.719
349	chr16	30129770	30129874	Y	-	10	209	10.76	25.7768	20.9372	.	.	ALL_AGO|slc5727_chr16|46|2|5|0.40|COORDS=chr16-:30037258	exon	sense	104	CGGAACCATCCTCAGCTACATTGTGCAGGACCTGATGGAGACTGACCTGTACAAGTTGCTGAAAAGCCAGCAGCTGAGCAATGACCATATCTGCTACTTCCTCT	.	RBP	MAPK3	BUD13	.	.	.	-27	0.889865	0.889923	0.891885	No	0.084
350	chr16	30198711	30198791	Y	+	5	90	5.8998	13.4835	9.01445	.	.	.	exon	sense	80	CGTCCCCACGAGGGGACCCGGCCCGTGCGTGCAGTGTTCGTGTCGGAGGGGAAGATCCTGACCACGGGCTTCAGCCGCAT	.	RBP	CORO1A	PPIG	.	.	.	-33.5	0.574063	0.820738	0.863313	No	0.251
351	chr16	30489267	30489378	Y	+	8	167	8.85101	21.5307	16.7646	.	.	.	.	sense	111	agggagggaaggaaggaaggggagaggaggagagagagataggaaggaaggaagaagaaaaagaaagatgaaggaaggaaggagaaggaaggaaggaaagaaaGAAAAggc	.	Repeats	HAL1-3A_ME	.	.	.	.	0	0.0516847	0.0513874	0.0542793	No	1
352	chr16	31173304	31173386	N	+	10	221	10.8168	27.0919	22.1957	.	.	.	Intergenic	unannotated	82	GCCTCAGAAAATTGAGGAAATCAAGGTCTTTCTGCTCACAGCCCGACAAAAGGATGCCAAATCTGTCAAGATCAAGAAAAAT	.	Unannotated	.	.	Unannotated	.	.	-13.4	0	0	0	No	0.177
353	chr16	46978245	46978330	Y	+	14	310	14.6285	36.0546	31.0012	.	.	.	Intergenic	sense	85	gaggaggaagaggaggaggaagaagaggaagaagaagaggcagaggaggaggaggaagaagaggaggaagaggaggaggagtaag	.	Repeats	GA-rich	.	.	.	.	0	0	0	0	No	1
354	chr16	51680240	51680435	Y	+	5	87	5.88939	13.2219	8.77732	.	.	.	pseudogene	sense	195	TGGCCACAACTGTGAAGTTAGAAAAGCCCTGTCAAAGCAAGAGATGGCTAGTGCTTCATCCAGCCAAAGAGGTCGAAGTGGTTCTGGAAACTTtggtggtggtcgtggaggtggtttcggtgggaatgacaacttcggtcgtggaggaaacttcagtggtcgtggtggctttggtggcagccgtggtggtggtgg	.	RBP	HNRNPA1P48	UCHL5	.	.	.	-58.2	0.962062	0.907462	0.722682	No	0.479
355	chr16	61089425	61089832	Y	-	22	586	22.6453	63.9364	58.6341	.	.	.	pseudogene	sense	407	GAGCCGCCACCAAAATGCAGATTTTCGTGAAAACCCTTACGGGGAAGACCATCACCCTCGAGGTTGAACCCTCGGATACGATAGAAAATGTAAAGGCCAAGATCCAGGGTAAGGAAGGAATTCCTCCTGATCAGCAGAGACTGATCTTTGCTGGCAAGCAGCTGGAAGATGGACGTACTTTGTCTGACTACAATATTCAAAAGGAGTCTACTCTTCATCTTGTGTTGAGACTTCTGGTGGTGCTAAGAAAAGGAAGAAGAAGTCTTACACCACTCCCAAGAAGAATAAGCACAAGAGAAAGAAGGTTAAGCTGGCTGTCCTGAAATACTATAAGGTGGATGAGAATGGCAAAATTAGTCGCCTTCGTCGAGAGTGCCCTTCTGATGAATGTGGTGCTGG…	.	Long RNA	RP11-51O6.1	.	.	.	.	-120	0.576342	0.732801	0.979489	No	0.012
356	chr16	67685748	67685821	Y	+	5	72	5.80346	11.6914	7.29648	.	Y	.	.	sense	73	gtaggctggatggggctgggctgggcaaggctgagcAAAGCCAGCCCATTAACCCCTGTCCTCTCCTGCCCTT	Y	Repeats	(GGCTG)n	.	.	.	.	-36.3	0.313945	0.126452	0.116329	No	0.002
357	chr16	67844895	67845028	Y	-	375	14847	370.418	1491.71	1484.75	.	.	.	.	sense	133	tcggccgggcgcggtggctcacgcctgtaatcccagctctcagggaggctaagaggcgggaggatagcttgagcccaggagttcgagacctgcctgggcaatatagcgagaccccgttctccagaaaaaggaa	.	Repeats	FLAM_C	.	.	.	.	-47.9	0.008	0.008	0.00866667	No	0.179
358	chr16	75611570	75611778	Y	+	5	80	5.85138	12.4379	8.01899	.	.	.	exon	sense	208	GAAAGGGAAGGTGATGCATTTATTCTGGGTTATGCTTGAAGTGTTAGATGGCTAAGTATTAAAATTATCCAAATTAAATCCTTAGCAGTCAGAACACTTGCTTCACTAGAATATGCCAACTGCCAATCATGTTGGACTGAGCTAATTTGTTCCTCTTTCTGAAACTATTAAGGTAAATAATTAACAATAAAAATTCTCTTATAAAGGC	.	RBP	GABARAPL2	YBX3	Long RNA	RP11-77K12.8	.	-41.7	0.916058	0.98826	0.955582	No	0.142
359	chr16	78785629	78785715	Y	+	13	317	13.8055	36.861	31.7893	.	.	.	.	sense	86	Tgaaagaaggaaaggaaggaaggaaggaggaagggaagaaggagggagggagggaaagagagagagagaaaaggaagagaaaggat	.	Repeats	GA-rich	.	.	.	.	0	0.0020814	0.000302326	0.000325581	No	1
360	chr16	84599394	84599765	Y	-	9	170	9.70745	21.7807	17.0399	.	.	.	exon	sense	371	GGCAGTGGCTTTGCTGCACGGTCTGAAACCACCTGTTCCCACCCTCTTGACCGAAATTTCCTTGTGACACAGAGAAGGGCAAAGGTCTGAGCCCAGAGTTGACGGAGGGAGTATTTCAGGGTTCACTTCAGGGGCTCCCAAAGCGACAAGATCGTTAGGGAGAGAGGCCCAGGGTGGGGACTGGGAATTTAAGGAGAGCTGGGAACGGATCCCTTAGGTTCAGGAAGCTTCTGTGTAAGCTGCGAGGATGGCTTGGGCCGAAGGGTTGCTCTGCCCGCCGCGCTAGCTGTGAGCTGAGCAAAGCCCTGGGCTCACAGCACCCCAAAAGCCTGTGGCTTCAGTCCTGCGTCTGCACCACACATTCAAAAGGA	.	RBP	COTL1	UPF1	.	.	.	-143.7	0.0853261	0.0301051	0.0256954	No	0.01
361	chr16	84600340	84600541	Y	-	5	83	5.86738	12.7408	8.31952	.	.	.	exon	sense	201	GATCAGTGATCGGAAGGAGCTGGAGGAAGATTTCATCAAGAGCGAGCTGAAGAAGGCGGGGGGAGCCAATTACGACGCCCAGACGGAGTAACCCCAGCCCCCGCCACACCACCCCTTGCCAAAGTCATCTGCCTGCTCCCCGGGGGAGAGGACCGCCGGCCTCAGCTACTAGCCCACCAGCCCACCAGGGAGAAAAGAAGC	.	RBP	COTL1	RBM15	.	.	.	-64.2	0.611114	0.705622	0.681199	No	0.481
362	chr16	84651444	84651652	Y	-	5	95	5.92062	14.0983	9.58091	.	.	.	exon	sense	208	ggcgccgcgtagccgtcgccaccgccgccagcccgtgcgccctcggcgcgtacccgccgcgctcccatccccgccgccgGCCAGGGGCGCGCTCGGCCGCCCCGGACAGTGTCCCGCTGCGGCTCCGCGGCGATGGCCACCAAGATCGACAAAGAGGCTTGCCGGGCGGCGTACAACCTGGTGCGCGACGACGGCTCGGCCGTCATCT	.	RBP	COTL1	METAP2	.	.	.	-106.4	0.466678	0.388558	0.383534	No	0.282
363	chr16	85838546	85838710	Y	+	10	179	10.5533	22.7247	17.9201	.	.	.	exon	sense	164	TGTTGTGAAGAGCGAAGACTTTTCGCTCCCAGCTTATATGGATCGGCGTGACCACCCCTTGCCGGAGGTGGCCCATGTCAAGCACCTGTCTGCCAGCCAGAAGGCATTGAAGGAGAAGGAGAAGGCCTCCTGGAGCAGCCTCTCCATGGATGAGAAAGTCGAGT	.	RBP	COX4I1	DKC1	.	.	.	-51.2	0.42964	0.73703	0.779652	No	0.533
364	chr16	89627358	89627468	Y	+	16	372	16.6181	42.4183	37.2709	.	.	.	exon	sense	110	TAGGCAGCCATGGCGCCCAGCCGGAATGGCATGGTCTTGAAGCCCCACTTCCACAAGGACTGGCAGCGGCGCGTGGCCACGTGGTTCAACCAGCCGGCCCGTAAGATCCG	.	RBP	RPL13	GEMIN5	.	.	.	-36.3	0.737473	0.938882	0.981836	T24782,T32232,T32194	0.772
365	chr16	89627637	89627763	Y	+	8	153	8.78498	20.0706	15.3403	.	.	.	exon	sense	126	TAAGGCCCGGCAAGCCAAGGCGCGCCGCATCGCCCCGCGCCCCGCGTCGGGTCCCATCCGGCCCATCGTGCGCTGCCCCACGGTTCGGTACCACACGAAGGTGCGCGCCGGCCGCGGCTTCAGCCT	.	RBP	RPL13	SND1	.	.	.	-55.4	0.551373	0.648802	0.84131	T32232,T32194,T32817,T24783	0.33
366	chr16	89628007	89628160	Y	+	20	453	20.3121	50.5975	45.3647	.	.	.	exon	sense	153	TGGCCCGGACCATCGGCATTTCTGTGGATCCGAGGAGGCGGAACAAGTCCACGGAGTCCCTGCAGGCCAACGTGCAGCGGCTGAAGGAGTACCGCTCCAAACTCATCCTCTTCCCCAGGAAGCCCTCGGCCCCCAAGAAGGGAGACAGTTCTG	.	RBP	RPL13	METAP2	.	.	.	-52.8	0.949065	0.921307	0.960294	T32232,T32194,T32817,T24783,T24010,T14212	0.253
367	chr16	89629296	89629559	Y	+	17	393	17.5541	44.5301	39.3591	.	.	.	exon	sense	263	TAAGAAGGAGAAAGCTCGAGTCATCACTGAGGAAGAGAAGAATTTCAAAGCCTTCGCTAGTCTCCGTATGGCCCGTGCCAACGCCCGGCTCTTCGGCATACGGGCAAAAAGAGCCAAGGAAGCCGCAGAACAGGATGTTGAAAAGAAAAAATAAAGCCCTCCTGGGGACTTGGAATCAGTCGGCAGTCATGCTGGGTCTCCACGTGGTGTGTTTCGTGGGAACAACTGGGCCTGGGATGGGGCTTCACTGCTGTGACTTCCTC	.	RBP	RPL13	CSTF2T	.	.	.	-79.6	0.34073	0.492137	0.593346	T32232,T24010,T20679	0.431
368	chr17	1303343	1303481	Y	-	5	93	5.91093	13.7945	9.31524	.	.	ALL_AGO|slc5973_chr17|38|2|5|0.40|COORDS=chr17-:1250179	exon	sense	138	GGAGCGAGAGGCTGAGAGAGTCGGAGACACTATCCGCTTCCATCCGTCGCGCAGACCCTGCCGGAGCCGCTGCCGCTATGGATGATCGAGAGGATCTGGTGTACCAGGCGAAGCTGGCCGAGCAGGCTGAGCGATACG	.	RBP	YWHAE	DDX6	.	.	.	-52.3	0.886645	0.999928	0.999942	No	0.275
369	chr17	3599382	3599559	Y	-	9	198	9.84762	24.6699	19.8627	.	.	.	.	sense	177	agaggTAGCGGCAAGGTCGCGGTCTGAGGTTCCGGTGCTCGCCGCCGCCCAGCTCCCAGCCGAGGCTTTCTCAACCGCGTCAATAAAAggccgccccgacccgcccccgcgccccgcAGCCCTGCCGGACACCCCGGGCTGCAGCTGAGCGGGCGCAGACGGGCCGAGGCGGGCGCC	.	Repeats	GC_rich	.	.	.	.	-73.1	0.0360678	0.0719096	0.0775367	No	0.939
370	chr17	4037024	4037132	Y	-	22	601	22.6957	65.4892	60.1704	.	.	.	.	sense	108	gaggtgggaggaccgcttgaacctaggaggtcaaggctgcagtgagctgtgatcacgctactgcactctagcctgggtggtagatgaagaccctgtctcaaaaagaaa	.	Repeats	AluJo	.	.	.	.	-32.7	0.0220833	0.0119537	0.014037	No	0.136
371	chr17	4575557	4575625	Y	-	48	1434	48.1655	149.096	143.406	.	.	.	exon	sense	68	Tgaagaggaggaggaagaggaagaagaggaagaagaagaagaggaagaagaggaagaggaggaagact	.	RBP	PELP1	CPSF6	.	.	.	0	0.834368	0.5125	0.749706	No	1
372	chr17	4849123	4849259	Y	-	6	118	6.89609	16.4617	11.8784	.	Y	.	exon	sense	136	ACGGTGGTTTGATCAACAAGAAATGTTATGAAATGGCCTCCCACCTTCGGCGTTCCCAGTACTGACCTCGTCTGTCCCTTCCCCTTCACCGCTCCCCACAGCTTTGCACCCCTTTCCTCCCCATACACACACAAAC	.	RBP	PFN1	RPS11	.	.	.	-14.9	0.209015	0.735721	0.771353	T655,T33370	0.758
373	chr17	4851562	4851857	Y	-	15	380	15.7842	43.1538	38.0571	.	.	.	exon	sense	295	GGAGCAGGAAGTGGCGGTGCGAGGGCTGCTGCACAGCGAGCGGAGCCGCGGTCCGGACGGCAGCGCGTGCCCCGAGCTCTCCGCCTCCCCCCGCCCGCCAGCCGAGGCAGCTCGAGCCCAGTCCGCGGCCCCAGCAGCAGCGCCGAGAGCAGCCCCAGTAGCAGCGCCATGGCCGGGTGGAACGCCTACATCGACAACCTCATGGCGGACGGGACCTGTCAGGACGCGGCCATCGTGGGCTACAAGGACTCGCCCTCCGTCTGGGCCGCCGTCCCCGGGAAAACGTTCGTCAACA	.	RBP	PFN1	PTBP1	Long RNA	ENO3	.	-131.5	0.897386	0.988098	0.983186	T33214,T654,T655	0.674
374	chr17	5415039	5415213	Y	-	18	453	18.6738	50.49	45.3235	.	.	.	.	sense	174	agagagaaagaagaaagaagagagagaaagaaaaaggaagagaaagaggaagaggaaggaatgaagaaaaagaggaaggaaggaaggaaagagagaaaggaaagagaaagaaagaagaaagagaaagagaaagaaaaagaaaagagaaagggagggagggaaagaaggaaggaC	.	Repeats	T-rich	.	.	.	.	0	0.0169195	0.0135977	0.0151379	No	1
375	chr17	6464214	6464406	Y	+	5	47	5.44664	8.85385	4.74777	.	.	.	Intergenic	sense	192	tcctcttcctccttctcatcctccttctctcctcttcctccttttcctcctcctcccctcttcctcctcttcctcctcccctcttcttcctccttctcttcattctcccctcctcctcctcttcctcctccttctcccttcctcttcctccttctcctcttcattctcccctcctcctcctcttcctcctcc	.	Repeats	CT-rich	.	.	.	.	0	0	0	0	No	1
376	chr17	7143761	7143911	Y	-	7	143	7.87662	19.0524	14.3938	.	.	.	exon	sense	150	TGTCACATCCAGTGATTGTTTTGGTTTCTGTTCCCTTTCTGACTGCCCAAGGGGCTCAGAACCCCAGCAATCCCTTCCTTTCACTACCTTCTTTTTTGGGGGTAGTTGGAAGGGACTGAAATTGTGGGGGGAAGGTAGGAGGCACATCAA	.	RBP	GABARAP	LARP4	.	.	.	-58.3	0.964073	0.825313	0.774233	No	0.001
377	chr17	8280847	8281006	Y	-	21	564	21.6942	61.7756	56.4927	.	.	.	exon	sense	159	TTATCACTAGGCTAAAACTGGACAAAGACCGCAAAAAGATCCTCGAACGGAAAGCCAAATCTCGCCAAGTAGGAAAGGAAAAGGGCAAATACAAGGAAGAAACCATTGAGAAGATGCAGGAATAAAGTAATCTTATATACAAGCTTTGATTAAAACTTG	.	RBP	RPL26	LARP4	Long RNA	RP11-849F2.5	.	-19.1	0.834119	0.831233	0.858484	No	0.661
378	chr17	14608818	14608893	Y	-	10	215	10.79	26.4281	21.5816	.	.	ALL_AGO|slc2299_chr6|53|2|7|0.29|COORDS=chr6+:33347845	pseudogene	sense	75	TCTTCCACAGGAGGCCTACACGCCGCCGCTTGTGCTGCTGCCATGTCTCTAGTGATCCCTGAAAAGTTCCAGCAT	.	RBP	RPS18P12	YBX3	.	.	.	-16.8	0.102493	0.715493	0.925173	No	0.429
379	chr17	16284407	16284500	Y	+	7	147	7.88884	19.4195	14.7016	.	.	.	exon	sense	93	TAGGGGCGGTTGGCTTTGTTGGGTGAGCTTGTTTGTGTCCCTGTGGGTGGACGTGGTTGGTGATTGGCAGGATCCTGGTATCCGCTAACAGGT	.	RBP	UBB	ZRANB2	.	.	.	-29.2	0.00412903	0.0442688	0.0466559	T29368,T4610	0.111
380	chr17	16285247	16286054	Y	+	18	454	18.6827	50.7216	45.4879	.	.	ALL_AGO|slc1048_chr17|45|10|11|0.91|COORDS=chr17+:16226676	exon	sense	807	CGGCAAGACCATCACCCTTGAGGTGGAGCCCAGTGACACCATCGAAAATGTGAAGGCCAAGATCCAGGATAAGGAAGGCATTCCCCCCGACCAGCAGAGGCTCATCTTTGCAGGCAAGCAGCTGGAAGATGGCCGTACTCTTTCTGACTACAACATCCAGAAGGAGTCGACCCTGCACCTGGTCCTGCGTCTGAGAGGTGGTATGCAGATCTTCGTGAAGACCCTGACCGGCAAGACCATCACCCTGGAAGTGGAGCCCAGTGACACCATCGAAAATGTGAAGGCCAAGATCCAGGATAAAGAAGGCATCCCTCCCGACCAGCAGAGGCTCATCTTTGCAGGCAAGCAGCTGGAAGATGGCCGCACTCTTTCTGACTACAACATCCAGAAGGAGTCGAC…	.	Long RNA	UBB	.	Long RNA	RP11-138I1.4	.	-259.5	0.873974	0.929971	0.9499	T29368,T4610,T14780	0.087
381	chr17	16344718	16344869	Y	+	9	155	9.59387	20.3098	15.5751	.	.	.	antisense	sense	151	AGCTGCCATCAGTTTGGATTCTGAAAACTAACTGGCATCAACACTGGGTGTAGAAACATGCTTGCCTTATGTATCAGAGGACATGCTCAGCAGATCCAAGAGATATATTTGGCAACTTTTTCTAGAAAAGGCACATTGGGTATCATTCATT	.	RBP	LRRC75A-AS1	GRWD1	.	.	.	-35.1	0.0235033	0.000960265	0.00107947	No	0.092
382	chr17	16344986	16345241	Y	+	7	134	7.83945	18.1228	13.4637	.	.	ALL_AGO|slc1073_chr17|60|1|11|0.09|COORDS=chr17+:16285889	antisense	sense	255	aagcaatcctcccaccttgtagctgggactacagctcacagcacacctggctaaaattttttttttgttgagacggattctctatgttgcccaggctggtctcaggctcctgggctcagatggtcctcctgcctcagcttccaaagGCACAGGCCAAGTTGTAGCTTTGTCCCTTGCCATCATGCCCAACAAGAGGTTCTATACCTTTTAATGAATTGACTTTCATAAATTGGTTATGTTGGTGGGCAAAGTTCT	.	RBP	LRRC75A-AS1	DDX55	Long RNA	LRRC75A	.	-79.4	0.00882745	0.00876471	0.0095098	No	0.002
383	chr17	17286666	17287378	Y	-	27	691	27.3255	74.5077	69.1374	.	.	.	pseudogene	sense	712	CCTTTCCGCTCGGCTGTTTTCCTGCTCAGGAGCCGCAGGGCCGTAGGCAGCCATGACGCCCAGCCGGAATGGCATGGTCTTGAAGCCCCACTTCCACAAGGACTGGCAGCGGCGCGTGGCCACGTGGTTCAACCAGCCGGCCCGGAAGATCCGCAGACGTAAGGCCCGGCAAGCCAAGGCGCGCCGCATCGCCCCGCGCCCCGCGTCGGGGCCCATCCGGCCCATCGTGTGCTGCCCCACGGTTCGGTACCACACGAAGGTGCGCGCCGGCCGCGGCTTCAATCTGGAGGAGCTCAGGGTGGCCGGCATTCACAAGAAGGTGGCCCGGACCATCGGCATTTCTGTGGATCCGAGGAGGCGGAACAAGTCCACGGAGTCCCTGCAGGCGAACGTGCAGCG…	.	Long RNA	RPL13P12	.	.	.	.	-285.7	0.439588	0.463143	0.827729	No	0.01
384	chr17	19349258	19350189	Y	-	18	363	18.0481	41.3862	36.3083	.	.	ALL_AGO|slc7392_chr17|56|4|9|0.44|COORDS=chr17-:19290736	pseudogene	sense	931	GCTTCTTTTCCGACAAAACACCAAATGGCGGATGACGCCGGTGCAGCGGGGGGGCCCGGAGGCCCTGGTGGCCCTGAGATGGGGAACCGCGGTGGCTTCCGCGGAGGTTTCGGCAGTGGCATCCGGGGCCAGGGTCGCGGCCGTGGACGGGGCCGGGGCCAAGGCCGCGGAGCTCGCGGAGGCAAGGCCGAGGATAAGGAGTGGATGCCCGTCACCAAGTTGGGCCGCTTGGTCAAGGACATGAAGATCAAGTCCCTGGAGGAGATCTATCTCTTCTCCCTGCCCAATTAAGGAATCAGAGATCATTGATTTCTTCCTGGGGGCCTCTCTCAAGGATGAGGTTTTGAAGATTATGCCAGTGCAGAAGCAGACCCGTGCCGGCCAGCGCACCAGGTTCAA…	.	Long RNA	RPS2P46	.	.	.	.	-386.1	0.292068	0.775988	0.95091	T21203	0
385	chr17	19506659	19506727	N	+	7	127	7.80184	17.3768	12.7279	.	.	.	Intergenic	unannotated	68	AGTAAGGTCAGCTAAATAAGCTATCGGGCCCATACCCCAAAAATGTTGGTCATACCCTTCCCATACTA	.	Unannotated	.	.	Unannotated	.	.	-9.7	0	0	0	No	0.246
386	chr17	22025154	22025228	N	+	135	4779	134.11	484.314	477.955	.	.	.	pseudogene	sense	74	GGAGTAAGGTCAGCTAAATAAGCTATCAGGCCCATACCCAGAAAATGTTGGTTATATCCTTCCCGTACTAATCA	.	Long RNA	RP11-846F4.5	.	.	.	.	-12.2	0	0	0	No	0.317
387	chr17	22026337	22026473	N	-	10	233	10.8545	28.2057	23.3212	.	.	.	Intergenic	unannotated	136	GAAGCCAGTTGATTAAGGTATTTAGCTGTTAACCAAATTTTTGTGGGTTTAAGTCCCATTGATCTAGCAAGGGCTTAGCTTAATTAAAGTGGCTGATTTGCGTTCAGTAGATGCAAAGTAGGGTTTTGCAGTCCTT	.	Unannotated	.	.	Unannotated	.	.	-33.6	0	0	0	No	0.112
388	chr17	26794795	26795256	Y	+	11	229	11.7028	27.8327	22.92	.	.	.	pseudogene	sense	461	CTCTTCCTAAGCCGGCGCTCGGCAAGTTCTCCCAGGAGAAAGCCATGTTCAGTTCGAGCGCCAAGATTGTGAAGCCCAATGGCGAGAAGCCGGACGAGTTCGAGTCCGGCATCTCCCAGGCTCTTCTGGAGCTGGAGATGAACTCGGACCTCAAGGCTCAGCTCAGGGAGCTGAATATTACGGCAGCTAAGGAAATTGAAGTTGGTGGTGGTCAGAAAGCTATCATAATCTTTGTTCCCGTTCCTCAACTGAAATCTTTCCAGAAAATCCAAGTCCGGCTAGTACGCGAATTGGAGAAAAAGTTCAGTGGGAAGCATGTCGTCTTTATCGCTCAGAGGAGAATTCTGCCTAAGCCAACTCGAAAAAGCCGTACAAAAAATAAGCAAAAGCGTCCCAGGA…	.	Long RNA	RPS7P1	.	Long RNA	RP11-192H23.4	.	-146.3	0.936436	0.583371	0.899735	No	0.036
389	chr17	27047743	27047877	Y	+	17	415	17.6621	46.7428	41.5485	.	.	.	exon	sense	134	TGAAGCCAAAGCGAAGGCTTTAAAGGCCAAGAAGGCAGTGTTGAAAGGTGTCCACAGCCACAAAAAGAAGAAGATCCGCACGTCACCCACCTTCCGGCGGCCGAAGACACTGCGACTCCGGAGACAGCCCAAAT	.	Long RNA	RPL23A	.	.	.	.	-28.6	0.985858	0.876537	0.94894	T33976,T17663,T25295,T14564,T22670,T14557	0.559
390	chr17	34198499	34198846	Y	-	5	83	5.86738	12.7408	8.31952	.	.	.	.	sense	347	ttgaacccaggaggtggaggctgcagtgagctgagattgtgccacttcactccagcctgggtgacaaagtgagactccgtcacaacaacaacaacaaaaaGCTTCCCCAACTAAAGCCTAGAAGAGCTTCTGAGGCGCTGCTTTGTCAAAAGGAAGTCTCTAGGTTCTGAGCTCTGGCTTTGCCTTGGCTTTGCCAGGGCTCTGTGACCAGGAAGGAAGTCAGCATGCCTCTAGAGGCAAGGAGGGGAGGAACACTGCACTCTTAAGCTTCCGCCGTCTCAACCCCTCACAGGAGCTTACTGGCAAACATGAAAAATCGGCTTACCATTAAAGTTCTCAATGCAACC	.	Repeats	AluSx	.	.	.	.	-110.9	0.139911	0.114556	0.127991	T35897	0.028
391	chr17	34199219	34199441	Y	-	10	195	10.6782	24.3431	19.5401	.	.	.	exon	sense	222	GTGTGCCAACCCAGAGAAGAAATGGGTTCGGGAGTACATCAACTCTTTGGAGATGAGCTAGGATGGAGAGTCCTTGAACCTGAACTTACACAAATTTGCCTGTTTCTGCTTGCTCTTGTCCTAGCTTGGGAGGCTTCCCCTCACTATCCTACCCCACCCGCTCCTTGAAGGGCCCAGATTCTACCACACAGCAGCAGTTACAAAAACCTTCCCCAggctgga	.	Long RNA	CCL5	.	Long RNA	AC015849.2	.	-53.9	0.518626	0.314802	0.282149	T35896	0.707
392	chr17	37006341	37006688	Y	-	21	472	21.2013	52.3942	47.2032	.	.	.	exon	sense	347	TAGAAAAGATGGCGTGTTTCTTTATTTTGAAGATAATGCAGGAGTCATAGTGAACAATAAAGGCGAGATGAAAGGTAGGAAATCAGTCCAGCTTGTTCCTTAGGTCTCTGAGGTTGGGTGGATTGTCTAGAAGTACAGGCCAAGGATCTTCTGTGTTTGACGATGTCTTAATCTGTCCCCCACATGTttttattttattttattttattttTTTAATGCAGGTTCTGCCATTACAGGACCAGTAGCAAAGGAGTGTGCAGACTTGTGGCCCCGGATTGCATCCAATGCTGGCAGCATTGCATGATTCTCCAGTATATTTGTAAAAAATAAAAAAAAAAACTAAACCC	.	RBP	RPL23	PRPF8	.	.	.	-79.9	0.61917	0.468925	0.506931	T14435,T23347,T34162,T1226,T14434,T22476	0.606
393	chr17	37008856	37008958	Y	-	12	246	12.6197	29.5781	24.6743	.	.	.	exon	sense	102	TGAAGGGGATCAAGGGACGGCTGAACAGACTTCCCGCTGCTGGTGTGGGTGACATGGTGATGGCCACAGTCAAGAAAGGCAAACCAGAGCTCAGAAAAAAGG	.	RBP	RPL23	FASTKD2	.	.	.	-23.9	0.979176	0.991696	0.985824	T14435,T23347,T1226,T14434,T22476,T12761	0.377
394	chr17	37359239	37359359	Y	+	24	644	24.5982	69.8701	64.4844	.	.	.	exon	sense	120	AGGTAAGCGGAAGGGTACAGCCAATGCCCGAATGCCAGAGAAGGTCACATGGATGAGGAGAATGAGGATTTTGCGCCGGCTGCTCAGAAGATACCGTGAATCTAAGAAGATCGATCGCCA	.	RBP	RPL19	SRSF7	.	.	.	-23.7	0.409375	0.957567	0.97585	T648,T34187,T33704,T33694,T33928,T33562	0.875
395	chr17	37360777	37360980	Y	+	28	631	27.5981	68.4983	63.1244	.	.	ALL_AGO|slc2647_chr17|54|4|8|0.50|COORDS=chr17+:34614420	exon	sense	203	TGACCAGGCTGAGGCCCGCAGGTCTAAGACCAAGGAAGCACGCAAGCGCCGTGAAGAGCGCCTCCAGGCCAAGAAGGAGGAGATCATCAAGACTTTATCCAAGGAGGAAGAGACCAAGAAATAAAACCTCCCACTTTGTCTGTACATACTGGCCTCTGTGATTACATAGATCAGCCATTAAAATAAAACAAGCCTTAATCTGC	.	RBP	RPL19	FASTKD2	.	.	.	-52.6	0.60435	0.716158	0.68902	T648,T33694,T33928,T33562,T33705	0.025
396	chr17	39845141	39845320	Y	+	10	230	10.8471	27.9684	23.0443	.	.	.	exon	sense	179	AGTCACTGAGCCGCCGCCGAGGATTCAGCAGCCTCCCCCTTGAGCCCCCTCGCTTCCCGACGTTCCGTTCCCCCCTGCCCGCCTTCTCCCGCCACCGCCGCCGCCGCCTTCCGCAGGCCGTTTCCACCGAGGAAAAGGAATCGTATCGTATGTCCGCTATCCAGAACCTCCACTCTTTC	.	RBP	EIF1	SERBP1	.	.	.	-29	0.962106	0.991816	0.987732	T34919	1
397	chr17	39846053	39846193	Y	+	6	109	6.85952	15.5309	10.9701	.	.	.	exon	sense	140	GTGATGACCTGCTTCCTGCTGGCACTGAGGATTATATCCATATAAGAATTCAACAGAGAAACGGCAGGAAGACCCTTACTACTGTCCAAGGGATCGCTGATGATTACGATAAAAAGAAACTAGTGAAGGCGTTTAAGAAA	.	RBP	EIF1	SRSF1	.	.	.	-32.2	0.97815	0.999236	0.999686	T22313,T34919	0.066
398	chr17	39913787	39913887	Y	-	46	1341	46.1028	139.83	134.173	Y	.	.	intron	sense	100	TGGTGAGCTGGGGGAGGGCAGGAGGCTGGGTCCCACTCCCCCAGCCACGATGGAGGCTGGCCGACGTTTAACCTGGCTTTTCCTTTCCTCTCTGCTCAGC	Y	RBP	JUP	XPO5	.	.	.	-47.4	0.18405	0.11368	0.10603	No	0.005
399	chr17	41150780	41150846	Y	+	8	174	8.87494	22.2248	17.4343	.	.	.	exon	sense	66	TGAAACCTGGGAAGGTGGTGCTTGTCCTGGCTGGACGCTACTCCGGACGCAAAGCTGTCATCGTGA	.	RBP	RPL27	SND1	.	.	.	-14.7	0.867924	0.995	0.990152	T1544,T34721,T34614	0.938
400	chr17	41151965	41152091	Y	+	16	394	16.7169	44.6697	39.4954	.	.	ALL_AGO|slc3142_chr17|62|33|169|0.20|COORDS=chr17+:38405616	exon	sense	126	CCTCAGATCGCCCCTACAGCCATGCTCTGGTGGCTGGAATTGACCGCTACCCCCGCAAAGTGACAGCTGCCATGGGCAAGAAGAAGATCGCCAAGAGATCAAAGATAAAATCTTTTGTGAAAGTGT	.	RBP	RPL27	TRA2A	.	.	.	-31.2	0.962198	0.986286	0.972571	T1544,T34721,T34614	0.314
401	chr17	41154687	41154966	Y	+	10	230	10.8471	27.9684	23.0443	.	.	.	exon	sense	279	AGGTACTCTGTGGATATCCCCTTGGACAAAACTGTCGTCAATAAGGATGTCTTCAGAGATCCTGCTCTTAAACGCAAGGCCCGACGGGAGGCCAAGGTCAAGTTTGAAGAGAGGTAAGTAGGCTTTGGTAGTGAATGGTGGAGTATGGTTTCACTATTTCCATTCCTTTCCTCATTGGTGTCCTCTTTTTTTCCCTTCTAGATACAAGACAGGCAAGAACAAGTGGTTCTTCCAGAAACTGCGGTTTTAGATGCTTTGTTTTGATCATTAAAAATTATA	.	RBP	RPL27	TBRG4	.	.	.	-76.8	0.676824	0.612681	0.638616	T1544,T34614	0.059
402	chr17	42327350	42327625	Y	-	5	85	5.87725	12.9461	8.52094	.	.	.	.	sense	275	CCGATGGGGCCCACATTAGGGGGTTTGTTGCACAGTCCCTCCTGTTGCCACACTTTCACTGGGGATCCCGTGCTGGAAGACTTAGATCTGAGCCCTCCCTCTTCCCAGCACAGGCAGGGGTAGAAGCAAAGGCAGGAGGTGGGTGAGCGGGTGGGGtgcttgctgtgtgaccttgggcaagtcccttgacctttccagcctatatttcctcttctgtaaaatgggtatattgatgataatacccacattacaggatggttactgaggaccaaaga	.	Repeats	MIRc	.	.	.	.	-92.5	0.18128	0.21228	0.217335	No	0.253
403	chr17	44411761	44411825	Y	-	13	312	13.786	36.2737	31.2665	.	.	.	.	sense	64	ctgagaagggaaaaaaaaggaaaggaaaggaaaggaaaaaggaaaagggaaaggaaggaaagag	.	Repeats	AluJr4	.	.	.	.	0	0.0462031	0.0008125	0.0013125	No	1
404	chr17	48216634	48216844	Y	-	23	550	23.2979	60.3069	55.036	.	.	ALL_AGO|slc9926_chr17|43|1|9|0.11|COORDS=chr17-:45571682	intron	sense	210	CTGTCCCCTGTGGACATGGAGCCCGAGAAGCTGGTGCACAAGTTCAAGGAGGTGGGAGGAGGGGCTCCCTGGAGTGGTGGAGGGAAAGGCAGGCAGGTCTCCTGCCCTTGGCACTGCCTGCCCCACCCTGCTGGAGCTGAGTGCCTGCCCCTCTGCCCAACAGCTCCAGATCAAGCATGCGGTCACTGAGGCAGAGATCCAGCAGCTGAA	Y	RBP	PPP1R9B	DDX24	Long RNA	AC002401.1	.	-86.4	0.553386	0.530005	0.530152	No	0.094
405	chr17	48823079	48823238	Y	+	74	2230	73.1423	229.044	223.083	.	.	.	exon	sense	159	GGAAAAGTTAAGGAAAAGAACCGAAGAACCTGATCGTGATGAGCGTCTAAAAAAGGAGaagcaagaaagagaagaaagagaaaaagaacgggagagagaaagggaagaaagagaaaggaaaagacgaagggaagaggaagaaagagaaaaagaaagGGC	.	RBP	LUC7L3	RBM15	.	.	.	-5.35	0.758648	0.991182	0.985063	No	0.042
406	chr17	53499044	53499313	Y	-	10	176	10.5243	22.412	17.6474	.	.	.	exon	sense	269	ggagccggggaggcgggaggcgggaggcgggaggTGTTGGGGCCGTTGAAGCGGCCTCCCTCCCGCCcccagccgcccggtctggccccagccctgtcccgacccccggcctggcccactccgaccctacccggccGAAGGGTTCCGCTGGACACGCAGGCGGCCTCCGGAGCAGCCCAAGCCCATGAgggccgcgcgcccggccgccggTGCTGACGAGACGGAGCTCCTGGCCCCCGAGGAGGAGCAGAGGATCAATGCGGTTCAAG	.	RBP	MMD	EIF3D	.	.	.	-142.9	0.870461	0.651327	0.605796	No	0.245
407	chr17	56083722	56083851	Y	-	16	408	16.7613	45.9474	40.8214	.	.	.	exon	sense	129	GATTACGATGGGTACCGTCTGCGGGTGGAGTTTCCTCGAAGCGGCCGTGGAACAGGCCGAGGCGGCGGCGGGGGTGGAGGTGGCGGAGCTCCCCGAGGTCGCTATGGCCCCCCATCCAGGCGGTCTGAA	.	RBP	SRSF1	LARP7	.	.	.	-54.7	0.955434	0.981202	0.944574	T1841,T33914,T34150	0.444
408	chr17	56084327	56084621	Y	-	20	527	20.6883	57.9751	52.7277	.	.	ALL_AGO|slc10358_chr17|41|11|37|0.30|COORDS=chr17-:53439363;ALL_AGO|slc10359_chr17|49|7|9|0.78|COORDS=chr17-:53439398	exon	sense	294	GAGCTGATAAAGGCGCCATTTTGGAGGGGCCGCGGGAGACGTGGTGCCGCTGCGGGCTCGCTCTGCCGTGCGCTAGGCTTGGTGGGAAGGCCTGTTCTCGAGTCCGCGCTTTTCGTCACCGCCATGTCGGGAGGTGGTGTGATTCGTGGCCCCGCAGGGAACAACGATTGCCGCATCTACGTGGGTAACTTACCTCCAGACATCCGAACCAAGGACATTGAGGACGTGTTCTACAAATACGGCGCTATCCGCGACATCGACCTCAAGAATCGCCGCGGGGGACCGCCCTTCGCC	.	RBP	SRSF1	FTO	Long RNA	RP11-159D12.6	.	-109.2	0.984395	0.990735	0.973687	T1841,T34150,T34176	0.93
409	chr17	56429446	56429836	Y	+	9	195	9.83687	24.3695	19.5345	.	.	.	.	sense	390	AAACAGGCCCGCAGATGCCGCAGGTCCTTCGGCACCGTCTCCAGGGCCATCTTCGCCGATGGGAAGAACAACAGGGAGATAGACGACCACAGCCTGTGCACCCGCAGGAAGTAAATAGCTCGTTACCCAGAATGCCCACCACTTCCGGCGCTTAGACTTCCTCTTCCGGTGTGGGCGGACGCCAGCTCCGCCCCTACCCCCGCCAGAGGAGATGGTTTCTCCCGCCAGCAGGCGGGGAGGCTGGGCGGCCGGCCGCCACCTGGGCCGGAGCGCGTCGCAGCCACCTGAGCCCGCCGAGGGCGCGGCGGAGGCTGTGTGGGGTAGTCAgcgggcccccggggcgggggggcggcTGCGCTTGCGCGGGAGTGTGTCGGGCTGAGCCGCAGC	.	Repeats	GC_rich	.	.	.	.	-182.6	0.274977	0.285921	0.284467	No	0.619
410	chr17	59147219	59147357	Y	+	12	278	12.7835	32.8277	27.8333	.	.	.	pseudogene	sense	138	CCTTTTCACAAGATGGCGCCGAAAGCGAAGAAGGAAGCTCCTGCCCCTCCTAAAGCCGAAGCCAAAGCGAAGGCTTTAAAGGCCAAGAAGGCAGTGTTGAAAGGTGTCCACAGCCACAAAAAGAAGAAGATCCGCACG	.	Long RNA	AC005884.1	.	.	.	.	-30.1	0.183109	0.787812	0.978906	T19170	0.376
411	chr17	59668245	59668565	N	-	6	86	6.69725	13.1333	8.69951	.	.	ALL_AGO|slc10645_chr12|47|7|27|0.26|COORDS=chr12-:55393662	pseudogene	sense	320	TTGCTTCCGCGTTCCCTGCACAAAATGCCGGGCGAAGCCACAGAAACCGTCCCTGCTACAGAGCAGGAGTTGCCGCAGTCCCAGGCTGAGACAGGGTCTGGAACAGCATCTGATAGTGGTGAATCAGTACCAGGGATTGAAGAACAGGATTCCACCCAGACCACCACACAAAAAGCCTGGCTGGTGGCAGCAGCTGAAATTGATGAAGAACCAGTCGGTAAAGCAAAACAGAGTCGGAGTGAAAAGAGGGCACGGAAGGCTATGTCCAAACTGGGTCTTCTACAGGTTACAGGAGTTACTAGAGTCACTATCTGGAAATC	.	Long RNA	AC002994.1	.	.	.	.	-95.1	0	0	0	No	0.158
412	chr17	60102067	60102144	Y	-	13	314	13.7922	36.4535	31.4409	.	.	.	intron	sense	77	ttgcctgttctcacttataagtgggagctaaatgatgagaactcatggacacaaagaagggaacaacagacactggg	.	RBP	MED13	EFTUD2	.	.	.	-14.6	0.234221	0.234506	0.279727	No	0.265
413	chr17	62853093	62853156	Y	+	8	167	8.85014	21.5078	16.742	.	.	.	.	sense	63	tgagaagggaaaaaaaaggaaaggaaaggaaaggaaaaaggaaaagggaaaggaaggaaagag	.	Repeats	AluJr4	.	.	.	.	0	0.0284921	0.0140476	0.018381	No	1
414	chr17	65434140	65434232	Y	+	13	303	13.7527	35.3798	30.3408	.	.	.	.	sense	92	gacactgcactccatcctgggcggcagagcgagactctgtctcaaaaaaagaaaaaaagaaaaaaaaagaagagaaaagaaaaaagaaaaac	.	Repeats	AluSz	.	.	.	.	-13	0.0134457	0.0106957	0.0118696	No	0.002
415	chr17	73500561	73500652	Y	-	23	576	23.4523	62.9621	57.6686	Y	Y	ALL_AGO|slc11518_chr17|41|4|31|0.13|COORDS=chr17-:71012218	intron	sense	91	GTAGGATGATGGGGTCACGGACCAGGTCAGGGCTCACTCCCCACTGCCAGTTCCCCAAATGCTGAGTTGGCTCCTGCCCTGTCTCCTCCAG	Y	Long RNA	CASKIN2	.	.	.	.	-32.6	0.165341	0.0946703	0.0919121	No	0.065
416	chr17	73775044	73775225	Y	-	18	474	18.7486	52.6711	47.4706	.	.	ALL_AGO|slc11564_chr17|37|1|5|0.20|COORDS=chr17-:71286697	intron	sense	181	TCCACCGGTGGGAAAGCCCCCCGCAAACAGCTGGCCACGAAAGCCGCCAGGAAAAGCGCTCCCTCTACCGGCGGGGTGAAGAAGCCTCATCGCTACAGGTAGGTCGGGCGGGGGAACAATGGCCCGGCGGTGGCCGGCTTTGTGCGGCAGCGTCCGCTCACTCCTCCCCTGCTCGCTGCAG	Y	RBP	H3F3B	PRPF8	.	.	.	-76.4	0.58095	0.490564	0.576746	T34661,T34319,T34725	0.351
417	chr17	73775742	73775836	Y	-	7	148	7.89416	19.592	14.8933	.	.	.	exon	sense	94	GTTGGGCGGTGCTGGTTTTTCGCTCGTCGACTGCGGCTCTTCCTCGGGCAGCGGAAGCGGCGCGGCGGTCGGAGAAGTGGCCTAAAACTTCGGC	.	RBP	H3F3B	MTPAP	.	.	.	-33.1	0.1925	0.0549468	0.0665106	T34661	0.847
418	chr17	75495565	75495741	N	+	6	110	6.86489	15.6516	11.0844	.	.	.	exon	sense	176	TTGAAAAGGTCTAAGCAAGTGAGTCTGGTGGAGGAGCTGAGGGAGGGAGCCATGGAAGGTGCCAGAAGGAAGGTTGGCGGGGGCACGTGTGGGCCGTGGCTTGGGCTGGTCAGAGTGGCGTGAGCTGCCCGGCGCCTGCCCTGCCCAAGTGACCAGGGAAGTGTGTGTGTGTCCAT	.	RBP	SEPT9	UCHL5	.	.	.	-57.7	0	0	0	No	0.523
419	chr17	79476998	79477557	Y	-	13	314	13.7922	36.4535	31.4409	.	.	.	exon	sense	559	TGTAGAACTTGTTGCTGATTTTGACCTTGTATTGAAGTTAACTGTTCCCCTTGGTATTTGTTTAATACCCTGTACATATCTTTGAGTTCAACCTTTAGTACGTGTGGCTTGGTCACTTCGTGGCTAAGGTAAGAACGTGCTTGTGGAAGACAAGTCTGTGGCTTGGTGAGTCTGTGTGGCCAGCAGCCTCTGATCTGTGCAGGGTATTAACGTGTCAGGGCTGAGTGTTCTGGGATTTCTCTAGAGGCTGGCAAGAACCAGTTGTTTTGTCTTGCGGGTCTGTCAGGGTTGGAAAGTCCAAGCCGTAGGACCCAGTTTCCTTTCTTAGCTGATGTCTTTGGCCAGAACACCGTGGGCTGTTACTTGCTTTGAGTTGGAAGCGGTTTGCATTTACGCCTG…	.	RBP	ACTG1	DHX30	.	.	.	-167.9	0.44817	0.505784	0.577444	No	0.044
420	chr17	79477722	79477828	Y	-	6	98	6.79521	14.3602	9.83407	.	.	.	exon	sense	106	TGTGGATCGGTGGCTCCATCCTGGCCTCACTGTCCACCTTCCAGCAGATGTGGATTAGCAAGCAGGAGTACGACGAGTCGGGCCCCTCCATCGTCCACCGCAAATG	.	RBP	ACTG1	DKC1	.	.	.	-34.1	0.87834	0.938274	0.975802	No	0.258
421	chr17	79478212	79478353	Y	-	5	83	5.86738	12.7408	8.31952	.	.	.	exon	sense	141	GGACTTCGAGCAGGAGATGGCCACCGCCGCATCCTCCTCTTCTCTGGAGAAGAGCTACGAGCTGCCCGATGGCCAGGTCATCACCATTGGCAATGAGCGGTTCCGGTGTCCGGAGGCGCTGTTCCAGCCTTCCTTCCTGGG	.	RBP	ACTG1	UCHL5	.	.	.	-54	0.612809	0.792326	0.964333	T36901	0.21
422	chr17	79478455	79478643	Y	-	11	209	11.5644	25.7833	20.9402	.	.	.	exon	sense	188	GAGACCTTCAACACCCCGGCCATGTACGTGGCCATCCAGGCCGTGCTGTCCCTCTACGCCTCTGGGCGCACCACTGGCATTGTCATGGACTCTGGAGACGGGGTCACCCACACGGTGCCCATCTACGAGGGCTACGCCCTCCCCCACGCCATCCTGCGTCTGGACCTGGCTGGCCGGGACCTGACCGA	.	RBP	ACTG1	LARP7	.	.	.	-73.7	0.836963	0.896468	0.974293	T36901	0.048
423	chr17	79478928	79479292	Y	-	9	200	9.85269	24.8188	20.0044	.	.	ALL_AGO|slc12090_chr17|45|3|9|0.33|COORDS=chr17-:77093852	exon	sense	364	TGTTTCCTTCCATCGTCGGGCGCCCCAGACACCAGGTGAGTGGATGGCGCCGCGGGGCTCCTGGGTTCTGCGTTGCGGGGTGGGTTCGGTGTCGCCGGCGAGGCTGACGGGTCGTCCCCTGCAGGGCGTCATGGTGGGCATGGGCCAGAAGGACTCCTACGTGGGCGACGAGGCCCAGAGCAAGCGTGGCATCCTGACCCTGAAGTACCCCATTGAGCATGGCATCGTCACCAACTGGGACGACATGGAGAAGATCTGGCACCACACCTTCTACAACGAGCTGCGCGTGGCCCCGGAGGAGCACCCAGTGCTGCTGACCGAGGCCCCCCTGAACCCCAAGGCCAACAGAGAGAAGATGACTCAG	.	RBP	ACTG1	XRN2	.	.	.	-144.1	0.373854	0.679863	0.75681	No	0.948
424	chr17	80055520	80055704	Y	+	30	779	30.2321	83.3764	77.9099	.	.	.	intron	antisense	184	TCGGGACCCCTGCGCTTCGGCCGGGCTGCGCCACGTGATGGGGAGGCCGGTCCCGGCGCGGCCCCTGCGCCCCCCCGTTCCTCCCTCGCGGCGTCCCCTTCGGGCTGGGCCTCGGCTCCGGGGCGGCTCCGGGAGGAGGATGCGGCGGCGCCTTTGTGGGCGCGGGGAGGCCGAGCCGGGGGCT	.	Antisense	.	.	RBP	FASN	DROSHA	-116.3	0.0737065	0.00497283	0.0367989	No	0.254
425	chr17	81026405	81026714	Y	-	7	80	7.23668	12.4609	8.06346	.	.	.	Intergenic	sense	309	tgtcgcctcccgggacccccattgtcgcccccgctgtcgcctcccgggacccccgttgtcgccccccgctgtcgcctcccgggacccccattgtcgccccccgctgtcgcctcccgggacccccattgtcgccccccgctgtcgcctccCGGGACCCccgctgccgcccccgctgtcgcctcccgggacccccgctgtcgcccccgctgtcgcctcccgggacccccgttgtcaccgccgctgtcgcctcccgggacccccgttgtcacccccgctgtcgcctcccgggacccccgttgccgcccccgc	.	Repeats	(CGG)n	.	.	.	.	-76.4	0.00430744	0.00427832	0.00440777	No	1
426	chr18	6462107	6462515	Y	-	12	234	12.5281	28.3213	23.4343	.	.	ALL_AGO|slc13034_chr12|60|135|188|0.72|COORDS=chr12-:111328132	pseudogene	sense	408	GAAGCAGCTGGCTAGTGGCTTATTACTTGTGACTGGACCTCTGGTCCTCAATCGAGTTCCTCTACGAAGAACACACCAGAAATTTGTCATTGCCACCTCAACCAAAATCGATATCAGCAATGTAAAAATCCCAAAACATCTTACTGATGCTTACTTCAAGAAGAAGAAGCTGCGGAAGCCCAGACACCAGGAAGGTGAGATCTTCGACACAGAAAAAGAGAAATATGAGATTACGGAGCAGCGCAAGATTGATCAGAAAGCTGTGGACTCACAAATTTTACCAAAAATCAAAGCTATTCCTCAGCTCCAGGGCTACCTGCGATCTGTGTTTGCTCTGACGAATGGAATTTATCCTCACAAATTGGTGTTCTAAATGTCTTAAGAACCTAATTAAATAGC…	.	Long RNA	RPL6P27	.	.	.	.	-97.1	0.74561	0.707123	0.898127	No	0.04
427	chr18	6462814	6463014	Y	-	9	203	9.86422	25.1774	20.3572	.	.	.	pseudogene	sense	200	GCAAGATGGCAGGTGAAAAAGTTGAGAAGCCAGATACTAAAGAGAAGAAACCCGAAGCCAAGAAGGTTGATGCTGGTGGCAAGGTGAAAAAGGGTAACCTCAAAGCTAAAAAGCCCAAGAAGGGGAAGCCCCATTGCAGCCGCAACCCTGTCCTTGTCAGAGGAATTGGCAGGTATTCCCGATCTGCCATGTATTCCAGA	.	Long RNA	RPL6P27	.	.	.	.	-50.4	0.54799	0.372775	0.636465	No	0.117
428	chr18	21033260	21033466	Y	+	5	90	5.9001	13.4913	9.01445	.	.	.	exon	sense	206	GCGGCCGCCGCCGTCGCCGCCATCTGTCACCTCCACTCCGGCATCAGCAGCCAGTCGCCCGTGTCCCGCCTGTCTCCTCGGCGGAGCCTGCTGCCCGTCCTGCCACCTCTCTGCTCTGTTCTTGTCTCTGCCTTCATTCCCGAATGGATCTGGTAGGAGTGGCATCGCCTGAGCCCGGGACGGCAGCGGCCTGGGGACCCAGCAAG	.	RBP	RIOK3	GEMIN5	.	.	.	-72	0.552772	0.44267	0.396549	No	0.918
429	chr18	29993129	29993201	Y	-	6	118	6.89609	16.4617	11.8784	.	.	.	pseudogene	sense	72	GCCTTTCTGCCCGTGGACGCCGCCGAAGAAGCATCGTTAAAGTCTCTCTTCACCCTGCCGTCATGTCTAAGT	.	Long RNA	HNRNPA1P7	.	Long RNA	AC021224.1	.	-7.8	0.539583	0.161083	0.446708	No	0.998
430	chr18	50612538	50612779	Y	+	339	9057	269.316	912.342	905.769	.	.	.	.	sense	241	tcttctcttcttcttcttttcttcttcttcttttcttctttccttcccttcttcttcttccgttcttcttcttcttcttcctttcttcttcttcttcttcttcttcctttcttcttcttcttcttcttcctttcttcttcttcttcttcttcttcctttcttcttcttcttcttcttcttcttcctttcttcttcttcttcttcttcttcctttcttcttcttcttcttcttcctttcttc	.	Repeats	(TTC)n	.	.	.	.	0	0	0	0	No	1
431	chr18	51750480	51750579	N	-	6	121	6.90739	16.8161	12.1984	.	.	.	exon	sense	99	tggcggcggcgCCCCCCGGCGGGAGCCGGTCCCTTTCCCGTCGGGGAGCGCGGGGCCGGGGCCCAGGGGACCCCGGGCCACGGAGAGCGGGAAGAGGAT	.	RBP	MBD2	BUD13	.	.	.	-54.7	0	0	0	No	0.461
432	chr18	66432600	66432668	Y	+	8	167	8.85014	21.5078	16.742	.	.	.	.	sense	68	agaaagaaagaaagaaaagaaagaaagaaaagaaaggaaggaaggaaggaaagagaaagagaaaggaa	.	Repeats	(GAAA)n	.	.	.	.	0	0.00442647	0.00442647	0.00457353	No	1
433	chr18	71815747	71816046	Y	+	6	103	6.82661	14.8784	10.3278	.	.	.	exon	sense	299	GGGGTTTCCCAGGTGACTTTGCGAAGGCATGGCGGGGACACTGTGAATGTCAGCCCAGAAGGTGATCAGAGCCTGTTAATTAAAATGGAAAGAAGACAGAAGGGAAGGTAGACATCAGGTTCTCCCTGGAGACTTTTCGTTTTCATTTACGCTGCGGAAACTGACGTTTTTGCCTAACACCCCATGTAATGTAAACGTATAGGCTTGAGTACGTGTCCGGCCGCATGTGTAGTGAACCCTAAAGCTTTCCTAATTGTAGTTAGCATCGTCCCTAAGCGGAACGATTTTCCGTGAACATG	.	RBP	TIMM21	DDX3X	.	.	.	-79.2	0.0281706	0.0386054	0.0573344	No	0.743
434	chr18	72057229	72057482	Y	-	8	137	8.67327	18.3904	13.7435	.	.	.	pseudogene	sense	253	CCAGGAAATGGTCGCCCAGATCAAGGCTCATGTAGCCTCACTGGAGGGCATTGCCCCGGAAGATCAAGTCGTGCTCCTGGCAGGTGCACCGCTGGAGGATGAGGCCACTCTGGGCCAGTGCGGCGTGGAGGCCTTGACTGCCCTGGAAGTAGCAGGCCGCATGCTTGGAGGTAAAGTCCATGGTTCCCTGGCCCGTGCTGGAAAAGTGAGAGGTCAGACTCCTAAGGTGGCCAAACaggagaagaagaagaag	.	Long RNA	FAUP1	.	.	.	.	-95.3	0.366043	0.292854	0.864648	No	0.106
435	chr19	582954	583440	N	+	5	68	5.75632	11.1131	6.81142	.	.	.	exon	sense	486	AGCCCGGGAGCTGCTGCCCTGCGGCCCCGTCTGTGGCTTTCAGCCTCTGGGTCTGAGTCATGGCCGGGTGGGCGGCACAGCCTTCTCCACTGGCCGGAGTCAGTGCCAGGTCCTTGCCCTTTGTGGAAAGTCACAGGTCACACGAGGGGCCCCGTGTCCTGCCTGTCTGAAGCCAATGCTGTCTGGTTGCGCCATTTTTGTGCTTTTATGTTTAATTTTATGAGGGCCACGGGTCTGTGTTCGACTCAGCCTCAGGGACGACTCTGACCTCTTGGCCACAGAGGACTCACTTGCCCACACCGAGGGCGACCCCGTCACAGCCTCAAGTCACTCCCAAGCCCCCTCCTTGTCTGTGCATCCGGGGGCAGCTCTGGAGGGGGTTTGCTGGGGAACTGGCGC…	.	RBP	BSG	FAM120A	.	.	.	-204	0	0	0	No	0.112
436	chr19	1272581	1272866	Y	+	7	140	7.86524	18.7414	14.0706	.	.	.	exon	sense	285	CCCAGCCTGACCGCTTCTGACGCCGGGATGGCCTCGTTACTAGACTTTTCTTTTTAAGGAAGTGCTGTTTTTTTTTGAGGGTTTTCAAAACATTTTGAAAAGCATTTACTTTTTTGACCACGAGCCATGAGTTTTCAAAAAAATCGGGGGTTGTGTGGGTTTTTGGTTTTTGTTTTAGTTTTTGGTTGCGTTGCCTTTTTTTTTTTAGTGGGGTTGGCCCCATGAAGTGGGTGCCCCACTCACTTCTCTGAGATCGAACGGACTGTGAATCCGCTCTTTGTCGGA	.	RBP	CIRBP	UPF1	.	.	.	-75.1	0.263189	0.275782	0.352544	No	0.251
437	chr19	1274439	1274629	Y	+	7	139	7.861	18.6319	13.9633	.	.	.	intron	sense	190	GTAAGTGCTTTCGGGAAGAGTGGCATGTGGCGCTGAGCCCTGTCCCGGGCGGCACCTGGGCGTTTCAGTGAGTCCTGCTCTCCCGCACCTATGGCCCCATGGCGGGCGCCTTTCGGTGTGTGTTGGGTGCAGGGCAGCGCCTCCCGGGAGCGCCGGGTCCCCCGCCTGGAGCCCGCGCCTGTTCTCCCTC	Y	RBP	CIRBP	PRPF8	.	.	.	-86.4	0.0117579	0.0313	0.0326053	No	0.568
438	chr19	1440028	1440470	Y	+	11	203	11.5127	25.1773	20.3094	.	.	.	exon	sense	442	TGCAGCTGTACAGTGCGCGCCAGCGGCGGCGGCTGAACCGGGGCCTGCGGCGGAAGCAGCACTCCCTGCTGAAGCGCCTGCGCAAGGCCAAGAAGGAGGCGCCGCCCATGGAGAAGCCGGAAGTGGTGAAGACGCACCTGCGGGACATGATCATCCTACCCGAGATGGTGGGCAGCATGGTGGGCGTCTACAACGGCAAGACCTTCAACCAGGTGGAGATCAAGGTGTGTGCGGCCGTCCCTGCCGGCTGGGGTGGGCTGGGGTCGCCTGATGCAGGCGGGATCAGCTGACACCCAGCTTTGCTCTTGGTCTCCCGCAGCCCGAGATGATCGGCCACTACCTGGGCGAGTTCTCCATCACCTACAAGCCCGTAAAGCATGGCCGGCCCGGCATCGGGGC…	.	RBP	RPS15	LIN28B	.	.	.	-186.7	0.275744	0.714321	0.753446	T35002	0.528
439	chr19	2051158	2051242	Y	-	6	116	6.88754	16.2181	11.6508	.	.	.	exon	sense	84	ggctcctctcagcggcggtggcccaggtagaggggtccgcgctggcggcggcggcggcgCTGTTCCCCGCGCGGTCCGCGGAGC	.	RBP	MKNK2	LARP7	.	.	.	-44	0.358119	0.820905	0.82294	No	0.749
440	chr19	2073246	2073343	Y	-	11	262	11.8409	31.1477	26.2209	.	.	.	exon	sense	97	TTGGAGGAGGACGCTCTGGAACCATCATCCCGCTTCTCTCCGGCCTGAGCATCTCAGGGAGACCAGGGGCCGAGCCGCTGAGCAGGTGTTGGTCCTC	.	RBP	MOB3A	UPF1	.	.	.	-35.7	0.00820619	8.24742e-05	0.000113402	T9055	0.405
441	chr19	2269521	2269746	Y	+	24	557	24.1135	61.0703	55.7491	.	.	ALL_AGO|slc361_chr19|50|4|14|0.29|COORDS=chr19+:2220617;ALL_AGO|slc360_chr19|48|4|13|0.31|COORDS=chr19+:2220587;ALL_AGO|slc359_chr19|47|3|6|0.50|COORDS=chr19+:2220552	exon	sense	225	TTGCGAACGGCGAGCAGCGGCGGCGGCGCGGAGAGACGCAGCGGAGGTTTTCCTGGTTTCGGACCCCAGCGGCCGGATGGTGAAATCCTCCCTGCAGCGGATCCTCAATAGCCACTGCTTCGCCAGAGAGAAGGAAGGGGATAAACCCAGCGCCACCATCCACGCCAGCCGCACCATGCCGCTCCTAAGCCTGCACAGCCGCGGCGGCAGCAGCAGTGAGAGGTA	.	RBP	OAZ1	GRWD1,NCBP2	Long RNA	JSRP1	.	-83.4	0.845907	0.968244	0.97188	No	0.551
442	chr19	2271421	2271498	Y	+	169	2010	34.2587	206.921	201.001	.	.	.	exon	sense	77	CGGGGCCTCGGTGGTGCTCCTGATGCCCCTCACCCACCCCTGAAGATCCCAGGTGGGCGAGGGAATAGTCAGAGGGA	.	RBP	OAZ1	LARP4	.	.	.	-32.6	0.991766	0.999208	0.999714	T34573,T33827,T34269	0.101
443	chr19	2271821	2271897	Y	+	12	131	10.4187	17.7718	13.1206	.	.	ALL_AGO|slc367_chr19|75|4|15|0.27|COORDS=chr19+:2222813	exon	sense	76	CAAGACGAGGATTCTCAACGTCCAGTCCAGGCTCACAGACGCCAAACGCATTAACTGGCGAACAGTGCTGAGTGGC	.	RBP	OAZ1	SRSF1,GRWD1	.	.	.	-17.1	0.612776	0.449882	0.822934	No	0.489
444	chr19	2272794	2273331	Y	+	16	337	16.3916	38.8842	33.7881	.	.	ALL_AGO|slc377_chr19|41|4|19|0.21|COORDS=chr19+:2224145;ALL_AGO|slc371_chr19|49|5|5|1.00|COORDS=chr19+:2223762	exon	sense	537	TTCCACAAGAACCGCGAGGACAGAGGTAGGTGACCCGTATCGCCTGCAGTAGGGTGCGTGGGGGTGCCTGCGCCGCCCCTTCATTCTCAGCCCGCAGGCACGGTCTCCCTGCGGGGGTGGGGGGTGCGGGCGGGGGGTTCTGGTCGGCAGGGGTTCTGACGGCTTCTCCCCCGCAGCCGCCTTGCTCCGAACCTTCAGCTTTTTGGGCTTTGAGATTGTGAGACCGGGGCATCCCCTTGTCCCCAAGAGACCCGACGCTTGCTTCATGGCCTACACGTTCGAGAGAGAGTCTTCGGGAGAGGAGGAGGAGTAGGGCCGCCTCGGGGCTGGGCATCCGGCCCCTGGGGCCACCCCTTGTCAGCCGGGTGGGTAGGAACCGTAGACTCGCTCATCTCGCCT…	.	RBP	OAZ1	DDX55	.	.	.	-215.6	0.521451	0.507436	0.536479	T33985	0.021
445	chr19	3053158	3053311	Y	-	7	138	7.8546	18.4731	13.8243	.	.	.	exon	sense	153	TAGTTCCAGACACCTCCACGCCCACCTGGTCCTCTCCCATCGCCCACAAAAGGGGGGGCACGAGGGACGAGCTTAGCTGAGCTGGGAGGAGCAGGGTGAGGGTGGGCGACCCAGGATTCCCCCTCCCCTTCCCAAATAAAGATGAGGGTACTA	.	RBP	AES	DDX3X	Long RNA	AC005944.2	.	-53.1	0.212405	0.164837	0.190111	No	0.135
446	chr19	3053478	3053649	Y	-	5	83	5.86738	12.7408	8.31952	.	.	.	exon	sense	171	TAGCTTTCTTCCTACCCCATTCCCGGCTTCCCTCCTCCTCCCCTGCAGCCTGGTTAGGTGGATACCTGCCCTGACATGTGAGGCAAGCTAAGGCCTGGAGGGTCAGATGGGAGACCAGGTCCCAAGGGAGCAAGACCTCGCGAAGCGCAGCAGCCCCGGCCCTTCCCCCGT	.	RBP	AES	XRN2	Long RNA	AC005944.2	.	-51	0.0317427	0.0373567	0.0819357	No	0.899
447	chr19	3053837	3054167	Y	-	10	214	10.7855	26.3245	21.4786	.	.	.	exon	sense	330	TTGAGAGGGCCAAGCAGGTCACCGCTCCCGAGCTGAACTCTATCATCCGAGTATGTATGGGGACCTGGGCGGGTGGGCGGGGGACAGGTGGGCCCCAGGCAGCTAATGTTCCCCTCCCCCGCCCTGCAGCAGCAGCTCCAAGCCCACCAGCTGTCCCAGCTGCAGGCCCTGGCCCTGCCCTTGACCCCACTACCCGTGGGGCTGCAGCCGCCTTCGCTGCCGGCGGTCAGCGCAGGCACCGGCCTCCTCTCGCTGTCCGCGCTGGGTTCCCAGGCCCACCTCTCCAAGGAAGACAAGAACGGGCACGATGGTGACACCCACCAGGAGGAT	.	RBP	AES	FMR1	.	.	.	-147.1	0.326842	0.630891	0.719542	T34737	0.055
448	chr19	3062248	3062423	Y	-	11	235	11.7348	28.4395	23.5459	.	.	.	exon	sense	175	gcggggaggggcgccgggcgcgcaggaagcggggcccggggcgcgccggggccgggcgcgcggggagggggcgcaggaagcgggcgaggccgggcgcgggaggcggcggcggccccgggagcTGCCGATCGGCGCCGGGACAAAggcgcggccgcccggcgcccccagcagcccg	.	RBP	AES	XPO5	.	.	.	-114.6	0.06148	0.663966	0.634309	No	0.069
449	chr19	3976092	3976723	Y	-	14	307	14.6116	35.7588	30.7573	.	.	.	exon	sense	631	CAACACGGGCGGCCAGGCGTTCCCCCAGTGTGTGTTTGACCACTGGCAGATCCTGCCCGGAGACCCCTTCGACAACAGCAGCCGCCCCAGCCAGGTGGTGGCGGAGACCCGCAAGCGCAAGGGCCTGAAAGAAGGCATCCCTGCCCTGGACAACTTCCTGGACAAATTGTAGGCGGCCCTTCCTGCAGCGCCTGCCGCCCCGGGGACTCGCAGCACCCACAGCACCACGTCCTCGAATTCTCAGACGACACCTGGAGACTGTCCCGACACAGCGACGCTCCCCTGAGAGGTTTCTGGGGCCCGCTGCGTGCCATCACTCAACCATAACACTTGATGCCGTTTCTTTCAATATTTATTTCCAGAGTCCGGAGGCAGCAGACACGCCCTCTTAGTAGGGAC…	.	RBP	EEF2	FASTKD2	.	.	.	-228.1	0.436983	0.351303	0.402133	T5202,T5201	0.155
450	chr19	3977236	3977309	Y	-	8	160	8.81998	20.7791	16.0607	.	.	.	exon	sense	73	TTGAACAGGAAGCGGGGCCACGTGTTCGAGGAGTCCCAGGTGGCCGGCACCCCCATGTTTGTGGTCAAGGCCT	.	RBP	EEF2	DDX6	.	.	.	-22.7	0.41211	0.927438	0.964096	T5201	0.748
451	chr19	3977441	3977596	Y	-	6	117	6.89172	16.3349	11.7656	.	.	ALL_AGO|slc8063_chr19|70|1|7|0.14|COORDS=chr19-:3928577;ALL_AGO|slc8060_chr19|42|2|6|0.33|COORDS=chr19-:3928434	exon	sense	155	GAGGAGAACATGCGGGGTGTGCGCTTCGACGTCCACGACGTCACCCTGCACGCCGACGCCATCCACCGCGGAGGGGGCCAGATCATCCCCACAGCACGGCGCTGCCTCTATGCCAGTGTGCTGACCGCCCAGCCACGCCTCATGGAGCCCATCTA	.	RBP	EEF2	YBX3	.	.	.	-58.9	0.0200387	0.607465	0.875652	T5200	0.212
452	chr19	3978028	3978132	Y	-	13	309	13.7751	35.9659	30.9632	.	.	.	exon	sense	104	TGAAGAGTCGAACGTGCTCTGCCTCTCCAAGTCCCCCAACAAGCACAACCGGCTGTACATGAAGGCGCGGCCCTTCCCCGACGGCCTGGCCGAGGACATCGATA	.	RBP	EEF2	PUM2	.	.	.	-29.1	0.79651	0.894721	0.94749	T35676	0.428
453	chr19	3979848	3980055	Y	-	6	106	6.84528	15.2319	10.6874	.	.	ALL_AGO|slc8073_chr19|50|14|40|0.35|COORDS=chr19-:3930929	exon	sense	207	GATGATGGGCCGCTACGTGGAGCCCATCGAGGATGTGCCTTGTGGGAACATTGTGGGCCTCGTGGGCGTGGACCAGTTCCTGGTGAAGACGGGCACCATCACCACCTTCGAGCACGCGCACAACATGCGGGTGATGAAGTTCAGCGTCAGCCCTGTTGTCAGAGTGGCCGTGGAGGCCAAGAACCCGGCTGACCTGCCCAAGCTGGT	.	RBP	EEF2	AGGF1	.	.	.	-81.4	0.895348	0.916116	0.947676	T5199,T5198	0.275
454	chr19	3981942	3982049	Y	-	10	226	10.8334	27.5511	22.688	.	.	ALL_AGO|slc8081_chr19|50|2|9|0.22|COORDS=chr19-:3932954	exon	sense	107	TACTTTGACCCAGCCAACGGCAAGTTCAGCAAGTCAGCCACCAGCCCCGAAGGGAAGAAGCTGCCACGCACCTTCTGCCAGCTGATCCTGGACCCCATCTTCAAGGT	.	RBP	EEF2	SRSF7	.	.	.	-28.3	0.67086	0.885692	0.918084	T5197,T35488	0.139
455	chr19	3982255	3982423	Y	-	11	249	11.7984	29.895	24.9862	.	.	.	exon	sense	168	GATCGATCCTGTCCTCGGTACCGTGGGCTTTGGGTCTGGCCTCCACGGGTGGGCCTTCACCCTGAAGCAGTTTGCCGAGATGTATGTGGCCAAGTTCGCCGCCAAGGGGGAGGGCCAGTTGGGGCCTGCCGAGCGGGCCAAGAAAGTAGAGGACATGATGAAGAAGCT	.	RBP	EEF2	EFTUD2	.	.	.	-65.7	0.64925	0.870012	0.913673	T5197,T35488	0.242
456	chr19	3982806	3983019	Y	-	7	114	7.70957	16.012	11.4496	.	.	.	exon	sense	213	CAGGCGTGTGCGTGCAGACGGAGACAGTGCTGCGGCAGGCCATTGCCGAGCGCATCAAGCCTGTGCTGATGATGAACAAGATGGACCGCGCCCTGCTGGAGCTGCAGCTGGAGCCCGAGGAGCTCTACCAGACTTTCCAGCGCATCGTGGAGAACGTGAACGTCATCATCTCCACCTACGGCGAGGGCGAGAGCGGCCCCATGGGCAACATCA	.	RBP	EEF2	SRSF1	.	.	.	-82.9	0.671493	0.937178	0.956512	T5196	0.115
457	chr19	3983108	3983256	Y	-	8	165	8.84054	21.2613	16.5346	.	.	ALL_AGO|slc8092_chr19|46|18|51|0.35|COORDS=chr19-:3934253	exon	sense	148	TGACTTGAACTTCATCAAGCAGAGCAAGGACGGTGCCGGCTTCCTCATCAACCTCATTGACTCCCCCGGGCATGTCGACTTCTCCTCGGAGGTGACTGCTGCCCTCCGAGTCACCGATGGCGCATTGGTGGTGGTGGACTGCGTGTCA	.	RBP	EEF2	SERBP1	.	.	.	-47.4	0.215507	0.672142	0.898115	T5195	0.466
458	chr19	5691363	5691448	Y	+	10	208	10.7582	25.7407	20.8691	.	.	ALL_AGO|slc6299_chr14|51|3|8|0.38|COORDS=chr14-:72466129;ALL_AGO|slc762_chr19|63|5|12|0.42|COORDS=chr19+:5642347	exon	sense	85	TGATTCGGGAGGTGTGTGGCTTTGCCCCGTACGAGCGGCGCGCCATGGAGTTACTGAAGGTCTCCAAGGACAAACGGGCCCTCAA	.	RBP	RPL36	DDX3X	.	.	.	-28.3	0.210212	0.953776	0.967529	T8300,T14478,T33723,T33714	0.246
459	chr19	6415312	6415390	Y	-	6	92	6.74587	13.6847	9.22636	Y	.	.	intron	sense	78	GTGAGTGGCCACCATGCGGGGACAGGGGCAGGGGCAGCCCTCACCCACAGCCTCTCACCTGCCTTTGTCCACCCACAG	Y	RBP	KHSRP	PRPF8	.	.	.	-32.3	0.084859	0.112231	0.116615	No	0.032
460	chr19	6708073	6708144	Y	-	19	436	19.4149	48.8166	43.662	.	.	.	.	sense	71	TGAGAAAGAgaaagaaaaagagaaggaaggagagagaaggaaggaaggaaagagaaagagaaaggaaggGC	.	Repeats	CT-rich	.	.	.	.	0	0.00857746	0.00173239	0.0013662	No	1
461	chr19	7426875	7427138	Y	+	11	203	11.5127	25.1773	20.3094	.	.	.	.	sense	263	tggaagaagaagaagaagaagaagaaggagaaggagaaggagaaggagaaggagaaggagaaggagaaggagaaggagaaggagaaggagaaggagaaggagaaggagaaggagaaggagaaggagaaggagaaggagaaggagaaggagaaggagaaggagaaggaggagaagaaggagaagaaggagaagaaggagaagaaggagaagaagaaggagaaaagaagaggaagaagaggaagaagaagacaagaagaggaaga	.	Repeats	(GGAGAA)n	.	.	.	.	0	0.0120342	0.012019	0.0124221	No	1
462	chr19	8386837	8386948	Y	+	6	88	6.71571	13.3318	8.88035	.	.	.	exon	sense	111	TGCGCGTGGAATTCATGGACGACACGAGCCGATCCATCATCCGCAATGTAAAAGGCCCCGTGCGCGAGGGCGACGTGCTCACCCTTTTGGAGTCAGAGCGAGAAGCCCGGA	.	RBP	RPS28	LIN28B	.	.	.	-33.9	0.961	0.937739	0.963045	T20384,T35668,T17106	0.467
463	chr19	8387148	8387277	Y	+	9	184	9.78973	23.2481	18.4397	.	.	.	exon	sense	129	TTTACAGGGTCTTGGATGTCGGGTTCGACCACTTGGCCGATGGGAATGGTCTGTCACAGTCTGCTCCTTTTTTTTGTCCGCCACACGTAACTGAGATGCTCCTTTAAATAAAGCGTTTGTGTTTCAAGT	.	RBP	RPS28	SND1	.	.	.	-26.2	0.151357	0.220977	0.243062	T20384,T35668,T17106,T35789	0.903
464	chr19	8553584	8553725	Y	+	6	113	6.87432	15.8752	11.3016	.	.	.	exon	sense	141	GTACGCCGACATCAAGATGGAGAATGGGAAGTCCAAGGGGTGTGGCGTGGTTAAGTTCGAGTCGCCAGAGGTGGCCGAGAGAGCCTGCCGGATGATGAATGGCATGAAGCTGAGTGGCCGAGAGATTGACGTTCGAATTGA	.	RBP	HNRNPM	SLTM	.	.	.	-44.7	0.738809	0.95656	0.974709	No	0.032
465	chr19	8564341	8564430	Y	+	5	70	5.78612	11.4644	7.08196	.	.	.	intron	antisense	89	TTGGGGAGGTCAGTGACCTCAGGCGGCGGGGGCTTCTTGGGGAGGTCAGTGACCTCAGGCGGCGGGGGCTTCTTGGGGAGGTCAGTGAC	.	Antisense	.	.	Long RNA	PRAM1	.	-37.9	0.133112	0.0289101	0.0439326	No	0.047
466	chr19	8626393	8626599	Y	-	12	291	12.828	34.1442	29.1542	.	.	.	.	sense	206	tagaaaaaaaggaggaaggaaggaaggaaaagggaagggaagaaaggaaagaaggaaagaaaaaatggaaggaaagaaggaaagaaagaagaaagaaagagagaaagaaaaaagagaagagagggagggagggaaggaaggaaggagggagaggaggggagggagggaaagaaagaggaagaaagaagagagaaagagagaagaat	.	Repeats	CT-rich	.	.	.	.	0	0.127644	0.127526	0.128979	No	1
467	chr19	9903384	9903452	Y	+	5	68	5.75632	11.1131	6.81142	.	.	.	.	sense	68	ccgattccccgcctccgtctccCCTCACCGATTcccgcccctgtctctccctcaccgagtccccgccc	.	Repeats	C-rich	.	.	.	.	-1.7	0.0164559	0.0162647	0.89375	No	0.929
468	chr19	11333579	11333670	Y	-	390	14332	379.561	1440.11	1433.24	Y	.	ALL_AGO|slc9015_chr19|39|3|5|0.60|COORDS=chr19-:11194641	intron	sense	91	AGGTAGGAGTGGGCGTGGGCAGGGTGGGCATGGCATGGATGGAAGGCGGAGCAATGTTGACATCACTGATGGCCACCCCTCTCCTGCAGGT	Y	RBP	DOCK6	EFTUD2	.	.	.	-36.8	0.158835	0.121264	0.109363	No	0.013
469	chr19	12754126	12754357	Y	-	40	1170	40.3356	122.646	117.045	.	.	.	pseudogene	sense	231	TGGCCAGGGTTCACATTGGCCAAGTTATCATGTCCATCCGCACCAAGCTGCAGAACAAGGAGCGTGTGATTGAGGCCCTGCGCAGGGCCAAGTTCAAGTTTCCTGGCCGCCAGAAGATCCACATCTCAAAGAAGTGGGGCTTCACCAAGTTCAATGCTGATGAATTTGAAGACATGGTGGCTGAAAAGCGGCTCATCCCAGATGGCTGTGGGGTCAAGTATATCCCCAATC	.	Long RNA	CTD-2192J16.15	.	.	.	.	-81.5	0.942407	0.980848	0.998667	T6405	0.002
470	chr19	12754429	12754774	Y	-	21	546	21.6304	59.9388	54.676	.	.	.	pseudogene	sense	345	CTCTTTCCCTTCAGTGTGCCACTGAAGATCCTGGTGTCGCCATGGGCCGCCGCCCCGCCCGTTGTTACCGGTATTGTAAGAACAAGCCGTACCCAAAGTCTCGCTTCTGCCGAGGTGTCCCTGATGCCAAGATTCGCATTTTTGACCTGGGGCGGAAAAAGGCAAAAGTGGATGAGTTTCCGCTCTGTGGCCACATGGTGTCAGATGAATATGAGCAGCTGTCCTCTGAAGCCCTGGAGGCTGCCCGAATTTGTGCCAATAAGTACATGGTAAAAAGTTGTGGCAAAGATGGCTTCCATATCCGGGTGCGGCTCCACCCCTTCCACGTCATCCGCATCAACAAGA	.	Long RNA	CTD-2192J16.15	.	.	.	.	-111.4	0.764429	0.8658	0.88571	No	0.271
471	chr19	12902297	12902992	Y	+	16	408	16.7638	46.0249	40.8329	.	.	.	exon	sense	695	CTGGGACCTTGAGAGCGGCCAGGCCAGCCTCGGAGCCAGCAGGGAGCTGGGAGCTGGGGGAAACGACGCCAGGAAAGCTATCGCGCCAGAGAGGGCGACGGGGGCTCGGGAAGCCTGACAGGGCTTTTGCGCACAGCTGCCGGCTGGCTGCTACCCGCCCGCGCCAGCCCCCGAGAACGCGCGACCAGGCACCCAGTCCGGTCACCGCAGCGGAGAGCTCGCCGCTCGCTGCAGCGAGGCCCGGAGCGGCCCCGCAGGGACCCTCCCCAGACCGCCTGGGCCGCCCGGATGTGCACTAAAATGGAACAGCCCTTCTACCACGACGACTCATACACAGCTACGGGATACGGCCGGGCCCCTGGTGGCCTCTCTCTACACGACTACAAACTCCTGAAACCG…	.	Long RNA	JUNB	.	Long RNA	HOOK2	.	-304.5	0.639567	0.6734	0.628414	T4669	0.989
472	chr19	12903085	12903344	Y	+	5	94	5.91663	13.9689	9.44617	.	.	.	exon	sense	259	tgggcccgggggcgTCTACGCCGGCCCGGAGCCACCTCCCGTTTACACCAACCTCAGCAGCTACTCCCCAGCCTCTGCGTCCTCGGGAGGCGCCGGGGCTGCCGTCGGGACCGGGAGCTCGTACCCGACGACCACCATCAGCTACCTCCCACACGCGCCGCCCTTCGCCGGTGGCCACCCGGCGCAGCTGGGCTTGGGCCGCGGCGCCTCCACCTTCAAGGAGGAACCGCAGACCGTGCCGGAGGCGCGCAGCCGGGAC	.	RBP	JUNB	RBM15	Long RNA	HOOK2	.	-121	0.882486	0.923402	0.832042	No	0.399
473	chr19	13264372	13264698	Y	+	14	336	14.7502	38.6925	33.6031	.	.	.	exon	sense	326	AGCAGCCTGAGCGACGGCGGGGACGCTGGACTGGTCCCGAGCAAGAAAGCCCGTCTGGAAGAAAAGGAAGAAGAGGAGGGAGCGTCATCCGAAGTCGCCGATCGCCTGCAGCCCCCTCCGGCGCAAGCGGAGGGCGCCTTTCCCAACCTGGCCCGCGTCCTGCAGAGGCGCTTCTCCGGCCTCCTGAACTGCAGCCCCGCGGCCCCTCCGACGGCGCCGCCCGCGTGCGAGGCAAAGCCCGCTTGCCGCCCGGCGGACAGCATGCTCAACGTGCTCGTGCGGGCCGTGGTGGCCTTCTGAGGACCCCGAGCGGCGCTGCCGGAGCC	.	RBP	IER2	TRA2A	Long RNA	CTC-250I14.6	.	-142.8	0.623445	0.557929	0.54704	No	0.974
474	chr19	14728013	14728131	Y	-	25	699	25.656	75.3003	69.9193	.	.	.	Intergenic	sense	118	aaggggaagagagagaggaagagagagagaaagagaaagaacgaaaaagaaaggaaggaaggaagaaagaaaaaagaaaagaaaagagaaaagaaaagaaggaaggaaaagagaGGAC	.	Repeats	T-rich	.	.	.	.	0	0.136559	0.0767797	0.0872119	No	1
475	chr19	15722606	15722864	Y	+	6	103	6.82661	14.8784	10.3278	.	.	.	pseudogene	sense	258	GCCGAAGACACTGCGACTCCGGAGACAGCCCAAATATCCTCGGAAGAGCGCTCCCAGGAGAAACAAGCTTGACCACTATGCTATCATCAAGTTTCCGCTGACCACTGAGTCTGCCATGAAGAAGATAGAAGACAACAACACACTTGTGTTCATTGTGGATGTTAAAGCCAACAAGCACCAGATCAAACAGGCTGTGAAGAAGCTCTATGACATTGATGTGGCCAAGGTCAACACCCTGATTCGGCCTGATGGAGAGAA	.	Long RNA	RPL23AP2	.	Long RNA	AD000091.3	.	-58.7	0.663229	0.902864	0.999539	No	0.649
476	chr19	16436047	16436250	Y	+	10	225	10.8301	27.4571	22.5582	.	.	.	.	sense	203	GAGTCCGGCGGCACCGACGACGACCTCAACAGCGTGCTGGACTTCATCCTGTCCATGGGGCTGGATGGCCTGGGCGCCGAGGCCGCCCCGGAgccgccgccgccgcccccgccgccTGCGTTCTATTACCCCGAACCCGGCGCGCCCCCGCCCTACAGCGCCCCCGCGGGTGGCCTGGTGTCTGAGCTGCTGCGACCCGAGCT	.	Repeats	(CCG)n	.	.	.	.	-85.1	0.433995	0.124778	0.575335	No	0.942
477	chr19	16436431	16436714	Y	+	6	115	6.88344	16.1078	11.5162	.	.	.	.	sense	283	CGAGGTcccgggggccgccccccgccgccgcccgacacaccgccgctcagccccgacggccccgcgcgcctgcccgcgcccggtccgcgcgccTCCTTCCCGCCGCCTTTCGGTGGCCCTGGTTTCGGCGCGCCCGGGCCCGGCCTGCATTACGCGCCGCCTGCGCCCCCAGCCTTCGGTCTCTTCGACGAcgcggccgccgccgcggcagccctgggcctggcgccccccgccgcccgcggTCTCCTCACGCCGCCTGCGTCCCCGCTGGAGCTGCTGGAGG	.	Repeats	GC_rich	.	.	.	.	-135.7	0.340396	0.102226	0.512696	No	0.907
478	chr19	16437825	16438089	Y	+	5	89	5.8969	13.4081	8.95043	.	.	.	.	sense	264	TGAAACGGCACATGTAGCCGGGAcgcccccgcccacctgcgcgcggccgtggcgggtcccacgcgccgggcgcggcccccTCCCAAACTGTGACTGGTATTTATTGGACCCAGAGAACCGGGCCGGGCACAGCGTGGCTACAGAGGGTCTCCCTCGATGACGACGACGACGACGCCACCACCCCAGCCCCCGTCTGTGACTGAAGGCCCGGTGGGAAAAGACCACGATCCTCCTTGACGAGTTTTGTTTTTCAAAATGGTGCAA	.	Repeats	GC_rich	.	.	.	.	-94.2	0.633705	0.5175	0.502746	No	0.853
479	chr19	16438175	16438337	Y	+	7	141	7.87027	18.8754	14.1846	.	.	.	exon	sense	162	TGTACTGTCTGCGGCATTTTTTATAATATTGTATATAGTGACTGACAAATATTGTATTACTGTACATAGAGAGACAGGTGGGCATTTTTGGGCTACCTGGTTCGTTTTTATAAGATTTTGCTGGGTTGGTTTTTTTTTTAATTAAAAAGTTTTGCATCTTTT	.	RBP	KLF2	PUM2	.	.	.	-30.5	0.678704	0.501284	0.585716	T1318	0.168
480	chr19	17316961	17317050	Y	+	10	206	10.7477	25.5334	20.6631	.	.	.	intron	sense	89	GTGGGCGCTGTGGGCAGGTGGGTGCAGTGCCAGGCCCCAGGCACAGCCGTCCTGCCAGTGCGCCGCTCACCAGACCCACCCCACCCACC	Y	Long RNA	MYO9B	.	.	.	.	-43	0.0668315	0.073809	0.0698652	No	0.006
481	chr19	17643663	17643802	Y	+	10	163	10.3846	21.124	16.3793	.	.	.	.	sense	139	TgagggaggaagggagggaaaggggaaagggaaggagggagagagagggcaagaacaggagggaggaagggagAAAGTTATGGGGGCAGAGGTAGGATGGATGGAGGGAGAGAGGAGGAAAAAAAAAGGGAGGGAGAgc	.	Repeats	G-rich	.	.	.	.	0	0.050777	0.0465755	0.0565683	No	1
482	chr19	17972897	17973029	Y	+	41	1173	41.1974	122.992	117.348	.	.	.	exon	sense	132	GGCAGGTGTTTGAGAAGTCCCCCCTGCGGGTGAAGAACTTCGGGATCTGGCTGCGCTATGACTCCCGGAGCGGCACCCACAACATGTACCGGGAATACCGGGACCTGACCACCGCAGGCGCTGTCACCCAGT	.	RBP	RPL18A	ZNF622	.	.	.	-46.5	0.362409	0.873152	0.945394	T35638,T35425,T35601,T35631,T35604,T561	0.407
483	chr19	17973819	17974104	Y	+	9	177	9.75158	22.5086	17.717	.	.	.	exon	sense	285	CTGTCAAGCAGTTCCACGTGAGTGCCCTGGGGGACTCCCCTGGAGGGAAGTGCCTGCTCTGACGCAGGAGCCCAGTGGGGGGCGGCTACACCTTGGTGGCCCCACAGGATGGGGTGTTAAGAGGCTTCCAACCCCCTCAACATGCCTCCCTTCCTCACAGGACTCCAAGATCAAGTTCCCGCTGCCCCACCGGGTCCTGCGCCGTCAGCACAAGCCACGCTTCACCACCAAGAGGCCCAACACCTTCTTCTAGGTGCAGGGCCCTCGTCCGGGTGTGCCCCAAAT	.	RBP	RPL18A	PRPF8	.	.	.	-122.5	0.271323	0.431835	0.428968	T35425,T35601,T35604,T561	0
484	chr19	18392207	18392416	Y	-	8	172	8.8664	21.963	17.2118	.	.	.	exon	sense	209	GGAgggccgggcgctgcggccgcggccggggcgggcgcagggccgagcggacgggggggcgcgggccccccgggaggccgcggccactcccccccgggccggcgcggcgggggAGGCGGAGGATGGAAACACCCTTCTACGGCGATGAGGCGCTGAGCGGCCTGGGCGGCGGCGCCAGTGGCAGCGGCGGCAGCTTCGCGTCCCCGGGC	.	RBP	JUND	FTO	.	.	.	-128.4	0.76122	0.714498	0.651536	No	0.477
485	chr19	18685890	18686049	N	+	9	155	9.59387	20.3098	15.5751	.	.	ALL_AGO|slc2122_chr19|46|3|7|0.43|COORDS=chr19+:18546915;ALL_AGO|slc2121_chr19|48|6|10|0.60|COORDS=chr19+:18546871	exon	sense	159	TGCTGTCAACTGCCGCAAGAAGAAGTGTGGTCACACCAACAACCTGCGTCCCAAGAAGAAGGTCAAATAAGGTGGTTCTTTCCTTGAAGGGCAGCCTCCTGCCCAGGCCCCGTGGCCCTGGAGCCTCAATAAAGTGTCCCTTTCATTGACTGGAGCAGC	.	RBP	UBA52	SRSF7	Long RNA	CRLF1	.	-43.4	0	0	0	No	0.578
486	chr19	21469581	21469727	Y	-	34	982	34.4804	103.788	98.2513	.	.	.	Intergenic	sense	146	aagaagaaagaacaagaaagaaagaaaaggaaggaaggagagagagaaagaaagaagaaagaaaaggagagaaggaaaggaagaaaggagagagaaagaaagagaagcaagaaaaggagagaaggaaaggaagaaaggaaaaggaa	.	Repeats	T-rich	.	.	.	.	0	0.112829	0.112829	0.119849	No	1
487	chr19	23780306	23780392	Y	+	6	120	6.90273	16.6652	12.0326	.	.	.	pseudogene	sense	86	TGTTGGCTGCTCCACTGTCCTCTGCCAGCCTACAGGAGGAAAAGCAAGGCTTACAGAAGGATGTTCCTTCAGGAGGAAGCAGCACT	.	Long RNA	RPS27P29	.	Long RNA	ZNF675	.	-27.8	0.0623721	0.0610233	0.186221	No	0.043
488	chr19	24010432	24010903	Y	+	7	147	7.88884	19.4195	14.7016	.	.	.	pseudogene	sense	471	TGGACATTGCCATCCCATGCAACAACAAGGGAGCTCACTCAGTGGGTTTGATGTGGTGGATGCTGGCTCGGGAAGTTCTGCGCATGCGTGGCACCATTTCCCGTGAACACCCATGGGAGGTCATGCCTGATCTGTACTTCTACAGAGATCCTGAAGAGATTGAAAAAGAAGAGCAGGCTGCTGCTGAGAAGGCAGTGACCAAGGAGGAATTTCAGGGTGAATGGACTGCTCCCTCTCCTGAGTTCACTGCTACTCAGCCTGAGGTTGCAGACTGGTCTGAAGGTGTACAGGTGCCCTCTGTGCCTATTCAGCAATTCCCTACTGAAGACTGGAGCGCTCAGCCTGCCACGGAAGACTGGTCTGCAGCTCCCACTGCTCAGGCCACTGAATGGGTAGGAG…	.	Long RNA	RPSAP58	.	Long RNA	RP11-255H23.4	.	-177.8	0.864446	0.886648	0.900565	No	0
489	chr19	35660510	35660690	N	+	5	86	5.88535	13.1269	8.68607	.	.	.	exon	sense	180	GCAGGTGAGTCCATCAGAAACAGGAGCTGACAACCTGCTGGGCACCCGAAGACCAAGCCCCCTGCCAGCTCACCGTGCCCAGCCTCCTGCATCCCCTCGAAGAGCCTGGCCAGAGAGGGAAGACACAGATGATGAAGCTGGAGCCAGGGCTGCCGGTCCGAGTCTCCTACCTCCCCCAAC	.	RBP	FXYD5	MTPAP	.	.	.	-54.6	0	0	0	No	0.567
490	chr19	36395327	36395513	Y	-	6	118	6.89609	16.4617	11.8784	.	.	.	exon	sense	186	TGTCTACAGCGACCTCAACACACAGAGGCCGTATTACAAATGAGCCCGAATCATGACAGTCAGCAACATGATACCTGGATCCAGCCATTCCTGAAGCCCACCCTGCACCTCATTCCAACTCCTACCGCGATACAGACCCACAGAGTGCCATCCCTGAGAGACCAGACCGCTCCCCAATACTCTCCT	.	Long RNA	TYROBP	.	.	.	.	-25.27	0.256672	0.306844	0.311188	No	0.851
491	chr19	36640833	36641135	N	+	5	82	5.86237	12.6422	8.21971	.	.	.	exon	sense	302	TCTTTGTGGGGCCTGCTGACCCACAAGCTTTTGTTCTCTCAGTACTTGTTACCCAGCTTCTCAACATCCAGGGCCCAATTTGCCCTGCCTGGAGTTCCCCCTGGCTCTAGGACACTCTAACAAGCTCTGTCCACGGGTCTCCCCATTCCCACCAGGCCCTGCACACACCCACTCCGTAACCTCTCCCCTGTACCTGTGCCAAGCCTAGCACTTGTGATGCCTCCATGCCCCGAGGGCCCTCTCTCAGTTCTGGGAGGATGACTCCAGTCCCTGCACGCCCTGGCACACCCTTCACGGTTGCT	.	RBP	CAPNS1	PCBP2	.	.	.	-90.3	0	0	0	No	0.003
492	chr19	39819009	39819142	Y	-	9	195	9.83659	24.3618	19.5579	.	.	.	exon	sense	133	AAGAAAAGTTGTCTTTCTTTCGTTGATCTCTGGGCTGGGGACTGAATTCCTGATGTCTGAGTCCTCAAGGTGACTGGGGACTTGGAACCCCTAGGACCTGAACAACCAAGACTTTAAATAAATTTTAAAATGC	.	RBP	GMFG	LIN28B	.	.	.	-32.5	0.45891	0.283812	0.269925	No	0.173
493	chr19	39923885	39924058	Y	-	33	847	33.0053	90.1935	84.7284	.	.	.	exon	sense	173	ATGTGGATGAGGCTTCCAAGAAGGAGATCAAAGACATCCTCATCCAGTATGACCGGACCCTGCTGGTAGCTGACCCTCGTCGCTGCGAGTCCAAAAAGTTTGGAGGCCCTGGTGCCCGCGCTCGCTACCAGAAATCCTACCGATAAGCCCATCGTGACTCAAAACTCACTTGT	.	RBP	RPS16	AARS	.	.	.	-47.5	0.439225	0.827532	0.845566	T7626,T35562,T35749,T35240,T35727,T1425	0.334
494	chr19	39926249	39926589	Y	-	7	121	7.76596	16.7843	12.1873	.	.	ALL_AGO|slc11577_chr19|39|1|5|0.20|COORDS=chr19-:44618398	exon	sense	340	CCTTTTCCGGTTGCGGCGCCGCGCGGTGAGGTTGTCTAGTCCACGCTCGGAGCCATGCCGTCCAAGGGCCCGCTGCAGTCTGTGCAGGTCTTCGGACGCAAGGTGAGCCAGACGCCGGATGGGAAGGGGAGGGGAAGGAGAAGGCCAGGGTCTGGGAGAGGTCGGTGGGCAGGAATCTAGGGGGTAACATGGGAGCTGGAGCCGGAGCTCACGGGGCCCCTGTTTCTCTTGTATCTTACAGAAGACAGCGACAGCTGTGGCGCACTGCAAACGCGGCAATGGTCTCATCAAGGTGAACGGGCGGCCCCTGGAGATGATTGAGCCGCGCACGCTACAGTAC	.	RBP	RPS16	DHX30	.	.	.	-128.3	0.386912	0.503068	0.50595	T35562,T35749,T7625,T35726	0.97
495	chr19	40913938	40914064	Y	-	6	108	6.85361	15.4034	10.8556	.	.	.	intron	sense	126	GTGAGAGGACAGCTGGGGTGGGGGCCCTTCTCCCCTTCTAATACCCACCCTGCTTTCTCCCTGTAAGCATGGCCTCCACCTCTCGTCCCCTACTGGCCTCAAGCCTCCACTGCTGTCCTCCCACAG	Y	Long RNA	PRX	.	.	.	.	-48.6	0.495508	0.187984	0.190008	No	0
496	chr19	41859456	41859767	N	-	9	182	9.77897	23.0271	18.2434	.	.	.	exon	sense	311	AGACAGCGAgggccccggccgggggcaggggggacgccccgtccggggcacccccccggctctgagccgcccgcggggccggcctcggcccggAGCGGAGGAAGGAGTCGCCGAGGAGCAGCCTGAGGCCCCAGAGTCTGAGACGAGCCGCCGCCGCCCCCGCCACTGCGGggaggagggggaggaggagcgggaggaggGACGAGCTGGTCGGGAGAAGAGGAAAAAAACTTTTGAGACTTTTCCGTTGCCGCTGGGAGCCGGAGGCGCGGGGACCTCTTGGCGCGACGCTGCCCCGCGAGGAGGCAGGA	.	RBP	TGFB1	FTO	RBP	TMEM91	CSTF2T	-155.4	0	0	0	No	0.254
497	chr19	42365191	42365269	Y	+	14	291	14.5087	34.1839	29.1595	.	.	.	exon	sense	78	TGAAAGTCCCCGAATGGGTGGATACCGTCAAGCTGGCCAAGCACAAAGAGCTTGCTCCCTACGATGAGAACTGGTTCT	.	RBP	RPS19	RBM15	.	.	.	-17.2	0.808577	0.978244	0.981346	T35491,T35736,T35506,T546,T35135,T35663	0.652
498	chr19	42373120	42373266	Y	+	7	117	7.73795	16.3805	11.7767	.	Y	.	exon	sense	146	TACCTCCGGGGTGGCGCTGGGGTTGGCTCCATGACCAAGATCTATGGGGGACGTCAGAGAAACGGCGTCATGCCCAGCCACTTCAGCCGAGGCTCCAAGAGTGTGGCCCGCCGGGTCCTCCAAGCCCTGGAGGGGCTGAAAATGGT	.	RBP	RPS19	SUPV3L1	.	.	.	-57.4	0.872329	0.987288	0.991781	T35506,T546,T35663	0.246
499	chr19	42410772	42410854	Y	+	13	292	13.7023	34.2307	29.2057	.	.	.	intron	sense	82	GTGGGGCGGGACGGGCCAGGGGTGCCCTGAGTGGGCTGGGGAAGGAAGGGGCCCCCCTCATCCATGACCCCCACCCCACCAG	Y	RBP	ARHGEF1	LARP4	.	.	.	-37.5	0.147012	0.0792561	0.0944634	T35116	0.341
500	chr19	42463421	42463510	Y	-	9	202	9.8596	25.0304	20.2124	.	.	.	exon	sense	89	gcggggccggcggggTCTTCAGGGTACCGGGCTGGTTACAGCAGCTCTACCCCTCACGACGCAGACATGGCAGCGCAGAAGGACCAGCA	.	RBP	RABAC1	DDX3X	.	.	.	-30	0.319202	0.336742	0.333921	No	0.685
501	chr19	45411822	45412329	Y	+	5	77	5.8339	12.1414	7.74399	.	.	.	exon	sense	507	GGCCTACAAATCGGAACTGGAGGAACAACTGACCCCGGTGGCGGAGGAGACGCGGGCACGGCTGTCCAAGGAGCTGCAGGCGGCGCAGGCCCGGCTGGGCGCGGACATGGAGGACGTGTGCGGCCGCCTGGTGCAGTACCGCGGCGAGGTGCAGGCCATGCTCGGCCAGAGCACCGAGGAGCTGCGGGTGCGCCTCGCCTCCCACCTGCGCAAGCTGCGTAAGCGGCTCCTCCGCGATGCCGATGACCTGCAGAAGCGCCTGGCAGTGTACCAGGCCGGGGCCCGCGAGGGCGCCGAGCGCGGCCTCAGCGCCATCCGCGAGCGCCTGGGGCCCCTGGTGGAACAGGGCCGCGTGCGGGCCGCCACTGTGGGCTCCCTGGCCGGCCAGCCGCTACAGGA…	.	RBP	APOE	RPS5	.	.	.	-277.5	0.547611	0.42831	0.459083	No	0.081
502	chr19	48248830	48248946	Y	+	7	147	7.88884	19.4195	14.7016	.	.	.	exon	sense	116	CAGTGGCGTTGGTGGGAAGCGCAGCTCGAAAAGCGATGCCGATTCTGGTTTCCTGGGGCTGCGGCCCACTTCGGTGGACCCAGCGCTGAGGCGGCGGCGGCGAGGCCCAAGAAATA	.	RBP	GLTSCR2	METAP2	.	.	.	-47.3	0.395034	0.570776	0.577414	No	0.205
503	chr19	48258654	48258755	Y	+	7	126	7.79746	17.2991	12.6627	.	.	.	exon	sense	101	GTTCCGGCTGCGCGGGATCAAGGCCCAGGTGGCCCTGAGGCTGGCGGAGCTggcgcggcggcagaggcggcggcaggcgcggcgggaggcTGAGGCTGACA	.	RBP	GLTSCR2	HNRNPM	.	.	.	-48.6	0.596119	0.657119	0.727683	No	0.224
504	chr19	49118610	49118698	Y	-	7	108	7.654	15.3814	10.8341	.	.	ALL_AGO|slc12659_chr19|57|3|9|0.33|COORDS=chr19-:53810389	exon	sense	88	CGTCCGCTCCAAGGGCCGGAAGTTCGAGCGTGCCAGAGGCCGACGGGCCAGCCGAGGCTACAAAAACTAACCCTGGATCCTACTCTCT	.	RBP	RPL18	SUB1	.	.	.	-24.2	0.797443	0.7745	0.778295	T31067	0.668
505	chr19	49119133	49119461	Y	-	17	380	17.4734	43.1949	38.0946	.	.	ALL_AGO|slc12662_chr19|74|5|18|0.28|COORDS=chr19-:53811149	exon	sense	328	AGGTATGTGCACTGCGCGTGACCAGCCGGGCCCGCAGCCGCATCCTCAGGGCAGGGGGCAAGATCCTCACTTTCGACCAGCTGGCCCTGGACTCCCCTAAGGGCTGTGGCACTGTCCTGCTCTCCGGTGAGTGATACGTGGTCGACGGGTTTGGACTGAGCTGTGTGGCTACTGGCAGCCTTCACCCTCCTGGATCTGGGAGGCCAGAAGCTGGGCGCCAGATCCCTGTCTCACCCGGTTCTCCTTCCCCTTCCCTAGGTCCTCGCAAGGGCCGAGAGGTGTACCGGCATTTCGGCAAGGCCCCAGGAACCCCGCACAGCCACACCAA	.	RBP	RPL18	EFTUD2	.	.	.	-129.1	0.484268	0.595555	0.604576	T31067	0.388
506	chr19	49119980	49120079	Y	-	10	215	10.79	26.4281	21.5816	.	.	.	exon	sense	99	CCGGAAGATGAAGCTTCCTGGCCGGGAAAACAAGACGGCCGTGGTTGTGGGGACCATAACTGATGATGTGCGGGTTCAGGAGGTACCCAAACTGAAGGT	.	RBP	RPL18	DKC1	.	.	.	-30.5	0.610212	0.76403	0.913444	No	0.111
507	chr19	49468564	49469168	Y	+	63	1960	62.9127	201.903	196	.	.	ALL_AGO|slc5660_chr19|58|2|6|0.33|COORDS=chr19+:54160388	exon	sense	604	CGCAGTTCGGCGGTCCCGCGGGTCTGTCTCTTGCTTCAACAGTGTTTGGACGGAACAGATCCGGGGACTCTCTTCCAGCCTCCGACCGCCCTCCGATTTCCTCTCCGCTTGCAACCTCCGGGACCATCTTCTCGGCCATCTCCTGCTTCTGGGACCTGCCAGCACCGTTTTTGTGGTTAGCTCCTTCTTGCCAACCAACCATGAGCTCCCAGATTCGTCAGAATTATTCCACCGACGTGGAGGCAGCCGTCAACAGCCTGGTCAATTTGTACCTGCAGGCCTCCTACACCTACCTCTCTCTGGTGAGTCCCCAGGACGCCCCTGGCCCTAATTTCCTCCAGCTGCGCACCTCCGGCCCTCACTGCACGCGCCAGCCTTCTTTGTGCGGTCGGGTAAACA…	.	Long RNA	FTL	.	.	.	.	-212.4	0.509439	0.545031	0.54705	T6913	0.225
508	chr19	49469536	49470136	Y	+	27	731	27.5148	78.5945	73.1517	.	.	.	exon	sense	600	GAAGCCAGCTGAAGATGAGTGGGGTAAAACCCCAGACGCCATGAAAGCTGCCATGGCCCTGGAGAAAAAGCTGAACCAGGCCCTTTTGGATCTTCATGCCCTGGGTTCTGCCCGCACGGACCCCCATGTACGTACCCGCTGCATCCATGGCTACCCAACCATACCCCTCAAGCCTCTGCTCCCTTTGGGCAAATTTCCTTCAGAGCCTCATTTCACACCTGTCACATTTTAATCTGCAACTGGCTGCTCTCTCCCCCTCTTTTCCAGGGATTGGGTTTCTAATTTCTCCCTCTTCTCTCTCAGCTCTGTGACTTCCTGGAGACTCACTTCCTAGATGAGGAAGTGAAGCTTATCAAGAAGATGGGTGACCACCTGACCAACCTCCACAGGCTGGGTGGC…	.	Long RNA	FTL	.	.	.	.	-181.87	0.381412	0.434653	0.496962	T6913	0.023
509	chr19	49469869	49470128	Y	-	7	131	7.82317	17.781	13.1451	.	.	.	exon	antisense	259	AAAGCTTTATTTCCATTTGGTCCAAGGCTTGTTAGGATAGTTAAGAAAGCTGCCTATTGGCTGGAGGGAGAGGCTTAGGCAGAAGCCCTATTACTTTGCAAGGGGCCCTTCAGAAGTCGCTGGGCTCAGAAGGCTCTTAGTCGTGCTTGAGAGTGAGCCTTTCGAAGAGATACTCGCCCAGCCCAGCCTCCGGGCCACCCAGCCTGTGGAGGTTGGTCAGGTGGTCACCCATCTTCTTGATAAGCTTCACTTCCTCATC	.	Antisense	.	.	RBP	FTL	QKI	-97.2	0.533324	0.487834	0.547618	No	0.002
510	chr19	49841971	49842182	Y	+	7	99	7.55241	14.446	9.91292	.	.	.	exon	sense	211	TGGCACTACCCGCAGGACTGGTTCCAAGTCCTCATCCTGAGAGGTAACGGGTCGGAGGCGCACCGCGTGCCCTGCTCCTGCTACAACTTGTCGGCGACCAACGACTCCACAATCCTAGATAAGGTGATCTTGCCCCAGCTCAGCAGGCTTGGACACCTGGCGCGGTCCAGACACAGTGCAGACATCTGCGCTGTCCCTGCAGAGAGCCACA	.	RBP	CD37	YBX3	RBP	CTC-30107.4	SFPQ	-75.6	0.285611	0.337706	0.3621	No	0.075
511	chr19	49993731	49993835	Y	+	30	798	30.3333	85.3222	79.8464	.	.	ALL_AGO|slc5733_chr19|47|1|9|0.11|COORDS=chr19+:54685517	exon	sense	104	TGAAGTACCTGGCTTTCCTCCGCAAGCGGATGAACACCAACCCTTCCCGAGGCCCCTACCACTTCCGGGCCCCCAGCCGCATCTTCTGGCGGACCGTGCGAGGT	.	RBP	RPL13A	SUB1	.	.	.	-30	0.938875	0.944654	0.96825	T13940,T23967,T22149,T23173,T37919,T23452	0.435
512	chr19	49994689	49995558	Y	+	18	456	18.69	50.9179	45.6814	.	.	ALL_AGO|slc5742_chr19|49|9|31|0.29|COORDS=chr19+:54687309	exon	sense	869	TCTGGGGCGCCTGGCTCACGAGGTTGGCTGGAAGTACCAGGCAGTGACAGCCACCCTGGAGGAGAAGAGGAAAGAGAAAGCCAAGATCCACTACCGGAAGAAGAAACAGCTCATGGTGAGGCCAGGGGCTGGTGCTGAGGGGGGCATCTCACTCCTGGACAGGCCTGGCAGGTGCCTTGCTCACAGAGTACTCTTAACTGGCAAAGGACCAGCCGGGGTTGGGGTGGGATGCAGTCCATGTAATGAGGGCAATGCAACCCCTCCTGACCACCACCACCTGCACTTATTCTTGGCAGAGGCTACGGAAACAGGCCGAGAAGAACGTGGAGAAGAAAATTGACAAATACACAGAGGTCCTCAAGACCCACGGACTCCTGGTCTGAGCCCAATAAAGACTGT…	.	Long RNA	RPL13A	.	.	.	.	-304	0.329038	0.31087	0.310261	T13940,T23967,T23173,T37919,T23452,T22150,T22808,T23035,T24502,T24503	0.024
513	chr19	50001172	50001295	Y	+	13	306	13.7669	35.7451	30.6976	.	.	ALL_AGO|slc7257_chr12|45|4|10|0.40|COORDS=chr12+:131912559	exon	sense	123	GGCGTGGTGACCAAGATGAAGATGCAGAGGACCATTGTCATCCGCCGAGACTATCTGCACTACATCCGCAAGTACAACCGCTTCGAGAAGCGCCACAAGAACATGTCTGTACACCTGTCCCCC	.	RBP	RPS11	SERBP1	.	.	.	-26	0.824886	0.970837	0.989309	T35356,T3080,T35721,T35176,T35567,T35801,T35616,T35539	0.787
514	chr19	50002765	50002945	Y	+	39	1131	39.334	118.77	113.137	.	.	ALL_AGO|slc5753_chr19|44|4|6|0.67|COORDS=chr19+:54694734	exon	sense	180	CAGGGACGTCCAGATCGGTGACATCGTCACAGTGGGCGAGTGCCGGCCTCTGAGCAAGACAGTGCGCTTCAACGTGCTCAAGGTCACCAAGGCTGCCGGCACCAAGAAGCAGTTCCAGAAGTTCTGAGGCTGGACATCGGCCCGCTCCCCACAATGAAATAAAGTTATTTTCTCATTCCC	.	RBP	RPS11	LARP4	.	.	.	-64.9	0.703511	0.775261	0.786633	T3080,T35721,T35176,T35567,T35801,T35616,T35539	0.009
515	chr19	50223033	50223395	N	-	8	156	8.80107	20.3811	15.6659	.	.	.	pseudogene	sense	362	GCTCTTTCTCAGTGAACGGGTCCTGCACTCAGGCGCAGACGGGGAAGCGGAGCCAACATGCCAGTGGCCCGGAGCTGGGTTTGTCACAAAACTTATGTGACCCCGCGGAGACCCTTCGAGAAATCTCGTCTCGACCAAGAGCTGAAGCTGATCGGCGAGTATGGGTTCCGGAACAAACGTGAGGTCTAGAGGGTCAAATTTACCTTGGCCAACATCCGCAAGGCCGCCCGGGAACTGCTGACGCTTGATGAGAAGGACCCACGGCGTCTGTTTGAAGGCAACGTCCTGCTGCGGCGGCTGCTCCGCATTGGGGTGCTGGATGAGGGCAAGACGAAGCTGGATTACATCCTGGGCCTGAAGAT	.	Long RNA	CTB-33G10.1	.	.	.	.	-125.4	0	0	0	No	0.855
516	chr19	51875232	51875480	Y	-	5	81	5.85819	12.5626	8.16357	.	.	.	exon	sense	248	GCTTCCCCTCACTGTTCCCCCCAGGCCACGGCCCGCTTGTCTCAACCACCGCAGCCTTTGCTGCAGGTAAGGACTCTGGACTGGACTGGGGCATCGCGAGCCAGCGAATTCCTGCCGAGGAGCTGAGCCATCTCTCTTGTCCTTGTCCCCAGCCATCTCCATGGTGGTGGCCATGGCGGTGTACACCAGCGAGCGGTGGGACCAGCCTCCACACCCCCAGATCCAGACCTTCTTCTCCTGGTCCTTCT	.	Long RNA	NKG7	.	.	.	.	-88.8	0.198508	0.247395	0.249456	No	0.056
517	chr19	52646268	52646525	N	+	8	174	8.87494	22.2248	17.4343	.	.	.	pseudogene	sense	257	CTCTCTGGTCTTGGCCGCAGAAGCCAGATGACGAAGGGAACGTCATTGTTTGGAAAGCGTCGCAATAAGACGCACACGTTGTGTTGCCGCCGTGGCTCTAAGGCCTACCACCTTCAGAAGTCGACCTGTGGCAAATGTGGCTACGCTGCCAAGCGCAAGAGAAAGTATAACTGGAGTGCCAAGGCTAAAAGACAAAATACCACCGGAACTGGTGGAATGAGGCACCTAAAAATTGTATACCACAGATTCAGGCATGG	.	Long RNA	RPL37P23	.	Long RNA	CTC-471J1.8	.	-75.7	0	0	0	No	0.119
518	chr19	54637714	54637822	Y	+	5	32	4.91753	6.8831	3.28028	.	.	.	Intergenic	sense	108	tccacctcccctctctctctccctccctctccACCTCCCCTCTCTCCACCTCCCCTCACTCCACCTTCCCTctctctccctctctctcctcccctctccctccctcca	.	Repeats	C-rich	.	.	.	.	0	0	0	0	No	1
519	chr19	54705025	54705095	Y	+	9	194	9.83349	24.2792	19.4448	.	.	.	exon	sense	70	AGGCGCAGACGGGGAAGCGGAGCCAACATGCCAGTGGCCCGGAGCTGGGTTTGTCGCAAAACTTATGTGA	.	RBP	RPS9	DDX6	.	.	.	-21.6	0.540714	0.689343	0.7926	No	0.248
520	chr19	54710165	54710325	Y	+	10	202	10.7275	25.1583	20.2936	.	.	.	exon	sense	160	GGTCCGCATTGGGGTGCTGGATGAGGGCAAGATGAAGCTGGATTACATCCTGGGCCTGAAGATAGAGGATTTCTTAGAGAGACGCCTGCAGACCCAGGTCTTCAAGCTGGGCTTGGCCAAGTCCATCCACCACGCTCGCGTGCTGATCCGCCAGCGCCAT	.	RBP	RPS9	SRSF7	.	.	.	-53.8	0.900781	0.971656	0.9866	T4683	0.35
521	chr19	54711300	54711493	Y	+	23	514	23.0253	56.7704	51.4793	.	.	.	exon	sense	193	TTGTCCGCCTGGATTCCCAGAAGCACATCGACTTCTCTCTGCGCTCTCCCTACGGGGGTGGCCGCCCGGGCCGCGTGAAGAGGAAGAATGCCAAGAAGGGCCAGGGTGGGGCTGGGGCTGGAGACGACGAGGAGGAGGATTAAGTCCACCTGTCCCTCCTGGGCTGCTGGATTGTCTCGTTTTCCTGCCAAAT	.	RBP	RPS9	SND1,AGGF1	.	.	.	-72.4	0.681321	0.60001	0.711451	T4683	0.734
522	chr19	55753646	55753743	Y	-	23	563	23.3786	61.6141	56.3325	.	.	ALL_AGO|slc13249_chr19|39|6|17|0.35|COORDS=chr19-:60445528	intron	sense	97	GTGGGTGTGCGGGCAAGGCTAAGGCTGGGGGGAGCTGACTTGGGGAAGCCCTGGGCCCCTGGCCCCTCACCCTGACCCCTGCCCCTGCCCCCGCAGG	Y	RBP	PPP6R1	XRN2	.	.	.	-47.9	0.130948	0.0996186	0.0990619	T34871	0.282
523	chr19	55897773	55898048	Y	+	17	354	17.269	40.5438	35.4233	.	.	ALL_AGO|slc6408_chr19|60|69|87|0.79|COORDS=chr19+:60589761	exon	sense	275	CTGATCAAGAGGAATAAGCAGACCTACAGCACTGTAAGTGGGGCCCGGATGCGTGGCTCCTGCGGGAGGAGGGTCCTGAGTCTCTTGACTCTGGGTCAGAGGGCGGGACCTTCGCATGTCTCCGGGTCCCTTATTCACGATGCCTTGTGCCGCCTCCTTCCCAGGAGCCCAATAACTTGAAGGCCCGCAATTCCTTCCGCTACAACGGACTGATTCACCGCAAGACTGTGGGCGTGGAGCCGGCAGCCGACGGCAAAGGTGTCGTGGTGGTCATT	.	RBP	RPL28	SF3B4	.	.	.	-117.1	0.563633	0.53804	0.575578	T31847,T31699,T8098	0.015
524	chr19	55899322	55899413	Y	+	13	282	13.6532	33.2833	28.2785	.	Y	.	exon	sense	91	TGTGCGGACCACCATCAACAAGAATGCTCGCGCCACGCTCAGCAGCATCAGACACATGATCCGCAAGAACAAGTACCGCCCCGACCTGCGC	.	RBP	RPL28	GRWD1	.	.	.	-17.1	0.717484	0.972407	0.988066	T31847,T31699,T8098,T18110,T31999	0.562
525	chr19	55899647	55899732	Y	+	14	310	14.6285	36.0546	31.0012	.	Y	.	exon	sense	85	AGAAGCCTGTGATGGTGAAGAGGAAGCGGACCCGCCCCACCAAGAGCTCCTGAGCCCCCTGCCCCCAGAGCAATAAAGTCAGCTG	.	RBP	RPL28	IGF2BP2	.	.	.	-15.7	0.7612	0.746212	0.749388	T31847,T31699,T8098,T18110,T31999	0.98
526	chr19	58024256	58024432	Y	-	108	3359	105.811	341.951	335.905	.	.	.	.	sense	176	tcacgtccCTGTTCGGGCGccacttgtggctgtcggttcgggactgaatgaagaaggacaaatgcagaaatgaagacaaaaagatctgttttaaagaaggggtcagagggctccttgcttctagggaacaagggccctgagcttctacagccctttgtatttattaggtagaatcc	.	Repeats	LTR3B_	.	.	.	.	-52.6	0.278091	0.277562	0.282057	No	0.064
527	chr19	58861081	58861180	Y	+	28	722	28.3072	77.6832	72.2472	.	.	.	.	sense	99	TGagagagagagaaagaagaaaaaagaagaaagaaaagagagaaagaaggaaggaagaaagaaagaaggaaagagaaagaaagaaagaggaaggaaggc	.	Repeats	A-rich	.	.	.	.	0	0.0806263	0.0807576	0.228475	No	1
528	chr19	58899505	58899613	Y	+	8	151	8.77707	19.9263	15.1964	.	.	.	exon	sense	108	TGACCGAGTGGGAGACAGCAGCACCAGCGGTGGCAGAGACCCCAGACATCAAGCTCTTTGGGAAGTGGAGCACCGATGATGTGCAGATCAATGACATTTCCCTGCAGG	.	RBP	RPS5	NCBP2,SRSF7	.	.	.	-27.2	0.790852	0.89025	0.962102	T35467	0.826
529	chr19	58905876	58906162	Y	+	6	102	6.81946	14.7527	10.2171	.	.	.	exon	sense	286	TGTGCACAGGCGCTCGTGAGGCTGCCTTCCGGAACATTAAGACCATTGCTGAGTGCCTGGCAGATGAGCTCATCAATGCTGCCAAGGTGGGTGAGGGCACTCCGGTTGGGGGGTCTTAAGTTGGGCATTTGTGGGGGTCCTTCAGAATTCAGAGCTGTGTGTCTCCTTGCAGGGCTCCTCGAACTCCTATGCCATTAAGAAGAAGGACGAGCTGGAGCGTGTGGCCAAGTCCAACCGCTGATTTTCCCAGCTGCTGCCCAATAAACCTGTCTGCCCTTTGGGGCAG	.	RBP	RPS5	UCHL5	.	.	.	-101.7	0.665892	0.579923	0.589524	T35292,T35467	0.527
530	chr2	3665202	3665266	Y	-	13	314	13.7922	36.4535	31.4409	.	.	.	pseudogene	sense	64	GACAAACCCGATATGGCTGAGATCGAGAAATTCGATAAGTCGAAACTGAAGAAGACAGAGACTC	.	Long RNA	AC010907.3	.	Long RNA	COLEC11	.	-7.4	0.855516	0.823937	0.995156	No	0.56
531	chr2	7629009	7629092	Y	-	12	63	6.74724	10.5969	6.38928	.	.	.	Intergenic	sense	83	tcccttcctttctctttccttccctccctccttcctcccttcctttctctttccttccctccctccttcctcccttcctttct	.	Repeats	polypurine	.	.	.	.	0	0	0	0	No	1
532	chr2	10580632	10580771	Y	-	8	145	8.7367	19.2596	14.5847	.	.	.	exon	sense	139	TAGTTTTGAAATGTCTTTGTAAGAGTAGGGTCGCCATGATGCAGCCATATGGAAGACTAGGATATGGGTCACACTTATCTGTGTTCCTATGGAAACTATTTGAATATTTGTTTTATATGGATTTTTATTCACTCTTCAG	.	RBP	ODC1	SUB1	.	.	.	-26.8	0.679036	0.742784	0.847252	T901	0.359
533	chr2	10588246	10588466	Y	-	5	93	5.91189	13.823	9.34287	.	.	.	exon	sense	220	GCCGTGGGGCTTTGTCAGTCCCTCCTGTAgccgccgccgccgccgcccgccgccccTCTGCCAGCAGCTCCGGCGCCACCTCGGGCCGGCGTCTCCGGCGGGCGGGAGCCAGGCGCTGAcgggcgcggcgggggcggccgAGCGCTCCTGCGGCTGCGACTCAGGCTCCGGCGTCTGCGCTTCCCCATGGGGCTGGCCTGCGGCGCCTGGGCGCTCTGAG	.	RBP	ODC1	FTO	.	.	.	-127.3	0.50945	0.531482	0.510823	No	0.615
534	chr2	16839942	16840023	Y	-	22	550	22.4916	60.2762	55.0073	.	.	.	.	sense	81	gaagagaaaagaaaaggaagagaaaaggaagggtggaaggaaaagaaaagaaaaaaaggaaaggaaagaaagggaaagaca	.	Repeats	T-rich	.	.	.	.	0	0.00954321	0.000469136	0.000481481	No	1
535	chr2	21228016	21228155	Y	-	5	93	5.91093	13.7945	9.31524	.	.	.	exon	sense	139	TTGAGATTCCCTCCATTAAGTTCTCTGTACCTGCTGGAATTGTCATTCCTTCCTTTCAAGCACTGACTGCACGCTTTGAGGTAGACTCTCCCGTGTATAATGCCACTTGGAGTGCCAGTTTGAAAAACAAAGCAGATTA	.	RBP	APOB	DDX55	.	.	.	-28.8	0.454683	0.715194	0.660144	T869	0.332
536	chr2	27293347	27293566	Y	-	14	333	14.7397	38.4198	33.3811	.	.	.	exon	sense	219	AAGATGGAGGGTATGAGGGGCCTTCACACTTCACTTCATCCCTTCTACCCATCACAACATACAAAGCAACTACACCTGGATTTTTCCAAACAACTTTTATTTCCTCAGAGTCTTCCTTAATCCTATGGAACAAGAAGCTGCCACTGAATAGGGCCCAGTATAGGGGCTTGCTTTTCTACTCCCTCCCCCCAATATAAAAATATAGACTTTTTTTTGTGG	.	RBP	OST4	FASTKD2	Long RNA	AGBL5	.	-42.9	0.974137	0.991479	0.993484	T18432	0.136
537	chr2	38708917	38709815	Y	+	24	634	24.5584	68.8269	63.4499	.	.	ALL_AGO|slc13442_chr12|44|3|5|0.60|COORDS=chr12-:119120796;ALL_AGO|slc13441_chr12|49|2|10|0.20|COORDS=chr12-:119120763	pseudogene	sense	898	TTCTCTCGCCAGGCATCCTCGTGGAAGTGACATCGTCTTTAAACCCTGCGTGGCAATCCCTGACGCACCGCCGTGATGCCCAGGGAAGACAGGGCGACCTGGAAGTCCAACTACTTCCTTAAGATCATCCAACTATTGGATGATTATCCAAAATGTTTCATCGTGGGAGCAGACAATGTGGGCTCCAAGCAGATGCAGCAGATCCGCATGTCCCTTCGCGGGAAGGTCGTGGTGCTGATGGGCAAGAACACCATGATGCGCAAGGCCATCCGAGGGCACCTGGAAAACAACCCAGCTCTGGAGAAACTGCTGCCTCATATCTGGGGGAATGTGGGCTTTGTGTTCACCAAGGAGGACCTCACTGAGATCAGGGACATGTTGCTGGCCAATAAGGTGCCA…	.	Long RNA	AC011247.2	.	Long RNA	LOC101929596	.	-317.6	0.806379	0.875393	0.956061	No	0.002
538	chr2	42498631	42498846	Y	+	8	170	8.86276	21.8566	17.0847	.	.	.	intron	sense	215	TTGAAGGCTGTCCAATTTTTTAAAATAGAAACTATCCCAACTTCTAAGAACATGTTCTTGACATCCTCTTTCCTTATTTTCAGCGAAGAAAAAAGCCCCAACTGCCTTCTCTGGACATCAAGTATATGACTTCATTAGAGAACGTTCTAATCTTATACGTATTTATTGTGGTTAAAGTCTTTTCATTCAAATTACGCGTATTTTTGCTATACACA	.	Long RNA	EML4	.	.	.	.	-28.2	0.0512186	0.0159721	0.0250093	No	0.646
539	chr2	42499873	42500054	Y	-	6	92	6.74587	13.6847	9.22636	.	.	.	intron	antisense	181	GTTTGAAGGCTGTCCAATTTTTTAAAATAGAAACTATCCCAACTTCTAAGAACATGTTCTTGACATCCTCTTTCCTTATTTTCAGCGAAGAAAAAAGCCCCAGCTGCCTTCTCTGGACATCAAGTATATGACTTCATTAGAGAACGTTCTAATCTTATACGTATTTATTGTGGTTAAAGTC	.	Antisense	.	.	RBP	EML4	SLTM	-26.7	0.204481	0.254547	0.28726	No	0.657
540	chr2	43452581	43452823	Y	-	7	146	7.88694	19.36	14.6831	.	.	.	exon	sense	242	GGCCGCCGCCCCCAGCTCGGGCTTCGCGCCGGGATTCCTCCGACGGCACTCGGCCAGCAACCTGCATGCACTCGCCCACCCCGCGCCCAGCCCCGGCAGCTGCTCGCCCAAGTTCCCGGGCGCCGCTAACGGCAGCAGCTGCGGCAGCGCGGCGGCCGGCGGTCCGACCTCCTACGGCACCCTTAAGGAGCCGTCGGGGGGCGGCGGCACAGCCCTGCTCAACAAGGAGAACAAATTCCGGG	.	RBP	ZFP36L2	EIF4G2	.	.	.	-119.1	0.701442	0.900409	0.825293	T3540	0.039
541	chr2	43453465	43453745	Y	-	7	131	7.82317	17.781	13.1451	.	.	.	exon	sense	280	GAGTTCCAGCAGTCCGCGAGCTGCCGTCGGCTccgcggggggggcgggccgggcaccccggggcgcggAGGAGCGCTCCTCGCTTCTCTCCTTCCCCCCTGCCGCACTCCGCCGGACCCTCCCGCCGGCCCGCGCCGCTGCACTCGCCCTCTCCTCTCGCCCCCCGGCAAACTTTCGGCCCCTCCCCGCCCCTCGCCCGTTATTCGTCGTGGCTCAAGCCCGGCCACGCCGCCCCAAGGGCTCCTCCCGACCTCCCGGCCTGCCGCTCCGGCCACTGCGG	.	RBP	ZFP36L2	ILF3	.	.	.	-126.3	0.376614	0.580432	0.505096	No	0.081
542	chr2	47917840	47918006	Y	-	14	324	14.7	37.4771	32.4467	.	.	.	pseudogene	sense	166	TGAAGGTGGAGGAGATCGCGGCCAGCAAGTGCCGCCGGCCGGCTGTCAAGCAGTTCCACGACTCCAAGATCAAGTTCCCGCTGCCCCACCGGGTCCTGCGCCGTCAGCACAAGCCACGCTTCACCACCAAGAGGCCCAACACCTTCTTCTAGGTGCAGGGCCCTCG	.	RBP	AC079250.1	YBX3	.	.	.	-60.6	0.168355	0.391548	0.970494	No	0.142
543	chr2	47918088	47918169	Y	-	6	92	6.74587	13.6847	9.22636	.	.	.	pseudogene	sense	81	TTGCGGGTGAAGAACTTCGGGATCTGGCTGCGCTATGACTCCCGGAGCGGCACCCACAACATGTACCGGGAATACCGGGAC	.	RBP	AC079250.1	PUS1	.	.	.	-34.4	0.0315432	0.0523827	0.999852	No	0.007
544	chr2	48576249	48576378	Y	+	9	155	9.59387	20.3098	15.5751	.	.	.	.	sense	129	TGCCAGGAACCatctcaccactgcattccagcctgggagatagagggagactctgtctcacaaaacaaaacgaaaaaCATTGGATTCAACTTTggctgagtgcagtggctcacacctgtaatcccagca	.	Repeats	AluSz6	.	.	.	.	-41.2	0.0915426	0.0841395	0.0968682	No	0
545	chr2	48576929	48577016	Y	+	12	269	12.7453	31.8944	26.9136	.	.	.	.	sense	87	TCCATCCTGTGACGTGAGATGTAacatatgaactcttacctttgacagagcacagaaatggcagtcgtaaaagaatgtaagaaaaag	.	Repeats	L1MCc	.	.	.	.	-12.3	0.212126	0.21177	0.23446	No	0.546
546	chr2	55461972	55462087	Y	+	9	194	9.83349	24.2792	19.4448	.	.	.	exon	sense	115	ACTCTTCATCTTGTGTTGAGACTTCGTGGTGGTGCTAAGAAAAGGAAGAAGAAGTCTTACACCACTCCCAAGAAGAATAAGCACAAGAGAAAGAAGGTTAAGCTGGCTGTCCTGA	.	RBP	RPS27A	CPSF6	.	.	.	-33.7	0.995165	0.996157	0.990365	T20395,T15765,T25255,T3143	0.001
547	chr2	55462583	55462738	Y	+	11	229	11.7028	27.8327	22.92	.	.	.	exon	sense	155	TAGTCGCCTTCGTCGAGAGTGCCCTTCTGATGAATGTGGTGCTGGGGTGTTTATGGCAAGTCACTTTGACAGACATTATTGTGGCAAATGTTGTCTGACTTACTGTTTCAACAAACCAGAAGACAAGTAACTGTATGAGTTAATAAAAGACATGA	.	RBP	RPS27A	CPSF6	.	.	.	-36.2	0.84229	0.900929	0.916671	T15765,T25255,T3143	0.335
548	chr2	63125861	63125930	Y	+	16	408	16.7638	46.0249	40.8329	.	.	.	.	sense	69	cgaaaggaaaagaaagagggagagaaggaaggaaggaaaagagagaaggaagaggggagaaaagaggat	.	Repeats	GA-rich	.	.	.	.	0	0.0149565	0.00307246	0.00331884	No	1
549	chr2	63911645	63911842	N	+	6	112	6.87297	15.8422	11.269	.	.	.	pseudogene	sense	197	TCTTTTGTGAGAGTTTATAACTATAATCACCTAATGCCCACAAGGTACTCTGTGGATATCCCCTTGAACAAAACTGTCATCAGTAAGGATGTCTTCAGAGATCCTGCTCTTAAACGCAAGGCCTGACGAGAGGTCAAGGTCAAGTTTGAAGAGAGATACAAGATAGGCAAGAACAAGTGGTTCTTCCAGAAGCTGCG	.	Long RNA	AC096664.1	.	Long RNA	WDPCP	.	-52.8	0	0	0	No	0.029
550	chr2	64436776	64436948	Y	-	21	558	21.6734	61.1395	55.8606	.	.	.	.	sense	172	aagaagagagagagagagaaagaaagaaaaagaaagaaagaagaaaaagaaagaaggaaggaaggaaagaaaaagaaagaaagaaagaaagaacgaaagaaagaaagaaagaaagaaagaaagaaagaaagaaagaaagaaagaaagaaagaaagaaagagaaagaaagaaa	.	Repeats	(TTTC)n	.	.	.	.	0	0.0770465	0.0300407	0.0335465	No	1
551	chr2	68479476	68479657	Y	-	8	176	8.88093	22.4189	17.6474	.	.	.	exon	sense	181	GAGGTTGCGGGTCAGCGCGAGCCGCTGCAGTGAGTCCGTCACGGCTCCGGCGCGAGCGCGAGGCTGCAGCCCCCGAGTTTCCCGGCCGTCTTCGCCCCCTCTCCCCCTCCTTTCTTCTTCTCTGCCTCTCCTGCCTCTCGCCGCTGCTCCTCCCGCGCTCTCCGGCTCTGAATCTCGACCT	.	RBP	PPP3R1	DDX3X	.	.	.	-59.9	0.166088	0.442602	0.45463	No	0.366
552	chr2	70025947	70026130	Y	-	10	220	10.8081	26.8665	22.0174	.	.	.	.	sense	183	agcaacctgctcgggacccctctctgtgactgtgagctgttctgttcttttgcctattaaactcctgctccaaactcactcgatgtgtgtgtgcatgtccttgacctcaatatctggtcgtgtgaccaagaacctcagtattcaccccagacaacaaggctgcttcaTTTTGAGGGCTCGTCT	.	Repeats	LTR19C	.	.	.	.	-37.1	0.0975628	0.0971858	0.114885	No	0.742
553	chr2	70314607	70314824	Y	+	9	202	9.86105	25.0759	20.2203	.	.	ALL_AGO|slc3011_chr2|49|2|5|0.40|COORDS=chr2+:70168320	exon	sense	217	CAGACCGCCGAGGCTGCCGCCGGAGTCGCCACCGCCGcgccctcgcccacccgcccgcccgccgctcccggccccgctcgccccctccgccgccgccgcccgcccctgcGACTACGCTGCGGCCTCCCGCCCGCTCCCGCTCGCTCCCGCGGCCCTCGCTCGCCTCGCGCCGGCAGTTTTGGGCCTACACCTCCCCTCCCCCCGCCAGCCGCCAAAG	.	RBP	PCBP1	SERBP1	RBP	AC136007.2	FAM120A	-64.8	0.832926	0.757885	0.774493	No	0.99
554	chr2	70314944	70315546	Y	+	15	373	15.7638	42.516	37.3673	.	.	ALL_AGO|slc3016_chr2|47|4|11|0.36|COORDS=chr2+:70168619;ALL_AGO|slc3017_chr2|46|4|5|0.80|COORDS=chr2+:70168906;ALL_AGO|slc3015_chr2|76|4|14|0.29|COORDS=chr2+:70168574;ALL_AGO|slc3019_chr2|53|19|78|0.24|COORDS=chr2+:70169050	exon	sense	602	GAAGTAGGAAGCATCATTGGGAAGAAAGGGGAGTCGGTTAAGAGGATCCGCGAGGAGAGTGGCGCGCGGATCAACATCTCGGAGGGGAATTGTCCGGAGAGAATCATCACTCTGACCGGCCCCACCAATGCCATCTTTAAGGCTTTCGCTATGATCATCGACAAGCTGGAGGAAGATATCAACAGCTCCATGACCAACAGTACCGCGGCCAGCAGGCCCCCGGTCACCCTGAGGCTGGTGGTGCCGGCCACCCAGTGCGGCTCCCTGATTGGGAAAGGCGGGTGTAAGATCAAAGAGATCCGCGAGAGTACGGGGGCGCAGGTCCAGGTGGCGGGGGATATGCTGCCCAACTCCACCGAGCGGGCCATCACCATCGCTGGCGTGCCGCAGTCTGTCACC…	.	Long RNA	PCBP1	.	Long RNA	AC136007.2	.	-233.4	0.917128	0.974862	0.981615	T4743,T4744	0.306
555	chr2	72211283	72211529	N	-	5	95	5.92062	14.0983	9.58091	.	.	.	pseudogene	sense	246	GAATCTCAAAGTGAAAGGACCAGTTTGAATGCCTACCAAGACTTTGAGAATCACTACAAGAAAAACTCCTTGTGGTGAAGGTTCTAAGACATGGGATCGTTTCCAGATGAGACTCCACAAGCGACTCATTGATTTGCACGGTCCTTCTGAGATTGTTAAGCAGATTACTTCCATCAGTACTGAGCCAGGAGTTGAGGTGGAAGTCATCATTGCAGATGCTTAAGTCAACTATTTTAATAAATTGAT	.	Long RNA	AC067950.1	.	.	.	.	-64.5	0	0	0	No	0.027
556	chr2	78019913	78020172	N	+	7	127	7.80184	17.3768	12.7279	.	.	.	pseudogene	sense	259	GGTCCGTGCCAGCTCCCAGTTCGCCTCGTCGCCATGCCTCGGAAAATTGAGGAAATCAAGGATTTTCTGCTCACAGTCCGATGAAAGGATGCCAAATCCGTCAAGATCAAGAAAAATAAGGACAATGTGAAGTTTAAAGTTTGACACAGCAAATACCTTTACACCCTGGTCATCACTGACAAAGAGAAGGCAGATAAACTGTAGTCCCTGCCCCCTGGTTTGGCAGTGAAGGAACTAAAATGAACCAGACACACTGATT	.	RBP	AC105399.2	PUM2	Long RNA	LOC101927967	.	-56.1	0	0	0	No	0.588
557	chr2	85133519	85133795	Y	+	16	388	16.6915	44.0239	38.8606	.	.	.	exon	sense	276	GCAGGAGAAGCGGAGTGAAATTTCCTAAGATCCTGGAGGATTTCCTACCCCCGTCCTCTTCGAGACCCCAGTCGTGATGTGGAGGAAGAGCCACCTGCAAGATGGACACGAGCCACAAGCTGCACTGTGAACCTGGGCACTCCGCGCCGATGCCACCGGCCTGTGGGTCTCTGAAGGGACCCCCCCCCAATCGGACTGCCAAATTCTCCGGTTTGCCCCGGGATATTATAGAAAATTATTTGTATGAATAATGAAAATAAAACACACCTCGTGGCA	.	RBP	TMSB10	UPF1	Long RNA	TRABD2A	.	-77.3	0.860862	0.837025	0.845931	T855	0.652
558	chr2	88480904	88481020	Y	+	7	46	5.97615	8.49796	4.61252	.	.	.	.	sense	116	ctctcctctctctctcctctctctctcctctctctctcctctctctcctctctctctcctctctcctctctctctcctctctctcccctctctctcccctctctctctctcctctc	.	Repeats	(TC)n	.	.	.	.	0	0	0	0	No	1
559	chr2	97529532	97529662	Y	-	15	350	15.6683	40.1178	35.0552	.	.	.	intron	sense	130	GTGGGTGCATGGGTATGCAGGCATGGCTGCTCAAGGCTGGGCAGAAGCCCGTGTGCCCAGGGCAGGGAGATTTGGAGCTGCCCCACGGCCTTGTGCCCTCTCATTTACACCTTCTCCTCTGCACCCCCCA	Y	RBP	SEMA4C	LIN28B	.	.	.	-53.5	0.0499	0.0306923	0.0387769	No	0.052
560	chr2	99113055	99113195	Y	+	10	214	10.7866	26.3503	21.4688	.	.	.	.	sense	140	ttgaagaaaatatttgcaaactatacattagacaaggggttaacatcagaaacatacaaggaactcaaacaactcaattgcaggaaacaatccaatttaaaaatgggcaaaagacctgaatagacatttcccaaaagaag	.	Repeats	L1M4b	.	.	.	.	-8.7	0.21275	0.211064	0.253314	No	0.923
561	chr2	100546977	100547048	Y	-	61	1590	58.8939	164.748	159.021	.	.	.	.	sense	71	Tgagagaaagagaaagagggagagaaggagggaagaaagaggagagagagaaaaagaaagggaggaggagc	.	Repeats	CT-rich	.	.	.	.	0	0.0853099	0.00198592	0.00226761	No	1
562	chr2	101619164	101619262	Y	+	15	317	15.4759	36.8584	31.7893	.	.	.	exon	sense	98	TGGCTCCCGCAAAGAAGGGTGGCGAGAAGAAAAAGGGCCGTTCTGCCATCAACGAAGTGGTAACCCGAGAATACACCATCAACATTCACAAGCGCATC	.	RBP	RPL31	ZNF622	.	.	.	-16.7	0.9875	0.989276	0.988071	T16270	0.838
563	chr2	102968949	102969109	Y	-	10	233	10.8545	28.2057	23.3212	.	.	.	.	sense	160	attatataattaataattatatataaaatatatattatattatatataaaaatattatatataaaatattatatattaaataatattatttttatatgttatatattatacattattagatattctatattatattttatataattatatataattatat	.	Repeats	(TATAA)n	.	.	.	.	-27.5	0.188256	0.0033875	0.00398125	No	0.007
564	chr2	106498147	106498453	Y	+	5	68	5.75632	11.1131	6.81142	.	.	.	exon	sense	306	GCATGTGGTCCAGACGCTGTACCCCTTCAGCTCAGTCACCGAGGAGGAGCTCAACTTCGAGAAGGGGGAGACCATGGAGGTGATTGAGAAGCCGGAGAACGACCCCGAGTGGTGGAAATGCAAAAATGCCCGGGGCCAGGTGGGCCTCGTCCCCAAAAACTACGTGGTGGTCCTCAGTGACGGGCCTGCCCTGCACCCTGCGCACGCCCCACAGATAAGCTACACCGGGCCCTCGTCCAGCGGGCGCTTCGCGGGCAGAGAGTGGTACTACGGGAACGTGACGCGGCACCAGGCCGAGTGCGCCCT	.	RBP	NCK2	SLTM	.	.	.	-111.8	0.965056	0.88883	0.904624	No	0.957
565	chr2	107314172	107314301	Y	-	5	95	5.92062	14.0983	9.58091	.	.	.	pseudogene	sense	129	TCGAAATGCACCATGAAGCTTTGAGTGAAGCTCTTCCTGGGGACAATGTGGGCTTCAATGTCAAGAATGTGTCTGTCAAGGATGTTCGTCATGGCAACGTTGCTGGTGACAGCAAAAATGACCCACCAA	.	Long RNA	AC096663.1	.	.	.	.	-31.6	0.165589	0.626977	0.998667	No	0.429
566	chr2	113963112	113963222	Y	+	46	1342	46.1087	139.967	134.248	.	.	.	.	sense	110	aggagaatggcttgaacccaggaggcggaggttgcagtgagctgaggttgcgccattgcactccagcctgggtaacagagcgagactctgtcgaaaaagaaaaaaaagat	.	Repeats	AluSx	.	.	.	.	-37	0.0405545	0.0444364	0.0521182	No	0
567	chr2	125438494	125438563	N	-	5	92	5.90885	13.7335	9.27204	.	.	.	intron	antisense	69	AAGGATTAGAGTCATCCACTGGTCTTAGGAAGCAAAAATATTGGTGCAACTCCAAATAAAAGTTACAAA	.	Antisense	.	.	Long RNA	CNTNAP5	.	-8.8	0	0	0	No	0.261
568	chr2	132021403	132021552	Y	+	9	164	9.66682	21.1994	16.4537	.	.	.	exon	sense	149	CGAGCTGCGTGTGGCTCCCGAGGAGCACCCCATCCTGCTGACCGAGGCCCCCCTGAACCCCAAGGCCAACCGCGAGAAGATGACCCAGATCATGTTTGAGACCTTCAACACCCCAGCCATGTACGTGGCCATCCAGGCCGTGCCGTCCC	.	RBP	PLEKHB2	DDX24	.	.	.	-34.5	0.252752	0.249477	0.999966	No	0.995
569	chr2	143642728	143642826	Y	+	20	479	20.4798	53.2177	47.9593	.	.	.	.	sense	98	tggccTATTTTCTTCTTTTCATATATGAGAAAAACTCATGCATGGAGTTTAATGCTGGTTGGTTAAGTATATTATTCCTGAGGTTGGGAAAAGGGAGT	.	Repeats	AluSx1	.	.	.	.	-19.5	0.0509898	0.00323469	0.0022551	No	0.236
570	chr2	156120524	156120596	N	+	5	94	5.91663	13.9689	9.44617	.	.	.	Intergenic	unannotated	72	AAGGGTTTAGCTTAATTAAAGTGGCTGATTTGCGTTCAGTTGATGCAGAGTAGGGTTTTGCAGTCCTTAGGT	.	Unannotated	.	.	Unannotated	.	.	-13.6	0	0	0	No	0.428
571	chr2	160638100	160638161	Y	+	33	958	33.5276	101.412	95.8468	.	.	.	.	sense	61	ATGaaaagagagagaaagaaagaaaagaggaagaagaaaaaggaagaaaggaaagaaaATA	.	Repeats	A-rich	.	.	.	.	0	0.0015082	0.002	0.00234426	No	1
572	chr2	164607744	164607808	Y	-	18	465	18.7179	51.708	46.5198	.	.	.	.	sense	64	cgttcatgcctgtgaatagccactgcgctacatcttgggcaatatagcgagactccgtctctaa	.	Repeats	FAM	.	.	.	.	-16.3	0.0048125	0.00176563	0.00195312	No	0.091
573	chr2	172373779	172374249	Y	-	10	202	10.7251	25.1148	20.2959	.	.	.	pseudogene	sense	470	TGCTCTTCTGAGGATCCGGCAAGATGGCAGAAGTAGAGCAGAAGAAGAAGCGGACCTTCCGCAAGTTCACCTACCGCGGCGTGGACCTGGACCAGCTGCTGGACATGTCCTACGAGCAGCTGGAGCAGCCGATGCAGCTGTACAGTGCGCGCCAGCGGCGGCGGCTGAACCGGGGCCTGCGGCGGAAGCAGCACTCCCTGCTGAAGCGCCTGCGCAAGGCCAAGAAGGAGGCGCCGCCCATGGAGAAGCAGGAAGTGGTGAAGACGCACCTGCGGGACATGATCATCCTACCCGAGATGGTGGGCAGCATGGTGGGCGTCTACAACGGCAAGACCTTCAACCAGGTGGAGATCAAGCCCGAGATGATCGGCCACTACCTGGGCGAGTTCTCCATCACCT…	.	Long RNA	AC007969.5	.	.	.	.	-185.6	0.0734426	0.405557	0.922234	No	0.165
574	chr2	175492129	175492270	Y	-	15	326	15.5319	37.6673	32.633	.	.	.	.	sense	141	gaaagaaaGAGAgaaggagggagggaaggaaggaaggaagggaggaaggaagggagggaaaaagagagaaagaaagagaaaggaagaaagaaaggaaagaaagagaaaggaaagaaagaaggaaagaagaaaagaaaaaga	.	Repeats	CT-rich	.	.	.	.	0	0.00837589	0.00575177	0.00678723	No	1
575	chr2	175584527	175584719	Y	+	10	210	10.7687	25.9575	21.0838	.	.	.	pseudogene	sense	192	GTTCGCAGCCGCCGCCGCGCCGCCGTCGCTCTCCAACGCCAGCGCCGCCTCTCGCTCGCCGAGCTCCAGCCGAAGGAGAAGGGGGGTAAGTAAGGAGGTCTCTGTACCATGGCTCGTACAAAGCAGACTGCCCGCAAATCGACCGGTGGTAAAGCACCCAGGAAGCAACTGGCTACAAAAGCCGCTCGCAAG	.	Long RNA	H3F3AP4	.	.	.	.	-54.4	0.917469	0.66376	0.733734	No	0.993
576	chr2	175584908	175585265	Y	+	10	189	10.6397	23.7873	18.9679	.	.	.	pseudogene	sense	357	GCTTTGCAGGAGGCAAGTGAGGCCTATCTGGTTGGCCTTTTTGAAGACACCAACCTGTGTGCTATCCATGCCAAACGTGTAACAATTATGCCAAAAGACATCCAGCTAGCACGCCGCATACGTGGAGAACGTGCTTAAGAATCCACTATGATGGGAAACATTTCATTCTCAAAAAAAAAAAAAAAATTTCTCTTCTTCCTGTTATTGGTAGTTCTGAACGTTAGATATTTTTTTTCCATGGGGTCAAAAGGTACCTAAGTATATGATTGCGAGTGGAAAAATAGGGGACAGAAATCAGGTATTGGCAGTTTTTCCATTTTCATTTGTGTGTGAATTTTTAATATAAATGCGGAGACG	.	Long RNA	H3F3AP4	.	.	.	.	-80.8	0.93235	0.934899	0.92407	No	0.49
577	chr2	175585350	175585573	Y	+	13	310	13.7784	36.0573	31.0036	.	.	.	pseudogene	sense	223	TTTTCTGGACAATGCCAGCATTTGGATTTTTTTAAAACAAGTAAATTTCTTATTGATGGCAACTAAATGGTGTTTGTAGCATTTTTATCATACAGTAGATTCCATCCATTCACTATACTTTTCTAACTGAGTTGTCCTACATGCAAGTACATGTTTTTAATGTTGTCTGTCTTCTGTGCTGTTCCTGTAAGTTTGCtattaaaatacattaaactataaaaaa	.	RBP	H3F3AP4	SUB1	.	.	.	-32.6	0.960942	0.986605	0.950475	No	0.717
578	chr2	177065637	177065972	Y	-	52	1445	51.4495	150.251	144.554	.	.	ALL_AGO|slc2290_chr15|48|7|31|0.23|COORDS=chr15+:67534898	pseudogene	sense	335	CGTCTCCAAGCTCGCCTGCATCTACTCGGCCCTCATTCTGCACGACGATGAGGTGACAGTCACGGAGGATAAGATCAATGCCCTCATTAAAGCAGCCGGTGTAAATGTTGAACCTTTTTGGCCTGGCTTGTTTGCAAAGGCCCTGGCCAACGTCAACATTGGGAGCCTCATCTGCAATGTAGGGGCTGGTGGACCTGCTCCAGCAGCTGGTGCTGCACCAGCAGGACGTCCTGCCCCCTCCACTGCTGCTGCTCCAGCTGAGGAGAAGAAAGTGGAAGCAAAGAAAGAAGAATCCAAGGAGTCTGATGATGACATGGGCCTTGGTCTTTTTGACT	.	Long RNA	AC016739.2	.	.	.	.	-124.8	0.917818	0.53677	0.903385	T16017	0.006
579	chr2	181737428	181737561	Y	-	17	434	17.7328	48.6073	43.4567	.	.	.	intron	antisense	133	GACTTCCCTGGTCACCAAGGCAGTGCATGCATGTTGGGGTTTCCTTTACCTTTTCTATAAGTTGTACCAAAACATCCACTTAAGTTCTTTGATTTGTACCATTCCTTCAAATAAAGAAATTTGGTACCCAAAA	.	Antisense	.	.	Long RNA	SCHLAP1	.	-22	0.254579	0.251301	0.755391	No	0.322
580	chr2	181737791	181738010	Y	-	6	118	6.89609	16.4617	11.8784	.	.	.	pseudogene	sense	219	CGATGATGTGGCTTTGAAGAACTTTGCCAAATACTTTCTTCACCAATCTCATGAGGAGAGGGGACATGCTGAGAAACTGATGAAGCTGCAGAACCAATGAGGTGGCCGAATCTTCCTTCAGGATATCAAGAAACCAGACTGTGATGACTGGGAGAGCGGGCTGAATGCGATGGAGTGTGCATTACATTTGGAAAAAAATGTGAATCAGTCACTACTGGA	.	Long RNA	FTHL20	.	Long RNA	SCHLAP1	.	-51.9	0.0923607	0.00713699	0.996553	No	0.554
581	chr2	182140515	182140586	Y	+	9	95	8.49045	14.1308	9.59934	.	.	.	.	sense	71	GCActaaccctaaccctaaccctaaccctaaccctaaccctaaccctaaccctaaccctaaccctaacccG	.	Repeats	(CCCTAA)n	.	.	.	.	0	0.249718	0.0648169	0.0731268	No	1
582	chr2	188390138	188390205	Y	-	5	75	5.82447	11.9939	7.59992	.	.	.	.	sense	67	TGAgaaagagagagggaaagagggaggaaggagaaaaaaaggaagggaggaagggagaaagaaagga	.	Repeats	CT-rich	.	.	.	.	0	0.00474627	0.000373134	0.000432836	No	1
583	chr2	192701158	192701315	Y	-	7	126	7.79646	17.2816	12.662	.	.	.	exon	sense	157	AGATGATGATTTGCCCCACGATGAGGAGGCCCTGGAAGACAGTGCCGAGGAAAAGGTGGAAGAAAGTAGGGCAGAGAAAATAAAAAGATCCAGCCTGAAGAAAGTGGATAGCCTCAAGAAAGCATTTTCTCGCCAGAACATCGAGAAAAAGATGAAC	.	RBP	SDPR	ZNF622	.	.	.	-33	0.460089	0.718809	0.806255	T4784	0.049
584	chr2	192711351	192711823	Y	-	8	145	8.7367	19.2596	14.5847	.	.	.	exon	sense	472	AGTTCCCCTGATCAGCGTAGCCAGTTGTTGCCTGTCTGAACCTCTGCCAGTCCTGGAGACTGGTGCCCTGAGCTCCAACCAGCGGGCCTCATCCTACACCCTCACCACCGCAACTTCTCACCCGAGCAAGAAGCAGCTCCCAGAGAGAAAGAACGTTCCCACCTGCCTAGCCATGGGAGAGGACGCTGCACAGGCCGAAAAGTTCCAGCACCCTGGGTCTGACATGCGGCAGGAAAAGCCCTCGAGCCCCAGCCCGATGCCTTCCTCCACACCAAGCCCCAGCCTGAACCTAGGGAACACAGAGGAGGCCATCCGGGACAACTCACAGGTGAACGCAGTCACGGTGCTCACGCTCCTGGACAAGCTGGTGAACATGCTAGACGCTGTGCAGGAGAACCA…	.	RBP	SDPR	EIF3D	RBP	AC098617.1	NONO	-152.9	0.696333	0.61886	0.630564	T4783	0.366
585	chr2	202008111	202008201	Y	+	11	259	11.8333	30.8987	25.9257	.	.	.	.	sense	90	ttgaacctgagaggcggaggttgtcgtgagccgagattgtgccattgcactccagtttgggcaacaagagtggaactccgtctcaaaaaa	.	Repeats	AluSp	.	.	.	.	-29.8	0.0346889	0.0360333	0.0416667	No	0.022
586	chr2	202077810	202077940	N	-	6	121	6.90739	16.8161	12.1984	.	.	.	intron	antisense	130	GATAAAGTTTGCAAGAACTGCTAACTCATGCCTCCATGCCTAACAACATAGTTTTCTCAACTTTTAGAGGATGAGAGTTATCCATTGGTCTTAGGAACCAAAAATATTGGTGCAACTCCAAATAAAAGTA	.	Antisense	.	.	Long RNA	CASP10	.	-19.7	0	0	0	No	0.512
587	chr2	202241937	202242123	Y	-	7	131	7.82317	17.781	13.1451	.	.	.	exon	sense	186	TGCAGTGTGATAACTGAGCGGTCGCATGGCAGAGGACATCCCCCTCAGAGTGGGCACAAGTGCCCTCTAGGGCAGCCAGGGGAATACTATTGTTCGATACCTGGGATTTGACTTTGTCAAACAGCTCTTTGTGCCCCTATCTTTGTTTTGTCAAATGTAGATCAGTTAATAAACATGAGTAGCTTG	.	Long RNA	TRAK2	.	.	.	.	-54.6	0.330124	0.300952	0.301237	T6993	0.126
588	chr2	202244189	202244362	Y	-	6	121	6.90739	16.8161	12.1984	.	.	.	exon	sense	173	GTGCAATCAATAGGAATTAGGGAATGTTGTATATTTATATATGTAAACTTTTTTTGTAAGAAAAGTTGGTGACAACTAAACCAACTTTTTCCAAAGTGCGCTATGCATATTTTTAATGAAAGATGACATGTATTTGCACAAAAATTCTCAGGCACATTAAATTATTGTAAACT	.	RBP	TRAK2	FUBP3	.	.	.	-33.6	0.905994	0.744133	0.698491	T6990	0.04
589	chr2	202316070	202316273	Y	-	7	145	7.88124	19.1868	14.5188	.	.	.	exon	sense	203	GCCATTGACCCGGTGTCGCCGCAGAACCGAGGTCGCCGAGTGATGATGTTGTGAAGTCGCCCGCCTGTCCCTGCCACGCCCGGGCGGTTGCTGGCAGTGGGAGCAGCGGCAGCAGCTTCGGCTGCTGCTTTCAGGCTGCCGCTGCATTAGGGGCTTCCTGAGGAAGCGCGGGCGGACGACAGAGGATGCCGAACCACTCCAGT	.	RBP	TRAK2	NCBP2	Long RNA	STRADB	.	-92.1	0.254399	0.287044	0.289877	T6984	0.163
590	chr2	204055556	204056013	Y	+	16	384	16.6751	43.6356	38.4734	.	.	.	pseudogene	sense	457	GGAGGTGAAGTCGGTGCCACTTCTGCCCTGGCCCCCAAGATCGGCCCCCTGGGTCTGTCTCCAAAAAAGGTTGGTGATGACATTGCCAAGGCAACGGGTGACTGGAAGGGCCTGAGGATTACAGTGAAACTGACCATTCAGAACAGACAGGCCCAGATTGAGGTGGTGCCTTCTGCCTCTGCCCTGATCATCAAAGCCCTCAAGGAACCACCAAGAGACAGAAAGAAACAGAAAAACATTAAACACAGTGGGAATATCACTTTTGATGAGATCGTCAACATTGTTCGACAGATGCGGCACCGATCCTTAGCCAGAGAACTCTCTGGAACCATTAAAGAGATCCTGGGGACTGCCCAGTCTGTGGGCTGTAATGTTGATGGCCGCCATCCTCATGACATC…	.	Long RNA	AC011737.2	.	.	.	.	-145.3	0.8924	0.836249	0.947239	No	0.019
591	chr2	217364010	217364119	Y	+	12	278	12.7835	32.8277	27.8333	.	.	ALL_AGO|slc8685_chr2|47|3|9|0.33|COORDS=chr2+:217072329	exon	sense	109	GTCGGGATCGTCGGTAAATACGGGACCCGCTATGGGGCCTCCCTCCGGAAAATGGTGAAGAAAATTGAAATCAGCCAGCACGCCAAGTACACTTGCTCTTTCTGTGGCA	.	RBP	RPL37A	IGF2BP1	.	.	.	-21.5	0.982055	0.974037	0.979963	T24752,T24671,T21040	0.987
592	chr2	217364679	217364751	Y	+	6	103	6.82661	14.8784	10.3278	.	.	.	exon	sense	72	GAAGAGACGAGCTGTGGGGATCTGGCACTGTGGTTCCTGCATGAAGACAGTGGCTGGCGGTGCCTGGACGTA	.	RBP	RPL37A	SERBP1	.	.	.	-18.9	0.949833	0.839639	0.930583	T24752,T24671,T21040	0.637
593	chr2	217366070	217366184	Y	+	9	182	9.78016	23.051	18.245	.	.	ALL_AGO|slc8687_chr2|51|3|10|0.30|COORDS=chr2+:217074387	exon	sense	114	TCCGCTGTCACGGTAAAGTCCGCCATCAGAAGACTGAAGGAGTTGAAAGACCAGTAGACGCTCCTCTACTCTTTGAGACATCACTGGCCTATAATAAATGGGTTAATTTATGTA	.	RBP	RPL37A	LARP4	.	.	.	-25.1	0.655868	0.686447	0.73014	T24752,T21040	0.247
594	chr2	220115053	220115463	N	-	5	91	5.90471	13.6162	9.16355	.	.	.	exon	sense	410	CGTGGAGATGTGGTGCCCAAGGATGTCAACGCTGCCATTGCCGCCATCAAGACCAAGCGCAGCATTCAGTTTGTGGACTGGTGCCCCACAGGCTTCAAGGTTGGTATCAACTACCAGCCTCCCACTGTGGTGCCTGGGGGTGACCTGGCCAAGGTGCAGCGTGCCGTGTGCATGCTGAGCAACACGACCGCCATCGCCGAGGCCTGGGCCCGCCTGGACCACAAGTTCGACCTGATGTATGCCAAGAGGGCGTTTGTGCACTGGTATGTGGGTGAGGGCATGGAGGAGGGTGAGTTCTCCGAGGCCCGTGAGGATATGGCTGCCCTGGAGAAGGATTATGAGGAGGTGGGCATCGACTCCTATGAGGACGAGGATGAGGGAGAAGAATAAAGCAGCTGC…	.	RBP	TUBA4A	LIN28B	Long RNA	STK16	.	-155.3	0	0	0	No	0.521
595	chr2	225449657	225449917	Y	-	5	83	5.86738	12.7408	8.31952	.	.	.	exon	sense	260	gccgccgccgccgccgccgccgcccccgccgccgccgcggctgccCAGGGGCCGGCCAGCTCCCCAGCCCTgcccgggggtcgcgccgccgccgcccccAGCGTCGCCCCTAGCCTGCCTGCCCGCCTTAAATGTGACACCGGCGTCGCGGAGCGCGACCTGAAGCCGCCGCCGGGGAGGGGACGAGCACCATGTCGAATCTGAGCAAAGGCACGGGCAGCCGGAAGGACACCAAGATGCGGATCCGGGCCTTTCCGGTG	.	RBP	CUL3	PPIG	.	.	.	-113.1	0.7563	0.776381	0.791454	No	1
596	chr2	230537176	230537290	Y	-	5	33	4.92411	6.90188	3.30784	.	.	.	.	sense	114	tctcctcttcctcctcctcctagtcctcctcctgcttcttcctctctttctGTCTTtccctctctcccctttcctgcctccatccctcctttcccctctccatccctccctttc	.	Repeats	GA-rich	.	.	.	.	0	0.0297719	0.00246491	0.00320175	No	1
597	chr2	232329101	232329191	Y	-	11	251	11.805	30.0714	25.1618	.	.	.	exon	sense	90	TCGAGCTCTCGCTGGCCTTCGGGTGTACGTGCTCCGGGATCTTCAGCACCCGCGGCCGCCATCGCCGTCGCTTGGCTTCTTCTGGACTCA	.	RBP	NCL	FXR2	.	.	.	-27.5	0.111111	0.204356	0.125144	T6224	0.658
598	chr2	232573234	232573456	Y	+	25	693	25.6387	74.7391	69.3164	.	.	ALL_AGO|slc9296_chr2|63|4|16|0.25|COORDS=chr2+:232281513	exon	sense	222	CCCCCACTGGCTGCTCTGAAAAGCCATCTTTGCATTGTTCCTCATCCGCCTCCTTGCTcgccgcagccgcctccgccgcgcgcctcctccgccgccgcGGACTCCGGCAGCTTTATCGCCAGAGTCCCTGAACTCTCGCTTTCTTTTTAATCCCCTGCATCGGATCACCGGCGTGCCCCACCATGTCAGACGCAGCCGTAGACACCAGCTCCGAAATCACCA	.	RBP	PTMA	GRWD1	.	.	.	-60.2	0.810968	0.755306	0.727586	No	0.067
599	chr2	232576602	232576690	Y	+	30	854	30.5573	90.9318	85.4288	.	.	.	exon	sense	88	GAGGAAAATGGGGAGCAGGAGGCTGACAATGAGGTagacgaagaagaggaagaaggtggggaggaagaggaggaggaagaagaagGTG	.	RBP	PTMA	NPM1	.	.	.	-2.2	0.988398	0.973761	0.985943	No	0.182
600	chr2	232577564	232577991	Y	+	7	127	7.80184	17.3768	12.7279	.	.	.	exon	sense	427	GCAAAAAAGGAAAAGTTAAACTAAAAAAAAAAAGGCCGCCGTGACCTATTCACCCTCCACTTCCCGTCTCAGAATCTAAACGTGGTCACCTTCGAGTAGAGAGGCCCGCCCGCCCACCGTGGGCAGTGCCACCCGCAGATGACACGCGCTCTCCACCACCCAACCCAAACCATGAGAATTTGCAACAGGGGAGGAAAAAAGAACCAAAACTTCCAAGGCCCTGCTTTTTTTCTTAAAAGTACTTTAAAAAGGAAATTTGTTTGTATTTTTTATTTACATTTTATATTTTTGTACATATTGTTAGGGTCAGCCATTTTTAATGATCTCGGATGACCAAACCAGCCTTCGGAGCGTTCTCTGTCCTACTTCTGACTTTACTTGTGGTGTGACCATGTTCAT…	.	RBP	PTMA	IGF2BP2	.	.	.	-96.2	0.917422	0.895436	0.886876	T16290,T7823,T16291	0.077
601	chr2	233055273	233055369	Y	+	20	391	19.6679	44.2899	39.1255	.	.	.	.	sense	96	TGagagagagagaaagaagagagagagaggaagagaggaaggaaggaaggaagaaaggaagaaagaaagagaaagaaagagagaaagaaagaaGGc	.	Repeats	A-rich	.	.	.	.	0	0.0118958	0.00773958	0.00805208	No	1
602	chr2	235405212	235405453	Y	-	7	128	7.8073	17.476	12.8552	.	.	.	.	sense	241	AGAGACGCGATGCCCGCCGATCGCGAGCCCGGCCGGCGAGGGCGCGGGGACTGCGGCGTCTGAGCGCGCCAAGCCGTgcgcccgcggggacgccgagccccggggccggtgcgggcggcggcgggcggggcccaggtgcgcccggccgcgtcgggcccgTGACTGCTCGGGGGGCGGCGCCCTCCCGCCGCAGCCGCAGTGGCTGGCGCCGCAGCCAGGAGCCATGGGCAACATCTCCTCT	.	Repeats	GC_rich	.	.	.	.	-146	0.553983	0.353556	0.264585	No	0.685
603	chr20	1857699	1857857	Y	+	7	74	7.09852	11.8242	7.42908	.	.	.	Intergenic	unannotated	158	TCCATCCCCGTGTCCATCCCCCCGTGTCCATCCCCCTGTGTCCATCCCCTGTATCCATCCCCTGTGTCCATCCCCTGTATCCACCCCCCTGTATCCACCCCCCTGTATCCATCCCCCCTGTGTCCATCCCCCTGTGTCCATCCCCGTGTCCATCCCCC	.	Unannotated	.	.	Unannotated	.	.	-1.4	0.0121456	0.00583544	0.136234	No	1
604	chr20	3765806	3765922	Y	-	27	569	26.2219	62.2367	56.952	.	.	.	.	sense	116	Tgagggagaggaagaggaggaggaggaggaagaagaggaggaggaagagggtgaaggagaggaagaggaggaggaaggggaggaggaggaggaggaagggggggaaggagaggaat	.	Repeats	CT-rich	.	.	.	.	0	0.70806	0.780948	0.776052	No	1
605	chr20	4004565	4005086	Y	+	25	532	24.5453	58.5378	53.2351	.	.	.	pseudogene	sense	521	GAGCTCCCAGATTCGTCAAAATTATTCCACCGACGTGGAGGCAGCCGTCAACAGCCTGGTCAATTTGTACCTGCAGGCCTCCTACACCTACCTCTCTCTGGGCTTCTATTTCGACCGCGATGATGCGGCTCTGGAAGGCGTGAGCCACTTCTTCCGCGAATTGACCGAGGAGAAGCGCGAGGGCTACGAGCGTCTCCTGAAGATGCAAAACCAGCGTGGCGGCCGCGCTCTCTTCCAGGACATCAAGAAGCCAGCTGAAGATGAGTGGGGTAAAACCCCAGATGCCATGAAAGCTGCCATGGCCCTGGAGAAAAAGCTGAACCAGGCCCTTTTGGATCTTCATGCCCTGGATTCTGCCCACATGGACCCCCATCTCTGTGACTTCCTGGAGACTCACTT…	.	Long RNA	RP4-681N20.1	.	.	.	.	-191.1	0.484672	0.734704	0.913027	T18165	0.012
606	chr20	4004621	4005086	Y	-	5	67	5.7405	10.943	6.7019	.	.	.	pseudogene	antisense	465	CGTGCTTGAGAGTGAGCCTTTCGAAGAGATACTCGCCCAGCCCAGCCTCTGGGCCTCCCAGCCTGTGGAGGTTCGTCAGGTGGTCACCCATCTTCTTGATGAGCTTCACTTCCTCATCTAGGAAGTGAGTCTCCAGGAAGTCACAGAGATGGGGGTCCATGTGGGCAGAATCCAGGGCATGAAGATCCAAAAGGGCCTGGTTCAGCTTTTTCTCCAGGGCCATGGCAGCTTTCATGGCATCTGGGGTTTTACCCCACTCATCTTCAGCTGGCTTCTTGATGTCCTGGAAGAGAGCGCGGCCGCCACGCTGGTTTTGCATCTTCAGGAGACGCTCGTAGCCCTCGCGCTTCTCCTCGGTCAATTCGCGGAAGAAGTGGCTCACGCCTTCCAGAGCCGCAT…	.	Antisense	.	.	Long RNA	RP4-681N20.1	.	-180.9	0.501628	0.747794	0.910514	No	0.012
607	chr20	18485241	18485711	N	+	27	713	27.4381	76.7754	71.344	.	.	ALL_AGO|slc4636_chr19|50|1|10|0.10|COORDS=chr19+:47065607	pseudogene	sense	470	CCCTTTCCCCTGGCTGGCAGCGCGGAAGCCGCACGATGCCTGGAGTTCCTGTAAACCACGTGAACCAGCGGGACTTCGTCAGAGCTCTGGCAGCCTTTCTCAAAAAGTCCGGGAAGCTGAAAGTCCCCGAATGGGTGGACACCGTCAAGCTGGCCAAGCACAAAGAGCTTCCTCCCTACGTTGAGAACTGGTTCTACACACGAGCCGGTTCCACAGCGCGGCACCTGTACCTCCAGGGTGGCGCTGGGGTTGGCTCCATGACCAAGATCTATGGGGACGTCAGAGAAACGGCGTCATGCCCAGCCACTTCGGCCGAGGCTTCAAGAGTGTCCTCCGCCGGGTCCTCCAAGCCCTGGAGGGGCTGAAAATGGTGGAAAAGGACCAAGATGGGGGCCGCAA…	.	Long RNA	RPS19P1	.	.	.	.	-182.6	0	0	0	No	0.047
608	chr20	19804458	19804543	Y	-	6	106	6.84528	15.2319	10.6874	.	.	.	pseudogene	sense	85	GAGGTGCACCGGAGGTGAAGTCGGTGCCACTTCTGCCCTGGCCCCCAAGATCGGCCCCCTGGGTCTGTCTCCAAAAAAGGTTGGT	.	Long RNA	RPL12L3	.	.	.	.	-29.7	0.132635	0.730988	0.999424	No	0.343
609	chr20	21146922	21147225	N	-	19	417	19.2739	46.8815	41.7426	.	.	.	pseudogene	sense	303	GAATGTCCTGGCAGATGCTCTCAAGACCATCAACAATGCCGAAAAGAGAGGCAAACGCCAGGTGCTTATTAGGCCGTGCTCCAAAGTCATCGTCCGGTTTCTCATTGTGATGATGAAGCATGGTTACACTGGCGAATTTGAAATCATTGATGACCACAGAGCTGGGAAATTGTTGTGAACCTCACAGGCAGGCTAAACAAGTGTGGAGTGATCAGCTCCAGATTTGACGTGCAACTCAAAGACCTGGAAAAATGGCAGAATAATCTGCTTCCATCCTGCCAGTTGGTTTCATTGTACTGACAA	.	Long RNA	RPS15AP1	.	Long RNA	KIZ	.	-94.1	0	0	0	No	0.003
610	chr20	23614352	23614588	N	-	7	134	7.83634	18.0549	13.4164	.	.	.	exon	sense	236	ATGACCTTGTCGAAATCCACCTGTCAGGACGCCTAGGGGTCTGTACCGGGCTGGCCTGTGCCTATCACCTCTTATGCACACCTCCCACCCCCTGTATTCCCACCCCTGGACTGGTGGCCCCTGCCTTGGGGAAGGTCTCCCCATGTGCCTGCACCAGGAGACAGACAGAGAAGGCAGCAGGCGGCCTTTGTTGCTCAGCAAGGGGCTCTGCCCTCCCTCCTTCCTTCTTGCTTCTC	.	RBP	CST3	DHX30	.	.	.	-81.4	0	0	0	T12531	0.055
611	chr20	35177959	35178134	Y	+	6	94	6.77071	14.007	9.47571	.	.	.	exon	sense	175	CCGAGGAGGAAGGGAAGGGGCTCTGTGTGCCCCCCAGGAGGAAGAGGCCCTGAGTCCTGGGATCAGACACCCCTTCACGTGTATCCCCACACAAATGCAAGCTCACCAAGGTCCCCTCTCAGTCCCCTTCCCTACACCCTGACCGGCCACTGCCGCACACCCACCCAGAGCACGC	.	RBP	MYL9	DDX55	RBP	RP5-977B1.7	CSTF2T	-52.7	0.0704857	0.00446857	0.00507429	T8273	0.264
612	chr20	35518804	35518878	Y	-	11	249	11.7962	29.8375	24.9301	.	.	.	.	sense	74	aaagaaagaaaggaaggaaggaaggagggaaggaaggaaggaaagagagaaagaaaagaaagaaagaaagaaag	.	Repeats	T-rich	.	.	.	.	0	0.0588378	0.0293378	0.047973	No	1
613	chr20	39732664	39732763	Y	+	9	202	9.86105	25.0759	20.2203	.	.	.	intron	sense	99	GTTCAAGACAACTCCACTGTTCAAAGTCCTTTAAGGGCTCAGTCTCTTTAACATGGCATTTAAAGCTGGCCACATTTAGCAGTGGATGTCACAGGAGAG	.	RBP	TOP1	SLTM	Long RNA	RP1-1J6.2	.	-25.2	0.0471717	0.0184747	0.0213939	No	0.07
614	chr20	40813175	40813240	Y	+	6	110	6.86288	15.6058	11.0424	.	.	.	.	sense	65	tcttcctcttcttcttcttcttcttattcttcttcttcttcttcttcttcttcttcttcctcttc	.	Repeats	(TTC)n	.	.	.	.	0	0.0261231	0.0261231	0.0261692	No	1
615	chr20	43095170	43095501	N	-	14	335	14.748	38.6332	33.5923	.	.	ALL_AGO|slc8687_chr2|51|3|10|0.30|COORDS=chr2+:217074387	pseudogene	sense	331	GGACCTAGTTCGCGGTGACATGGCCAAACCTACCAAGAAAGTCGGGATCGTCGGTAAATACGGGACCCGCTATGGGGCCTCCCTCTGGAAAATGGTGAAGAAAGTTGAAATCAGCCAGCAGGCCAAGTACACTTGCTCTTTCTGTGGCAAAACCAAGATGAAGAGATGAGCTGCGGGGATCTGGCACTGTGGTTCCCGCGTGAAGACAGTGGCTGGCGGTGCCTGGACATACAATACCACCTCCGCTATCACGGTAAAGTCCGCCATCAGAAGCCTGAAGGAGTTGAAAGACCAGTAGACGCTCCTCTACTCTTTGAGACATCACTGGCCT	.	Long RNA	RPL37AP1	.	.	.	.	-97.9	0	0	0	No	0.713
616	chr20	43536741	43536884	Y	+	7	145	7.88421	19.276	14.5794	.	.	.	exon	sense	143	TTGTCCATCTGCTGAAATGAGAAAAGAAAAATTTATGCACTGATTTAAAACAAACCaaaaaaaaagaaaaaaacaaaaaaaaaaaTCCCTCCTTTCTAGCTGAACAAAAATGTGCAGTTAATACTTGGCGCTTGAAAATGCAG	.	RBP	YWHAB	KHDRBS1	.	.	.	-12.34	0.823909	0.784629	0.827427	No	0.559
617	chr20	44269274	44269374	Y	-	6	114	6.87919	15.997	11.4384	.	.	.	pseudogene	sense	100	GCTGCTCATGATGGCTGGTATCGATGACTGCTACACCTCAGCCCGGGGCTGCACTGCCACCCTGGGCAACTTCGCCAAGGCCACCTTTGATGCCATTTCT	.	Long RNA	RPS2L1	.	.	.	.	-30.8	0.25031	0.93989	0.9999	No	0.145
618	chr20	44576077	44576162	Y	+	15	349	15.6636	40.0171	34.9046	.	.	.	intron	sense	85	GTGGGTGCCAGGGAGGGCAGGGGAAGGAGGCTGGGCTGGCCAGGCCAGGCCCAGCCCCACCCTGAGCCATTGCCTTTGCCCGCAG	Y	RBP	PCIF1	EFTUD2	.	.	.	-52.8	0.510988	0.236106	0.164047	T23389	0.001
619	chr20	49456749	49457280	Y	-	77	2278	75.7181	233.697	227.807	.	.	.	pseudogene	sense	531	GACAAATCCGATATGGCTGAGATCGAGAAATTCGATAAGTCGAAACTGAAGAAGACAGAGACGCAAGAGAAAAATCCACTGCCTTCCAAAGAAACGATTGAACAGGAGAAGCAAGCAGGCGAATCGTAATGAGGCGTGTGCCGTCAATATGCACTGTACATTCCACAAGCATTGCCTTCTTATTTTACTTCTTTTAGCTGTTTAACTCTGTAAGATGCAAAGAGGTTGGATCAAGTTTAAATGACTGTGCTGCCCCTTTCACATCAAAGAACTACTGACAACGAAGGCCGCGACTGCCTCTCCCATCTGTCTATCTGGCTGGCAGGGAAGGAAAGAACTTGCATGTTGGTGAAGGAAGAAGTGGGGTGGGACAACAGTGAAATCTAAAGTAAAACCAAG…	.	Long RNA	TMSL6	.	Long RNA	BCAS4	.	-118.6	0.458015	0.828977	0.940443	T16884	0.736
620	chr20	51589248	51589343	Y	+	28	555	26.5293	60.882	55.5616	.	.	.	.	sense	95	ggaggaggaagaaaagaaggaggaggtggaggaggaggtggaggaggaggaggaggagggaaagaggagaaggaagaagaagaAAAAGAAGAAAC	.	Repeats	(GGA)n	.	.	.	.	0	0.549189	0.630421	0.817884	No	1
621	chr20	51846395	51846518	Y	+	8	141	8.70519	18.8052	14.1168	.	.	.	.	sense	123	tggaaagaaaagagggaggaagaaaggaaggaaaAGAGAGAGGGAGGGGAAAAAAAGAgaaagaagaaggaagagaaagaaaagagaggaaggaagaaagagaaagaagaaggaagagaaaga	.	Repeats	GA-rich	.	.	.	.	0	0.0349593	0.0241382	0.0266748	No	1
622	chr20	53691142	53691568	Y	+	9	183	9.78494	23.1484	18.3412	.	.	.	pseudogene	sense	426	GTCCCGAATCCGGGTTCATCCGACACCAGCCGCCTCCACCATGCCGCCGAAGTTCGACCCCAACGAGATCAAAGTCGTATACCTGAGGTGCACCGGAGGTGAAGTCGGTGCCACTTCTGCCCTGGCCCCCAAGATCGGCCCCCTGTGTCTGTCTCCAAAAAAGGTTGGTGATGACATTGCCAAGGCAACGGTGACTGGAAGGGCCTGAGGATTACAGTGAAACTGACCATTCAGAACAGACAGGCCCAGATTGAGGTGGTGCCTTCTGCCTCTGCCCTGATCATCAAAGCCCTCAAGGAACCACCAAGAGACAGAAAGAAACAGAAAAACATTAAACACAGTGGGAATATCACTTTTGATGAGATCGTCAACATTGCTCGACAGATGCGGCACCGATCC…	.	Long RNA	RPL12P4	.	.	.	.	-128.6	0.666371	0.716188	0.998535	No	0.049
623	chr20	55966456	55966791	Y	+	6	112	6.8723	15.8259	11.2537	.	.	.	exon	sense	335	GTCCCCGCAGCGCCGGTCGGGAGCGCAGCGCGGCGCACGTCGGCGCGCACGGCGGGACGGGCGCCGGAGTGGTCGGGCCTGGCGGCTGGAcgggcgcccctcgctgccccgcgcgctccccgccgccccccatgagcgcagccccgcgcggcccgggtccgtaggcggcggggcgccccccATGCTGCTGCAgcccgcgccgtgcgccccgagcgcgggcttcccgcggcccctggccgcccccggcgccATGCACGGCTCGCAGAAGGACACCACGTTCACCAAGATCTTCGTGGGCGGCCTGCCGTACCACACTACCGACGCCTCGCTCAGGA	.	RBP	RBM38	GEMIN5	Long RNA	RP4-800J21.3	.	-175.5	0.32554	0.515221	0.465525	No	0.982
624	chr20	55984079	55984383	Y	+	10	214	10.784	26.2905	21.4145	.	.	.	exon	sense	304	GTTCCTGCCTGTCTTGGGGGTTGGTGGAGGGTGGAGGCAGTTCTGCCAGCCGTGGCAGGGCTGCTATGGGGCATCCAGGGCTGTGGGGGTCTGGAGGAGGGGACATGAGGTGAGAGGTATCCTGGCCGAGGGCGGGGGGCAGCGGGGGGTCTCCCTCCGGACCTACCTCAGGGAGCTGAGCGTGCAGGCGCTCCAGGGCAGGCCTGGGACAGAGTCAAGGCTCAGAGAATAAAGGTAGCTAATCTCATCATAATATTTTTATTAGAATGTTCTGATGATAAAAATAAAACTTGTTTTCTTTAAA	.	RBP	RBM38	UPF1	.	.	.	-125.6	0.384349	0.319484	0.337398	T8171	0
625	chr20	57465043	57465239	Y	+	9	155	9.59387	20.3098	15.5751	.	.	.	intron	sense	196	ttggcCGAGCCGAGAGAGCCGCTCGCGCCGCGGAAGAGCGGGGACCCCGAGAAGCTCGCGAAGAACCCCAAGAACCCGGCGCGGGAGGCGCTCCCCGAAAAGTTCCTAACAGACAAGGAGCGCAAGAAGCTCGAGAAGAAGCTGCTGGAGCAGAGGCGAaaggaggagaagaagaaggagaaggagaggaagaaga	.	RBP	GNAS	TRA2A	.	.	.	-63.6	0.0829235	0.207245	0.231138	No	0.003
626	chr20	57466410	57466854	Y	+	9	194	9.83349	24.2792	19.4448	.	.	.	exon	sense	444	TTGGCTcggggcggcggcgggggcccggccgAGGCAATAAGAgcggcggcggcggcagcggcggcagcagcTCCCGCAGCTCCTGCTCTGGTCCGCCTCGGCCCGGCGGCGGCCATCAGCCCCCTCGGCCTCGGCTCGAGGGGCGGGGAGCTGCGCGCGCCCCTCGGTCCGACCGACAccctccccttcccgcccgtccgcgcgccccgcggcccgcggcccgcagtccgccccgcgcgctccttgccgaggagccgagcccgcgcccggcccgcccgcccggcgctgccccggccctcccggcccGCGTGAGGCCGCCCGCGCccgccgccgccgcagcccggccgcgccccgccgccgccgccgccgccATGGGCTGCCTCGGGAACAGTAAGACCG…	.	RBP	GNAS	NCBP2	.	.	.	-258.2	0.481065	0.406306	0.467466	No	0.421
627	chr20	57478726	57478813	Y	+	6	94	6.77071	14.007	9.47571	.	.	.	exon	sense	87	ACCATTGTGGCCGCCATGAGCAACCTGGTGCCCCCCGTGGAGCTGGCCAACCCCGAGAACCAGTTCAGAGTGGACTACATCCTGAGT	.	RBP	GNAS	FMR1,FXR2,DDX24	.	.	.	-22.9	0.990609	0.979828	0.97731	No	0.683
628	chr20	57485836	57486242	Y	+	9	195	9.83783	24.3956	19.56	.	.	ALL_AGO|slc3004_chr20|67|13|18|0.72|COORDS=chr20+:56919231;ALL_AGO|slc3005_chr20|41|1|5|0.20|COORDS=chr20+:56919485	exon	sense	406	CGTGACATCATTCAGCGCATGCACCTTCGTCAGTACGAGCTGCTCTAAGAAGGGAACCCCCAAATTTAATTAAAGCCTTAAGCACAATTAATTAAAAGTGAAACGTAATTGTACAAGCAGTTAATCACCCACCATAGGGCATGATTAACAAAGCAACCTTTCCCTTCCCCCGAGTGATTTTGCGAAACCCCCTTTTCCCTTCAGCTTGCTTAGATGTTCCAAATTTAGAAAGCTTAAGGCGGCCTACAGAAAAAGGAAAAAAGGCCACAAAAGTTCCCTCTCACTTTCAGTAAAAATAAATAAAACAGCAGCAGCAAACAAATAAAATGAAATAAAAGAAACAAATGAAATAAATATTGTGTTGTGCAGCattaaaaaaaatcaaaataaaaattaaat…	.	RBP	GNAS	RBM15	.	.	.	-73.4	0.764653	0.876473	0.799603	No	0.013
629	chr20	57598806	57599321	Y	+	6	106	6.84277	15.182	10.627	.	.	.	exon	sense	515	GGAGCCGAGCTGATCGAGAATGTCCTAGAGGTGGTGAGGCACGAGAGTGAGAGCTGTGACTGCCTGCAGGGCTTCCAGATCGTCCACTCCCTGGGCGGGGGCACAGGCTCCGGGATGGGCACTCTGCTCATGAACAAGATTAGAGAGGAGTACCCGGACCGGATCATGAATTCCTTCAGCGTCATGCCTTCTCCCAAGGTGTCGGACACTGTGGTGGAGCCCTACAACGCGGTTCTGTCTATCCACCAGCTGATTGAGAATGCAGATGCCTGTTTCTGCATTGACAATGAGGCCCTCTATGACATCTGCTTCCGTACCCTGAAGCTGACGACACCCACCTATGGGGATCTCAACCACCTAGTGTCCTTGACCATGAGCGGCATAACCACCTCCCTCCGG…	.	RBP	TUBB1	BUD13	.	.	.	-192	0.760206	0.77108	0.890214	T403	0.059
630	chr20	57599708	57599859	Y	+	5	76	5.83106	12.0963	7.69906	.	.	.	exon	sense	151	GGAAGCTGAAAATAACATCCATGATTTGGTATCCGAGTACCAACAATTTCAAGATGCCAAAGCAGTTCTAGAGGAAGATGAAGAGGTCACGGAGGAGGCAGAAATGGAGCCAGAAGATAAGGGACATTAACTGTGAGAGAAGCTGTGCCGC	.	RBP	TUBB1	ZNF622	.	.	.	-26.9	0.362192	0.178517	0.449272	No	0.615
631	chr20	60962158	60962426	Y	+	8	141	8.70519	18.8052	14.1168	.	.	ALL_AGO|slc3225_chr20|43|8|10|0.80|COORDS=chr20+:60395741	exon	sense	268	CCTTTCTCTCTCGCGCGCGGTGTGGTGGCAGCAGGTGTGGCGCGCGGCGCGGGCTTCgggctcagggctggggctggggcgggagtgggggcttggacgcgggggacggggtgcggggtgctgggtgcggctggggccgTGACCCTAGGGGCCGGTTTGCGCCGGGAGCCGGGGCACGGTTCCGGCCGTACTCACGGCGCCGCGCGGTGACTCCCCAGGCGCAGCCCAGCCTCGAAATGCAGAACGACGCCGGCGAGTTCGTGGACCT	.	RBP	RPS21	GTF2F1	.	.	.	-146.5	0.113836	0.157444	0.157493	T8091	0.302
632	chr20	60962665	60962933	Y	+	8	160	8.81938	20.7658	16.0266	.	.	.	exon	sense	268	GCTCCGCTAGCAATCGCATCATCGGTGCCAAGGACCACGCATCCATCCAGATGAACGTGGCCGAGGTGAGCTGGGAGCCCGGGAGGCGGGAAGGTTGTGATATATGTGCGGGAAAGGCAGGCTGTCCCATTGTGGAGGAGCCCCTGGGGTGAAGGTACAGGCAGAGGCTGGCTTTGAGGATTGGTGTTTCCCAAACCTGGGGGAGTGGTTTGTGACCCTTCTTCTCTTTCTAGGTTGACAAGGTCACAGGCAGGTTTAATGGCCAGTT	.	RBP	RPS21	EFTUD2	.	.	.	-90.2	0.383821	0.376015	0.395444	T8091,T20482	0.811
633	chr20	60963366	60963575	Y	+	31	861	31.4502	91.6638	86.1494	.	.	.	exon	sense	209	TGAGTCAGATGATTCCATTCTCCGATTGGCCAAGGCCGATGGCATCGTCTCAAAGTAAGGTTGGGGGCTCACATTTGGGCAGAGTGAGTGGACTAGGACTGCTCCAGAGGCGTGGTCTTAACGTTGTCCTTTTCCCCTGGTTCTAGGAACTTTTGACTGGAGAGAATCACAGATGTGGAATATTTGTCATAAATAAATAATGAAAACCT	.	RBP	RPS21	PRPF8	.	.	.	-55.6	0.287794	0.348182	0.353292	T8091,T20482	0.464
634	chr20	62153086	62153280	Y	+	8	151	8.77707	19.9263	15.1964	.	.	.	exon	sense	194	TCATGGCCACGGTGTTGGAGTCCGCAGAGCACTCGGAACCTCCCCAGGCCTCCAGCAGCATGACCGCCTGTGGCCTGGCTCGGGACGCCCCGAGGAAGCAGCCCGGCGGTCAGTCCAGCACAGCCAGCGCTGGGCCCCCGTCCTGACCTGAGCGGTTACCACCAGCCCCAGGCCTGCGGAGGCGCTAGTCCACC	.	RBP	PPDPF	DDX6	.	.	.	-80.6	0.0625979	0.168856	0.245485	No	0.302
635	chr21	20230091	20230264	Y	+	13	314	13.7933	36.4871	31.4297	.	.	.	pseudogene	sense	173	TAGCCATGGTCAACCCCACCGTGTTCTTCGACATTGCCGTCGACGGCGAGCCCTTGGGCCGCGTCTCCTTTGAGCTGTTTGCAGACAAGGTCCCAAAGACAGCAGAAAATTTTCGTGCTCTGAGCACTGGAGAGAAAGGATTTGGTTATAAGGGTTCCTGCTTTCACAGAATT	.	Long RNA	PPIAL3	.	.	.	.	-52.6	0.769879	0.83226	0.900457	No	0.183
636	chr21	26734533	26734657	Y	+	21	501	21.4118	55.4061	50.1308	.	.	.	pseudogene	sense	124	AGTTTGCCTATCTGGGGCGCCTGGCTCACGAGGTTGGCTGGAAGTACCAGGCAGTGACAGCCACCCTGGAGGAGAAGAGGAAAGAGAAAGCCAAGATCCACTACCGGAAGAAGAAACAGCTCAT	.	Long RNA	AP001340.2	.	.	.	.	-29.3	0.920484	0.991056	0.986653	No	0.48
637	chr21	30517918	30518005	Y	+	8	167	8.85014	21.5078	16.742	.	.	.	exon	sense	87	GGGGCAGCTTTGTAAGCAGCTTCGCAAGCCCTGAAACTTCTGGCTGGTAGGGATGCCAGCTAAACCAGATGGCATCAAACAGTGAAA	.	Long RNA	MAP3K7CL	.	.	.	.	-26.3	0.936333	0.693046	0.695069	T22489	0.051
638	chr21	30547029	30547376	Y	+	7	141	7.86679	18.7823	14.1002	.	.	.	exon	sense	347	CAGGAAGGAGCTCATTGCCAAGTTAGATCAGGCAGAAAAGGAGAAGGTGGATGCTGCTGAGCTGGTTCGGGAATTCGAGGCTCTGACGGAGGAGAATCGGACGTTGAGGTTGGCCCAGTCTCAATGTGTGGAACAACTGGAGAAACTTCGAATACAGTATCAGAAGAGGCAGGGCTCGTCCTAACTTTAAATTTTTCAGTGTGAGCATACGAGGCTGATGACTGCCCTGTGCTGGCCAAAAGATTTTTATTTTAAATGAATAGTGAGTCAGATCTATTGCTTCTCTGTATTACCCACATGACAACTGTCTATAATGAGTTTACTGCTTGCCAGCTTCTAGCTTGAGA	.	Long RNA	MAP3K7CL	.	.	.	.	-92	0.58511	0.533095	0.618761	No	0.489
639	chr21	31240107	31240205	Y	+	24	628	24.5343	68.2403	62.867	.	.	.	.	sense	98	tcgaaagaagaaagaaagaaagaaagaatgaaagaaagaaagaaagaaagaaggaaggaaagagagaaagagagagaaagagagaaagagagagaaag	.	Repeats	GA-rich	.	.	.	.	0	0.0105408	0.0132653	0.0142551	No	1
640	chr21	34923389	34923587	Y	+	7	117	7.73795	16.3805	11.7767	.	.	ALL_AGO|slc514_chr21|73|4|7|0.57|COORDS=chr21+:33845442;ALL_AGO|slc513_chr21|47|5|5|1.00|COORDS=chr21+:33845380;ALL_AGO|slc511_chr21|80|2|17|0.12|COORDS=chr21+:33845249	exon	sense	198	TGGAGCTTTTGGGGCAGCCTCTGGCAACAGGGGTGCTGGAGTTGCCAGGGCAGCCTGGGGCGCCAGAGTTGCCTGGGCAGCCTGTGGCAACTGTGGCGCTGGAGATCTCTGTTCAGTCTGTGGTGACAACATCGGAGCTGTCAACGATGACCGTGTCGCAGTCCCTGGAGGTGCCCTCGACGACAGCGCTGGAATCCT	.	RBP	SON	SF3A3	.	.	.	-90.1	0.970864	0.994722	0.994242	T4464	0.022
641	chr21	39617566	39617674	Y	+	48	1352	47.7863	140.959	135.238	.	.	.	.	sense	108	gagagacagagaaaggaaagaagaaagaaagaaggaaagggaagaaagaaagaaggaaaggaaagaaagaaagagagagaaagagaaaggaaggaaGGAGAAAGAGAA	.	Repeats	A-rich	.	.	.	.	0	0.0032037	0.000962963	0.00107407	No	1
642	chr21	44985212	44985307	Y	+	7	144	7.87917	19.1259	14.4314	.	.	ALL_AGO|slc8751_chr6|49|2|5|0.40|COORDS=chr6-:27883465	pseudogene	sense	95	CGCAGCCGCAAGGAGAGCTACTCCGTATACGTGTACAAGGTGCTGAAGCAGGTCCACCCCGACACCGGCATCTCCTCTAAGGCCATGGGAATCAT	.	Long RNA	CH507-42P11.1	.	Long RNA	HSF2BP	.	-22.1	0	0.998979	0.999621	T21824,T35611	0.659
643	chr21	44985367	44985497	Y	+	6	117	6.89258	16.3594	11.7635	.	.	.	pseudogene	sense	130	TTACAACAAGCGCTCGACCATCACCTCCAGGGAGATCCAGACGGCCGTGCGCCTGCTGCTGCCCGGGGAGTTGGCCAAGCACGCCGTGTCCGAGGGCACCAAGGCCGTCACCAAGTACACCAGCGCTAAG	.	Long RNA	CH507-42P11.1	.	Long RNA	HSF2BP	.	-43.9	0	0.9921	0.999992	T21824,T35611	0.35
644	chr21	45196122	45196215	Y	-	6	106	6.84528	15.2319	10.6874	.	.	ALL_AGO|slc2877_chr21|54|11|20|0.55|COORDS=chr21-:44020569	exon	sense	93	GGGCTGAGGAGCCGCCGCGTCCCCTCGCCGAGTCCCCTCGCCAGATTCCCTCCGTCGCCGCCAAGATGATGTGCGGGGCGCCCTCCGCCACGC	.	RBP	CSTB	DDX6	.	.	.	-32.8	0.101462	0.0262258	0.0779462	No	0.905
645	chr21	45758691	45758767	Y	+	5	60	5.66431	10.2426	6.05084	.	.	.	.	sense	76	cccgccccggctcctccctccggctccgccctcgtcccgccccggctcctccctccggctccgccctcgtcccgcc	.	Repeats	C-rich	.	.	.	.	-12.5	0	0.00464474	0.00484211	No	0.589
646	chr21	48119815	48119896	Y	-	12	155	11.2241	20.2677	15.5649	.	.	.	Intergenic	sense	81	Nccctaaccctaaccctaaccctaacccaaccctaaccctaaccctaaccctaaccctaaccctaaccctaaccctaaccc	.	Repeats	(TTAGGG)n	.	.	.	.	0	0	0	0	No	1
647	chr22	17082783	17083161	Y	+	6	104	6.83609	15.053	10.4995	.	.	.	exon	sense	378	gctcgctcCATGTTGCCGCCTCTCCCGGTACCTGCTGCTGCTCCCGGGGCTTCGGGAAATGCGAGAGTCTGAGCCGGGGAGGAGGAACCCGAgcagcggcggcggcggccgcggcggcggGAGCCCCCCAAGAGGAGGACCGGGATCCATGTGTCTTTCCTGGTGACTAGGATGTCGTCGGAGGAGAACAAGTGCGTGGAGCAGCCGCAGCCACCACCCCCCGAGGAGCCTGGAGCCCCGGCCCCGAGCCCCCCAGCCGCAGACAAAAGACCTCGGGGCCGGCCTCGCAAGGCGCTTCCCCTTTCCAGAGAGCCAGAAAGAAGTAAGTTGAGTGCGAGGGAGCCAGGCCGGGAGCCAgcggcggcgccgggccggagc	.	RBP	TPTEP1	SRSF1	.	.	.	-174.9	0.228749	0.233646	0.974193	No	0.639
648	chr22	18581321	18581418	Y	+	12	255	12.678	30.5419	25.5827	.	.	.	.	sense	97	tgggaggcagaggttgcagtgagctgagatcctgccactgcactccagtctgggcgacagagtgagattctgtctcaaaaaaaagaaaaaagaaaaa	.	Repeats	AluSg	.	.	.	.	-31.8	0.283052	0.0184536	0.0217732	No	0
649	chr22	19711833	19712294	Y	+	11	229	11.7028	27.8327	22.92	.	.	.	exon	sense	461	GCTGCTGGGCCTTGGGCTGCTGCACGCGTTGCTGCTGGTGCTGCTGCTGTGCCGCCTGCGGAGGCTgcgggcccgggcccgcgctcgcgccgcagcccggcTGTCGCTGACCGACCCGCTGGTGGCCGAGCGAGCCGGAACCGACGAGTCCTGAGGAGAGAACCGGTGCGTCCTGAGGAGAGAACCGGCGCTGGGCAACACGGGCCTGCAAACTCGACAGGACCCTGCCCGAGGGGCCCTCGCGCCAACCTGGACCGGTCCCCGCCTCCTCCGCTGCCCAATCTCTCAGACCCACCCCACCTGCAGGCCCAGACCACGTGGGACAGAACTCCTGCCCACCCTACCCCGAGGGAGGCGAACCCGCACTTCCAGGCTTGGGAGGACCATGGGGCACAATGC…	.	Long RNA	GP1BB	.	.	.	.	-190.5	0.195347	0.150531	0.151952	T10010	0.98
650	chr22	24349641	24349711	N	+	14	347	14.7916	39.8882	34.7761	.	.	.	Intergenic	unannotated	70	CAGTAAGGACAGCTAAGTAAGCTATTGGGCCCATACCCTGAAAATGTTGGTTATACCCTTCCTATACTAA	.	Unannotated	.	.	Unannotated	.	.	-12	0	0	0	No	0.244
651	chr22	24757796	24757879	Y	+	10	230	10.8471	27.9684	23.0443	.	.	.	.	sense	83	CGAGAGAGagagaaagaagaagaagaggaagaggaaggaggagaaggaggaggaaaaagaagaaaaaagaagagaaaagaaaa	.	Repeats	GA-rich	.	.	.	.	0	0.0234096	0.0236386	0.0255904	No	1
652	chr22	29234363	29234437	Y	+	11	229	11.7028	27.8327	22.92	.	.	.	.	sense	74	tggaggAGGAaaagaaagaaaggaaagagagagaggaaagaaagagaaagagagagagaaagaaagagagaaag	.	Repeats	A-rich	.	.	.	.	0	0.129622	0.129338	0.137284	No	1
653	chr22	36234533	36234703	Y	-	18	375	18.1782	42.6551	37.56	.	.	.	intron	sense	170	TGAGAGCCAAGTGGAGGAAGAAGCGAATGCGCAGGCTGAAGCGCAAAAGAAGAAAGATGAGGCAGAGGTCCAAGTAAACCGCTAGCTTGTTGCACCGTGGAGGCCACAGGAGCAGAAACATGGAATGCCAGACGCTGGGGATGCTGGTACAAGTTGTGGGACTGCATGCT	.	Long RNA	RBFOX2	.	.	.	.	-39.7	0.693376	0.454006	0.605712	No	0.582
654	chr22	36677694	36678000	Y	-	6	86	6.69725	13.1333	8.69951	.	.	.	exon	sense	306	CTGCCACAGCAAGGCTGTCGGGGTCAAGCTGGAAAGGCCAGCAGCCTTCCAGTGGCTTCTCCCAACACTCTTGGGGACCAAATATATTTAATGGTTAAGGGACTTGTCCCAAGTCTGACAGCCAGAGCGTTAGAGGGGCCAGCGGCCCTCCCAGGCGATCTTGTGTCTACTCTAGGACTGGGCCCGAGGGTGGTTTACCTGCACCGTTGACTCAGTATAGTTTAAAAATCTGCCACCTGCACAGGTATTTTTGAAAGCAAAATAAGGTTTTCTTTTTTCCCCTTTCTTGTAATAAATGATAAAATT	.	RBP	MYH9	FAM120A	.	.	.	-92.3	0.520111	0.323958	0.307801	T325	0.069
655	chr22	36680191	36680296	Y	-	8	156	8.80107	20.3811	15.6659	.	.	.	exon	sense	105	ACCCGCCTGAAGCAGCTCAAGCGGCAGCTGGAGGAGGCCGAAGAGGAGGCCCAGCGGGCCAACGCCTCCCGCCGGAAACTGCAGCGCGAGCTGGAGGACGCCACT	.	RBP	MYH9	ZRANB2	.	.	.	-43.6	0.930543	0.98359	0.930924	T323	0.053
656	chr22	36688101	36688219	Y	-	6	113	6.87758	15.9563	11.3992	.	.	.	exon	sense	118	TGAAGAGGAAGCTCCAGAAGGACCTGGAGGGCCTGAGCCAGCGGCACGAGGAGAAGGTGGCCGCCTACGACAAGCTGGAGAAGACCAAGACGCGGCTGCAGCAGGAGCTGGACGACCT	.	RBP	MYH9	TRA2A	.	.	.	-35.3	0.93522	0.958602	0.906907	No	0.419
657	chr22	36696995	36697066	Y	-	5	90	5.9014	13.526	9.0791	.	.	.	exon	sense	71	AGGCAGAAACCGAGCTGTGTGCCGAGGCTGAGGAGCTCCGGGCCCGCCTGACCGCCAAGAAGCAGGAATTA	.	RBP	MYH9	FMR1	.	.	.	-18.7	0.887028	0.923324	0.932831	No	0.635
658	chr22	37875432	37875504	Y	-	15	326	15.5319	37.6673	32.633	.	.	.	exon	sense	72	TGAACCCAAGGGCGCTGCTGCAGCTTCTGAGAGCCTTCCCGCTGGCCCGCGACGTCTATGTGGGAAGGCCCA	.	Long RNA	MFNG	.	.	.	.	-26.6	0.18525	0.47325	0.568	No	0.233
659	chr22	38273939	38274105	Y	+	6	83	6.6616	12.7808	8.35334	.	.	.	exon	sense	166	TGTTTTCTGATGAAGTACAGCAGCAGGCCCAGCTTTCAACCATCCGCAGCTTCCTGAAGCTCTACACCACCATGCCTGTGGCCAAGCTGGCTGGCTTCCTGGACCTCACAGAGCAGGAGTTCCGGATCCAGCTTCTTGTCTTCAAACACAAGATGAAGAACCTCGT	.	RBP	EIF3L	IGF2BP3	.	.	.	-45	0.904892	0.911392	0.965235	No	0.144
660	chr22	39415415	39415760	Y	+	5	80	5.85095	12.4301	8.01899	.	.	.	.	sense	345	gtgaacaccatccggactccgtgtatgtctcaaattacaattctttctttgcaaatgaaatatgaaatttagaggctcttctaaacactttaaatttgatttgacaTTTTCAAAGCAGATGTAAGTTTTAGAGAATGAGATTCTCCATAAAAATGACCCTTTCAtgctgtggcctccatagaagatgtcccaggccaggtgcccacatggcaggcatttattttctcacagatctggaagctgcaggtccaacttcgaggggtgggtggggttgtttcctctgaggccgctccttctggctggcagggagtctcttccagccgtgtcctctgtggcctttcctct	.	Repeats	MLT1B	.	.	.	.	-98.2	0.0200609	0.0208	0.0247101	No	0.069
661	chr22	39708904	39709310	Y	-	5	83	5.86738	12.7408	8.31952	.	.	ALL_AGO|slc2454_chr21|49|1|64|0.02|COORDS=chr21-:36463120	exon	sense	406	GCTGGTGCAGACGAAGCGGCGGGCTCTGGAGAAGATTGACCTTAAGTTCATTGACACCACCTCCAAGTTTGGCCATGGCCGCTTCCAGACCATGGAGGAGAAGAAAGCATTCATGGTGAGCACCTCTGCCTGCCCCCCTCGCTGGGTGTGGTGGCTTGGGCAGCCGCCTGCCTTTGGCTCCAGCCGGGGTAGGGGTGGTCTTGATGCCTTAGGCCTCTCTTGTGGCTGTGGAGACTGGCCCAGAGTCTTGGTCTCCTCTAGAGTGGGCATCTGCTGTCACCTGTCATCTTCTACCTCTGACCACTGCCTCTCTCCCCACAGGGACCACTGAAGAAAGACCGAATTGCAAAGGAAGAAGGAGCTTAATGCCAGGAACAGATTTTGCAGTTGGTGGGGTCT…	.	RBP	RPL3	BUD13	.	.	.	-140.3	0.4393	0.420429	0.427786	T15713,T22077,T21764,T21927,T315,T22762	0.766
662	chr22	39710690	39710780	Y	-	9	187	9.80454	23.5713	18.7805	.	.	.	exon	sense	90	ATTGGGGCATGGCATCCTGCTCGTGTAGCCTTCTCTGTGGCACGCGCTGGGCAGAAAGGCTACCATCACCGCACTGAGATCAACAAGAAG	.	RBP	RPL3	YBX3	.	.	.	-26.8	0.964344	0.946644	0.9523	No	0.289
663	chr22	39711378	39711559	Y	-	17	380	17.4734	43.1949	38.0946	.	.	.	exon	sense	181	TGCGCCTGCTTCCTCTGCGCCAGAAGAAGGCCCACCTGATGGAGATCCAGGTGAACGGAGGCACTGTGGCCGAGAAGCTGGACTGGGCCCGCGAGAGGCTTGAGCAGCAGGTACCTGTGAACCAAGTGTTTGGGCAGGATGAGATGATCGACGTCATCGGGGTGACCAAGGGCAAAGGCTA	.	RBP	RPL3	ZNF622	.	.	.	-60	0.935541	0.965873	0.956569	T314	0.672
664	chr22	39712710	39712815	Y	-	8	166	8.84549	21.3865	16.6581	.	.	.	exon	sense	105	TACTGCAAGAAATGGCAGGATGAGGATGGCAAGAAGCAGCTGGAGAAGGACTTCAGCAGCATGAAGAAGTACTGCCAAGTCATCCGTGTCATTGCCCACACCCAG	.	RBP	RPL3	ZNF622	.	.	.	-31.9	0.932771	0.934857	0.947048	T314	0.011
665	chr22	39713464	39713613	Y	-	16	395	16.7152	44.623	39.5111	.	.	.	exon	sense	149	TGGAGGCTGTGACCATTGTAGAGACACCACCCATGGTGGTTGTGGGCATTGTGGGCTACGTGGAAACCCCTCGAGGCCTCCGGACCTTCAAGACTGTCTTTGCTGAGCACATCAGTGATGAATGCAAGAGGCGTTTCTATAAGAATTGG	.	RBP	RPL3	SUB1	.	.	.	-43.3	0.79555	0.933973	0.954664	T314,T15787,T17442	0.447
666	chr22	40342902	40343127	Y	+	9	165	9.67244	21.2756	16.5228	.	.	.	exon	sense	225	GACCTAGATCCTATAGATTCCGGCAGCTCTTCCTGCAAACACAAGCCCTTGTTGTGTGCCTGAGCCTTGCTCTCCGGCCTGGAGACATCCATCTGCCCACTCTCCTAGGAACTGCTGATTACCAGGAAGCACCATCGGCTCTGCTGCCCTCCCCCTGGCAGAGAGGCACAATGACCACATTATTTCTCTTCCAGCTTCACGTTACAGCATGGAAGCTGTTGCCAA	.	RBP	GRAP2	SND1	.	.	.	-62.3	0.314649	0.204187	0.173329	T16167	0.061
667	chr22	41650376	41650486	Y	-	14	255	14.1473	30.4391	25.5247	.	.	.	.	sense	110	cgaggaggaggaggaggaaggagaagaggaagaagaggaagcagaagaagaggaggaggaagatgaggaagaggaggaagaagaggaggaggaggaggaagaagagCCTC	.	Repeats	CT-rich	.	.	.	.	-3.6	0.0628909	0.236836	0.287355	No	0.045
668	chr22	42997234	42997401	Y	+	15	317	15.4759	36.8584	31.7893	.	.	.	.	sense	167	ggccgggcgcggtggctcacacctgtaatcccagctctcagggaggctaagaggcgggaggatagcttgagcccaggagttcgagacctgcctgggcaatatagcgagaccccgttctccagaaaaaggaaaaaaaaacaaaacaaaagacaaaaaaaaaaaaagcg	.	Repeats	FLAM_C	.	.	.	.	-46.8	0.169114	0.163737	0.166958	No	0.006
669	chr22	43172418	43172645	Y	-	5	90	5.90195	13.5408	9.09234	.	.	.	pseudogene	sense	227	AAGAAACAGTTCTCTCAATACATAAAGAACAGCGTAACTCCAGACATGATGGAGGAGATGTATAAGAAAGCTCATGCTGCTATACGAGAGAATCCAGTCTATGAAAAGAAGCCCAAGAAAGAAGTTAAAAAGGAGAGGTGGAACCTTCCCAAAATGCCCCTTGCTCAGAAGAAGGATCAGGTAGCTCAAAAGAAGGCAAGCTTCCTCAGAGCTCAGGAGCGGGCTGC	.	Long RNA	AL049757.3	.	.	.	.	-54.3	0.699079	0.80141	0.985996	No	0.015
670	chr22	45402989	45403114	Y	-	6	113	6.87694	15.9402	11.3831	.	.	.	.	sense	125	TTGGGGGGGGCCGGGCTTGCTGAAAGGAAGATGGCAGTGCCGCGGCCCGCGCCTGGTCTGGGCCGCCGGGCTGGACCGAAGGCTTGGGACAAATGCGCTAACCCTTTTCAGTTGGTgccgcggcc	.	Repeats	GC_rich	.	.	.	.	-57.3	0.074912	0.111136	0.191096	No	0.197
671	chr3	12877546	12877714	Y	-	31	843	31.3716	89.7744	84.3137	.	.	ALL_AGO|slc1594_chr7|47|11|22|0.50|COORDS=chr7+:44474288	exon	sense	168	GTGCCGAGATCGCTCACAATGTTTCCTCCAAGAACCGCAAAGCCATCGTGGAAAGAGCTGCCCAACTGGCCATCAGAGTCACCAACCCCAATGCCAGGCTGCGCAGTGAAGAAAATGAGTAGGCAGCTCATGTGCACGTTTTCTGTTTAAATAAATGTAAAAACTGCC	.	RBP	RPL32	LARP4	Long RNA	CAND2	.	-33.7	0.871577	0.791768	0.790018	T3189,T19011,T15031,T18404,T21090	0.795
672	chr3	16489456	16489520	Y	-	9	170	9.70745	21.7807	17.0399	.	.	.	.	sense	64	atggaagggaggaagaaaagaaaaaagagagaaaagaaggagagaggaagagagggaagaaaTA	.	Repeats	polypyrimidine	.	.	.	.	0	0.02125	0.00110937	0.00129688	No	1
673	chr3	19988681	19988809	Y	+	5	92	5.90851	13.7236	9.23874	.	.	.	exon	sense	128	TGAAGGAGCCGGCGGCTGGCCTTAggggaggaggcagagggaggaggaggaggaagaattagtcggaactccagcgccggcggcggcggcggcggcggaggaggagaaaggaaagaggaagggggagc	.	RBP	RAB5A	DDX3X	.	.	.	-33.9	0.598164	0.853234	0.811523	No	0.022
674	chr3	23959401	23959520	Y	+	7	104	7.61326	14.9784	10.4253	.	.	.	exon	sense	119	GTCATGCGCTTTCTTCTGAGGGTCCGCTGCTGGCAGTACCGCCAGCTCTCTGCTCTCCACAGGGCTCCCCGCCCCACCCGGCCTGATAAAGCGCGCCGACTGGGCTACAAGGCCAAGCA	.	RBP	RPL15	GRWD1	Long RNA	NKIRAS1	.	-42.6	0.56184	0.909353	0.951975	No	0.131
675	chr3	23959944	23960034	Y	+	9	165	9.67244	21.2756	16.5228	.	.	.	exon	sense	90	AGGATTCGTGTTCGCCGTGGTGGCCGAAAACGCCCAGTTCCTAAGGGTGCAACTTACGGCAAGCCTGTCCATCATGGTGTTAACCAGCTA	.	RBP	RPL15	YBX3	Long RNA	NKIRAS1	.	-25.2	0.607289	0.957367	0.960233	No	0.307
676	chr3	23960684	23961038	Y	+	33	931	33.4339	98.7006	93.149	.	.	.	exon	sense	354	AGGAGCGAGCTGGACGCCACTGTGGGGCTCTGAGAGTCCTGAATTCTTACTGGGTTGGTGAAGATTCCACATACAAATTTTTTGAGGTTATCCTCATTGATCCATTCCATAAAGCTATCAGAAGAAATCCTGACACCCAGTGGATCACCAAACCAGTCCACAAGCACAGGGAGATGCGTGGGCTGACATCTGCAGGCCGAAAGAGCCGTGGCCTTGGAAAGGGCCACAAGTTCCACCACACTATTGGTGGCTCTCGCCGGGCAGCTTGGAGAAGGCGCAATACTCTCCAGCTCCACCGTTACCGCTAATATAAGTAAAGTTTGTAAAATTCATACTTAATAAACAATTTAGGAC	.	RBP	RPL15	LARP4	Long RNA	NKIRAS1	.	-109	0.883316	0.968167	0.961136	T19038,T8699	0.008
677	chr3	30669073	30669231	Y	+	7	141	7.86679	18.7823	14.1002	.	.	.	intron	sense	158	TCTAAGATGGTCTTAGATCcactgttcaatagaactttctgcagagatgaaaatatcttatacctgggctgtGTTAAGGTTTAAggacagcactggtataagatattttcacctttgcaggaagttctattgaacagtgGGTCTGAGACCATCTTAGA	.	RBP	TGFBR2	ILF3	.	.	.	-113	0.0190823	0.00676582	0.00787342	No	0
678	chr3	32676708	32676910	N	-	8	172	8.8664	21.963	17.2118	.	.	ALL_AGO|slc7680_chr8|64|3|6|0.50|COORDS=chr8-:99124111;ALL_AGO|slc8228_chr3|42|30|45|0.67|COORDS=chr3-:32651745	pseudogene	sense	202	GCTAACAACTGCTCAGCTTTGAGGAAATCCGAAATAGAGTACTATGCAATGTTGGCCAAAACTGGTGTCCATCACTACAGTGGCAATAATATTGAACTGGGCACAGCATGTGGAAAATACTACAGAGTGTGCACACTGGCTATCATTGATCCAGGTGACTCTGACATCGTTAGAAGCACGCCAGAACAAACTGGTGAAAAGT	.	Long RNA	AC138972.1	.	.	.	.	-55.6	0	0	0	No	0.004
679	chr3	39453387	39453548	Y	+	13	300	13.7392	35.0515	30.0182	.	.	.	exon	sense	161	TTGAAAAAGAAGAGCAGGCTGCTGCTGAGAAGGCAGTGACCAAGGAGGAATTTCAGGGTGAATGGACTGCTCCCGCTCCTGAGTTCACTGCTACTCAGCCTGAGGTTGCAGACTGGTCTGAAGGTGTACAGGTGCCCTCTGTGCCTATTCAGCAATTCCCT	.	RBP	RPSA	LIN28B	.	.	.	-53.2	0.920242	0.944118	0.964845	T23233,T4578,T25186	0.076
680	chr3	40503530	40503775	Y	+	20	532	20.7082	58.5865	53.2798	.	.	.	exon	sense	245	tgctgctgctgctgctgctgctAAAGTTCCAGCAAAAAAGATCACCGCCGCGAGTAAAAAGGCTCCAGCCCAGAAGGTTCCTGCCCAGAAAGCCACAGGCCAGAAAGCAGCGCCTGCTCCAAAAGCTCAGAAGGGTCAAAAAGCTCCAGCCCAGAAAGCACCTGCTCCAAAGGCATCTGGCAAGAAAGCATAAGTGGCAATCATAAAAAGTAATAAAGGTTCTTTTTGACCTGTTGACAAATGTA	.	RBP	RPL14	DDX6	.	.	.	-56.8	0.573437	0.595743	0.630147	T23406,T14873,T17053,T7571	0.278
681	chr3	40803001	40803340	Y	+	19	501	19.7221	55.4132	50.1308	.	.	.	pseudogene	sense	339	ttttccggcagtgacgacctacccacacgagaacatgcctctcgcaaaggatctccttcatccctctccagaagaggagaagaggaaacacaagaagaaaggcctggtgcagagccccaattcctacttcatggatgtgaaatgcccaggatgctataaaatcaccacggtctttagccatgcacaaacggtagttttgtgtgttggctgctccactgtcctctgccagcctacaggaggaaaagcaaggcttacagaaggatgttccttcaggaggaagcagcactaaaagcactctgagtcaagatgagtgggaaaccatctcaataaacacatttt	.	Long RNA	RP11-761N21.2	.	.	.	.	-89.7	0	0	0	T21128	0.182
682	chr3	49394632	49395154	Y	-	8	156	8.80107	20.3811	15.6659	.	.	ALL_AGO|slc9078_chr3|47|1|7|0.14|COORDS=chr3-:49369648	exon	sense	522	GAATTCCCTCAAGTACGTCCGGCCTGGTGGTGGGTTCGAGCCCAACTTCATGCTCTTCGAGAAGTGCGAGGTGAACGGTGCGGGGGCGCACCCTCTCTTCGCCTTCCTGCGGGAGGCCCTGCCAGCTCCCAGCGACGACGCCACCGCGCTTATGACCGACCCCAAGCTCATCACCTGGTCTCCGGTGTGTCGCAACGATGTTGCCTGGAACTTTGAGAAGTTCCTGGTGGGCCCTGACGGTGTGCCCCTACGCAGGTACAGCCGCCGCTTCCAGACCATTGACATCGAGCCTGACATCGAAGCCCTGCTGTCTCAAGGGCCCAGCTGTGCCTAGGGCGCCCCTCCTACCCCGGCTGCTTGGCAGTTGCAGTGCTGCTGTCTCGGGGGGGTTTTCATCTA…	.	Long RNA	GPX1	.	.	.	.	-197.3	0.420843	0.52542	0.564642	T37534,T17329	0.261
683	chr3	49395463	49395754	Y	-	6	118	6.89609	16.4617	11.8784	.	.	.	exon	sense	291	TGCTTGTTCGGGGCGCTCCGCTGGCTTCTTGGACAATTGCGCCATGTGTGCTGCTCGGCTAgcggcggcggcggcggcggcCCAGTCGGTGTATGCCTTCTCGGCGCGCCCGCTGGCCGGCGGGGAGCCTGTGAGCCTGGGCTCCCTGCGGGGCAAGGTACTACTTATCGAGAATGTGGCGTCCCTCTGAGGCACCACGGTCCGGGACTACACCCAGATGAACGAGCTGCAGCGGCGCCTCGGACCCCGGGGCCTGGTGGTGCTCGGCTTCCCGTGCAACCAGTTTGGGCA	.	RBP	GPX1	DDX55	.	.	.	-137.3	0.671976	0.667333	0.709457	T37534	0.638
684	chr3	49397067	49397285	Y	-	6	98	6.79521	14.3602	9.83407	.	.	.	exon	sense	218	TATCTGTCAGCTGCAAGGTACTCTGGTGAGTCACCACTTCAGGGCTTTACTCCGTAACAGATTTTGTTGGCATAGCTCTGGGGTGGGCAGTTTTTTGAAAATGGGCTCAACCAGAAAAGCCCAAGTTCATGCAGCTGTGGCAGAGTTACAGTTCTGTGGTTTCATGTTAGTTACCTTATAGTTACTGTGTAATTAGTGCCACTTAATGTATGTTACCA	.	RBP	RHOA	UPF1	.	.	.	-66.2	0.82989	0.681147	0.652055	T17214	0.007
685	chr3	50296475	50296762	Y	+	7	139	7.85945	18.593	13.9245	.	.	.	exon	sense	287	GCTGGCCGCCCCCGTGCGAGCGGCACCCCTGCCCTGCCCTCCACAGAATTGGGTTCCAAGGGCTGTTCCAGACAACTGCCAACGTCACTGAGGGCCCTGCCCCAGCGGCCCTGGCCCCAGGCTCTATTAACCTAAAATGTAGCTCCCTAGCGCTAACCTAGGAACCGCCGCTGCCTGCTGGGGGGCCACGCCCCTCATGCCCTTGTCCCAGGCCCGGGGCCTTCAGCGTTGAACACTTCCTTGCTTTTTTCACATGTTTTATGGAATTGTTCACCTGGTTTGAAATA	.	RBP	GNAI2	QKI	.	.	.	-103.5	0.881293	0.832791	0.83354	T19550	0.01
686	chr3	51429405	51429482	Y	+	5	72	5.80346	11.6914	7.29648	.	.	.	exon	sense	77	CGCACGCGAGGCCCGCCAGCACGCCCTGGCCCGGCAGCTGCTGCTCTACGACCGCCCGCTCAAGGTAGAGCCCGTGT	.	RBP	RBM15B	SLTM	.	.	.	-26.7	0.976597	0.977377	0.98526	No	0.719
687	chr3	52027664	52028117	Y	-	17	349	17.2215	40.0315	34.97	.	.	.	exon	sense	453	TGCGCTTTGCCAAGAAGCACAACAAAAAGGGCCTAAAGAAGATGCAGGCCAACAATGCCAAGGCCATGAGTGCACGTGCCGAGGCTATCAAGGCCCTCGTAAAGCCCAAGGAGGTTAAGCCCAAGATCCCAAAGGGTGTCAGCCGCAAGCTCGATCGACTTGCCTACATTGCCCACCCCAAGCTTGGGAAGCGTGCTCGTGCCCGTATTGCCAAGGGGCTCAGGCTGTGCCggccaaaggccaaggccaaggccaaggccaaggATCAAACCAAGGCCCAGGCTGCAGCCCCAGCTTCAGTTCCAGCTCAGGCTCCCAAACGTACCCAGGCCCCTACAAAGGCTTCAGAGTAGATATCTCTGCCAACATGAGGACAGAAGGACTGGTGCGACCCCCCAC…	.	RBP	RPL29	DHX30	.	.	.	-162.8	0.483453	0.587711	0.581642	No	0.014
688	chr3	52265011	52265142	Y	-	16	312	16.1483	36.2963	31.2879	.	.	.	intron	sense	131	GTGGGTGGGGAGCAGAGGCCCCAGCCTTGAGCCCTCAGGGTCATATCGGCCCAGTGGCAGCCTGTGCTGCCTGGGAGCCACACCCTGCTTTGGGCCGGTGAGGGCCTCCCTCACCATTCCCCTACCCACAG	Y	RBP	TWF2	SF3A3	.	.	.	-72.7	0.14574	0.0882061	0.0938092	No	0
689	chr3	61728177	61728751	N	-	8	137	8.67327	18.3904	13.7435	.	.	.	pseudogene	sense	574	ACGAGGCGGTGCGGGAAGTCCTGCACCGGAACCAGCGCAAGCGCCGCAAGTTCCTGGAGACGGTGGAGTTGCAGATCAGCTTGAAGAACTATGACCCCCAGAAGGACAAGTGCTTCTCGGGCACCGTCAGACTTAAGTCCACTCCCCGCCCTAAGTTGTGTGTGTGTGTCCTGGGGGACCAGCAGCACTGTGACGAGGCTAAGGCCGTGGATATCCCCCACATGGACATCGAGGCGCTGAAAAAACTCAAAAAGAATAAAAAACTGGTCAAGAAGCTGGCCAAGAAGTATGATGCGTTTTTGGCCTCAGAGTCTCTGATCAAGCAGATTCCACGAATCCTCGGCCCAGGTCTAAATAAGGCAGGAAAGTTCCCTTCCCTGCTCACACACAACGAAAACA…	.	Long RNA	RPL10AP6	.	Long RNA	PTPRG	.	-191.9	0	0	0	No	0.017
690	chr3	69151009	69151139	Y	+	5	94	5.91663	13.9689	9.44617	.	.	.	exon	sense	130	TGATCCTGGGAGGAATCGTGGTGGTGCTGGTGTTCACAGGGTTTGTGTGGGCAGCCCACAATAAAGACGTCCTTCGCCGGATGAAGAAGCGCTACCCCACGACGTTCGTTATGGTGGTCATGTTGGCGAG	.	RBP	ARL6IP5	DDX3X	.	.	.	-41	0.148631	0.7999	0.872908	No	0.576
691	chr3	99667569	99667654	Y	+	16	394	16.7169	44.6697	39.4954	.	.	.	.	sense	85	tggaagggaaggaaaggaaaaaagaggaaaaggaaggaaggaaagaaaaagagaaaggaaagaaaaagagaagaaagaagagAGC	.	Repeats	A-rich	.	.	.	.	0	0.22	0.217412	0.257129	No	1
692	chr3	101295295	101295506	Y	-	47	1385	47.1276	144.264	138.587	.	.	.	exon	sense	211	AGCCAGGTCCTAGCCAATGGTCTGGACAACAAGCTCCGTGAAGACCTGGAGCGACTGAAGAAGATTCGGGCCCATAGAGGGCTGCGTCACTTCTGGGGCCTTCGTGTCCGAGGCCAGCACACCAAGACCACTGGCCGCCGTGGCCGCACCGTGGGTGTGTCCAAGAAGAAATAAGTCTGTAGGCCTTGTCTGTTAATAAATAGTTTATATA	.	RBP	PCNP	PUS1	Long RNA	PCNP	.	-70.5	0.845175	0.749578	0.891668	No	0.145
693	chr3	114578064	114578256	Y	-	17	403	17.6021	45.4407	40.3204	.	.	.	.	sense	192	cgagaaaagaaaaggaagaaggaaggaaggaaggaagaaaggaaggagaagagagggagagaggaaaaaggaaagaagaaaggaaggaaggcaagaaggaaggaaggaaagaaggaaggaagaaaggaaggaaggaagaatggaaggaaggaggaaaagaaagaagaaaggaaggaaagaaggaaggaagga	.	Repeats	(TTCC)n	.	.	.	.	0	0.0102552	0.00158333	0.00186979	No	1
694	chr3	138545087	138545173	Y	+	9	177	9.7523	22.5216	17.7198	.	.	.	pseudogene	sense	86	GGTGTCATCAAAGCAGTGGACAAGAAGGCTGCTGGAGCTGGCAAGGTCACCAAGTCTGCCCAGAAAGCTCAGAAGGCTAAATGAAT	.	Long RNA	RP11-117F22.2	.	Long RNA	PIK3CB	.	-18.8	0.273523	0.271465	0.993849	No	0.359
695	chr3	142262470	142262537	Y	-	31	825	31.2872	87.9859	82.5361	.	.	.	.	sense	67	tcGagagaggaagaaaagaagaggagagaaaagaaaaaagagagagaaaggaggaaagaaagaaata	.	Repeats	T-rich	.	.	.	.	0	0.0274627	0.0275224	0.0322537	No	1
696	chr3	143483801	143484019	Y	-	21	520	21.5137	57.2686	52.0307	.	.	.	.	sense	218	tgagggagggaggaaagaaagaaagagagaaagaaagaaaaagaaagaaagagagaaagaaagaaaaagagggaaagaaagaaagagagaaagaaaaagaaagagagaaaaagagggaaagaaagaaagaaaaagaaagagaaagagagaaagaaagagaaagagagaaagaaagaaaggaaggaaggaaggaaggaaggaaggaaagaaagagaaac	.	Repeats	T-rich	.	.	.	.	0	0.0227064	0.0226376	0.0247431	No	1
697	chr3	150263959	150264190	Y	-	7	145	7.88124	19.1868	14.5188	.	.	.	exon	sense	231	CGGCGGCGCGAGAACGACCCGGCGGCCAGTTCTCTTCCTCCTGCGCACCTGCCCCGCTCGGTCAGTCAGTCGGCGGCCGGCGCCCGGCTTGTGCTCAGACCTCGCGCTTGCGGCGCCCAGGCCCAGCGGCCGTAGCTAGCGTCTGGCCTGAGAACCTCGGCGCTCCGGCGGCGCGGGCACCACGAGCCGAGCCTCGCAGCGGCTCCAGAGGAGGCAGGCGAGTGAGCGAGT	.	RBP	SERP1	MTPAP	.	.	.	-106.3	0.100537	0.112892	0.0808139	No	0.987
698	chr3	161146863	161147398	Y	-	42	1276	42.4311	133.311	127.674	.	.	.	pseudogene	sense	535	CCCTTTTCACAACATGGCGCCGAAAGCGAAGAAGGAAGCTCCTGCCCCTCCTAAAGCTGAAGCCAAAGCGAAGGCTTTAAAGGCCAAGAAGGCAGTGTTGAAAGGTGTCCACAGCCACAAAAAGAAGAAGATCCGCACGTCACCCACCTTCCGGCGGCCGAAGACACTGCGACTCCGGAGACAGCCCAAATATCCTCGGAAGAGCGCTCCCAGGAGAAACAAGCTTGACCACTATGCTATCATCAAGTTTCCGCTGACCACTGAGTCTGCCATGAAGAAGATAGAAGACAACAACACACTTGTGTTCATTGTGGATGTTAAAGCCAACAAGCACCAGATTAAACAGGCTGTGAAGAAGCTCTATGACATTGATGTGGCCAAGGTCAACATCCTGATTCG…	.	Long RNA	RP11-3P17.3	.	Long RNA	RP11-3P17.5	.	-132	0.811207	0.91625	0.954441	T22527	0.422
699	chr3	169201421	169201742	Y	-	8	145	8.7367	19.2596	14.5847	.	.	.	pseudogene	sense	321	ATGCTGCCAATTTTGAGCAGTTTTTGCAAGAAAGGATCAAAGTGAACGGAAAAGCTGGGAACCTTGGTGGAGGGGTGGTGACCATCGAAAGGAGCAAGAGCAAGATCACCGTGACATCCGAGGTGCCTTTCTCCAAAAGGTATTTGAAATATCTCACCAAAAAATATTTGAAGAAGAATAATCTACGTGACTGGTTGCGCGTAGTTGCTAACAGCAAAGAGAGTTACGAATTACGTTACTTCCAGATTAACCAGGACGAAGAAGAGGAGGAAGACGAGGATTAAATTTCATTTATCTGGAAAATTTTGTATGAGTTCTTGA	.	Long RNA	RP11-641D5.1	.	.	.	.	-76.6	0.898212	0.923717	0.990165	No	0.062
700	chr3	176915042	176915261	Y	-	6	121	6.90739	16.8161	12.1984	.	.	.	.	sense	219	GGCTCTTTCCCTTAGTAACAGCTTTTACCTTCTGCCTCAATTCCTCTccccgctcgcgcccttcccccgcgcgccgcctccccccgccgccggccgcgtgcgcccccgcccctccccccgcggcgggagcacctccgctcgccacctggggacccgcgccgcgctccccgcccccgcccgcccggcgcccatcccccgcgccctccGCTCGCTGGGGTT	.	Repeats	G-rich	.	.	.	.	-75	0.710749	0.807626	0.797046	No	0.065
701	chr3	183867711	183868278	N	+	21	508	21.4551	56.1553	50.8676	.	.	.	pseudogene	sense	567	AGAAGAGGTTTGGCTTTCCAGAGGGCAGTGTAGAGCTTTATGCTGAAAAGGTTGCCACTAGAGGTCTGTGTGCCATTGCCCAGGCAGAGTCTCTGCGTTACAAACTCCTAGGAGGGCTTGCTGTGTGGAGGGCCTGCTATGGTGTGCTGCGGTTCATCATGGAGAGTGGGGCCAAAGGCTGCAAGGTCATGGCGTCTGGGAAACTCCGAGGACAGAGGGCTAAATCCATGAAGTTTGTGGATGGCCTGACGATCCACAGTGGAGACCCTATTAACTACTACGTTGGCACTGCTGTGTGCCACGTGTTGCTCAGACAGGGTGTGCTGGGCATCAAGGTGAAGATCATGCTGCCCTGGGACCCAACTGGTAAGACTGGCCCTAAGAAGCCCCTGCCTGACC…	.	Long RNA	RP11-778D9.4	.	.	.	.	-210.6	0	0	0	No	0.038
702	chr3	185135433	185135700	Y	-	29	763	29.3369	81.8083	76.398	.	.	.	pseudogene	sense	267	TAGCAGAATCTTGAAAAGCCCAGAGATCCAAAGAGCCCTTTGAGCACCACGCAAGAAGATTCATCGCAGAGTCCTAAAGAAGAACCCACTGAAAAACTTGAGAATCATGTTGAAGCTAAACCCATATGCAAAGACCATGCGCCGGAACACCATTCTTCGCCAGGCCAGGAATCACAAGCTCCGGGTGGATAAGGCAGCTGCTGCAGCAGCAGCACTACCAGCCAAATCAGATGAAAAGGCGGCGGTTGCAGGCAAGAAGCCTGTGGT	.	RBP	RPL4P4	XRCC6	RBP	MAP3K13	SUGP2	-63.9	0.587142	0.669835	0.762959	No	0.399
703	chr3	185136084	185136622	N	-	8	154	8.79136	20.1909	15.4881	.	.	ALL_AGO|slc6022_chr15|50|3|12|0.25|COORDS=chr15-:64582041	pseudogene	sense	538	CTTTTCCTGTGGCAGCAGCCGGGCTGAGAGGAGCGTGGCTGTCTCCTCTCTCCGCCATGGCGTGTGCTCGCCCAATGATATCGGTGTACTCCGAAAAGGGGGAGTCATCTGGCAAAAATGTCACTTAGCCTGCTGTATTCAAGGCTCCTATTCGACCAGATATTGTGAACTTTGTTCACACCAACTTGCGCAAAAACAACAGACAGCCCTACGCTGCCAGTGAATTAGCAGGTCATCAGACCAGTGCTGAGTCTTGGGGTACTGGCAGAGCTATGGCTCGAATTCCCAGAGTTCGAGGTGGTGGGACTCACCGCTCTGGCCAGGGTGCTTTTGGAAACATGTGTCGTGGAGGCCGAAGGTTTGCACCAACCAAAACCTGGCGCCGTTGGCATCGTAGAG…	.	Long RNA	RP11-110C15.4	.	Long RNA	MAP3K13	.	-196.4	0	0	0	No	0
704	chr3	185638906	185638971	Y	-	5	83	5.86738	12.7408	8.31952	.	.	.	exon	sense	65	AGCTCTCGCCGTCGGGATTACTATGACAGAGGATATGATCGGGGCTATGATGATCGGGACTACTA	.	RBP	TRA2B	SND1	.	.	.	-9.3	0.899062	0.955246	0.973185	No	0.991
705	chr3	185643250	185643401	Y	-	10	195	10.6782	24.3431	19.5401	.	.	ALL_AGO|slc13480_chr3|47|4|11|0.36|COORDS=chr3-:187126055;ALL_AGO|slc13479_chr3|45|2|7|0.29|COORDS=chr3-:187125955	exon	sense	151	AGAAGCTCCCGAAGGCATTATACCCGGTCACGGTCTCGCTCCCGCTCCCATAGACGATCACGTAGCAGGTCTTACAGTCGAGATTATCGTAGACGGCACAGCCACAGCCATTCTCCCATGTCTACTCGCAGGCGTCATGTTGGGAATCGGG	.	RBP	TRA2B	ZNF622	.	.	.	-35.4	0.982603	0.989073	0.965974	No	0.957
706	chr3	185655626	185655814	Y	-	25	608	25.2394	66.1616	60.8405	.	.	.	exon	sense	188	TCCGGTAGAGTTAGAGCCCGTGCGGAGGCGGTGCGGAGCATTTCGGCTCTGAGCGGCTGGGCGACCGGCGCGTCGTGCGGGGCTGCGGCGGAGCCTCCTTAAGGAAGGTGCAAGAGGTTGGCAGCTTCGATTGAAGCACATCGACCGGCGACAGCAGCCAGGAGTCATGAGCGACAGCGGCGAGCAGA	.	RBP	TRA2B	LSM11	.	.	.	-71	0.47483	0.519112	0.44759	T20780,T23510,T7918	0.672
707	chr3	186383802	186383981	Y	+	11	256	11.8234	30.5957	25.6358	.	.	.	exon	sense	179	AAGGGATGGTTTAACAAAATGAAGGCACTCATTGCAGCACTGCTTTTGATCACATTGCAGTATTCGTGTGCCGTGAGTCCCACTGACTGCAGTGCTGTTGAGCCGGAGGCTGAGAAAGCTCTAGACCTGATCAATAAAAGGCGACGGGATGGCTACCTTTTCCAATTGCTGCGGATTGC	.	Long RNA	HRG	.	Long RNA	RP11-573D15.8	.	-48.9	0.39076	0.431369	0.426637	T837	0.508
708	chr3	186617964	186618246	N	+	8	171	8.86363	21.8819	17.1091	.	.	.	pseudogene	sense	282	GTCATGAAGCCGCGCAGCAGCCATGGCTTTTAAGGATACCGGAAAAGCACCCGTGGAGCCGGAGGTGGCAATTCACCGAATTCGAATCACCCTAACAAGCCGCAGCGTAAAATCCTTGGAAAAGGTGGGTGCTGACTTGATCAGAGGCGCAAAAGCAAAGAATCTCAAAGTGAAAGGAGGAGTTCGAATGCCTTCCAAGACTTTGAGAATCACTACAAGAAAAACTCCTTGTGGTGAAGGTTCTAAGACGTGGGATCGTTTCCAGATGAGAATTCACAAGCG	.	Long RNA	RP11-42D20.2	.	.	.	.	-85.2	0	0	0	No	0.007
709	chr3	187967220	187967281	Y	+	47	1403	47.2008	146.122	140.373	.	.	.	.	sense	61	tcgaaggaaggaaggaaggaaaggaaggagggagagaaagaaagaaaaaaggaaagaaaAT	.	Repeats	AluJb	.	.	.	.	0	0.0249344	0.00360656	0.00386885	No	1
710	chr3	188151387	188151471	Y	+	9	155	9.59387	20.3098	15.5751	.	.	.	.	sense	84	gagagagagagagagagagagagagagaggagaaaggagagagagaaggagggagagagaggaaagggagaaagaggagaaaat	.	Repeats	GA-rich	.	.	.	.	0	0.00372619	0.00113095	0.00113095	No	1
711	chr3	196263372	196263546	N	+	6	94	6.77071	14.007	9.47571	.	.	.	pseudogene	sense	174	CTTTTACCTCGTTGCACTCCTGAGAGCAAGATGGGTCACCAGCAGCTGTACTGGAGCCACGCGCGAAAATTCGGCCAGGGTTCTCGCTCTTGTCGCGTCTGCTCAAACCGGCACGGTCTGATCCGGAAATATGGCCTCAATATGCGCCGCCAGTGTTTCCGTCAGTACGCGAAG	.	Long RNA	AC092933.3	.	.	.	.	-50.5	0	0	0	No	0.744
712	chr3	197668150	197668279	Y	-	5	93	5.91023	13.7738	9.3092	.	.	.	.	sense	129	gggagaggagggagggggaagggaggggagagagggaggaaggaaggaagggaaagaaagagacagaggggagagagagaggaaggaaggaagaaagggaaggagggaggaaaaGAAAGAAaggaagag	.	Repeats	HAL1-3A_ME	.	.	.	.	0	0.10369	0.102876	0.107798	No	1
713	chr4	6643939	6644150	Y	+	5	80	5.85138	12.4379	8.01899	.	.	ALL_AGO|slc469_chr4|47|18|42|0.43|COORDS=chr4+:6695013;ALL_AGO|slc467_chr4|40|3|7|0.43|COORDS=chr4+:6694905	exon	sense	211	TGGATGGGCCGACCTGGCTGGGACTCGTGAATCTGGAGAAGAGCTGGAGAATGGATAGTATTGTCTGTATTTGGAGACTTTAATTTCTGTGTGAGACCAAAGGAGGAGAGATGTGTTTTGTTCAAAATTTAAATTTGTTGTGGTACACTATCTTATGTAACCTGTCTGGTGAGTTTGTTTGGACAACCTAACTCAGCTTTATTTGACATGG	.	RBP	MRFAP1	TBRG4	.	.	.	-40	0.30481	0.306052	0.320498	No	0.995
714	chr4	16257887	16258155	N	-	14	334	14.7411	38.4549	33.4156	.	.	.	pseudogene	sense	268	CGTGGACCTGTAAGTTCCGCGGAAATGCTCCGCTAGCAACCGCATCATCGGTGCCAAGGACCACGCATCCATCCAGATGAACGTGGCCGAGGCTGACAAGGTCACGGGCAGGTTTAATGGCCAGTTTAAAACTTATGCTATCTGCGGGGCGATAGGATGGGTGAGTCAGATGATTCGATTCTCCGATTGGCCAAGGCCGACAGCATCGTCTCAAAGAAGTTTTGACTAGAGAGAATCACGGATGTGGAATATTTGTCATAAATAAATA	.	Long RNA	AC006427.1	.	Long RNA	TAPT1-AS1	.	-84	0	0	0	No	0.059
715	chr4	21583645	21583713	Y	-	39	684	32.6257	73.841	68.475	.	.	.	.	sense	68	tcccattccattccattccattccattccattccattccattccattccattccattccattctattc	.	Repeats	(GAATG)n	.	.	.	.	0	0.0101912	0.00145588	0.00166176	No	1
716	chr4	26211163	26211297	Y	+	8	78	7.58687	12.2014	7.80388	.	.	.	.	sense	134	ccttcctccttccctgtctccctcccttcctccttccctgtctccctcccttcctccttccctctctccctcccttcctccttccctctctccctcccttcctccttccctctctccctcccttcctccttccg	.	Repeats	(TCCC)n	.	.	.	.	0	0.0411866	0.00128358	0.00146269	No	1
717	chr4	40568972	40569132	Y	-	21	493	21.3564	54.5231	49.3096	.	.	.	.	sense	160	gtgtgaacatggatcactattacttatattctctgagccttagtttcTCAGTCAATGCTAGTCTCCCTAAGTCCCTTCCCCAGCTCACACCATCTTCAGAGCAAGCCCAGGGCACAGGAACAAGGATAGAGAAAAAAAAGAGAGGATAAATGATGaagac	.	Repeats	MIRb	.	.	.	.	-28.5	0.289794	0.0719875	0.0703875	No	0.661
718	chr4	74270002	74270118	Y	+	8	174	8.87494	22.2248	17.4343	.	.	.	exon	sense	116	CCTAGCTTTTCTCTTCTGTCAACCCCACACGCCTTTGGCACAATGAAGTGGGTAACCTTTATTTCCCTTCTTTTTCTCTTTAGCTCGGCTTATTCCAGGGGTGTGTTTCGTCGAGA	.	RBP	ALB	U2AF2	.	.	.	-22.7	0.773569	0.807078	0.774552	T26916	0.188
719	chr4	74272345	74272478	Y	+	9	202	9.86105	25.0759	20.2203	.	.	.	exon	sense	133	GGTGTTGATTGCCTTTGCTCAGTATCTTCAGCAGTGTCCATTTGAAGATCATGTAAAATTAGTGAATGAAGTAACTGAATTTGCAAAAACATGTGTTGCTGATGAGTCAGCTGAAAATTGTGACAAATCACTT	.	RBP	ALB	FUBP3	.	.	.	-25.2	0.592098	0.55712	0.615113	T26916,T26877,T19567,T26410	0.481
720	chr4	74274318	74274522	Y	+	49	1512	49.3052	157.042	151.253	.	.	.	exon	sense	204	TTTTGGAGACAAATTATGCACAGTTGCAACTCTTCGTGAAACCTATGGTGAAATGGCTGACTGCTGTGCAAAACAAGAACCTGAGAGAAATGAATGCTTCTTGCAACACAAAGATGACAACCCAAACCTCCCCCGATTGGTGAGACCAGAGGTTGATGTGATGTGCACTGCTTTTCATGACAATGAAGAGACATTTTTGAAAAA	.	RBP	ALB	PPIG	.	.	.	-42.3	0.283441	0.270735	0.321765	T26916,T26877,T19567,T26410,T4130,T37563,T37645,T25976	0.412
721	chr4	74276029	74276120	Y	+	12	288	12.8194	33.8638	28.8454	.	.	.	exon	sense	91	TCGATGAACTTCGGGATGAAGGGAAGGCTTCGTCTGCCAAACAGAGACTCAAGTGTGCCAGTCTCCAAAAATTTGGAGAAAGAGCTTTCAA	.	RBP	ALB	PPIG	.	.	.	-24.5	0.225516	0.299648	0.331923	T25730,T23054,T25977	0.048
722	chr4	74277723	74277843	Y	+	12	239	12.5742	28.9211	23.9883	.	.	.	exon	sense	120	GCCTGAGCCAGAGATTTCCCAAAGCTGAGTTTGCAGAAGTTTCCAAGTTAGTGACAGATCTTACCAAAGTCCACACGGAATGCTGCCATGGAGATCTGCTTGAATGTGCTGATGACAGGG	.	RBP	ALB	DHX30	.	.	.	-25.9	0.591567	0.535242	0.581633	T25730,T23054,T15706,T25977	0.814
723	chr4	74279135	74279348	Y	+	51	1450	50.712	150.867	145.095	.	.	.	exon	sense	213	GGCGGACCTTGCCAAGTATATCTGTGAAAATCAAGATTCGATCTCCAGTAAACTGAAGGAATGCTGTGAAAAACCTCTGTTGGAAAAATCCCACTGCATTGCCGAAGTGGAAAATGATGAGATGCCTGCTGACTTGCCTTCATTAGCTGCTGATTTTGTTGAAAGTAAGGATGTTTGCAAAAACTATGCTGAGGCAAAGGATGTCTTCCTGGG	.	RBP	ALB	GEMIN5	.	.	.	-43.6	0.353507	0.369808	0.427803	T25730,T23054,T15706,T24062,T26305,T26531,T16881,T4133,T25977	0.963
724	chr4	74280760	74280886	Y	+	26	704	26.5504	75.8685	70.4411	.	.	.	exon	sense	126	TGAATATGCAAGAAGGCATCCTGATTACTCTGTCGTGCTGCTGCTGAGACTTGCCAAGACATATGAAACCACTCTAGAGAAGTGCTGTGCCGCTGCAGATCCTCATGAATGCTATGCCAAAGTGGT	.	RBP	ALB	RPS5	.	.	.	-21.7	0.193095	0.504524	0.523865	T23054,T15706,T24062,T26305,T26531,T16881,T4133,T25817,T25977	0.999
725	chr4	74281973	74282065	Y	+	10	221	10.8168	27.0919	22.1957	.	.	.	exon	sense	92	TCGATGAATTTAAACCTCTTGTGGAAGAGCCTCAGAATTTAATCAAACAAAATTGTGAGCTTTTTGAGCAGCTTGGAGAGTACAAATTCCAG	.	RBP	ALB	DDX59	.	.	.	-20.9	0.142272	0.200043	0.243609	T23054,T15706,T26305,T26531,T16881,T4133,T25977	0.033
726	chr4	74283254	74283382	Y	+	7	145	7.88189	19.206	14.5098	.	.	.	exon	sense	128	GTTCGTTACACCAAGAAAGTACCCCAAGTGTCAACTCCAACTCTTGTAGAGGTCTCAAGAAACCTAGGAAAAGTGGGCAGCAAATGTTGTAAACATCCTGAAGCAAAAAGAATGCCCTGTGCAGAAGA	.	RBP	ALB	FASTKD2,IGF2BP1	.	.	.	-21.4	0.340297	0.397602	0.487859	T4133,T26306,T37565,T25977,T15707	0.579
727	chr4	74283808	74284026	Y	+	49	1385	48.7615	144.253	138.513	.	.	.	exon	sense	218	CCGTGGTCCTGAACCAGTTATGTGTGTTGCATGAGAAAACGCCAGTAAGTGACAGAGTCACCAAATGCTGCACAGAATCCTTGGTGAACAGGCGACCATGCTTTTCAGCTCTGGAAGTCGATGAAACATACGTTCCCAAAGAGTTTAATGCTGAAACATTCACCTTCCATGCAGATATATGCACACTTTCTGAGAAGGAGAGACAAATCAAGAAACAA	.	RBP	ALB	NOL12	.	.	.	-51.7	0.233615	0.483954	0.506927	T26306,T37565,T25977,T15707,T24260,T23055,T4134,T26532,T37647,T16882,T25731	0.106
728	chr4	74285223	74285355	Y	+	10	202	10.7275	25.1583	20.2936	.	.	.	exon	sense	132	TGCACTTGTTGAGCTCGTGAAACACAAGCCCAAGGCAACAAAAGAGCAACTGAAAGCTGTTATGGATGATTTCGCAGCTTTTGTAGAGAAGTGCTGCAAGGCTGACGATAAGGAGACCTGCTTTGCCGAGGA	.	RBP	ALB	PPIG	.	.	.	-34.2	0.230515	0.414886	0.425273	T25977,T15707,T24260,T23055,T4134,T26532,T37647,T16882,T25731	0.191
729	chr4	74719500	74719623	Y	+	11	214	11.6069	26.3368	21.4554	.	.	.	exon	sense	123	TGAAGCTGAAGAAGATGGGGACCTGCAGTGCCTGTGTGTGAAGACCACCTCCCAGGTCCGTCCCAGGCACATCACCAGCCTGGAGGTGATCAAGGCCGGACCCCACTGCCCCACTGCCCAACT	.	Long RNA	PF4V1	.	.	.	.	-37.1	0.382276	0.128821	0.13687	T684	0.368
730	chr4	74846558	74847258	Y	-	61	1958	61.1797	201.608	195.804	.	.	.	exon	sense	700	GAAGCTGAAGAAGATGGGGACCTGCAGTGCCTGTGTGTGAAGACCACCTCCCAGGTCCGTCCCAGGCACATCACCAGCCTGGAGGTGATCAAGGCCGGACCCCACTGCCCCACTGCCCAACTGATGTGAGTCCTTGCACTGCATCTGTCAGTGCTCCCGCTCCGTGCCTCCTCTGCCCAACCCTCCCCCTTCTAATGCCATTTGCAAACCCAAGGACTGAAAGTCACATCTCTTCTCTTTTCCCTGCCAGAGCCACGCTGAAGAATGGAAGGAAAATTTGCTTGGACCTGCAAGCCCCGCTGTACAAGAAAATAATTAAGAAACTTTTGGAGAGTTAGCTACTAGCTGCCTACGTGTGTGCATTTGCTATATAGCATACTTCTTTTTTCCAGTTTCAAT…	.	Long RNA	PF4	.	.	.	.	-157.6	0.290826	0.0446757	0.0637314	T4157	0.657
731	chr4	74847411	74847744	Y	-	23	580	23.4695	63.3023	58.0033	.	.	.	exon_intron_junction	sense	333	ATTGGCCACAGAGACCCAGCCCGAGTTTCCCATCGCACTGAGCACTGAGATCCTGCTGGAAGCTCTGCCGCAGCATGAGCTCCGCAGCCGGGTTCTGCGCCTCACGCCCCGGGCTGCTGTTCCTGGGGTTGCTGCTCCTGCCACTTGTGGTCGCCTTCGCCAGCGGTGAGAGCAGAAGCCAGGCTGTGAGGGCTGGCAGCGGCGAGGGGGAGTCCGGGAAGCCCTGGGGCTGGGGAGGAATCCTCTAGGATCATGATCACAGCCACACTTAACGGAGAGCCTGCTGAGTGTCTGGCCACAGTGCCAGGCGCTGCACCTGCACCTCCCACCTGG	.	Long RNA	PF4	.	.	.	.	-146	0.0412673	0.0271532	0.0395556	T4157	0.245
732	chr4	74852155	74853362	Y	-	50	1559	50.3253	161.702	155.982	.	.	.	exon	sense	1207	TCTAGACAGTGACTTGTATGCTGAACTCCGCTGCATGTGTATAAAGACAACCTCTGGAATTCATCCCAAAAACATCCAAAGTTTGGAAGTGATCGGGAAAGGAACCCATTGCAACCAAGTCGAAGTGATGTAAGTTGCTGTTTCTGTGCTATTGCCTTATCAGAGAAACCCTCTACCTCCATCCACATATGCACTCGTTTCCTCCAGTCTCATGGATTAGTTCTGATATTCAGATCAGGACACCCACAGATAACCCTGTTCTCTTTTGCAGAGCCACACTGAAGGATGGGAGGAAAATCTGCCTGGACCCAGATGCTCCCAGAATCAAGAAAATTGTACAGAAAAAATTGGCAGGTGATGAATCTGCTGATTAATTTGTTCTGTTTCTGCCAAACTTCT…	.	Long RNA	PPBP	.	.	.	.	-250	0.17897	0.0399296	0.0506396	T4156	0.161
733	chr4	74853681	74853911	Y	-	74	2430	73.9816	248.992	243.066	.	.	.	exon	sense	230	AGCCACTTATCTGCAGACTTGTAGGCAGCAACTCACCCTCACTCAGAGGTCTTCTGGTTCTGGAAACAACTCTAGCTCAGCCTTCTCCACCATGAGCCTCAGACTTGATACCACCCCTTCCTGTAACAGTGCGAGACCACTTCATGCCTTGCAGGTGCTGCTGCTTCTGTCATTGCTGCTGACTGCTCTGGCTTCCTCCACCAAAGGACAAACTAAGAGAAACTTGGCGA	.	Long RNA	PPBP	.	.	.	.	-54.4	0.0497174	0.0721739	0.0784609	T4156	0.356
734	chr4	77996763	77996856	Y	-	7	145	7.88124	19.1868	14.5188	.	.	.	exon	sense	93	GACCGACCCAGCGGCCGCAGCCGTGCGTCCCGCTCGAGCGCCAgcgcccgcgcccgcgccccccgATCCGCTTCCCCTTTCTCCCTCCTCAGT	.	RBP	CCNI	DHX30	.	.	.	-22.5	0.00766667	0.235957	0.248032	No	0.914
735	chr4	79740202	79740301	Y	+	33	958	33.5276	101.412	95.8468	.	.	.	.	sense	99	tgcctggtaagtgagtaggcatacaatattatttattgaatgaatgaatCAATGAAAGATGGAAAAAAATGTTCCGCTAAATTTCTTCTTGGAATCTAG	.	Repeats	L2a	.	.	.	.	-16.4	0.393707	0.394677	0.428313	No	0.178
736	chr4	83294907	83295104	Y	-	8	176	8.88093	22.4189	17.6474	.	.	.	exon	sense	197	GAGGAGGAGGCGAGAGCGGCCGCCGCTGGTGCTTATTCTTTTTTAGTGCAGCGGGAGAGAGCGGGAGTGTGCGCCGCGCGAGAGTGGGAGGCGAAGGGGGCAGGCCAGGGAGAGGCGCAGGAGCCTTTGCAGCCACGCGCGCGCCTTCCCTGTCTTGTGTGCTTCGCGAGGTAGAGCGGGCGCGCGGCAGCGGCGGG	.	RBP	HNRNPD	LSM11	.	.	.	-86.5	0.922949	0.938523	0.933472	No	0.295
737	chr4	86528530	86528594	Y	+	31	643	29.5022	69.7696	64.3848	.	.	.	intron	sense	64	cggagggaggaagggagagagagaaagagagaaagagagaaaaagagagaaagagaaagaaaAC	.	RBP	ARHGAP24	SF3B1	.	.	.	0	0.0159375	0.00323437	0.00357813	No	1
738	chr4	86721654	86721754	Y	+	10	189	10.6397	23.7873	18.9679	.	.	.	.	sense	100	aggaggaggaaaaggaggaagaagaggagagagggggaagggaaggaagaggaagaagaaaagggagagaaggaaaggaggaagagaaagaagaaaaaag	.	Repeats	GA-rich	.	.	.	.	0	0.06081	0.00114	0.00128	No	1
739	chr4	90758183	90758326	Y	-	9	196	9.84118	24.4875	19.6824	.	.	.	.	sense	143	aggaggaggaggaCGGCGACGACCAGAAGGGGCCCAAGAGAGGGGGCGAGCGACCGAGCGCCGCGACGCGGAAGTGAGGTGCGTGCGGGCTGCAGCGCAGACCCCGGCCCGGCCCCTCCGAGAGCGTCCTGGGCGCTCCCTCA	.	Repeats	(TCC)n	.	.	.	.	-63.5	0.194392	0.0533706	0.0577832	No	0.487
740	chr4	91759630	91760267	Y	-	183	6571	180.909	663.542	657.19	.	.	.	pseudogene	sense	637	CGACAACTCGGTGGTGGCCACTGCGCAGACCAGACTTCGCTCGTACTCGCGCGCCTCGCTCCGCTTTTCCTCCGCAACCATGTCTGACAAACCCGATATGGCTGAGATCGAGAAATTCGATAAGCCGAAACTGAAGAAGACAGAGACGCAAGAGAAAAATCCACTGCCTTCCAAAGAAACGATTGAACAGGAGAAGCAAGCAGGCGAATCGTAATGAGGCGTGCGCCGCCAATATGCACTGTACATTCCACAAGCATTGCCTTCTTATTTTACTTCTTTTAGCTGTTTAACTTTGTAAGATGCAAAGAGGTTGGATCAAGTTTAAATGACTGTGCTGCCCCTTTCACATCAAAGAACTACTGACAACGAAGGCCGCGCCTGCCTTTCCCATCTGTCTGT…	.	Long RNA	TMSB4XP8	.	Long RNA	CCSER1	.	-159.4	0.666155	0.709196	0.740446	T15750	0.711
741	chr4	91759635	91760250	Y	+	12	265	12.7266	31.4867	26.5121	.	.	.	.	sense	615	ttttttttaagtttttaaactttttatttgcatattaaaaaaattGTGCATTCCAATAATTAAAATCATTTGAACAAAAAAAAAATGGCACTCTGATTAAACTGCATTACAGCCTGCAGGACACCTTGGGCCAGCTTGGTTTTACTCTAGATTTCACTGTTGTCCCACCCCACTTCTTCCACCCCACTTCTTCCTTCACCAACATGCAAGTTCTTTCCTTCCCTGCCAGCCAGACAGACAGATGGGAAAGGCAGGCGCGGCCTTCGTTGTCAGTAGTTCTTTGATGTGAAAGGGGCAGCACAGTCATTTAAACTTGATCCAACCTCTTTGCATCTTACAAAGTTAAACAGCTAAAAGAAGTAAAATAAGAAGGCAATGCTTGTGGAATGTACAGTGCAT…	.	Repeats	AT_rich	.	.	.	.	-161.7	0.679393	0.734481	0.7668	No	0.256
742	chr4	105440044	105440386	Y	-	7	131	7.82317	17.781	13.1451	.	.	.	.	sense	342	gagagcaattattgaagctgatcctcttacaaccacacaagaagttgccaaagagcttgacgtcgaccattccagggtcgcttggcatttgaagcaaattggaaaggtgaaaaagctcaataagtgggtgcttcatgagctgagtgaaaatttaaaaaaatcatcattttgaagtgttgtcttcccttattctatgcaacaacgatggaccatgtcttgataggattgtgacgtgtgacgaaaagtgggttttatatgacaaccagtgatgaccagctctgtggctggaccgggaagaagctccaaagcacttcccaaatccaaacttgcaccaaaaagaag	.	Repeats	HSMAR1	.	.	.	.	-82.4	0.202249	0.201822	0.245094	No	0.236
743	chr4	109101921	109102068	Y	+	22	487	22.0659	54.0168	48.7481	.	.	.	.	sense	147	tgaagaggaagaggaaaagaagagggaagagaaggaagaaggagaaaaagagaaagaagaaagaggaagagaagaggaagagaaggagtaagaggagaagaggaagaaggagaagaaaacgaggagcagggaagagaaggaagaagg	.	Repeats	GA-rich	.	.	.	.	0	0.043551	0.0434762	0.0502925	No	1
744	chr4	109546293	109546411	Y	+	10	230	10.8471	27.9684	23.0443	.	.	.	exon	sense	118	GCTTTCCTTATCGAGGAGCAGAAAATCGTTGTGAAAGTGTTGAAGGCACAAGCACAGAGTCAGAAAGCTAAATAAAAAAATGAAACTTTTTTGAGTAATAAAAATGAAAAGACGCTGT	.	RBP	RPL34	DDX3X	.	.	.	-15	0.751729	0.675398	0.785347	T25668,T26048,T14499	0.472
745	chr4	140222882	140222997	Y	+	344	9262	275.122	932.832	926.238	.	.	.	exon	sense	115	TGACTGACCGAGCCGGGTGGTGGCGGGAGCAGCGGGAGCAGCCGGAACGATGCCGGCCGTGAGCCTCCCGCCCAAGGAGAATGCGCTCTTCAAGCGGATCTTGGTAAGTGTGAGG	.	RBP	NAA15	FXR2	Long RNA	NDUFC1	.	-44.8	0.950922	0.958591	0.970965	No	0.372
746	chr4	140331613	140331755	Y	+	9	202	9.86105	25.0759	20.2203	.	.	.	.	sense	142	gaggggaggggaggggagggAAGGGAgaaggaaggaaggagagagaaaagaatggaaggaaggaaggaaaaagaaaagaatgaaaggaaggaaggaaggaaagagaaagaaaaagaaagaaagagaaaaagaaagaaaagaa	.	Repeats	GA-rich	.	.	.	.	0	0.00621831	0.00539437	0.0061338	No	1
747	chr4	140618781	140619170	Y	-	8	172	8.8664	21.963	17.2118	.	.	.	.	sense	389	GCGAGTGGAAAAATAGGGGACAGAAATCAGGTATTGGCAGTTTTTCCATTTTCATTTGTGTGTGAATTTTTAATATAAATGCGGAGACGTAAAGCATTAATGCAAGTTAAAATGTTTCAGTGAACAAGTTTCAGCGGTTCAACtttataataattataaataaaCCTGTTAAATTTTTCTGGACAATGCCAGCATTTGGATTTTTTTAAAACAAGTAAATTTCTTATTGATGGCAACTAAATGGTGCTTGTAGCATTTTTATCATACAGTAGATTCCATCCATTCACTATACTTTTCTAACTGAGTTGTCCTACATGCAAGTACATGTTTTTAATGTTGTCTGTCTTCTGTGCTGTTCCTGTAAGTTTGCTATTAAAATACATTAAACT	.	Repeats	AT_rich	.	.	.	.	-70.3	0.87347	0.87855	0.695751	No	0.849
748	chr4	140619564	140619787	Y	-	10	184	10.6007	23.28	18.4932	.	.	.	pseudogene	sense	223	TCTCCAACGCCAGCGCCGCCTCTCGCTCGCCGAGCTCCAGCCGAAGGAGAAGGGGGGTAAGTAAGGAGGTCTCTGTACCATGGCTCGTACAAAGCAGACTGCCCGCAAATCGACCGGTGGTAAAGCACCCAGGAAGCAACTGGCTACAAAAGCCGCTCGCAAGAGTGCGCCCTCTACTGGAGGGGTGAAGAAACCTCATCGTTACAGGCCTGGTACTGTGGCG	.	Long RNA	RP11-308D13.2	.	RBP	MGST2	SUGP2	-74	0.884529	0.87009	0.963771	No	0.412
749	chr4	144271065	144271228	Y	-	8	152	8.77914	19.9637	15.2637	.	.	.	pseudogene	sense	163	GGTGGCCCTGGGATGGGGAACCGCGGTGGCTTCCGCGGAGGTTTCGGCAGTGGCATCCGGGGCCGGGGTCGCGGAGGCAAGGCCGAGGATAAGGAGTGGATGCCCGTCACCAAGTTGGGCCGCTTGGTCAAGGACATGAAGATCAAGTCCCTGGAGGAGATCT	.	RBP	RP11-364L4.1	DDX3X	Long RNA	GAB1	.	-70.4	0.358748	0.351699	0.997865	No	0.02
750	chr4	144464774	144465088	Y	+	5	80	5.85138	12.4379	8.01899	.	.	.	exon	sense	314	GATATCGATGGTATTTTGGAAAGAGGTGCAAAGAAGGTGAGATGTAGATTAAATAATGCTTTTAATATAGAATGTTTTAGACCAGAAACAGGAAATATTTGTTACATTGATGATAAATAATTTTATTTCCTTAAAGAGAAGCTTTTGTGTACGTGAAGTTAATTTATTTTGACTGCAGTTTTCATGCTTTCTTTGCTGTGAATCTAAGAAGCTGATTGTTTTGTTCTCTAGACTGCAGAGATGAATGAAAAGCTCTCCAAGATGGGCGAAAGTTCACTTAGAAACTTTACAATGGATACAGAGTCAAGTGTTTA	.	RBP	SMARCA5	BUD13	.	.	.	-61.3	0.495554	0.403752	0.416143	No	0.554
751	chr4	152020779	152020859	Y	+	8	174	8.87494	22.2248	17.4343	.	.	.	exon	sense	80	CCCTTTTGGCTCTCTGACCAGCACCATGGCGGTTGGCAAGAACAAGCGCCTTACGAAAGGCGGCAAAAAGGGAGCCAAGA	.	RBP	RPS3A	GEMIN5	.	.	.	-29.4	0.73035	0.85945	0.898038	T3218,T26143,T26367,T26872	0.003
752	chr4	152022129	152022300	Y	+	9	177	9.7523	22.5216	17.7198	.	.	.	exon	sense	171	TTGCATCTGATGGTCTCAAGGGTCGTGTGTTTGAAGTGAGTCTTGCTGATTTGCAGAATGATGAAGTTGCATTTAGAAAATTCAAGCTGATTACTGAAGATGTTCAGGGTAAAAACTGCCTGACTAACTTCCATGGCATGGATCTTACCCGTGACAAAATGTGTTCCATGG	.	RBP	RPS3A	BUD13	.	.	.	-36.8	0.985175	0.991228	0.983251	T3218,T26143,T26367,T26872,T26020,T26675,T26993,T26497,T26277	0.771
753	chr4	152024113	152024210	Y	+	10	189	10.6397	23.7873	18.9679	.	.	.	exon	sense	97	AGATACGGAAGACCTCTTATGCTCAGCACCAACAGGTCCGCCAAATCCGGAAGAAGATGATGGAAATCATGACCCGAGAGGTGCAGACAAATGACTT	.	RBP	RPS3A	GRWD1	Long RNA	SH3D19	.	-17.6	0.996165	0.998155	0.991392	T26367,T26872,T26020,T26993,T26497	0.53
754	chr4	155507533	155507709	Y	-	5	83	5.86738	12.7408	8.31952	.	.	.	exon	sense	176	GTGCTGGAAGCTGGAACTCTGGGAGCTCTGGACCTGGAAGTACTGGAAACCGAAACCCTGGGAGCTCTGGGACTGGAGGGACTGCAACCTGGAAACCTGGGAGCTCTGGACCTGGAAGTACTGGAAGCTGGAACTCTGGGAGCTCTGGAACTGGAAGTACTGGAAACCAAAACCCT	.	RBP	FGA	LARP7	.	.	.	-54.7	0.0670511	0.0516989	0.117915	No	0.426
755	chr4	156379949	156380020	N	-	20	537	20.7222	59.0397	53.78	.	.	.	Intergenic	unannotated	71	ATCACTGTAAAACTATCTAGCATTAAACTTTTAAGTTAAAGACTGAGCGGATCTACACCTCTCTGCAGTGA	.	Unannotated	.	.	Unannotated	.	.	-13.4	0	0	0	No	0.05
756	chr4	157881446	157881519	Y	-	8	176	8.88093	22.4189	17.6474	.	.	.	intron	sense	73	TAGAGCTCCAGAAATAATGTACTTTTGTTTAGAAATAAAAGTAAAGTCAGTAACAAAATGCATAGTTGTAGAG	.	Long RNA	PDGFC	.	.	.	.	-8.2	0.0706027	0.00039726	0.000383562	No	0.338
757	chr4	165864417	165864737	N	+	11	194	11.4199	24.2305	19.4042	.	.	.	pseudogene	sense	320	TTGGTTCCTCGTTCCCTGCACAAAATGCCCTGTGAAGCCACAGAAACCGTCCCTGCTACAGAGCAGGAGTTGCCGCAGCCGCAGGCTGAGACAGGGTCTGGAACAGAATCTGACAGTGATGAATCAGTACCAGAGCCTGAAGAACAGGATTCCACCCAGACGTCCACACAAGAAGCCCAGCTGGTGGCAGCAGCTGAAATTGATGAAGAGCCAGTCAGTAAAGCAAAACAGATTTGGAGTGAAAAGAAGGCACAGAAGGCTATGTCCAAACTGGGTCTTCGACAGGTTACAGGAGTCACTAGAGTCGCTATCCGGAAATC	.	Long RNA	RP11-366M4.7	.	.	.	.	-90.3	0	0	0	No	0.25
758	chr4	185743959	185744092	Y	-	21	520	21.5137	57.2686	52.0307	.	.	.	intron	sense	133	AGTTTTACCAGGGTTTGTGGCAGCGACTCTAAGATTGTCATTTTACATCAAATGCTGAATGTCAATGCATAAGAAATTTCAGTTTGTGGCAAGCCTTGGGTTGTATATAATGGCAAGAAGAGAAAACTATCAC	.	Long RNA	ACSL1	.	.	.	.	-30.4	0.22606	0.00928571	0.0119398	No	0.093
759	chr5	3276258	3276417	Y	-	7	41	5.65617	7.82589	4.16794	.	.	.	Intergenic	sense	159	tccctccttcctcccctccctccttcatcctctccctccttcctcccctccctccttcatcctctccctccttcctcccctccctccttcatcctctccctccttcatccccccctccttcctcccctccctccttcatcctctccctccttcatcctc	.	Repeats	G-rich	.	.	.	.	0	0.265956	0.00624528	0.00738365	No	1
760	chr5	9353144	9353242	Y	-	6	101	6.81245	14.6342	10.1071	.	.	.	.	sense	98	tttcctttcctttcctttcctttcctttccttccttcctttcctttcctttcctttcctttcctttccttcctttcctttccttccttcttcttttgt	.	Repeats	A-rich	.	.	.	.	0	0.0812043	0.0314731	0.0322258	No	1
761	chr5	17249702	17249764	Y	+	45	1371	45.3608	142.895	137.16	.	.	.	intron	sense	62	TTGAGTTTGAGATCTCAGAAAATAAAATAGTGCCACCAAAATACAAAAAAGACCTCTAGATT	.	Long RNA	BASP1	.	.	.	.	-3.6	0.125435	0.00827419	0.00975806	No	0.66
762	chr5	17353849	17354237	Y	-	6	121	6.90739	16.8161	12.1984	.	.	.	pseudogene	sense	388	TGCGATGGAGTGTGCATTACATTTGGAAAAAAATGTGAATCAGTCACTACTGGAACTGCACAAACTGGCCACTGACAAAAATGACCCCCATTTGTGTGACTTCATTGAGACACATTACCTGAATGAGCAGGTCAAAGCCATCAAAGAATTGGGTGACCACATGACCAACTTGTGCAAGATGGGAGCACCCGAATCTAGCTTGGCGGAATATCTCTTTGACCAGCACACCCTGGGAGACAGTGATAATGAAAGCTAAGCCTCAGGCTAATTTCCCCATAGCCGTGGGGTGACTTCCCTGGTCACCAAGGCAGTGCATGCATGTTGGGGTTTCCTTTACCTTTTCTATAAGTTGTACCAAAACATCCACTTAAGTTCTTTGATTTGTACC	.	Long RNA	FTHL10	.	Long RNA	CTD-2139B15.2	.	-107.3	0.690786	0.765755	0.874729	No	0.051
763	chr5	33162261	33162928	Y	+	15	359	15.7096	41.0602	35.9348	.	.	ALL_AGO|slc875_chr5|45|4|9|0.44|COORDS=chr5+:33198031;ALL_AGO|slc3636_chr1|50|3|6|0.50|COORDS=chr1+:45015913	pseudogene	sense	667	CTCTTTCCAGCCAGCGCCGAGCGATGGGCATCTCTCGGGACAACTGGCACCAGCGCCGCAAAACCGGGGGCAAGAGAAAGCCCTACCACAAGAAGCGGAAGTATGAGTTGGAGCGCCCAGCTGCCAACACCAAGATTGGCCCCCGCCGCATCCACACAGTCCGTGTGCAGGGAAGTAACAAGAAATACCGTGCCCTGAGGTTGGACGTGGGGGAATTTCTCCTGGGGCTCAGAGTGTTGTACTCGTAAAACAAGGATCATCGATGTTGTCTACAATGCATCTAATAATGAGCTGGTTCGTACCAAGACCCTGGTGAAGAATTGCATCGTGCTCATCGACAGCACACCGTGCCGACAGTGGTAAGATGTCCCACTACGTGCTGCCCCTGGGCCGCAAGAA…	.	Long RNA	RP11-36C20.1	.	Long RNA	CTD-2066L21.3	.	-202.5	0.278001	0.74503	0.970775	No	0.354
764	chr5	40832559	40832673	Y	-	9	204	9.8677	25.2916	20.4614	.	.	ALL_AGO|slc9025_chr5|38|2|8|0.25|COORDS=chr5-:40868346	exon	sense	114	ATGGATTCCGTGAAGGAACAACACCTAAACCCAAGAGGGCAGCTGTTGCAGCATCCAGTTCATCTTAAGAATGTCAACGATTAGTCATGCAATAAATGTTCTGGTTTTAAAAAA	.	RBP	RPL37	IGF2BP1	.	.	.	-19.4	0.759728	0.748868	0.769974	T3226,T25877	0.331
765	chr5	40834306	40834691	Y	-	20	464	20.3856	51.6597	46.4772	.	.	.	exon	sense	385	GTTTGGAAAGCGTCGCAATAAGACGCACACGTTGTGCCGCCGCTGTGGCTCTAAGGCCTACCACCTTCAGAAGTCGACCTGTGGCAAATGTGGCTACCCTGCCAAGCGCAAGAGAAAGTGTAAGTAACATTTTTCAGGCCAACTGTGTTAGCTTTTGTTTGTATTGCACTTAAGTGGGGGCATAGGTTTGAACTTTATTTGGTGCCTATCTTAAAACTCGTACATCTGTATGCCGATGAGGTGGCATAAAACTCGTGTGTTAACAACACCTACAAGGTGTGTGGGAGAACACCGTTTGAAATCTTTTCTGAACTTATGTTTTAGATAACTGGAGTGCCAAGGCTAAAAGACGAAATACCACCGGAACTGGTCGAATGAGGCACCT	.	RBP	RPL37	EFTUD2	.	.	.	-104.3	0.538842	0.475797	0.478753	T3226,T25877,T26245,T26163	0.554
766	chr5	43495556	43495679	Y	-	12	261	12.7045	31.0382	26.1122	.	.	.	intron	sense	123	GCACCATGAAGCTTTGAGTGAAGCTCTTCCTGGGGACAATGTGGGCTTCAATGTCAAGAATGTGTCTGTCAAGGATGTTCGTCGTGGCAACGTTGCTGGTGACAGCAAAAATGACCCACCAAT	.	RBP	C5orf34	SUB1	Long RNA	RP11-159F24.3	.	-31.2	0.109317	0.108561	0.994187	No	0.477
767	chr5	55240484	55240677	Y	+	6	103	6.82661	14.8784	10.3278	.	.	.	pseudogene	sense	193	TGAGAGCCAAGTGGAGGAAGAAGCGAATGCGCAGGCTGAAGCGCAAAAGAAGAAAGATGAGGCAGAGGTCCAAGTAAACCGCTAGCTTGTTGCACCGTGGAGGCCACAGGAGCAGAAACATGGAATGCCAGACGCTGGGGATGCTGGTACAAGTTGTGGGACTGCATGCTACTGTCTAGAGCTTGTCTCAATG	.	Long RNA	CTD-2031P19.4	.	Long RNA	IL6ST	.	-51.3	0.479585	0.403026	0.481352	T33956	0.342
768	chr5	55800517	55800942	Y	-	17	380	17.4734	43.1949	38.0946	.	.	.	pseudogene	sense	425	GCTCTTCCCTTTTGCGGCTATCACCGAAGCAGGAGTGGCCAAAATGAAGTTTAATCCCTTTGTGACTTCCGACCGAAGCAAGAATCGCAAAAGGCATTTCAATGCACCTTCCCACATTCGAAGGAAGACTATGTCTTCCCCTCTTTCCAAAGAGCTGAGACAGAAGTACAACGTGTGATCCATGCCCATCCGAAAGGATGATGAAGTTCAGGTTGTACGTGGACACTATAAAGGTCAGCAAATTGGCAAAGTAGTCCAGGTTTACAGGAAGAAATATGTTATCTACATTGAACGGGTGCAGCGGGAAAAGGCTAATGGCACAACTGTCCACGTAGGCATTCACCCCAGCAAGGTGGTTATCACTAGGCTAAAACTGGACAAAGACTGTGAAAAGATCCT…	.	Long RNA	RPL26P19	.	.	.	.	-109.1	0.741694	0.706687	0.909351	No	0.278
769	chr5	61602046	61602286	Y	+	15	365	15.7336	41.6679	36.5346	.	.	.	exon	sense	240	CGTCTCACGGCCCCGGCCCTAGCTTCACCCCGACTACCCGGCGTGCGCGTCCTCCTGCCGGCCTGCAGGCCCGGGGCCTCCGCCTGCTTCCCCACAGCTGCTCCTTGCGGCCCCGCTTGCGTTCACGCTGTcgcccgggccggcgcggccgcgggcAAccgctccccctcccacacctaccccgccccctccccgccttttccgccctccggtccccctccctcGGCCCGCTGCTGCTGC	.	RBP	KIF2A	IGF2BP2	.	.	.	-78.2	0.586567	0.637463	0.529787	No	0.678
770	chr5	75469721	75469929	Y	-	5	88	5.8937	13.3271	8.88712	.	.	.	pseudogene	sense	208	TTTTTGTAGAAAAATACGATCCTACGATAGAAGATTCTTATAGAGAGCAAGTTGAAGTAGATGCACAACAGTGTATGCTTGAAATCTTGGATACTGCAGGAACGGAGCAATTTACAGCAATGAGGGATTTATACATGAAAAATGGACAAGGGTTTGCATTAGTTTATTCCATCACAGCACAGTCCACATTTAACGATTTACAAGACCT	.	Long RNA	RAP1BL	.	Long RNA	SV2C	.	-36.1	0.721101	0.965187	0.996288	No	0.737
771	chr5	76878202	76878369	Y	+	5	88	5.89401	13.3349	8.88112	.	.	.	pseudogene	sense	167	GGAGGGTGTAGAAGAGAAGAAGAAGGAGGTTCCTGCTGTGCCAGAAACCCTTAAGAAAAAGCGAAGGAATTTCGTAGAGCTGAAGATCAAGCGCCTGAGAAAGAAGTTTGCCCAAAAGATGCTTCGAAAGGCAAGGAGGAAGCTTATCTATGAAAAAGCAAAGCACT	.	Long RNA	RPL7P23p	.	Long RNA	WDR41	.	-36.6	0.791006	0.914114	0.959491	No	0.022
772	chr5	77080626	77080970	N	+	19	473	19.6178	52.6019	47.3512	.	.	.	pseudogene	sense	344	accGCCGAGACTGCATCCGCCTTGCGAGCACAGAGCCTCGCCTTCGCTGCTCCACTGCCAGTCCACACCTGCCACCAGCTCACCATGGATGATGATATCACCGCGCTCGTCATTGACAACGGCTCCGGCATGTGCAAGGCCAGCTTCACGGGCGACAATGCCGCCCGGGCAGTCTTCCCCTCCATCGTTGGGCACCCCAGGCACCAGGGCGTGATGGTGGGCATGGGTCAGAAGGATTCCTATGTGGGCGACGAGGCCCAGAGCAAGAGAGGCATCCTCACCCTGAAGTACCCCATTGAGCACGGCATTGTCACCAACTGGGACGACATGGAGAAGATCTGGCA	.	Long RNA	CTD-2309M13.1	.	Long RNA	TBCA	.	-116	0	0	0	No	0.855
773	chr5	77081460	77081614	N	+	19	457	19.5412	50.9829	45.7458	.	.	.	pseudogene	sense	154	CGAGTGGTTCTGCTGCCCCGAGGCGCTCTTCCAGCCTTCCTTCCTGGGCATGGAGTCCTGTGGCATCCACGAAACTACCTTCAACTCCATCATGAAGTGTGACTTGGACATCCGCAAAGACCTGTACACCAGCACAGTGCTGTCTGGTGGCACC	.	RBP	ACTBP2	YBX3,SND1	Long RNA	TBCA	.	-48.1	0	0	0	No	0.175
774	chr5	81571884	81572281	Y	-	21	520	21.5137	57.2686	52.0307	.	.	ALL_AGO|slc10341_chr5|46|4|12|0.33|COORDS=chr5-:81607656	exon	sense	397	TGATCAAGAATGGCAAGAAAATCACAGCCTTTGTACCCAATGACGGTTGCTTGAACTTTATTGAGGTGAGTATTTCAACTCTATCGTACCTTCTGTTCTTGGGGTGGCCTCCCTCACATTTTTATCTGATGCAAGGGAGTTTCCTCACATGAAAGTATTTTTGTGATCGCCACCAACACCAGAAATAAACTTCTTATTTTATTCCAGGAAAATGATGAAGTTCTGGTTGCTGGATTTGGTCGCAAAGGTCATGCTGTTGGTGATATTCCTGGAGTCCGCTTTAAGGTTGTCAAAGTAGCCAATGTTTCTCTTTTGGCCCTATACAAAGGCAAGAAGGAAAGACCAAGATCATAAATATTAATGGTGAAAACACTGTAGTAATAAATTTTCATATGCC	.	RBP	RPS23	PRPF8	Long RNA	ATG10	.	-105.1	0.62336	0.60429	0.587592	T25843,T25784,T26415	0.016
775	chr5	81573511	81573665	Y	-	9	182	9.77897	23.0271	18.2434	.	.	.	exon	sense	154	GTCGTGGACTTCGTACTGCTAGGAAGCTCCGTAGTCACCGACGAGACCAGAAGTGGCATGATAAACAGTATAAGAAAGCTCATTTGGGCACAGCCCTAAAGGCCAACCCTTTTGGAGGTGCTTCTCATGCAAAAGGAATCGTGCTGGAAAAAGT	.	RBP	RPS23	GNL3	.	.	.	-40	0.640091	0.868162	0.945506	T25843,T25784,T26415,T26599	0.298
776	chr5	90606765	90606844	Y	-	82	2368	79.9868	242.803	236.892	.	.	.	.	sense	79	tGAaaagaaagaaggagagaaggaagaaaggagggcggaaggaaaggaagaagggagagaagaagagaagaaagaagca	.	Repeats	T-rich	.	.	.	.	0	0.00459494	0.000873418	0.001	No	1
777	chr5	108120895	108120992	N	+	7	124	7.78231	17.0424	12.4085	.	.	.	pseudogene	sense	97	GTGACTATGTCTCCAAATGGATCCCTCTGTGCATCTGGAGGCAAGGATGGCCAGGCCATGCTGTGGGATCTCAACGAAGGCAAACACCTTTATATGC	.	Long RNA	CTC-329H14.1	.	.	.	.	-27.2	0	0	0	No	0.215
778	chr5	110528489	110528629	Y	-	12	288	12.8175	33.8045	28.8311	.	.	.	pseudogene	sense	140	ATGTTCAGTATAAGAAATATTGGAAAGACGCTCGTCACCAGGACCCAAGGAACCAAAATTGCATCTGATGGTCTCAAGGGTCGTGTGTTTGAAGTGAGTCTTGCTGATTTGCAGAATGATGAAGTTGCATTTAGAAAATT	.	Long RNA	AC010468.1	.	.	.	.	-31.5	0.457707	0.760629	0.999857	No	0.184
779	chr5	115387554	115388018	Y	-	30	849	30.5398	90.4012	84.9303	.	.	ALL_AGO|slc11285_chr11|45|3|5|0.60|COORDS=chr11-:118393380	pseudogene	sense	464	AGGCTGCGGTGTCTGCTGCTACTCTCCGAGCTTCGCAATGCCGCCCAAGGACGACGAGAAGAAGGACGCTGGAAAGTCAGCCAAGAAAAACAAAGACCCAGTGAACAAATCCGGGGGCAAGGCCAAAAAGAAGAAGTGGTCCAAAGGCAAAGTTCGGGACAAGCTCAATAACTTAGTCTTGTTTGACAAAGCTACCTATGACAAACTCTGTAAGGAAGTTCCCAACTATAAACTTATAACCCCAGCTGTGGTCTCTGAGAGACTGAAGATTCGAGGCTCCCTGGCCAGGGCAGCCCTTCAGGAGCTCCTTAGTAAAGGACTTATCAAACTGGTTTCAAAGCACAGAGCTCAAGTAATTTACACCAGAAATACCAAGGGTGGAGATGCTCCAGCTGCTGG…	.	Long RNA	CTD-2287O16.1	.	Long RNA	ARL14EPL	.	-120.3	0.86078	0.724918	0.843888	T22386	0.078
780	chr5	115898220	115898297	Y	+	14	277	14.3908	32.7338	27.7455	.	.	.	pseudogene	sense	77	CTCTTTCCGGTGTGGAGTCTGGAGACAACGTGCAGAAATGGCACCTCGAAAGGGGAAGGAAAAGGAAGAACAGGTCA	.	Long RNA	CTB-118N6.1	.	Long RNA	SEMA6A	.	-19.3	0.619818	0.336169	0.653584	No	0.049
781	chr5	118309463	118309857	Y	+	11	214	11.6069	26.3368	21.4554	.	.	.	pseudogene	sense	394	TGCATCGGATCACCGGCGTGCCCCACCATGTCAGACGCAGCCGTAGACACCAGCTCCGAAATCACCACCAAGGACTTACAGGAGAAGAAGGAAGTTGTGGAAGAGGCAGAAAATGGAAGAGACGCCCCTGCTAACGGGAATGCTAATGAGGAAAATGGGGAGCAGGAGGCTGACAATGAGGTagatgaagaagaggaagaaggtggggaggaagaggaggaggaagaaggtgatggtgaggaagaggatggagatgaagatgaggaagCTGAGACAGCTACGGGCAAGCGGGCAGCTGAAGATGATGAGGATGACGATGTCGATACCAAGAAGCAGAAGACCGACGAGGATGACTAGACAGCAAAAAAGGAAAAGTTAAACTAAAAAAAAAGGC	.	Long RNA	CTB-161M19.3	.	Long RNA	DTWD2	.	-75.2	0.745893	0.732482	0.860071	No	0.285
782	chr5	122881179	122881526	Y	+	6	120	6.90273	16.6652	12.0326	.	.	.	exon	sense	347	AAGAAAAATTTTACGAATGGGATGAACATGCTCCAGTTAATTGACTACCTACTGCAATTTGAATGTTAACATTACCCATCTGGTACAGTTACCTAGTGATGTACCTATTTTCACAATACCCTGTTTCAGTGTGCTTGTCTTGATTAAAGAATTCAAAGTGGAGTACCGCAAACTTGATATGGAAAATAAAAAGAAAGACAAGGACAAATCAGATGATAGAATGGCACGACCTAGTGGTCGATCGGGACACAACACTCGAGGAACTGGGTCTTCATCGTCTGGAGTTTTAATGGTTGGACCTAACTTTAGAGTTGGAAAAAAAATTGGATGTGGCAATTTTGGAGAAT	.	RBP	CSNK1G3	IGF2BP1	.	.	.	-78.6	0.980795	0.909219	0.914104	T26274	0.226
783	chr5	132575679	132575954	Y	+	5	78	5.83957	12.2341	7.83632	.	.	.	.	sense	275	ggcaacacgctgggattcctttccacgcagtggaagctttgttcttttgctctttgcaataaatgctgctgctcactctttaggtttacactgactttatcagctgcaacactcaccctgaaggtctgcagctgcacttctgaagccagcgagaccacgaacccaccagaaggaagaaactccaaacgcatccgagcatcagaaggaacaaactctggacacgctgcctttaagaactgtgacactcactgcgagggtccgcggcttcattcttg	.	Repeats	LTR12C	.	.	.	.	-72.9	0.0683127	0.0681527	0.07048	No	0.233
784	chr5	137089452	137090057	Y	-	8	176	8.88093	22.4189	17.6474	.	.	ALL_AGO|slc12203_chr5|47|3|10|0.30|COORDS=chr5-:137117545;ALL_AGO|slc12202_chr5|40|2|7|0.29|COORDS=chr5-:137117480;ALL_AGO|slc12201_chr5|51|3|7|0.43|COORDS=chr5-:137117425	exon	sense	605	GCGGCCTCTTTGTGTGGTGCCCAGATAGGGGAgcggaggtggcggcggcggcggtagcggtggcCTTGGTTGTCTTCCAGTCTCCTCGGCTCGCCCTTTAGCCGGCACCGctccccttccctcccccttcctctcttccttccttccctccccttccctttttcccttcccCGTCGGTGAGCGGCGGGGGTGGCTCCAGCAACGGCTGGGCCCAAGCTGTGTAGAGGCCTTAACCAACGATAACGGCGGCGACGGCGAAACCTCGGAGCTCGCAGGGCGGGGGCAAGGCCCGGGCCTTGGAGATGGAGAATTCTCAGTTGTGTAAGCTGTTCATCGGCGGCCTCAATGTGCAGACGAGTGAGTCGGGCCTGCGCGGCCACTTTGAGGCCTTTGGGACTC…	.	RBP	HNRNPA0	FTO	.	.	.	-258.7	0.929428	0.923213	0.876476	T5660	0.967
785	chr5	138941025	138941384	Y	+	5	88	5.89401	13.3349	8.88112	.	.	.	exon	sense	359	CCGGCCGAGCCCGAGGCTTGGGCTTTTGCTTTCTGGCGGAGGGATCTGCGGCGGTTTAGGAGGCGGCGCTGATCCTGGGAGGAAGAGGCAGCTAcggcggcggcggcggtggcggctagggcggcggcgAATAAAGGGGCCGCCGCCGGGTGATGCGGTGACCGCTGCGGCAGGCCCAGGAGCTGAGTGGGCCCCGGCCCTCAGCCCGTCCCGCCGGACCCGCTTTCCTCAACTCTCCATCTTCTCCTGCCGACCGAGATCGCCGAGGCGGCCTCAGGCTccctagccccttccccgtcccttccccgcccccgtccccgccccgggggccgccgccacccgcctccCACCATGGCTCT	.	RBP	UBE2D2	U2AF1	.	.	.	-179.5	0.521691	0.755696	0.77322	No	0.7
786	chr5	149473847	149474033	Y	+	7	147	7.88884	19.4195	14.7016	.	.	.	pseudogene	sense	186	TTTTTCCGGCTGGAACCATGGAGGGTGTAGAAGAGAAGAAGAAGGAGGTTCCTGCTGTGCCAGAAACCCTTAAGAAAAAGCGAAGGAATTTCGCAGAGCTGAAGATGAAGCGCCTGAGAAAGAAGTTTGCCCAAAAGATGCTTCGAAAGGCAAGGAGGAAGCTTATCTATGAAAAAGCAAAGCACT	.	Long RNA	CTB-13H5.1	.	Long RNA	CSF1R	.	-41.2	0.957876	0.942376	0.939516	No	0.068
787	chr5	149474137	149474496	Y	+	7	147	7.88884	19.4195	14.7016	.	.	.	pseudogene	sense	359	GTCATCAGAATCAGAGGTATCAATGGAGTGAGCCCAAAGGTTCGAAAGGTGTTGCAGCTTCTTCGCCTTCGTCAAATCTTCAATGGAACCTTTGTGAAGCTCAACAAGGCTTCGATTAACATGCTGAGGATTGTAGAGCCATATATTGCATGGGGGTACCCCAATCTGAAGTCAGTAAATGAACTAATCTACAAGCGTGGTTATGGCAAAATCAATAAGAAGCGAATTGCTTTGACAGATAACGCTTTGATTGCTCGATCTCTTGGTAAATACGGCATCATCTGCGTGGAGGATTTGATTCATGAGATCTATACTGTTGGAAAACGCTTCAAAGAGGCAAATAACTTCCTGTGGCCCTT	.	Long RNA	CTB-13H5.1	.	Long RNA	CSF1R	.	-87.2	0.878265	0.911568	0.978579	No	0.512
788	chr5	149781300	149781795	Y	-	7	136	7.84765	18.3082	13.6667	.	.	.	exon	sense	495	AGAGGCGGTCTTCAACATCCTGCCAGCCCCACACAGCTACAGCTTTCTTGCTCCCTTCAGCCCCCAGCCCCTCCCCCATCTCCCACCCTGTACCTCATCCCATGAGACCCTGGTGCCTGGCTCTTTCGTCACCCTTGGACAAGACAAACCAAGTCGGAACAGCAGATAACAATGCAGCAAGGCCCTGCTGCCCAATCTCCATCTGTCAACAGGGGCGTGAGGTCCCAGGAAGTGGCCAAAAGCTAGACAGATCCCCGTTCCTGACATCACAGCAGCCTCCAACACAAGGCTCCAAGACCTAGGCTCATGGACGAGATGGGAAGGCACAGGGAGAAGGGATAACCCTACACCCAGACCCCAGGCTGGACATGCTGACTGTCCTCTCCCCTCCAGCCTTTG…	.	RBP	CD74	DDX55	.	.	.	-142.9	0.150857	0.0281778	0.0493657	T12677	0.005
789	chr5	149786770	149786867	Y	-	9	182	9.77897	23.0271	18.2434	.	.	.	exon	sense	97	TGTACACAGGCTTTTCCATCCTGGTGACTCTGCTCCTCGCTGGCCAGGCCACCACCGCCTACTTCCTGTACCAGCAGCAGGGCCGGCTGGACAAACT	.	RBP	CD74	DDX3X	.	.	.	-28.4	0.859175	0.971474	0.963639	No	0.144
790	chr5	149823793	149823917	Y	-	21	493	21.3564	54.5231	49.3096	.	.	.	exon	sense	124	GAGGATGTCACCCCCATCCCCTCTGACAGCACTCGCAGGAAGGGGGGTCGCCGTGGTCGCCGTCTGTGAACAAGATTCCTCAAAATATTTTCTGTTAATAAATTGCCTTCATGTAAACTGTTTC	.	RBP	RPS14	PUM2	.	.	.	-26.2	0.790145	0.775282	0.730984	T27554,T27107	0.624
791	chr5	149827159	149827346	Y	-	47	1284	46.5957	134.11	128.468	.	.	.	exon	sense	187	TGGAAATGTTTTGTCTGTTAACCTTGAGTTTCTTTTCCTTCCACTCAGAAATGGCACCTCGAAAGGGGAAGGAAAAGAAGGAAGAACAGGTCATCAGCCTCGGACCTCAGGTGGCTGAAGGAGAGAATGTATTTGGTGTCTGCCATATCTTTGCATCCTTCAATGACACTTTTGTCCATGTCACTGA	.	RBP	RPS14	BUD13	.	.	.	-49.2	0.77469	0.74069	0.754925	T27554,T15717,T16176	0.191
792	chr5	156644185	156644264	Y	+	51	1433	50.6096	149.095	143.335	.	.	.	.	sense	79	tgagaggaaggagagagagaaagagaaagagagaggagaagagaagagaaaggaggaaagagggaagagagaggagagC	.	Repeats	GA-rich	.	.	.	.	0	0.0684937	0.00121519	0.00143038	No	1
793	chr5	165809440	165809630	Y	+	6	115	6.88648	16.1893	11.5956	.	.	ALL_AGO|slc13438_chr12|41|3|8|0.38|COORDS=chr12-:119118918	pseudogene	sense	190	TGAAAAGGTCAAGGCCTTCTTGGCTGATCCATCTGCCTTTGTGgctgctgcccctgtggctgctgccaccacagctgctcctgctgctgctgcAGCCCCAGCTAAGGTTGAAGCCAAGGAAGAGTCGGAGGAGTCGGACGAGGATATGGGATTTGGTCTCTTTGACTAATCACCAAAAAGCAACCAACTT	.	Long RNA	CTB-63M22.1	.	.	.	.	-63.9	0	0.923011	0.940763	No	0.069
794	chr5	168043390	168043737	Y	+	11	245	11.7822	29.4868	24.5484	.	.	.	pseudogene	sense	347	GTAAGAACAAGCCGTACCCAAAGTCTCGCTTCTGCCGAGGTGTCCCTGATGCCAAGATTCGCATTTTTGACCTGGGGCGGAAAAAGGCAAAAGTGGATGAGTTTCCACTTTGTGGCCACATGGTGTCAGATGAATATGAGCAGCTGTCCTCTGAAGCCCTGGAGGCTGCCCGAATTTGTGCCAATAAGTACATGGTAAAAAGTTGTGGCAAAGATGGCTTCCATATCCGGGTGCGGCTCCACTCCTTCCACGTCATCCGCATCAACAAGATGTTGTCCTGTGCTGGGGCTGACAGGCTCCAAACAGGCATGCGAGGTGCCTTTGGAAAGCCCCAGGGCACTTTGGCC	.	Long RNA	CTC-575D19.1	.	.	.	.	-127.9	0.844634	0.931357	0.999744	No	0.003
795	chr5	168043835	168044039	Y	+	15	359	15.7096	41.0602	35.9348	.	.	.	pseudogene	sense	204	TGGCCGCCAGAAGATCCACATCTCAAAGAAGTGGGGCTTCACCAAGTTCAATGCTGATGAATTTGAAGACATGGTGGCTGAAAAGCGGCTCATCCCAGATGGCTGTGGGGTCAAGTACATCCCCAATCGTGGCCCTCTGGACAAGTGGCGGGCCCTGCACTCATGAGGGCTTCCAATGTGCTGCCCCCCTCTTAATACTCACCA	.	Long RNA	CTC-575D19.1	.	.	.	.	-73.1	0.733176	0.764912	0.882828	No	0.004
796	chr5	173315355	173315489	Y	+	16	396	16.7243	44.8678	39.6919	.	.	.	exon	sense	134	GGCTCGGTCCTGAGGAGAAGGACTCAGCCGCGGCTGCGGGACCCGGGCACCGGGAggcggtggcggcggcggcggcggcagcagcggcgacagcagaggaggaagaggaggaagaaggaaagaaaaagaagaaC	.	RBP	CPEB4	DDX3X	.	.	.	-48.6	0.92047	0.777067	0.79497	No	0.003
797	chr5	177482726	177483187	Y	+	16	303	16.0489	35.4379	30.3982	.	.	.	pseudogene	sense	461	CCGGAAGCTCATCAAAGACGGGCTGATCATCCGCAAGCCTGTGACGGTCCATTCCCGGGCTCGATGCCGGAAAAACACCTTGGCCCGCCGGAAGGGCAGGCACGTGGCCATAGGTGAGCAGAAGGGTACAGCCAATGCCCGAATGCCAGAGAAGGTCACATGGATGAGGAGAATGACGATTTTGCGCCGGCTGCTCAGAAGATACCGTGAATCTAAGAAGATCGATCGCCACACGTATCACAGCCTGTACCTGAAGGTGAAGGGGAATGTGTTCAAAGACAAGCGGATTCTCATGGAACACATCCACAAGCTGAAGGCAGACAAGGCCCGCAAGAAGCTCCTGGCTGACCAGGCTGAGGCCCGCAGGTCTAAGACCAAGGAAGCAGGCAAGTGCCCTGA…	.	Long RNA	RP11-889L3.1	.	.	.	.	-149.4	0.424633	0.648987	0.993714	No	0.142
798	chr5	179151692	179151781	Y	+	41	1125	40.9597	118.156	112.529	.	.	.	exon	sense	89	TGCACCTCAACCGGATGTGAaggaagaggaagaagagaaggaagaggaaaaggacaagggagatgaggaggaggaaggagaagagAAAC	.	RBP	CANX	EIF4G2	.	.	.	-6.8	0.827416	0.943742	0.896798	No	0.079
799	chr5	179213247	179213358	Y	+	35	889	34.8208	94.5136	88.9904	.	.	.	Intergenic	sense	111	TGgaggaggaggaagaaaagaagaggaaggagaaagagaaggaagaagaagaaaggaagaagaagaagaggaggaggagagaagaaagaaggaagaaagaagaaagaagaa	.	Repeats	GA-rich	.	.	.	.	0	0.0597455	0.0451	0.0477273	No	1
800	chr5	180048007	180048105	Y	-	9	170	9.70745	21.7807	17.0399	.	.	.	intron	sense	98	GTAGGGAGGGTGGCCCTGGCGAAGGGCAGGTCCGGAGGCCCGCGAGGCCGACGATCCCAAACCCAGGTGGACCCGCACCTCCACCCCACCCCCTGCAG	Y	Long RNA	FLT4	.	.	.	.	-46.3	0.288255	0.0709592	0.0767041	T17833	0.062
801	chr5	180262075	180262150	Y	+	7	136	7.84713	18.2961	13.633	.	.	.	.	sense	75	tggtagcatggcttggtctaagttggaaggcctgagaaacaagcacatggtggaactgagttcaaggataaagac	.	Repeats	MLT2B3	.	.	.	.	-15.9	0.0203067	0.0202	0.0237733	No	0.158
802	chr6	3091169	3091277	Y	+	5	94	5.91663	13.9689	9.44617	.	.	.	intron	sense	108	AGTAACCGCAGCGCGCCTACCTGCCGCACCTAGTAACCGCAGCGCGCCTACCTGCCGCACCTAGTAACCGCAGCGCGCCTACCTGCCGCACCTAGTAACCGCAGCGCG	.	Long RNA	RIPK1	.	.	.	.	-26.8	0.008	0.008	0.00592593	No	0.677
803	chr6	5788739	5788842	Y	-	11	252	11.8089	30.1772	25.2671	.	.	.	pseudogene	sense	103	GTTTACCTTTATACCAAGAAGGTTGGGAAAGCACCAAAATCTGCATGTGGCGTGTGCCCAGGCAGACTTCGAGGGGTTCTTGCTGTAAGACCTAAAGTTCTTA	.	Long RNA	RP1-182O16.1	.	.	.	.	-24.7	0.489136	0.421981	0.998903	No	0.399
804	chr6	7339208	7339340	Y	-	10	208	10.7569	25.7144	20.875	.	.	ALL_AGO|slc3863_chr11|51|3|9|0.33|COORDS=chr11+:74792840	pseudogene	sense	132	CGGCCTGATGATCCACAGCAGAGACCCTGTTAACTACTACGTTGACACTGCTGTGCGCCATGTGTTGCTCAGACAGAGTGTGCTGGGCATCAAGGTGAAGATCATGCTGCCCTGGGACCCAACTGGTAAGAT	.	Long RNA	CAGE1	.	.	.	.	-45.8	0.104561	0.116977	0.99947	No	0.031
805	chr6	7339489	7339651	Y	-	13	290	13.6906	33.9913	29.0119	.	.	.	intron	sense	162	TTAGCCACCAGAACACAGAATGTTCTTGGTGAGAAGGGCCGGCGGATTCGGGAACTGACTGCTGTAGTTCAGAAGAGGTTTGGCTCTCCAGAGGGCAGTGTAGAGCTTTATGCTGAAGAGGTGGCCACTAGGGGTCTGTGTGCCATTGCCCAGGCAGAGTCT	.	RBP	CAGE1	YBX3	.	.	.	-54.1	0.560204	0.574821	0.998679	No	0.186
806	chr6	12514305	12514611	Y	+	12	255	12.678	30.5419	25.5827	.	.	.	pseudogene	sense	306	CCTTTCCGTCTGGCGGCAGCCATCAGGTAAGCCAAGATGGGTGCATACAAGTACATCCAGGAGCTATGGAGAAAGAAGCAGTCTGATGTCATGCGCTTTCTTCTGAGGGTCCGCTGCTGGCAGTACCGCCAGCTCTCTGCTCTCCACAGGGCTCCCCGCCCCACCCGGCCTGATAAAGCGCGCCGACTGGGCTACAAGGCCAAGCAAGGTTACGTTATATATAGGATTCGTGTTCGCCGTGGTGGCCGAAAACGCCCAGTTCCTAAGGGTGCAACTTACGGCAAGCCTGTCCATCATGGTGTTAAC	.	Long RNA	RPL15P3	.	.	.	.	-105.2	0.268301	0.508637	0.94699	No	0.198
807	chr6	16266891	16267021	Y	+	10	212	10.7771	26.1384	21.2632	.	.	.	.	sense	130	attagccgggcgcagtggcgggcgcctgtagtcccagctactcgggaggctgaggcaggagaattgcatgaacctgggagggggagcttgacggcactccggcctaggtgagagcgagactccgtctcaa	.	Repeats	AluYk4	.	.	.	.	-61.6	0.110387	0.109875	0.1133	No	0
808	chr6	21235739	21235808	Y	+	7	127	7.80184	17.3768	12.7279	.	.	.	Intergenic	sense	69	tgaagagagagagggagggaagagaagaaaggaggggagagaaaaggaagaaaaagaaaaggagaaaag	.	Repeats	A-rich	.	.	.	.	0	0.182638	0.0101014	0.011942	No	1
809	chr6	26021956	26022276	Y	+	7	141	7.86679	18.7823	14.1002	.	.	.	exon	sense	320	GCGCCACCGCAAGGTGTTGCGTGACAACATCCAGGGCATCACCAAGCCGGCCATCCGGCGTCTGGCCCGGCGTGGCGGTGTGAAGCGGATCTCTGGTCTGATCTACGAGGAGACTCGCGGGGTGCTCAAGGTGTTTTTGGAGAACGTGATCCGTGACGCTGTCACCTATACGGAGCACGCCAAGCGCAAGACAGTCACTGCCATGGACGTGGTCTACGCGCTTAAGCGCCAGGGACGCACCCTTTATGGCTTTGGCGGTTAAGGTTGCTGATTTCTCCACAGCTTGCATTTCTGAACCAAAGGCCCTTTTCAGGGCCGCC	.	Long RNA	HIST1H4A	.	.	.	.	-124	0.492906	0.853231	0.878394	No	0.222
810	chr6	26027125	26027514	Y	-	31	898	31.5766	95.3508	89.8497	.	.	.	exon	sense	389	CGCGTACCTGGTTTTTGTTGTCAGCTGGTTAGACATGTCTGGTCGCGGCAAAGGCGGTAAAGGTTTGGGTAAGGGAGGTGCCAAGCGTCACCGAAAAGTGCTGCGGGATAACATCCAAGGCATCACCAAACCGGCCATTCGGCGCCTTGCTAGGCGTGGTGGGGTTAAGCGAATTTCCGGTTTGATTTATGAGGAGACTCGTGGCGTTCTCAAGGTGTTTCTGGAGAACGTGATCCGGGACGCCGTGACCTACACGGAGCACGCCAAGCGCAAGACTGTCACTGCCATGGATGTGGTTTACGCGCTCAAGCGTCAAGGACGCACTCTGTACGGCTTCGGCGGTTAATCTTTTCGTCAGTTTTCTTCCAATGGCCCTTTTCAGGGCCGCC	.	Long RNA	HIST1H4B	.	.	.	.	-138.4	0.0643907	0.637702	0.774553	T12602	0.523
811	chr6	26031822	26032092	Y	-	8	156	8.80107	20.3811	15.6659	.	.	ALL_AGO|slc8504_chr6|53|63|238|0.26|COORDS=chr6-:26139917	exon	sense	270	TGCCGTTCCAGCGCCTGGTGCGAGAAATCGCCCAAGACTTCAAGACCGATCTTCGCTTCCAGAGCTCTGCGGTGATGGCGCTGCAGGAGGCTTGTGAGGCCTACTTGGTAGGGCTCTTTGAGGACACAAACCTTTGCGCCATCCATGCTAAGCGAGTGACTATTATGCCCAAAGACATCCAGCTCGCTCGCCGCATTCGCGGAGAAAGAGCGTAAATGTAAAGTCACTTTTTCATCAGTCTTAAAACCCAAAGGCTCTTTTCAGAGCCAC	.	Long RNA	HIST1H3B	.	.	.	.	-88.9	0.267081	0.847281	0.868941	T37615	0.021
812	chr6	26055967	26056698	Y	-	16	412	16.7751	46.3917	41.2552	.	.	ALL_AGO|slc8526_chr6|82|18|71|0.25|COORDS=chr6-:26164612	exon	sense	731	ATCGGCGCTTTGCCACTTGTACCCGAGTTTTTGATTCTCAACATGTCCGAGACTGCTCCTGCCGCTCCCGCTGCCGCGCCTCCTGCGGAGAAGGCCCCTGTAAAGAAGAAGGCGGCCAAAAAGGCTGGGGGTACGCCTCGTAAGGCGTCTGGTCCCCCGGTGTCAGAGCTCATCACCAAGGCTGTGGCCGCCTCTAAAGAGCGTAGCGGAGTTTCTCTGGCTGCTCTGAAAAAAGCGTTGGCTGCCGCCGGCTATGATGTGGAGAAAAACAACAGCCGTATCAAACTTGGTCTCAAGAGCCTGGTGAGCAAGGGCACTCTGGTGCAAACGAAAGGCACCGGTGCTTCTGGCTCCTTTAAACTCAACAAGAAGGCAGCCTCCGGGGAAGCCAAGCCCAAG…	.	Long RNA	HIST1H1C	.	.	.	.	-263.6	0.271193	0.703914	0.777663	T8055	0.003
813	chr6	26104417	26104563	Y	+	8	174	8.87494	22.2248	17.4343	.	.	ALL_AGO|slc1243_chr6|157|125|421|0.30|COORDS=chr6+:26212388	exon	sense	146	TGTCACAGCCATGGATGTAGTATATGCCCTAAAACGTCAGGGGCGCACTCTGTATGGCTTCGGCGGCTGAATCTAAGAATACGCGGTCTCCTGAGAACTTCAAAAAACAAAAACAAAAAAACCCAAAGGCCCTTTTCAGGGCCGCT	.	RBP	HIST1H4C	PUM2	.	.	.	-35.64	0.0884932	0.600068	0.607226	T12678	0.058
814	chr6	26123696	26123909	Y	-	17	414	17.6564	46.6094	41.4723	.	.	ALL_AGO|slc8530_chr6|71|1|5|0.20|COORDS=chr6-:26231667	exon	sense	213	CGGGCGAGGCTTCCCGCCTGGCGCATTACAACAAGCGCTCGACCATCACCTCCAGGGAGATCCAGACGGCCGTGCGCCTGCTGCTTCCCGGAGAGCTGGCCAAGCACGCCGTGTCGGAGGGCACCAAGGCCGTCACCAAGTACACCAGCTCCAAGTAAACATTCCAAGTAAGCGTCTTAACACCTAACCCCAAAGGCTCTTTTAAGAGCCACC	.	Long RNA	HIST1H2BC	.	.	.	.	-64.5	0.725869	0.851545	0.829296	T15045,T5626	0.236
815	chr6	26123982	26124155	Y	-	11	220	11.6489	26.9432	22.0887	.	.	ALL_AGO|slc8532_chr6|50|2|11|0.18|COORDS=chr6-:26232097	exon	sense	173	CGACACATTTCTGGTGTTTTAAGATGCCTGAGCCAGCCAAGTCTGCTCCCGCCCCGAAGAAGGGCTCCAAGAAGGCAGTGACCAAAGCGCAGAAGAAAGATGGCAAGAAGCGCAAGCGCAGCCGCAAGGAGAGTTACTCTGTGTACGTGTACAAGGTGCTGAAACAGGTCCAT	.	RBP	HIST1H2BC	UCHL5	.	.	.	-41.6	0.512272	0.791751	0.832526	T15045,T5626	0.89
816	chr6	26124605	26124914	Y	+	14	336	14.7502	38.6925	33.6031	.	.	ALL_AGO|slc1254_chr6|49|17|23|0.74|COORDS=chr6+:26232754	exon	sense	309	CGGTGTACCTGGCGGCGGTGTTAGAGTACCTGACCGCCGAGATCCTGGAGCTGGCCGGCAACGCGGCTCGCGACAACAAGAAGACTCGCATCATCCCGCGCCACTTGCAGCTGGCCATCCGCAACGACGAGGAGCTCAACAAACTGCTAGGCCGGGTGACCATTGCTCAGGGCGGCGTCCTTCCTAACATCCAGGCCGTGCTTCTGCCTAAGAAGACCGAGAGTCACCACAAGGCCAAGGGCAAGTGATTTGACAGGTATCTGAGCTCCCGGAAACGCTATCAAACCCAAAGGCTCTTTTCAGAGCCCC	.	RBP	HIST1H2AC	SRSF1	.	.	.	-102.4	0.70611	0.870181	0.874175	T12676,T5602,T35849	0.56
817	chr6	26156998	26157341	Y	+	13	306	13.7669	35.7451	30.6976	.	.	ALL_AGO|slc1269_chr6|46|3|7|0.43|COORDS=chr6+:26265159;ALL_AGO|slc1270_chr6|53|10|28|0.36|COORDS=chr6+:26265256	exon	sense	343	GGCCAAGAAGCCAGCAGGAGCGGCGAAGAAGCCCAAGAAGGCGACGGGGGCGGCCACCCCCAAGAAGAGCGCCAAGAAGACCCCAAAGAAGGCGAAGAAGCCGGCTGCAGCTGCTGGAGCCAAAAAAGCGAAAAGCCCGAAAAAGGCGAAAGCAGCCAAGCCAAAAAAGGCGCCCAAGAGCCCAGCGAAGGCCAAAGCAGTTAAACCCAAGGCGGCTAAACCAAAGACCGCCAAGCCCAAGGCAGCCAAGCCAAAGAAGGCGGCAGCCAAGAAAAAGTAGAAAGTTCCTTTGGCCAACTGCTTAGAAGCCCAACACAACCCAAAGGCTCTTTTCAGAGCCACC	.	Long RNA	HIST1H1E	.	.	.	.	-110.1	0.859778	0.761843	0.807863	T4793	0
818	chr6	26158396	26158833	Y	+	10	230	10.8471	27.9684	23.0443	.	.	ALL_AGO|slc1273_chr6|42|2|6|0.33|COORDS=chr6+:26266477;ALL_AGO|slc1271_chr6|95|12|51|0.24|COORDS=chr6+:26266375	exon	sense	437	GATGCCTGAACCTACCAAGTCTGCTCCTGCCCCAAAGAAGGGCTCCAAGAAGGCGGTGACTAAGGCTCAGAAGAAGGACGGGAAGAAGCGCAAGCGCAGCCGCAAGGAGAGCTATTCAGTGTATGTGTACAAGGTGCTGAAGCAGGTCCATCCCGACACCGGCATCTCTTCCAAGGCAATGGGGATCATGAATTCCTTCGTCAACGACATCTTCGAGCGCATCGCAGGCGAGGCTTCCCGCCTGGCGCATTACAACAAGCGCTCGACCATCACCTCCAGGGAGATCCAGACGGCCGTGCGCCTGCTGCTTCCGGGGGAGCTGGCCAAGCACGCCGTGTCGGAGGGCACCAAGGCCGTCACCAAGTACACCAGTTCCAAGTAACTTTGCCAAGTAAGCAT…	.	RBP	HIST1H2BD	EFTUD2	.	.	.	-142.7	0.632588	0.863833	0.894149	T12675	0.315
819	chr6	26188939	26189488	Y	-	17	434	17.7328	48.6073	43.4567	.	.	ALL_AGO|slc8537_chr6|42|3|7|0.43|COORDS=chr6-:26297057;ALL_AGO|slc8539_chr6|38|2|5|0.40|COORDS=chr6-:26297184	exon	sense	549	GCCTCAGGCCCCTCTTGGTCTCCTCCAGTCTGAGCAAGGGAGAATTGCACAGAAGGGCGGGAACTGACTGTGGTTCCCGCCCCTTCTCATGAGGTTTTCAAACAGGTCCGTCATGCTATTATAAAAGTGCTGCGTGGCTCTGCCAGACGTATTGCGTTACAGATTTAACAGCTGTGGTTTCAAGATGTCTGGCCGCGGTAAGGGCGGAAAGGGTCTAGGTAAGGGTGGCGCCAAGCGTCACCGTAAGGTATTGCGTGACAATATCCAAGGAATCACCAAGCCCGCTATCCGCCGCCTGGCTCGCCGCGGCGGCGTCAAGCGTATTTCTGGCCTCATTTATGAGGAAACTCGCGGAGTGCTGAAAGTTTTCCTGGAAAATGTAATCCGCGATGCTGTCAC…	.	Long RNA	HIST1H4D	.	.	.	.	-205.7	0.135104	0.510395	0.617576	T36732	0.004
820	chr6	26197013	26197442	Y	-	9	182	9.77897	23.0271	18.2434	.	.	ALL_AGO|slc8543_chr6|43|9|19|0.47|COORDS=chr6-:26305107;ALL_AGO|slc1571_chr6|41|3|9|0.33|COORDS=chr6+:27886163;ALL_AGO|slc8542_chr6|59|2|7|0.29|COORDS=chr6-:26304984	exon	sense	429	GGTGGGAAAGCGCCACGCAAGCAGCTGGCCACCAAGGCTGCTCGAAAGAGCGCTCCAGCCACCGGCGGCGTGAAGAAGCCCCACCGTTACCGGCCCGGCACGGTGGCTCTGCGCGAGATCCGCCGCTACCAGAAGTCGACCGAGCTGCTGATTCGCAAACTGCCATTCCAGCGTCTAGTCCGTGAGATCGCGCAGGACTTCAAGACTGATCTGCGTTTTCAGAGCTCGGCGGTGATGGCGCTGCAGGAGGCCTGCGAGGCCTACCTGGTGGGGCTGTTTGAGGACACCAACCTATGCGCCATTCACGCCAAGCGAGTGACTATCATGCCCAAGGACATCCAGCTTGCTCGCCGCATTCGTGGGGAGAGGGCGTAAATTGTCTTGTGAATGTGTGCTAAC…	.	Long RNA	HIST1H3D	.	.	.	.	-171	0.469012	0.816266	0.908228	T38401,T38422	0.047
821	chr6	26199013	26199454	Y	-	8	172	8.8664	21.963	17.2118	.	.	ALL_AGO|slc8549_chr6|52|2|11|0.18|COORDS=chr6-:26307020;ALL_AGO|slc8552_chr6|53|6|12|0.50|COORDS=chr6-:26307141;ALL_AGO|slc8761_chr6|51|5|7|0.71|COORDS=chr6-:27968540;ALL_AGO|slc8554_chr6|76|5|11|0.45|COORDS=chr6-:26307429	exon	sense	441	GCAAGGCGGAAAGGCCCGAGCTAAGGCTAAGACCCGCTCTTCGCGGGCCGGACTCCAGTTCCCTGTGGGCCGCGTACACCGCTTGCTCCGCAAGGGCAACTACTCCGAGCGAGTCGGGGCCGGCGCGCCAGTGTATCTGGCGGCGGTGTTGGAGTACCTGACCGCCGAGATCCTGGAGCTGGCGGGCAACGCCGCCCGCGACAACAAGAAGACCCGCATCATCCCCCGACACCTGCAGCTGGCCATCCGCAACGACGAGGAGCTAAACAAGTTGCTGGGTAAAGTCACAATTGCTCAGGGCGGTGTTCTGCCCAACATCCAGGCTGTACTGCTCCCCAAGAAGACTGAGAGTCACCACAAGGCCAAGGGCAAGTAAAACGAGAACTCTTATATTGGCTT…	.	Long RNA	HIST1H2AD	.	.	.	.	-164.3	0.224857	0.663304	0.848934	T38422	0.054
822	chr6	26199810	26200213	Y	+	9	194	9.83349	24.2792	19.4448	.	.	ALL_AGO|slc1273_chr6|42|2|6|0.33|COORDS=chr6+:26266477	exon	sense	403	CCTGCTCCAAAAAAGGGCTCCAAAAAGGCGGTGACCAAGGCGCAGAAGAAGGATGGTAAGAAGCGCAAGCGTAGCCGCAAGGAGAGCTATTCCGTGTACGTGTACAAGGTGCTAAAGCAGGTCCACCCCGACACCGGCATCTCATCCAAGGCCATGGGCATCATGAACTCCTTCGTCAACGATATCTTCGAGCGCATCGCTGGCGAGGCTTCCCGCCTGGCGCATTACAACAAGCGCTCCACCATCACCTCCAGGGAGATCCAGACGGCCGTACGCCTGCTGCTGCCCGGGGAGCTGGCTAAGCACGCCGTGTCAGAGGGCACCAAGGCCGTCACCAAGTACACCAGCTCTAAGTAATTCTAACGTCTTCATACCCAATCCCAAAGGCTCTTTTAAGAG…	.	Long RNA	HIST1H2BF	.	.	.	.	-124.1	0.378238	0.869139	0.908893	T9527	0.249
823	chr6	26204729	26205247	Y	+	18	422	18.5294	47.404	42.2017	.	.	ALL_AGO|slc1298_chr6|73|2|8|0.25|COORDS=chr6+:26313041;ALL_AGO|slc1299_chr6|62|7|34|0.21|COORDS=chr6+:26313124;ALL_AGO|slc1296_chr6|48|52|75|0.69|COORDS=chr6+:26312921	exon	sense	518	TGAAGGGTAGGGCCAGCAGGCAGCACCAAAGTTCCCGTATGCGCGTTTTCAGTCTTCATTTAGGTCCGAATTCCCGGCATATAAGAATACTACCGTCGCTTGTTTTTCAGATTTTTGCGGCTATTTTCGTTGGTGTGTTGGTCATGTCTGGTCGCGGCAAAGGCGGAAAGGGACTGGGTAAAGGAGGCGCTAAGCGTCACCGTAAGGTCCTGCGAGATAACATCCAGGGCATTACCAAGCCTGCCATCCGGCGCCTTGCTCGTCGCGGGGGTGTCAAGCGCATTTCTGGTCTCATCTACGAGGAGACTCGCGGGGTTCTGAAGGTGTTTCTGGAAAACGTGATTCGTGATGCTGTGACTTACACGGAGCACGCCAAACGCAAGACAGTGACAGCGATGG…	.	Long RNA	HIST1H4E	.	.	.	.	-164.2	0.0588591	0.356286	0.660014	T36845	0.967
824	chr6	26217166	26217664	Y	+	18	398	18.3776	45.0337	39.8553	.	.	.	exon	sense	498	GTGGATTGTTAGTTCTTCTGCTGTTAGGAAGCCACTATGTCTGGACGTGGAAAGCAAGGCGGCAAAGCTCGGGCAAAAGCTAAAACGCGTTCTTCCAGGGCCGGTCTTCAGTTTCCAGTTGGCCGTGTGCACCGCCTCCTCCGCAAAGGCAACTACTCCGAACGAGTCGGGGCCGGCGCTCCAGTGTACCTGGCAGCGGTGCTGGAATATCTGACGGCCGAGATCTTAGAGCTAGCTGGCAACGCGGCTCGCGACAATAAGAAGACCCGCATCATCCCGCGCCACCTGCAGCTAGCCATCCGCAACGACGAGGAGCTAAATAAGCTTCTAGGTCGCGTGACCATCGCGCAGGGCGGTGTCCTGCCCAACATCCAGGCCGTATTGCTGCCTAAGAAGACG…	.	Long RNA	HIST1H2AE	.	.	.	.	-169.9	0.319693	0.712261	0.789145	T4765	0.222
825	chr6	26240817	26241024	Y	+	15	357	15.702	40.8751	35.752	.	.	.	exon	sense	207	CCGCGGTGTTCTTAAGGTGTTCCTGGAGAATGTGATACGGGACGCCGTAACCTACACGGAGCACGCCAAGCGTAAGACAGTCACTGCAATGGATGTTGTCTACGCGCTCAAGCGCCAGGGACGCACTCTGTACGGCTTTGGTGGCTGAGCCTCACCCCGGCTTTTTATTTAACAGCTCACCCATAAAAGGCCCTTTTCAGGGCCACC	.	Long RNA	HIST1H4F	.	.	.	.	-69.6	0.170444	0.744845	0.786551	T12671	0.106
826	chr6	26250370	26250863	Y	-	6	118	6.89609	16.4617	11.8784	.	.	.	exon	sense	493	AGTTGTGACCATTGCTTGAAACCCATTCCTATGGCACGCACGAAGCAAACAGCTCGTAAGTCCACTGGCGGCAAAGCCCCGCGCAAGCAGCTGGCCACTAAGGCGGCTCGCAAAAGCGCGCCAGCCACCGGTGGCGTGAAGAAGCCCCACCGCTACAGGCCTGGTACTGTCGCCCTCCGTGAAATCCGCCGCTATCAGAAATCGACTGAGCTACTGATTCGCAAGCTACCATTCCAGCGTCTGGTACGTGAGATCGCGCAGGACTTCAAGACCGACCTGCGCTTCCAGAGCTCGGCTGTGATGGCGCTGCAGGAGGCCTGCGAGGCTTACCTGGTGGGGCTCTTTGAGGACACCAACCTGTGTGCTATCCACGCCAAGCGAGTGACTATCATGCCCAAG…	.	Long RNA	HIST1H3F	.	.	.	.	-185.3	0.383544	0.837961	0.8604	No	0.011
827	chr6	26285355	26285504	Y	-	7	145	7.88124	19.1868	14.5188	.	.	ALL_AGO|slc8567_chr6|48|13|41|0.32|COORDS=chr6-:26393343;ALL_AGO|slc1299_chr6|62|7|34|0.21|COORDS=chr6+:26313124	exon	sense	149	AGCACGCCAAACGCAAGACCGTGACAGCAATGGATGTGGTCTACGCGCTGAAGCGACAGGGACGCACTCTTTACGGCTTCGGTGGCTAAGGCTCCTGCTTGCTGCACTCTTATTTTCATTTTCAACCAAAGGCCCTTTTCAGGGCCGCC	.	RBP	HIST1H4H	DDX3X	.	.	.	-45.6	0.0876107	0.705752	0.720201	T38410,T38384,T12668,T38357	0.182
828	chr6	27100096	27100281	Y	-	7	148	7.89416	19.592	14.8933	.	.	ALL_AGO|slc8624_chr6|81|3|24|0.12|COORDS=chr6-:27208068	exon	sense	185	TTACAACAAGCGCTCGACCATCACCTCCAGGGAGATCCAGACGGCCGTGCGCCTGCTGCTGCCTGGGGAGTTGGCCAAGCACGCCGTGTCCGAGGGTACTAAGGCCGTCACCAAGTACACCAGCGCTAAGTAAACAGTGAGTTGGTTGCAAACTCTCAACCCTAACGGCTCTTTTAAGAGCCACC	.	RBP	HIST1H2BJ	SLBP	.	.	.	-57.3	0.467259	0.791849	0.834195	T36124	0.237
829	chr6	27101064	27101311	Y	+	7	147	7.88884	19.4195	14.7016	.	.	ALL_AGO|slc1458_chr6|63|22|69|0.32|COORDS=chr6+:27209066	exon	sense	247	GCGACAACAAGAAGACCCGCATCATCCCGCGTCATCTCCAACTGGCCATCCGCAACGACGAGGAGCTCAACAAGCTGCTGGGCAAAGTCACCATCGCACAGGGCGGTGTCCTGCCCAACATTCAGGCCGTGCTACTGCCCAAAAAGACTGAGAGCCACCACAAGGCGAAGGGCAAGTAACTATCTGTACTAGTTTGTGGCAGCTCAAGTAAAATCGAGTCCAAACCAACGGCTCTTTTCAGGGCCAC	.	RBP	HIST1H2AG	MTPAP	.	.	.	-64.7	0.603972	0.78798	0.80504	T9406	0.428
830	chr6	27114141	27114576	Y	-	20	535	20.7149	58.7997	53.5476	.	.	ALL_AGO|slc8639_chr6|90|499|706|0.71|COORDS=chr6-:27222535;ALL_AGO|slc20265_chr1|48|3|9|0.33|COORDS=chr1-:148124676;ALL_AGO|slc8751_chr6|49|2|5|0.40|COORDS=chr6-:27883465;ALL_AGO|slc8638_chr6|47|3|5|0.60|COORDS=chr6-:27222316	exon	sense	435	TGCCGGAACCAGCGAAGTCCGCTCCCGCGCCCAAGAAGGGCTCGAAGAAAGCCGTGACTAAGGCGCAGAAGAAGGACGGCAAGAAGCGCAAGCGCAGCCGCAAGGAGAGCTACTCCGTATACGTGTACAAGGTGCTGAAGCAGGTCCACCCCGACACCGGCATCTCCTCTAAGGCCATGGGAATCATGAACTCCTTCGTCAACGACATCTTCGAACGCATCGCGGGTGAGGCTTCCCGCCTGGCGCATTACAACAAGCGCTCGACCATCACCTCCAGGGAGATCCAGACGGCCGTGCGCCTGCTGCTGCCCGGGGAGTTGGCCAAGCACGCCGTGTCCGAGGGCACCAAGGCCGTCACCAAGTACACCAGCGCTAAGTAAACTTGCCAAGTAAGCGTCT…	.	Long RNA	HIST1H2BK	.	.	.	.	-143.1	0.676076	0.867595	0.909476	T9024	0.407
831	chr6	27777828	27778311	Y	+	8	167	8.85014	21.5078	16.742	.	.	ALL_AGO|slc1571_chr6|41|3|9|0.33|COORDS=chr6+:27886163;ALL_AGO|slc1570_chr6|47|5|11|0.45|COORDS=chr6+:27886141	exon	sense	483	GAAGTGAATCTAGCTCTGAAGGCATGGCGCGTACGAAGCAGACTGCTCGCAAGTCCACCGGCGGCAAGGCTCCGCGCAAGCAGCTGGCCACCAAGGCGGCTCGGAAGAGCGCTCCGGCCACCGGCGGTGTCAAGAAGCCCCATCGCTATCGGCCTGGTACAGTGGCTCTCCGCGAGATTCGCCGCTACCAGAAGTCCACCGAGCTGCTGATCAGAAAGCTGCCTTTTCAGCGTCTGGTGCGTGAGATCGCGCAGGACTTCAAGACCGACTTGCGCTTCCAGAGCTCCGCGGTGATGGCGCTGCAAGAGGCATGCGAGGCCTACCTGGTGGGGCTCTTTGAGGACACCAACCTGTGCGCCATCCACGCCAAGCGGGTGACTATCATGCCCAAGGACATCC…	.	Long RNA	HIST1H3H	.	.	.	.	-192.7	0.33742	0.812286	0.873267	T10736	0.091
832	chr6	27782039	27782513	Y	-	7	114	7.70957	16.012	11.4496	.	.	ALL_AGO|slc1467_chr6|63|16|59|0.27|COORDS=chr6+:27223123;ALL_AGO|slc1458_chr6|63|22|69|0.32|COORDS=chr6+:27209066;ALL_AGO|slc1457_chr6|48|2|5|0.40|COORDS=chr6+:27208997	exon	sense	474	TGGGCGTGGTAAGCAGGGAGGCAAAGCTCGCGCCAAGGCCAAGACCCGCTCTTCTCGGGCCGGGCTTCAGTTTCCCGTAGGCCGAGTGCATCGCCTGCTCCGCAAAGGCAACTATGCGGAGCGGGTCGGTGCTGGAGCGCCGGTGTACCTGGCGGCGGTGCTGGAGTACCTGACCGCCGAGATCCTGGAGCTGGCTGGCAACGCGGCCCGCGACAACAAGAAGACTCGCATCATCCCGCGTCACCTCCAGCTGGCCATCCGCAACGATGAGGAGCTCAACAAGCTTCTGGGCAAAGTCACCATCGCACAGGGTGGCGTCCTGCCCAACATCCAGGCCGTGCTGCTGCCAAAGAAAACTGAGAGCCACCACAAGACTAAGTAAAGACCGAGTTGAAAAGC…	.	Long RNA	HIST1H2AJ	.	piRNA	piR-45268	.	-181.9	0.565914	0.790485	0.827	T7044	0.005
833	chr6	27792016	27792255	Y	+	11	229	11.7028	27.8327	22.92	.	.	.	exon	sense	239	GCTCGCCGCGGCGGCGTGAAGCGCATCTCCGGCCTCATCTACGAGGAGACTCGCGGGGTGCTGAAGGTGTTCCTGGAGAACGTGATCCGGGACGCCGTGACCTATACAGAGCACGCCAAGCGCAAGACGGTCACCGCCATGGATGTGGTCTACGCGCTCAAGCGCCAGGGCCGCACCCTCTACGGTTTCGGTGGTTGAGCGTCCCTTTCTATCAATAAAAGGCCCTTTTCAGGGCCACC	.	Long RNA	HIST1H4J	.	.	.	.	-98.9	0.419213	0.858782	0.89187	T8726	0.072
834	chr6	27798953	27799338	Y	-	13	277	13.6186	32.6905	27.733	.	.	.	exon	sense	385	ACAAAGCGTTGGGTGAGACTCCTCTTGCTCGTCATGTCTGGCCGCGGCAAAGGCGGGAAGGGTCTTGGCAAAGGCGGCGCTAAGCGCCACCGTAAAGTACTGCGCGACAATATCCAGGGCATCACCAAGCCGGCCATCCGGCGCCTTGCTCGCCGCGGCGGCGTGAAGCGCATCTCCGGCCTCATCTACGAGGAGACTCGCGGGGTGCTGAAGGTGTTCCTGGAGAACGTGATCCGGGACGCCGTGACCTATACAGAGCACGCCAAGCGCAAGACGGTCACCGCCATGGATGTGGTCTACGCGCTCAAGCGCCAGGGCCGCACCCTCTACGGTTTCGGTGGTTGAGCGTCCCTTTCTATCAACAAAAGGCCCTTTTTAGGGCCCC	.	Long RNA	HIST1H4K	.	piRNA	piR-36107	.	-164	0.564803	0.715849	0.823587	T36462	0.021
835	chr6	27834571	27834925	Y	-	5	83	5.86738	12.7408	8.31952	.	.	.	exon	sense	354	CCGCTAAAGCTAAGAAGCCCGCGGGGGCCACGCCTAAGAAGGCCAAGAAGGCTGCAGGGGCGAAAAAGGCAGTGAAGAAGACTCCGAAGAAGGCGAAGAAGCCCGCGGCGGCTGGCGTCAAAAAGGTGGCGAAGAGCCCTAAGAAGGCCAAGGCCGCTGCCAAACCGAAAAAGGCAACCAAGAGTCCTGCCAAGCCCAAGGCAGTTAAGCCGAAGGCGGCAAAGCCCAAAGCCGCTAAGCCCAAAGCAGCAAAACCTAAAGCTGCAAAGGCCAAGAAGGCGGCTGCCAAAAAGAAGTAGGAAGCTGGCGTGTGAAAACCGCAACAAAGCCCCAAAGGCTCTTTTCAGAGCCACC	.	Long RNA	HIST1H1B	.	.	.	.	-127	0.449723	0.450263	0.704427	No	0
836	chr6	27839677	27840083	Y	-	9	182	9.77897	23.0271	18.2434	.	.	.	exon	sense	406	CAAAGCAAACAGCTCGCAAGTCCACCGGCGGCAAAGCGCCGCGCAAGCAGCTGGCCACCAAGGCGGCTCGCAAGAGCGCTCCGGCCACCGGTGGCGTCAAGAAGCCCCACCGCTACCGCCCCGGCACCGTGGCCCTGCGCGAGATCCGCCGCTACCAGAAGTCGACCGAGCTGCTAATCCGGAAGCTACCTTTTCAGCGCTTGGTACGGGAGATCGCACAGGACTTTAAGACCGATCTGCGCTTCCAGAGCTCGGCGGTGATGGCGCTGCAGGAGGCTTGCGAGGCCTACCTGGTGGGGCTATTTGAGGATACCAACCTGTGCGCCATTCACGCCAAACGCGTCACTATTATGCCTAAAGACATCCAGCTTGCGCGCCGCATCCGAGGGGAGAGGGCAT…	.	Long RNA	HIST1H3I	.	.	.	.	-155.2	0.465727	0.919355	0.951906	T37018	0.153
837	chr6	27840926	27841312	Y	-	16	394	16.7144	44.6025	39.4909	.	.	.	exon	sense	386	GTTGCATTTTGTTTagtacaagacatgtctgggcgcggcaaaggcgggaaggGTCTGGGCAAAGGAGGCGCTAAGCGCCACCGCAAAGTTCTGCGCGACAACATTCAGGGCATCACCAAGCCCGCCATCCGACGCCTGGCACGGCGTGGAGGCGTTAAGCGCATCTCAGGCCTTATATACGAGGAGACACGCGGAGTTCTTAAAGTGTTTTTGGAGAATGTAATCCGCGATGCAGTTACCTACACGGAGCACGCCAAACGCAAGACAGTCACAGCCATGGACGTGGTTTACGCGCTCAAGCGCCAGGGCCGCACCCTGTATGGCTTTGGCGGCTGAGTGTTTTACTTACTTACACGGTTCCTCAAAGGCCCTTCTCAGGGCCACCC	.	Long RNA	HIST1H4L	.	.	.	.	-142.2	0.153601	0.668158	0.817684	T37250	0.077
838	chr6	30460565	30460772	Y	+	8	120	8.49646	16.6278	12.0186	.	.	.	exon	sense	207	GCCTTGTGTGCGACTGAGATGCAGGATTTCCTCACGCCTCCCCTATGTGTCTTAGGGGACTCTGGCTTCTCTTTTTGCAAGGGCCTCTGAATCTGTCTGTGTCCCTGTTAGCACAATGTGAGGAGGTAGAGAAACAGTCCACCTCTGTGTCTACCATGACCCCCTTCCTCACACTGACCTGTGTTCCTTCCCTGTTCTCTTTTCTAT	.	RBP	HLA-E	LARP4	.	.	.	-56.4	0.00970048	0.0323285	0.0361159	T12487	0.04
839	chr6	30461526	30461673	Y	+	5	90	5.9001	13.4913	9.01445	.	.	.	exon	sense	147	tggaaatgtgaggtgcagctgccacagagggcccccaccagggaaatgtctagtgtctagtggatccaggccacaggagagagtgccttgtggagcgctgggagcaggacctgaccaccaccaggaccccagaactgtggagtcagt	.	RBP	HLA-E	LSM11	.	.	.	-45.6	0.583027	0.577136	0.616129	No	0.463
840	chr6	31248084	31248327	N	+	12	275	12.7704	32.4885	27.5029	.	.	.	pseudogene	sense	243	GATGGCGTGATGTCTCACAGAAAGTTCTCCACTCCCAGACATGGGTCCCTCGGCTTCCTGCCTTGGAAGCGCAGCAGCAGGCATCGTGGGAAGGTGAAGAGCTTCCCTAAGGATGACCCGTCCAAGCCGGTCCACCTCACAGCCTTCCTGGGATACAAGGCTGGCATGACCCACATCGTGCGGGAAGTCGACAGGCCAGGATCCAAGGTGAACAAGAAGGAGGTGGTGGAGGCTGTGACCATT	.	Long RNA	RPL3P2	.	Long RNA	HLA-B	.	-88.7	0	0	0	No	0.131
841	chr6	31548538	31548697	Y	-	5	70	5.78218	11.4153	7.06661	.	.	.	exon	sense	159	CCGAGCTGCTGCTCGAGGGCGCCGAGACGGTGACTCCAGTGCTGGACCCGGCCAGGAGACAAGGGTACGGGCCTCTCTGGTACACGAGCGTGGGGTTCGGCGGCCTGGTGCAGCTCCGGAGGGGCGAGAGGGTGTACGTCAACATCAGTCACCCCGATA	.	Long RNA	LTB	.	.	.	.	-69.2	0.728082	0.66656	0.656843	No	0.14
842	chr6	31550045	31550201	Y	-	7	143	7.87662	19.0524	14.3938	.	.	.	exon	sense	156	AGTCTCAATGGGGGCACTGGGGCTGGAGGGCAGGGGTGGGAGGCTCCAGGGGAGGGGTTCCCTCCTGCTAGCTGTGGCAGGAGCCACTTCTCTGGTGACCTTGTTGCTGGCGGTGCCTATCACTGTCCTGGCTGTGCTGGCCTTAGTGCCCCAGGA	.	Long RNA	LTB	.	.	.	.	-83.4	0.880468	0.898622	0.883359	No	0
[truncated: 194 more rows]

## Sheet: RBP list
RBP(109)	RBP(IDR, 150)
[truncated: 150 more rows]

[truncated: 7 more sheets: miRNA(full-length intron), PhastCon scores, Rfam results, DNase I (Kraken2), NaOH (Kraken2), MACS2 peaks (Transcriptome), Peaks (retrotransposed mRNA)]
